# Supplementary material for: Divergent roles of m6A in orchestrating brown and white adipocyte transcriptomes and systemic metabolism
Source: Springer Nature journal article supplement (doi:10.1038/s41467-024-55694-w), 2025-01-09

Figure 1a

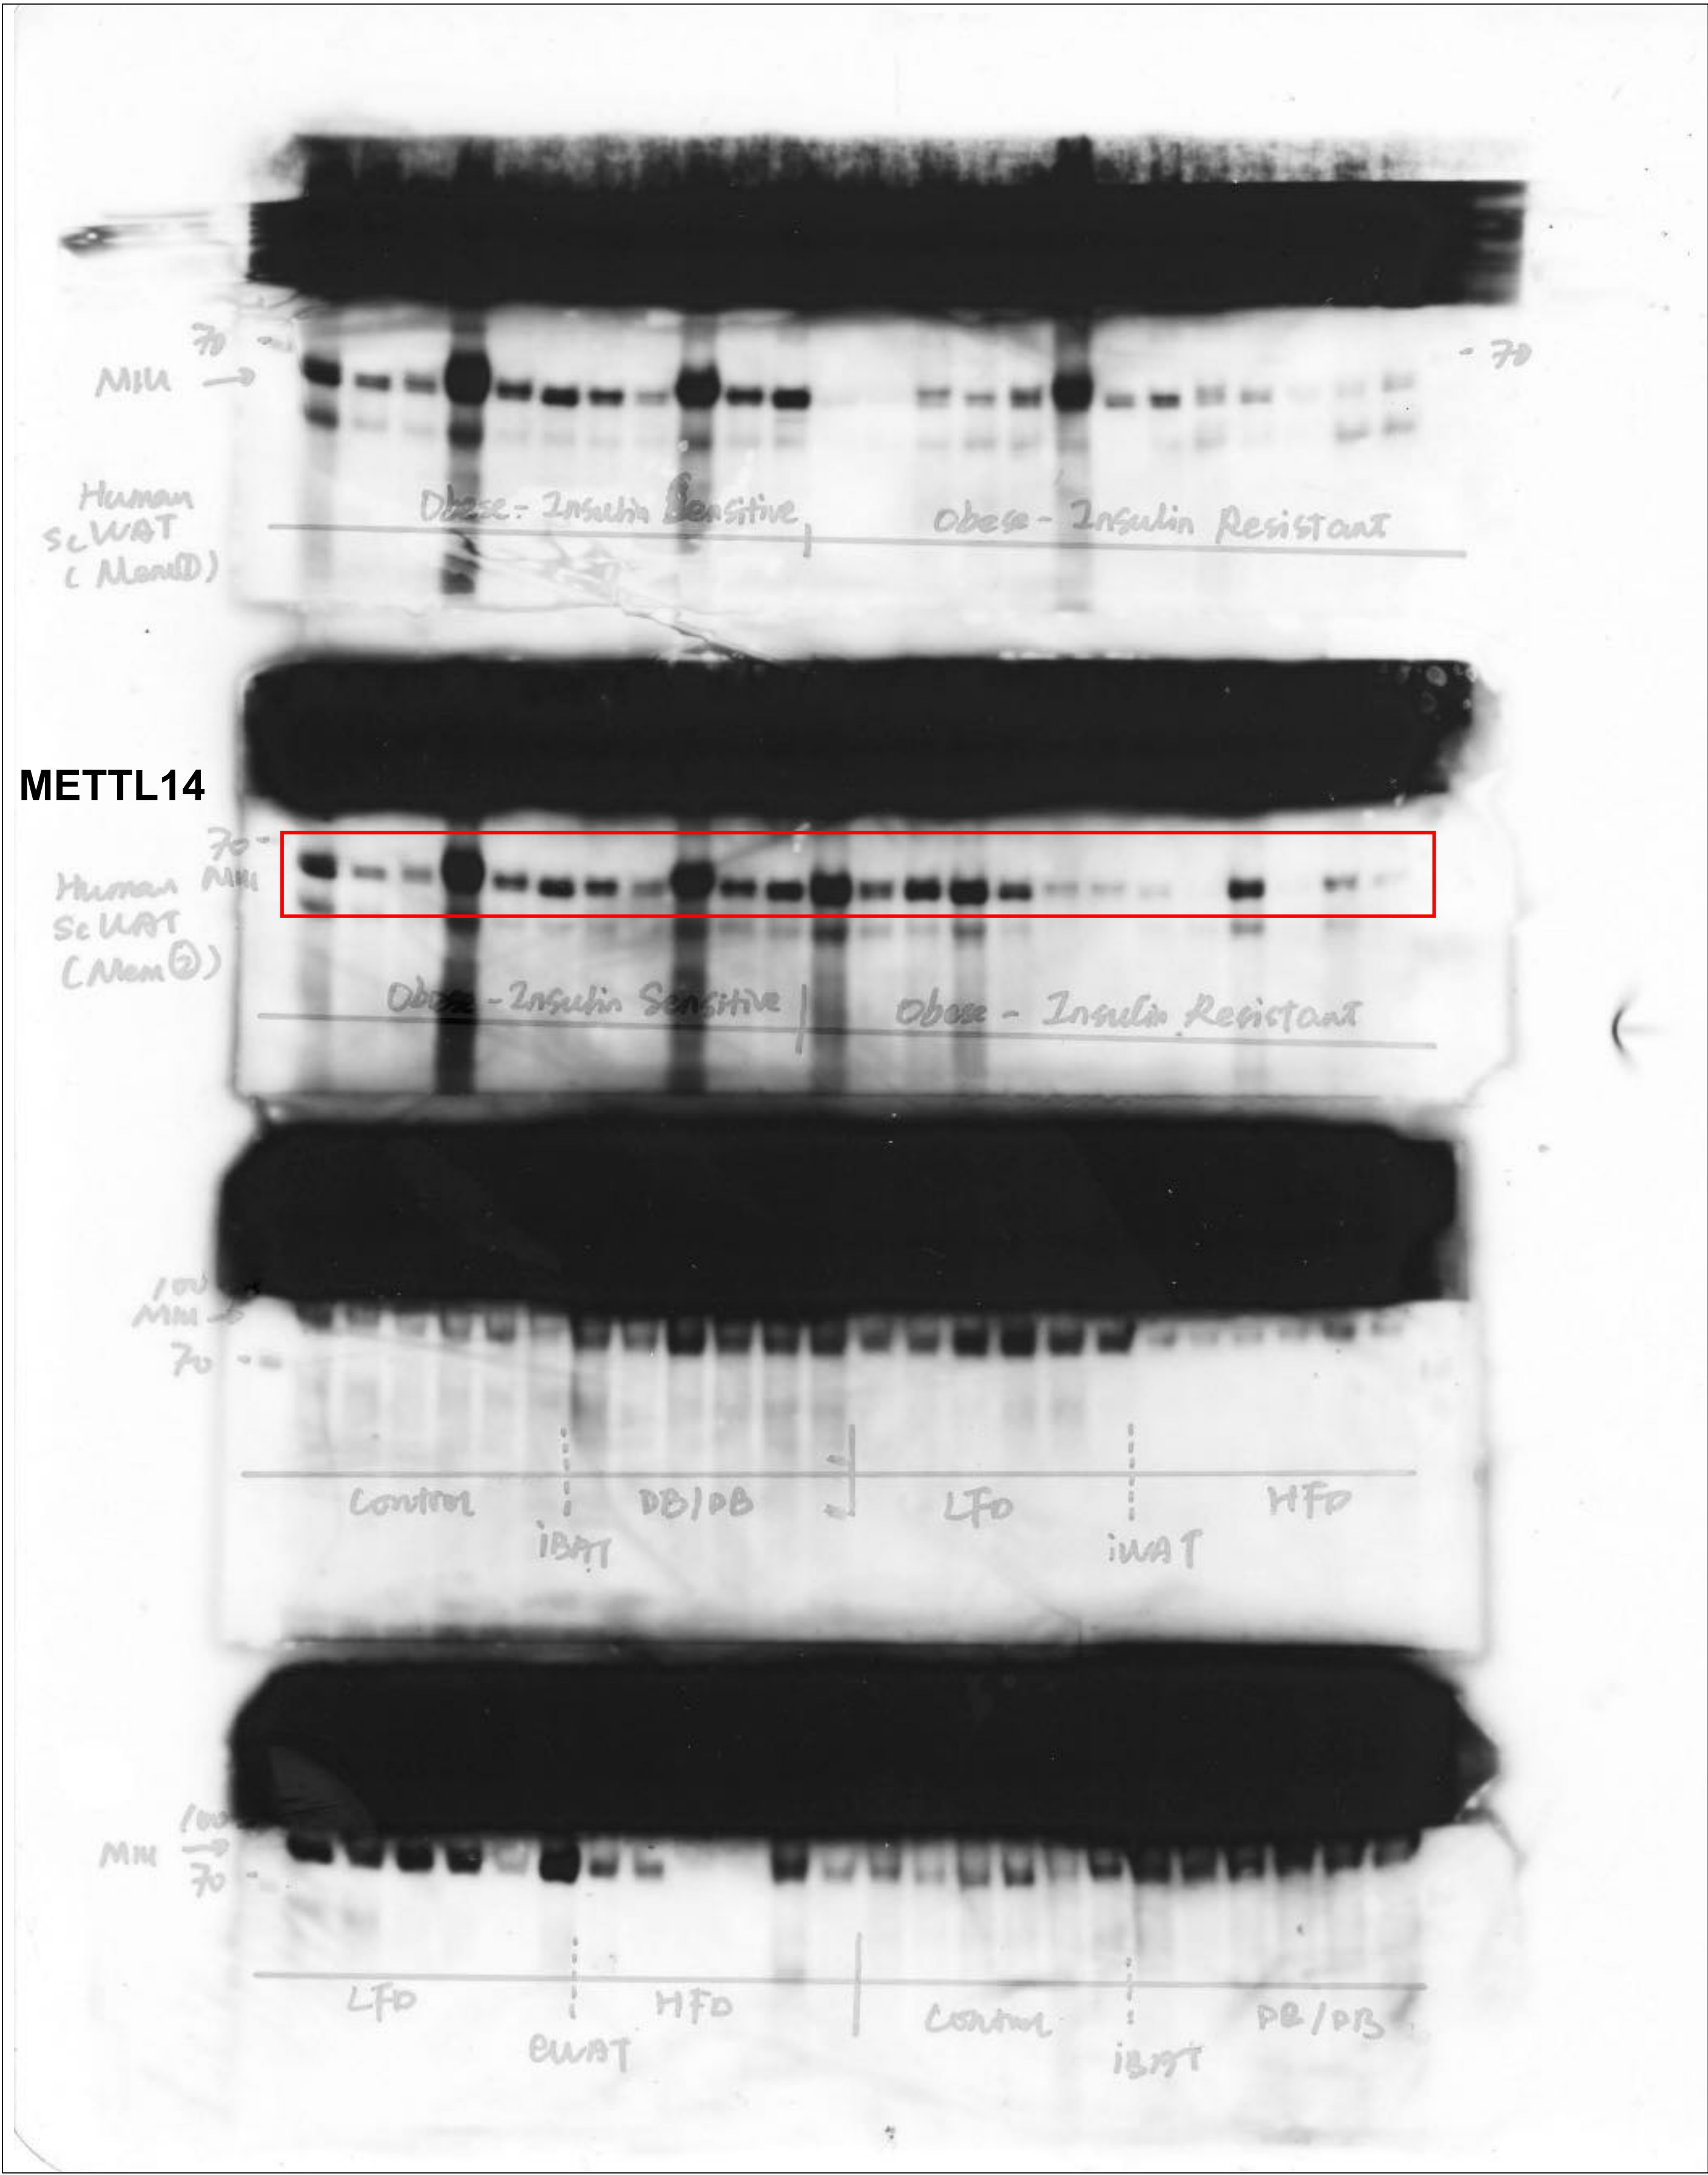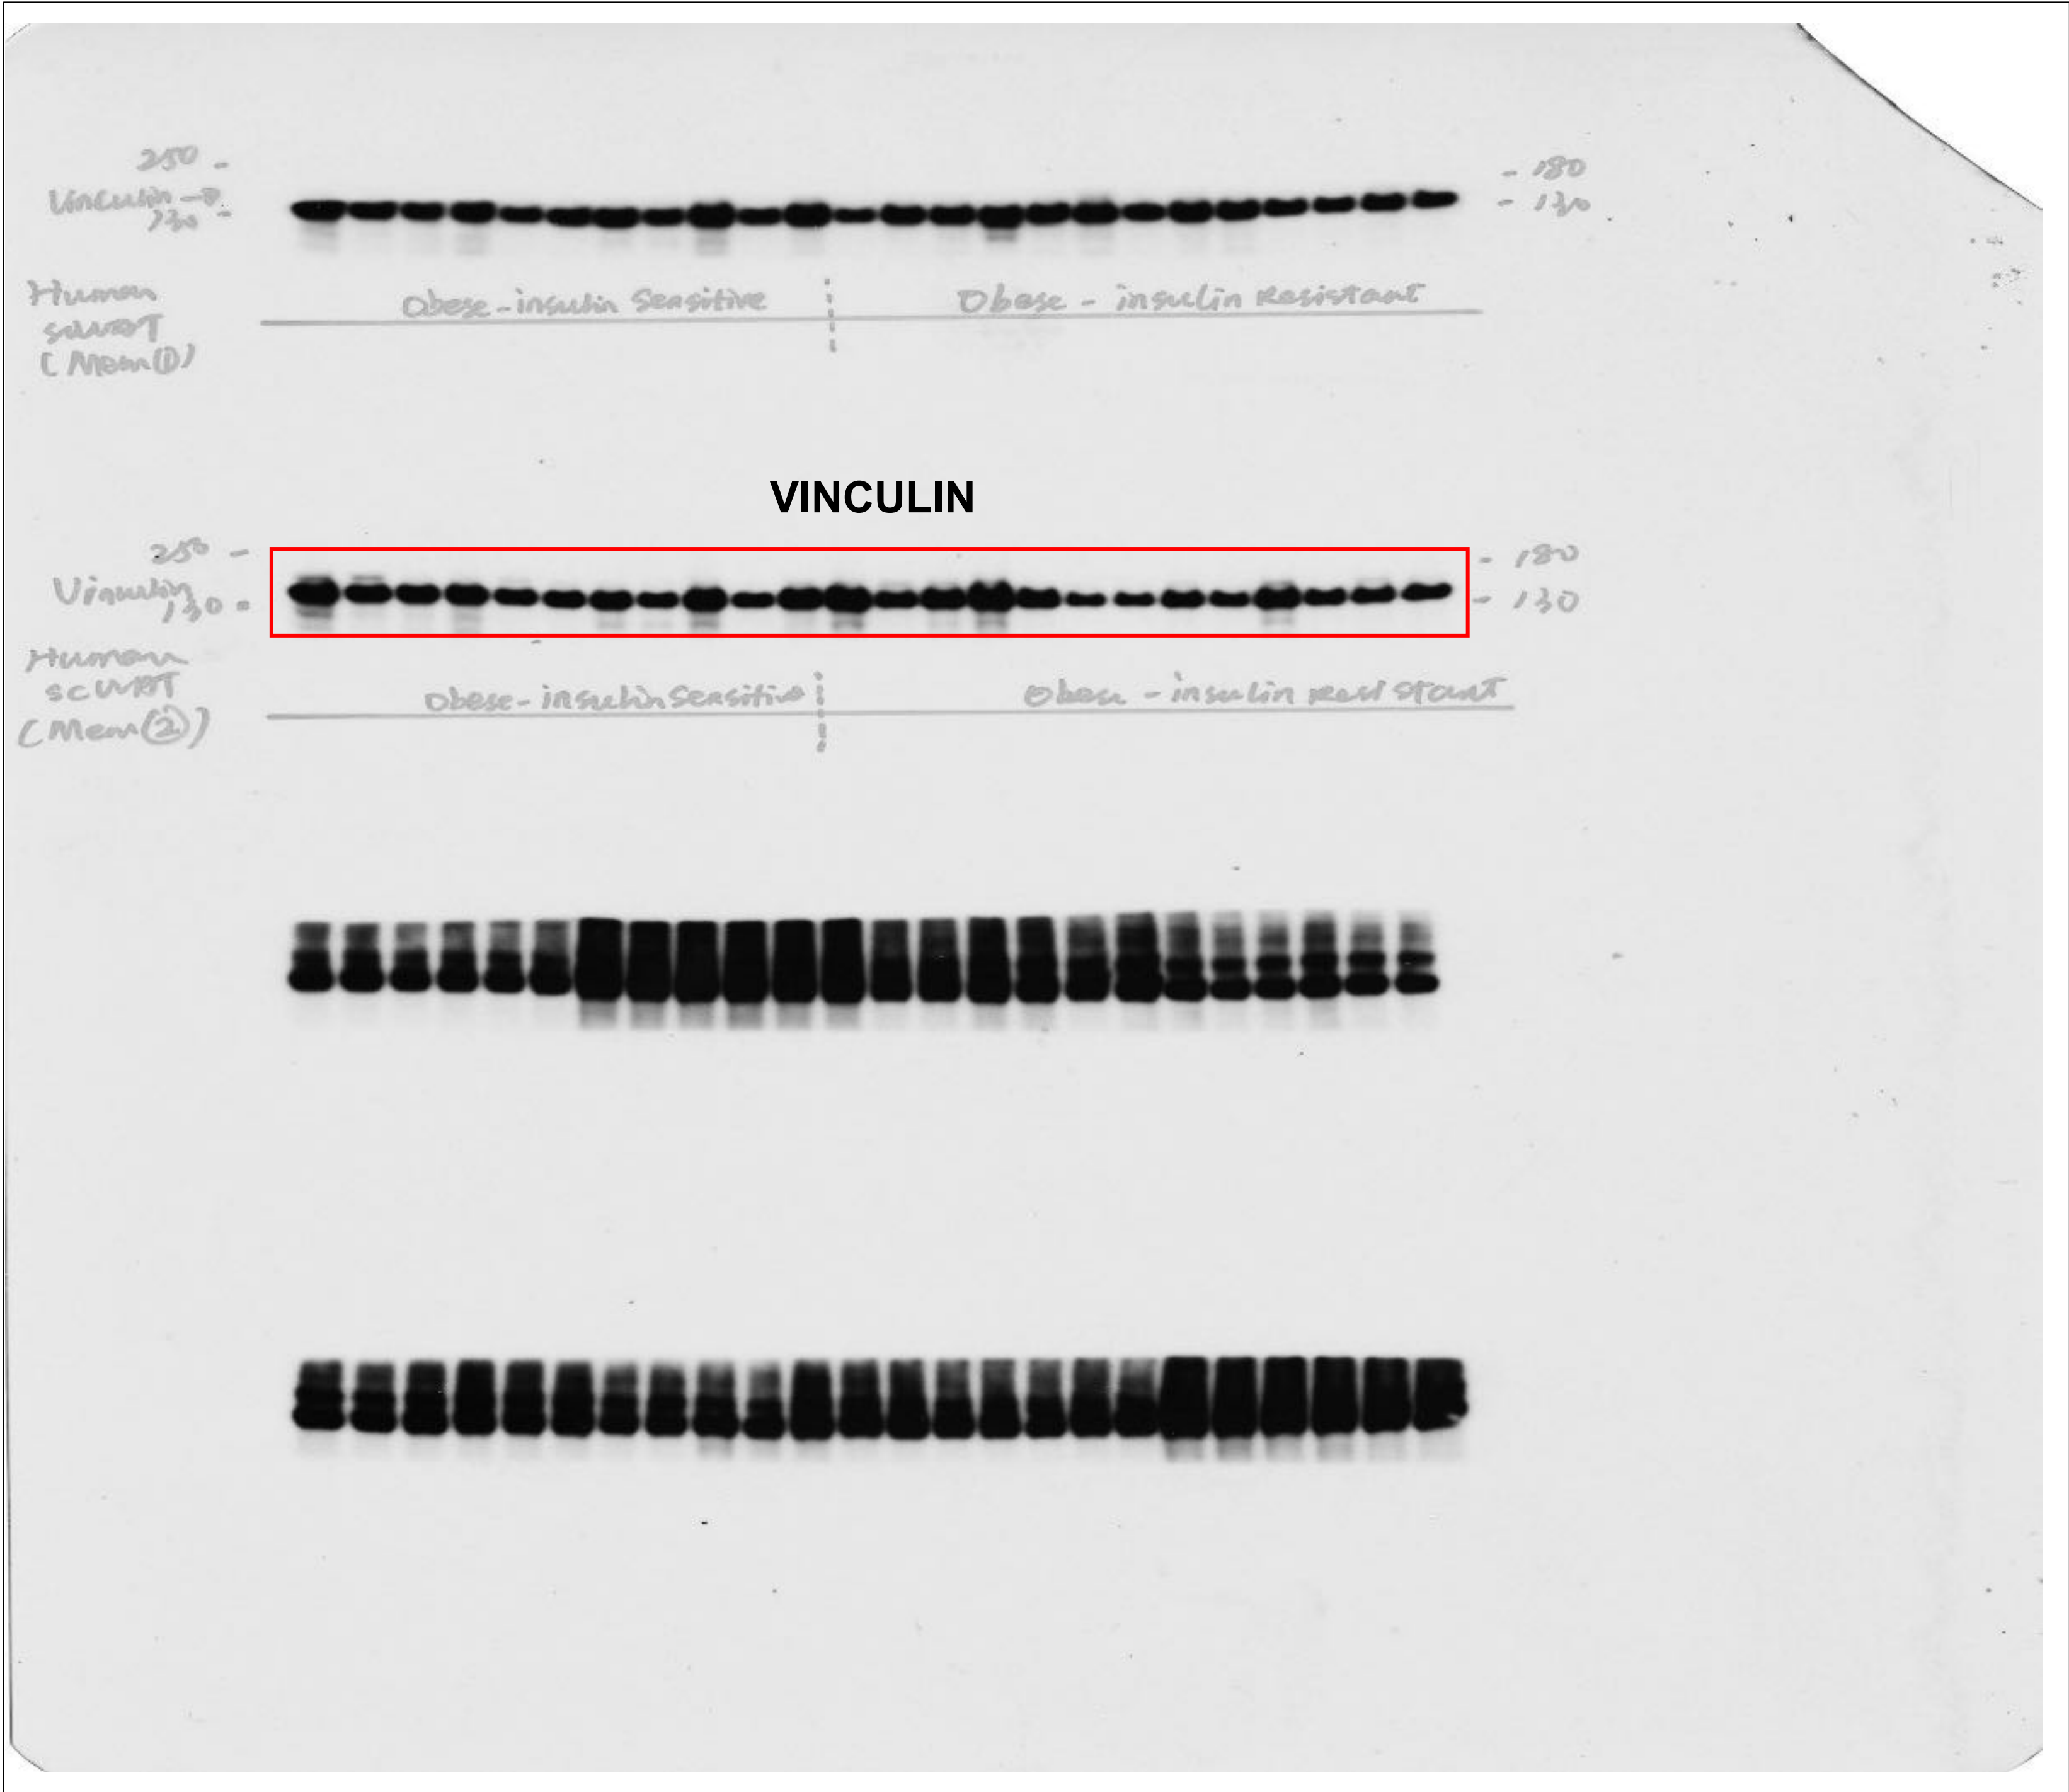



Figure 1a

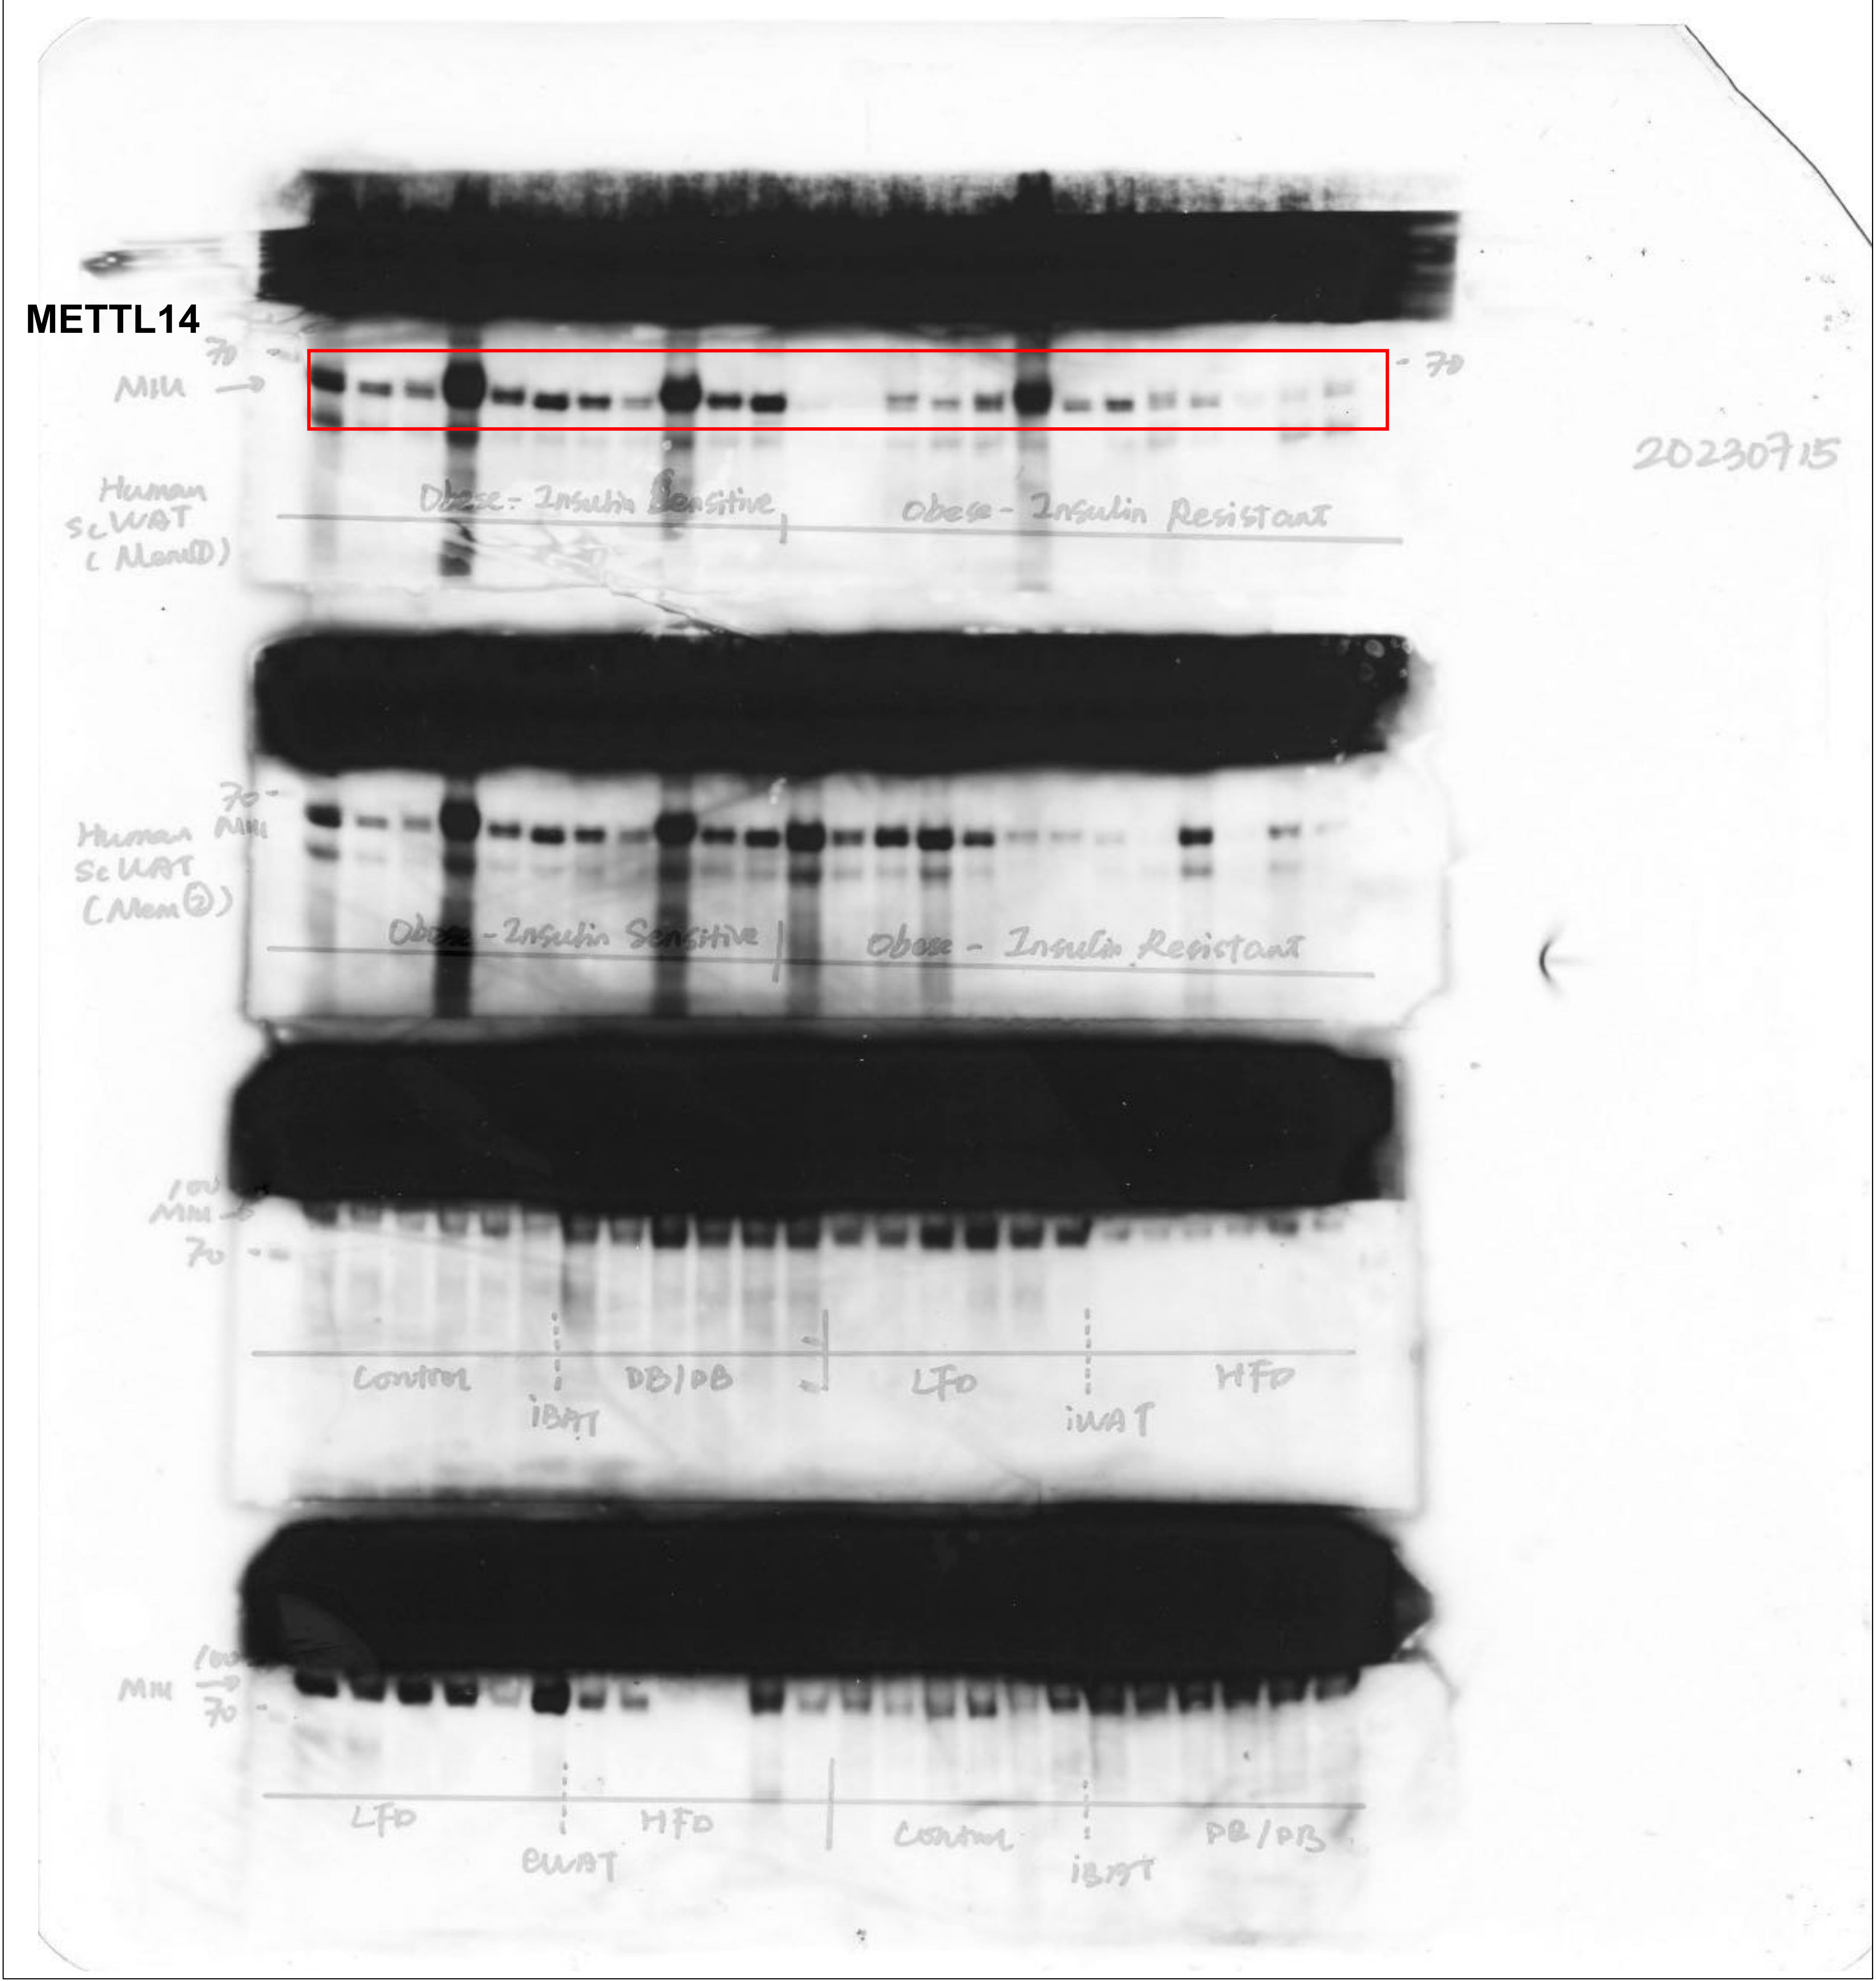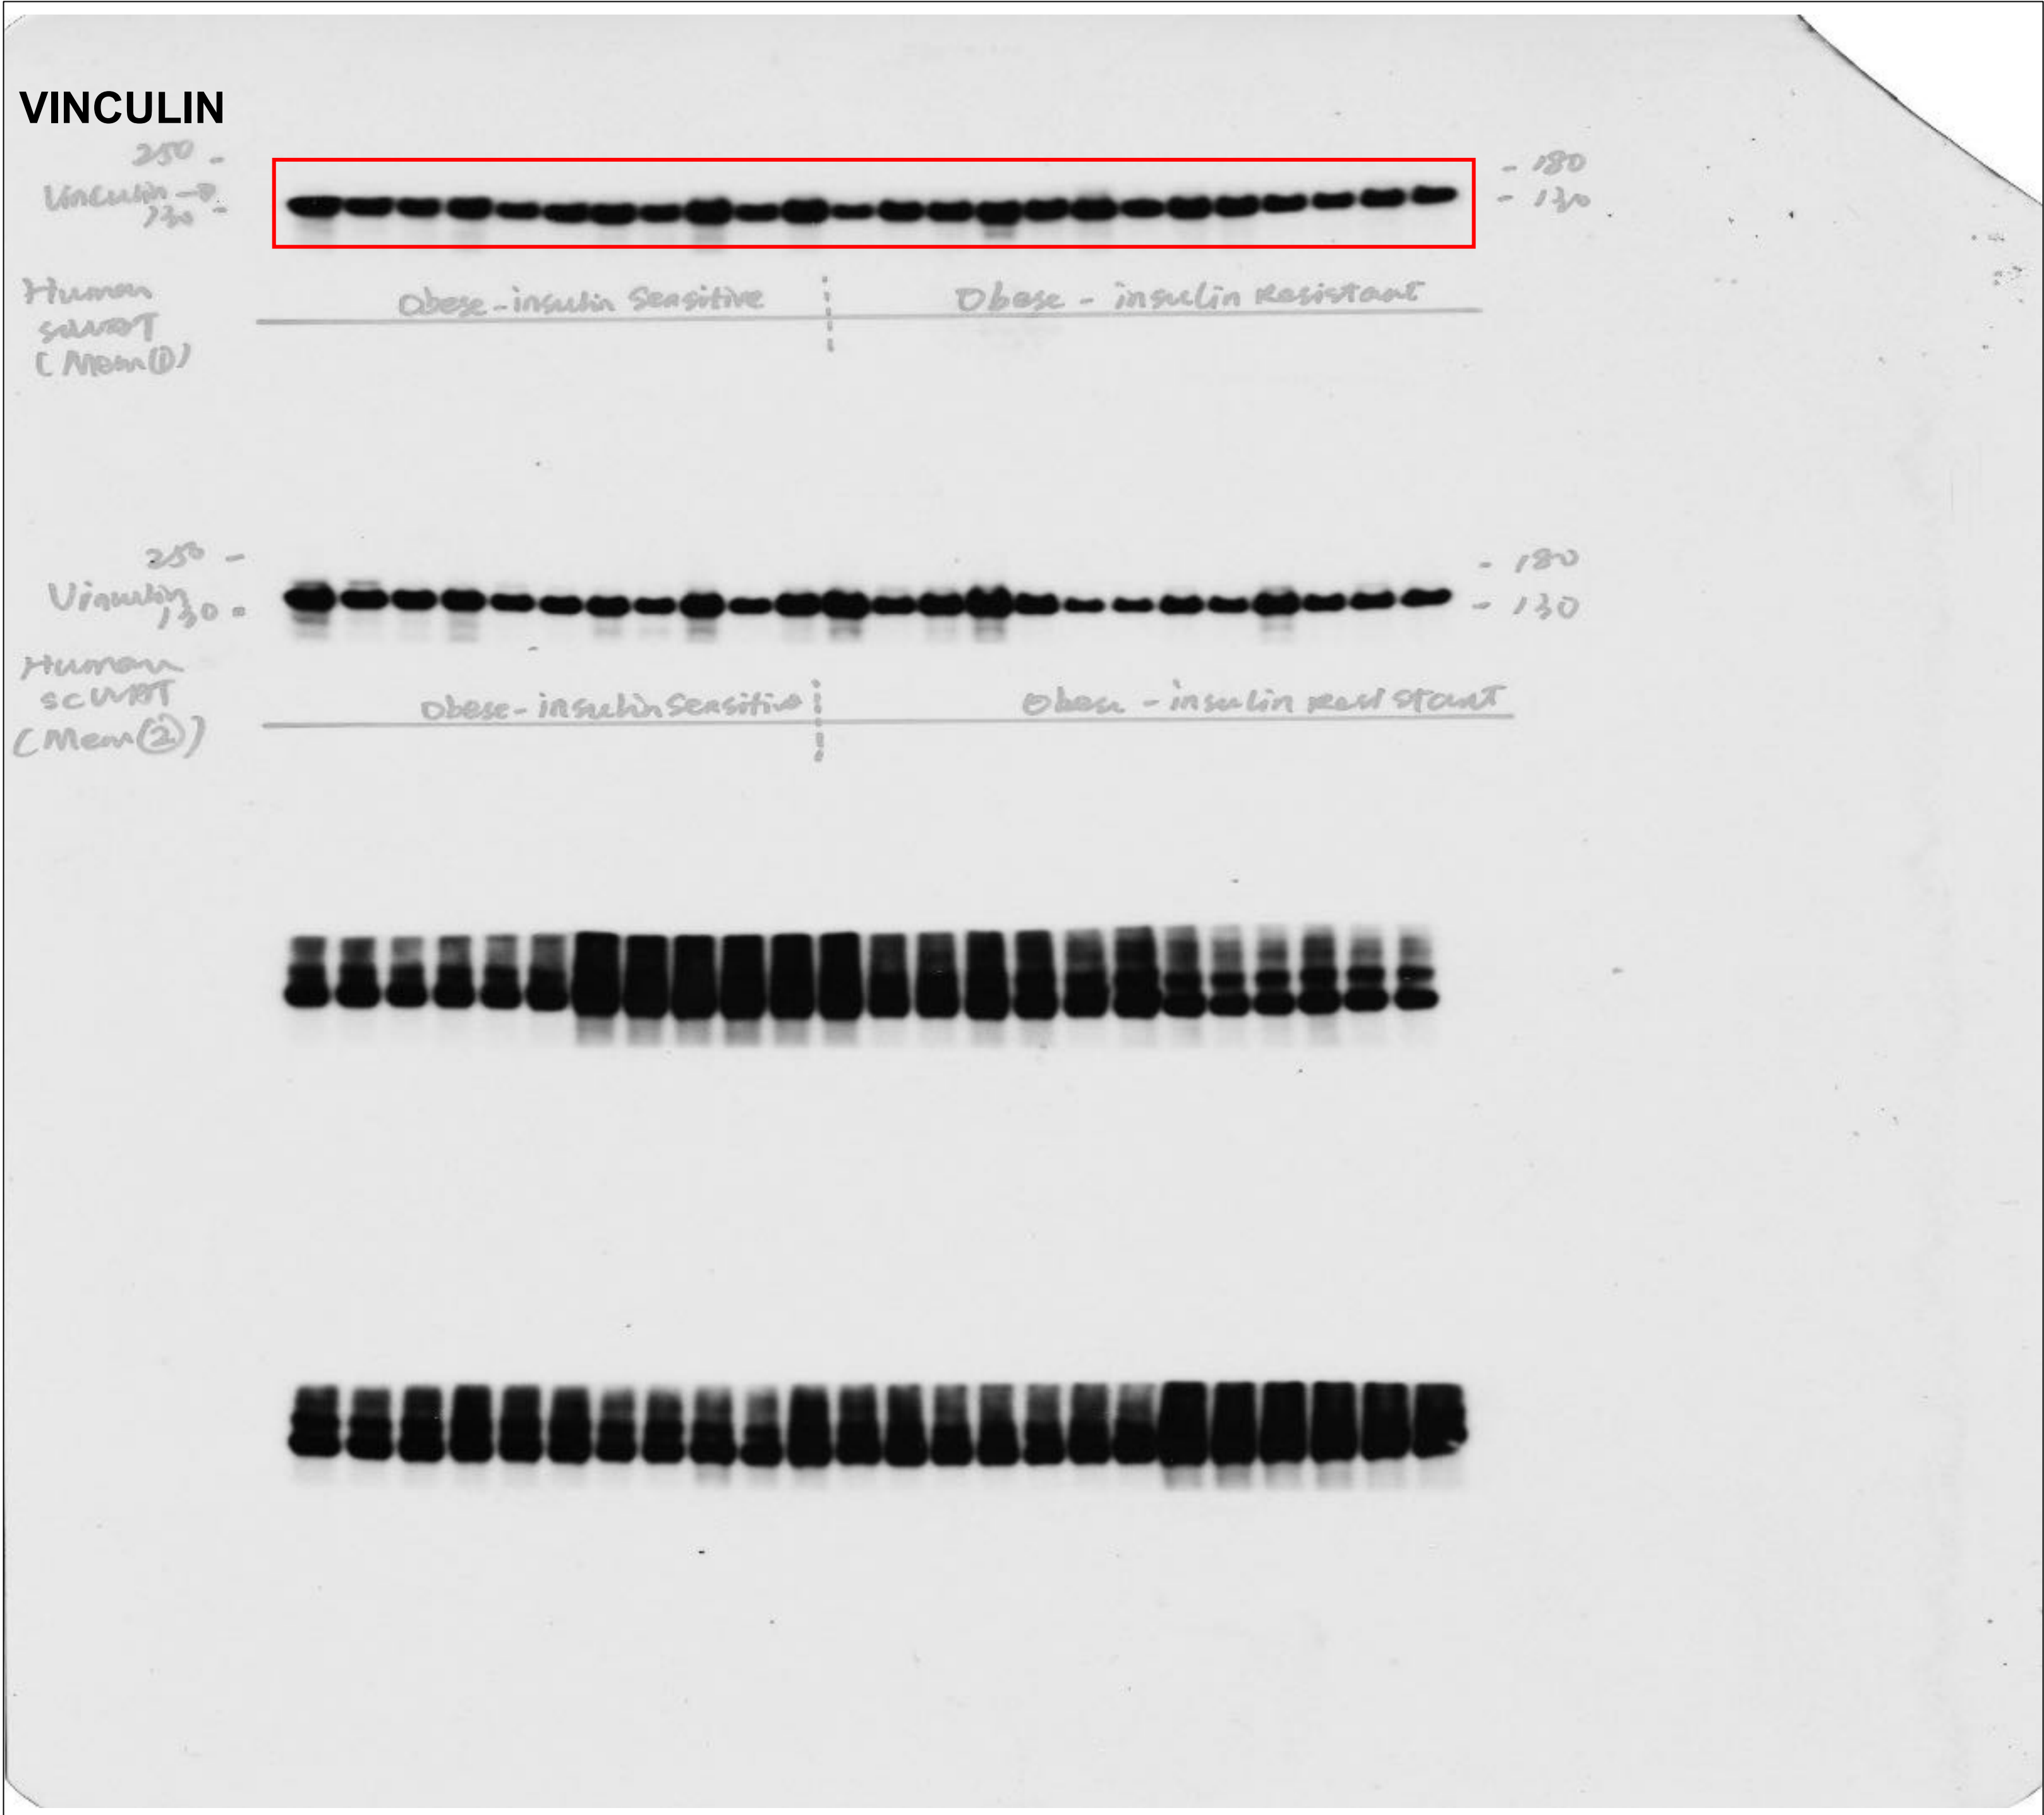



Figure 1a

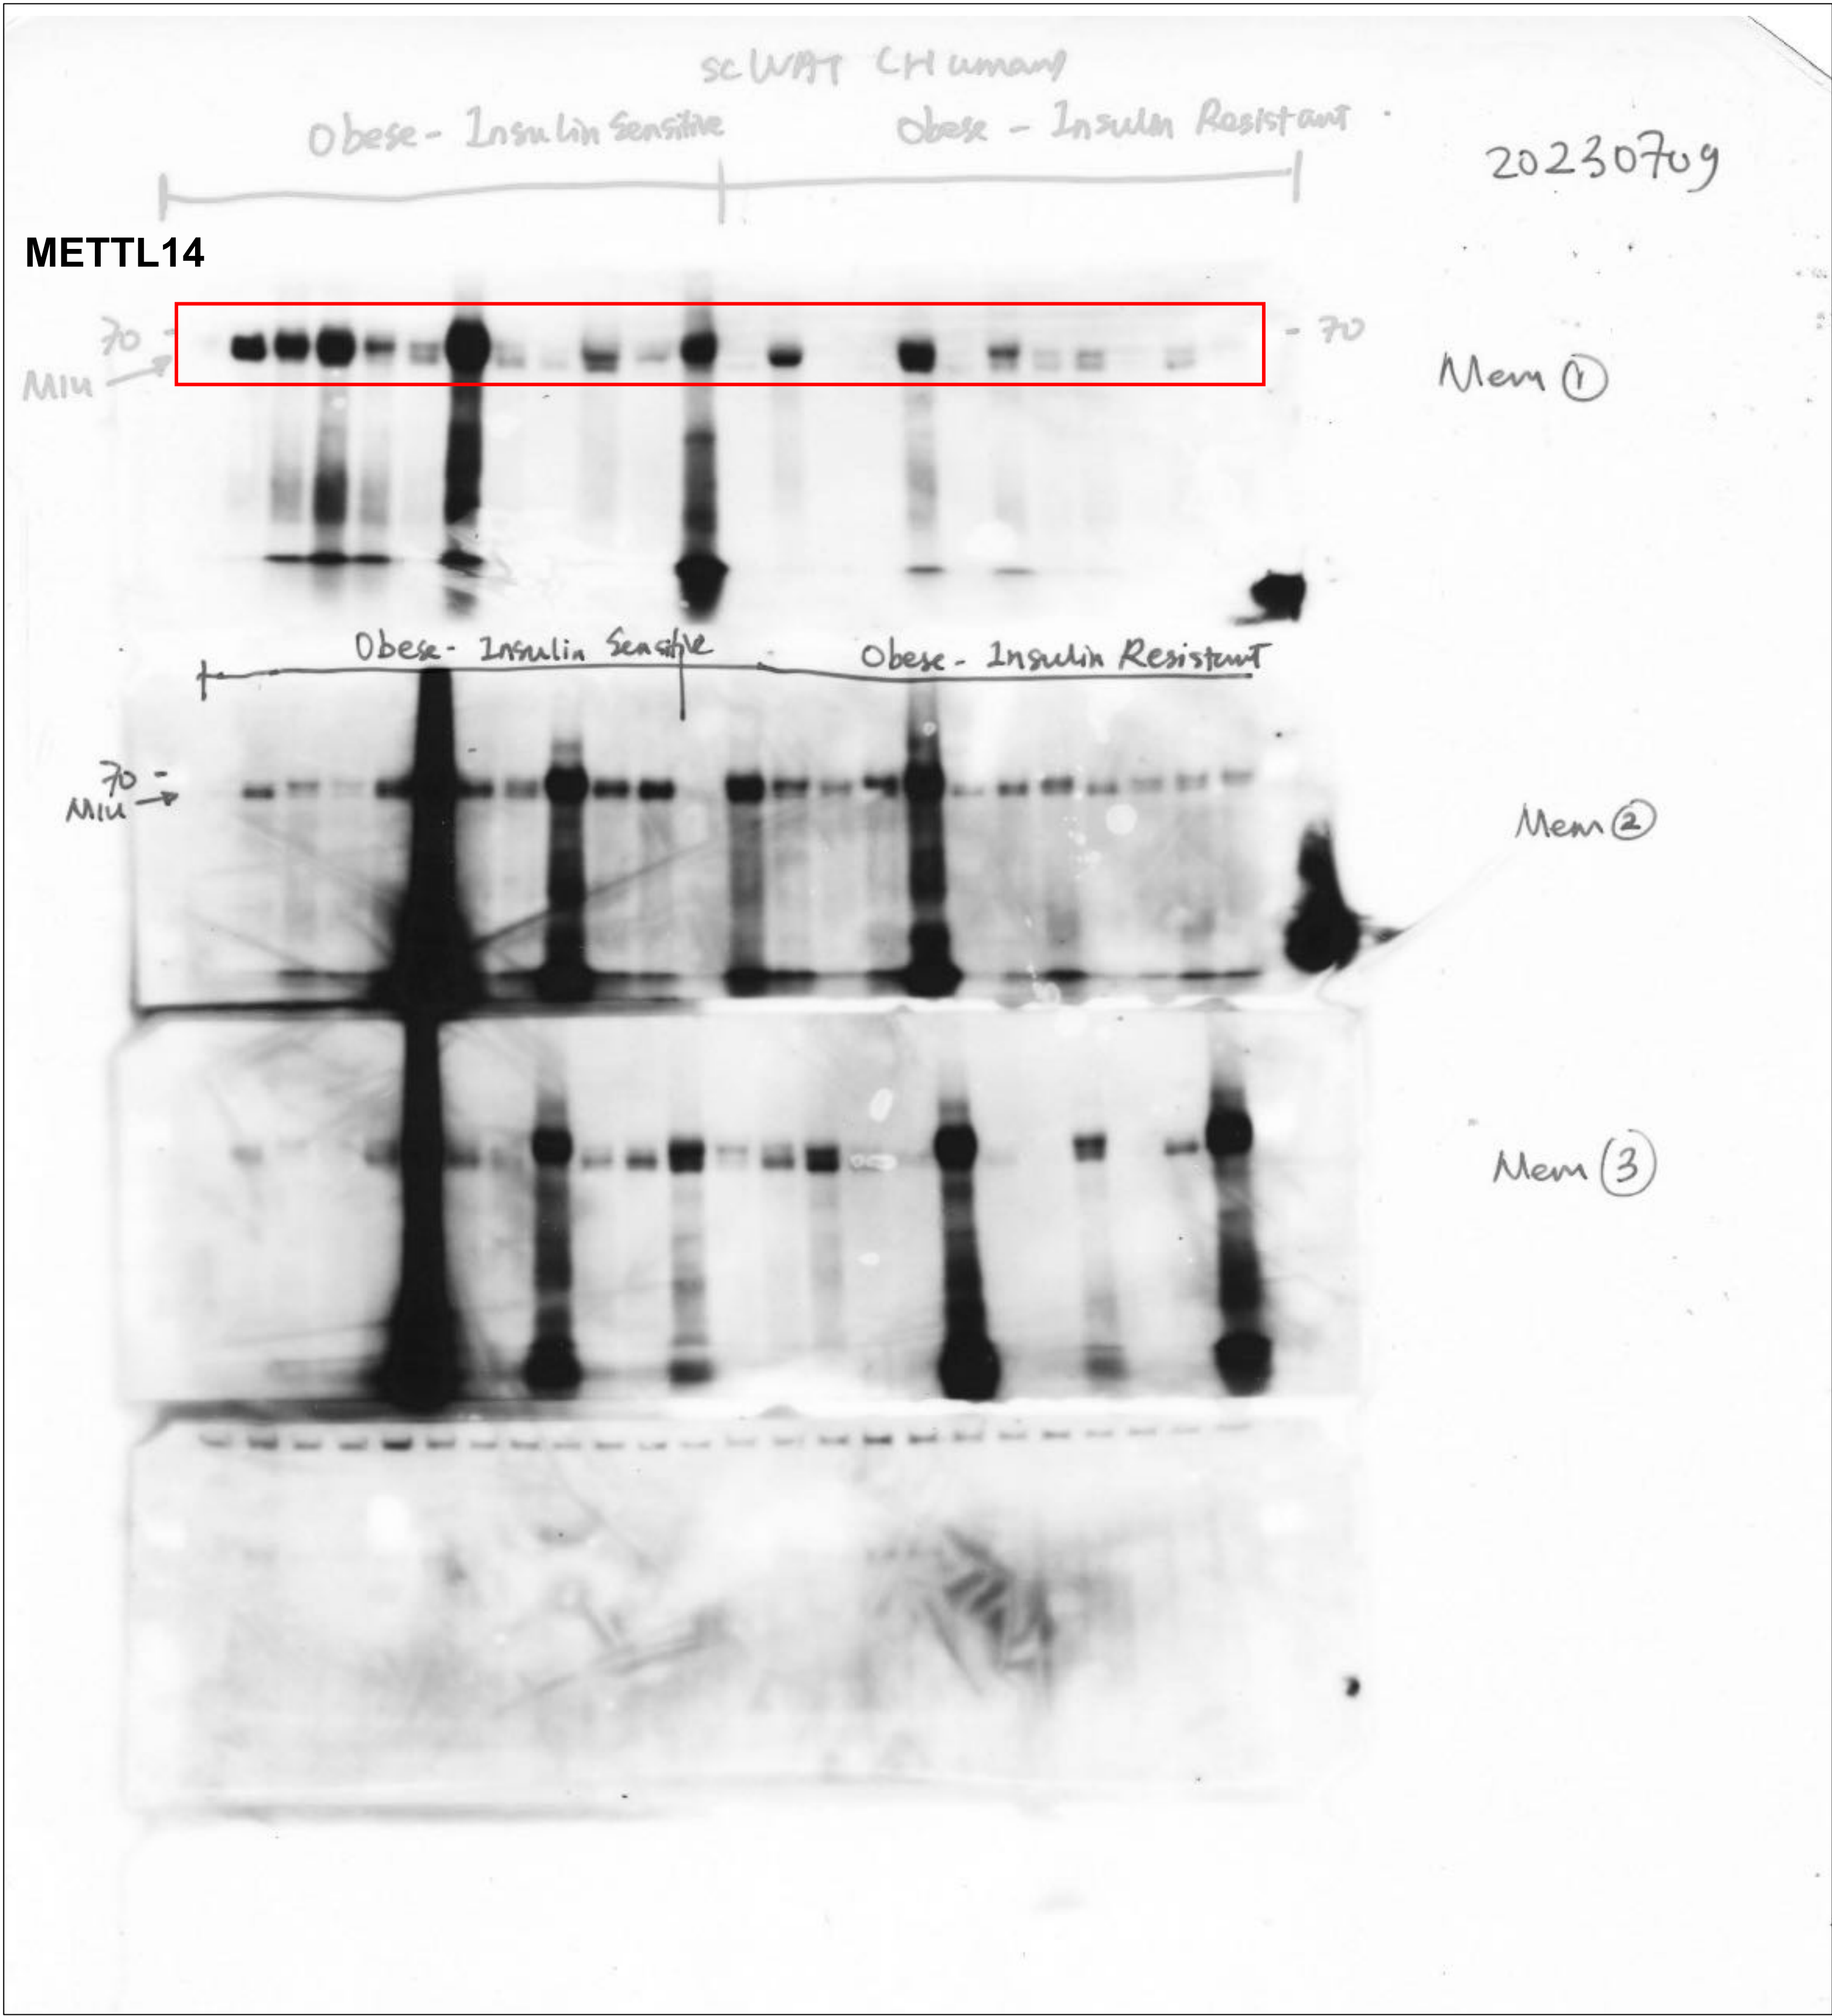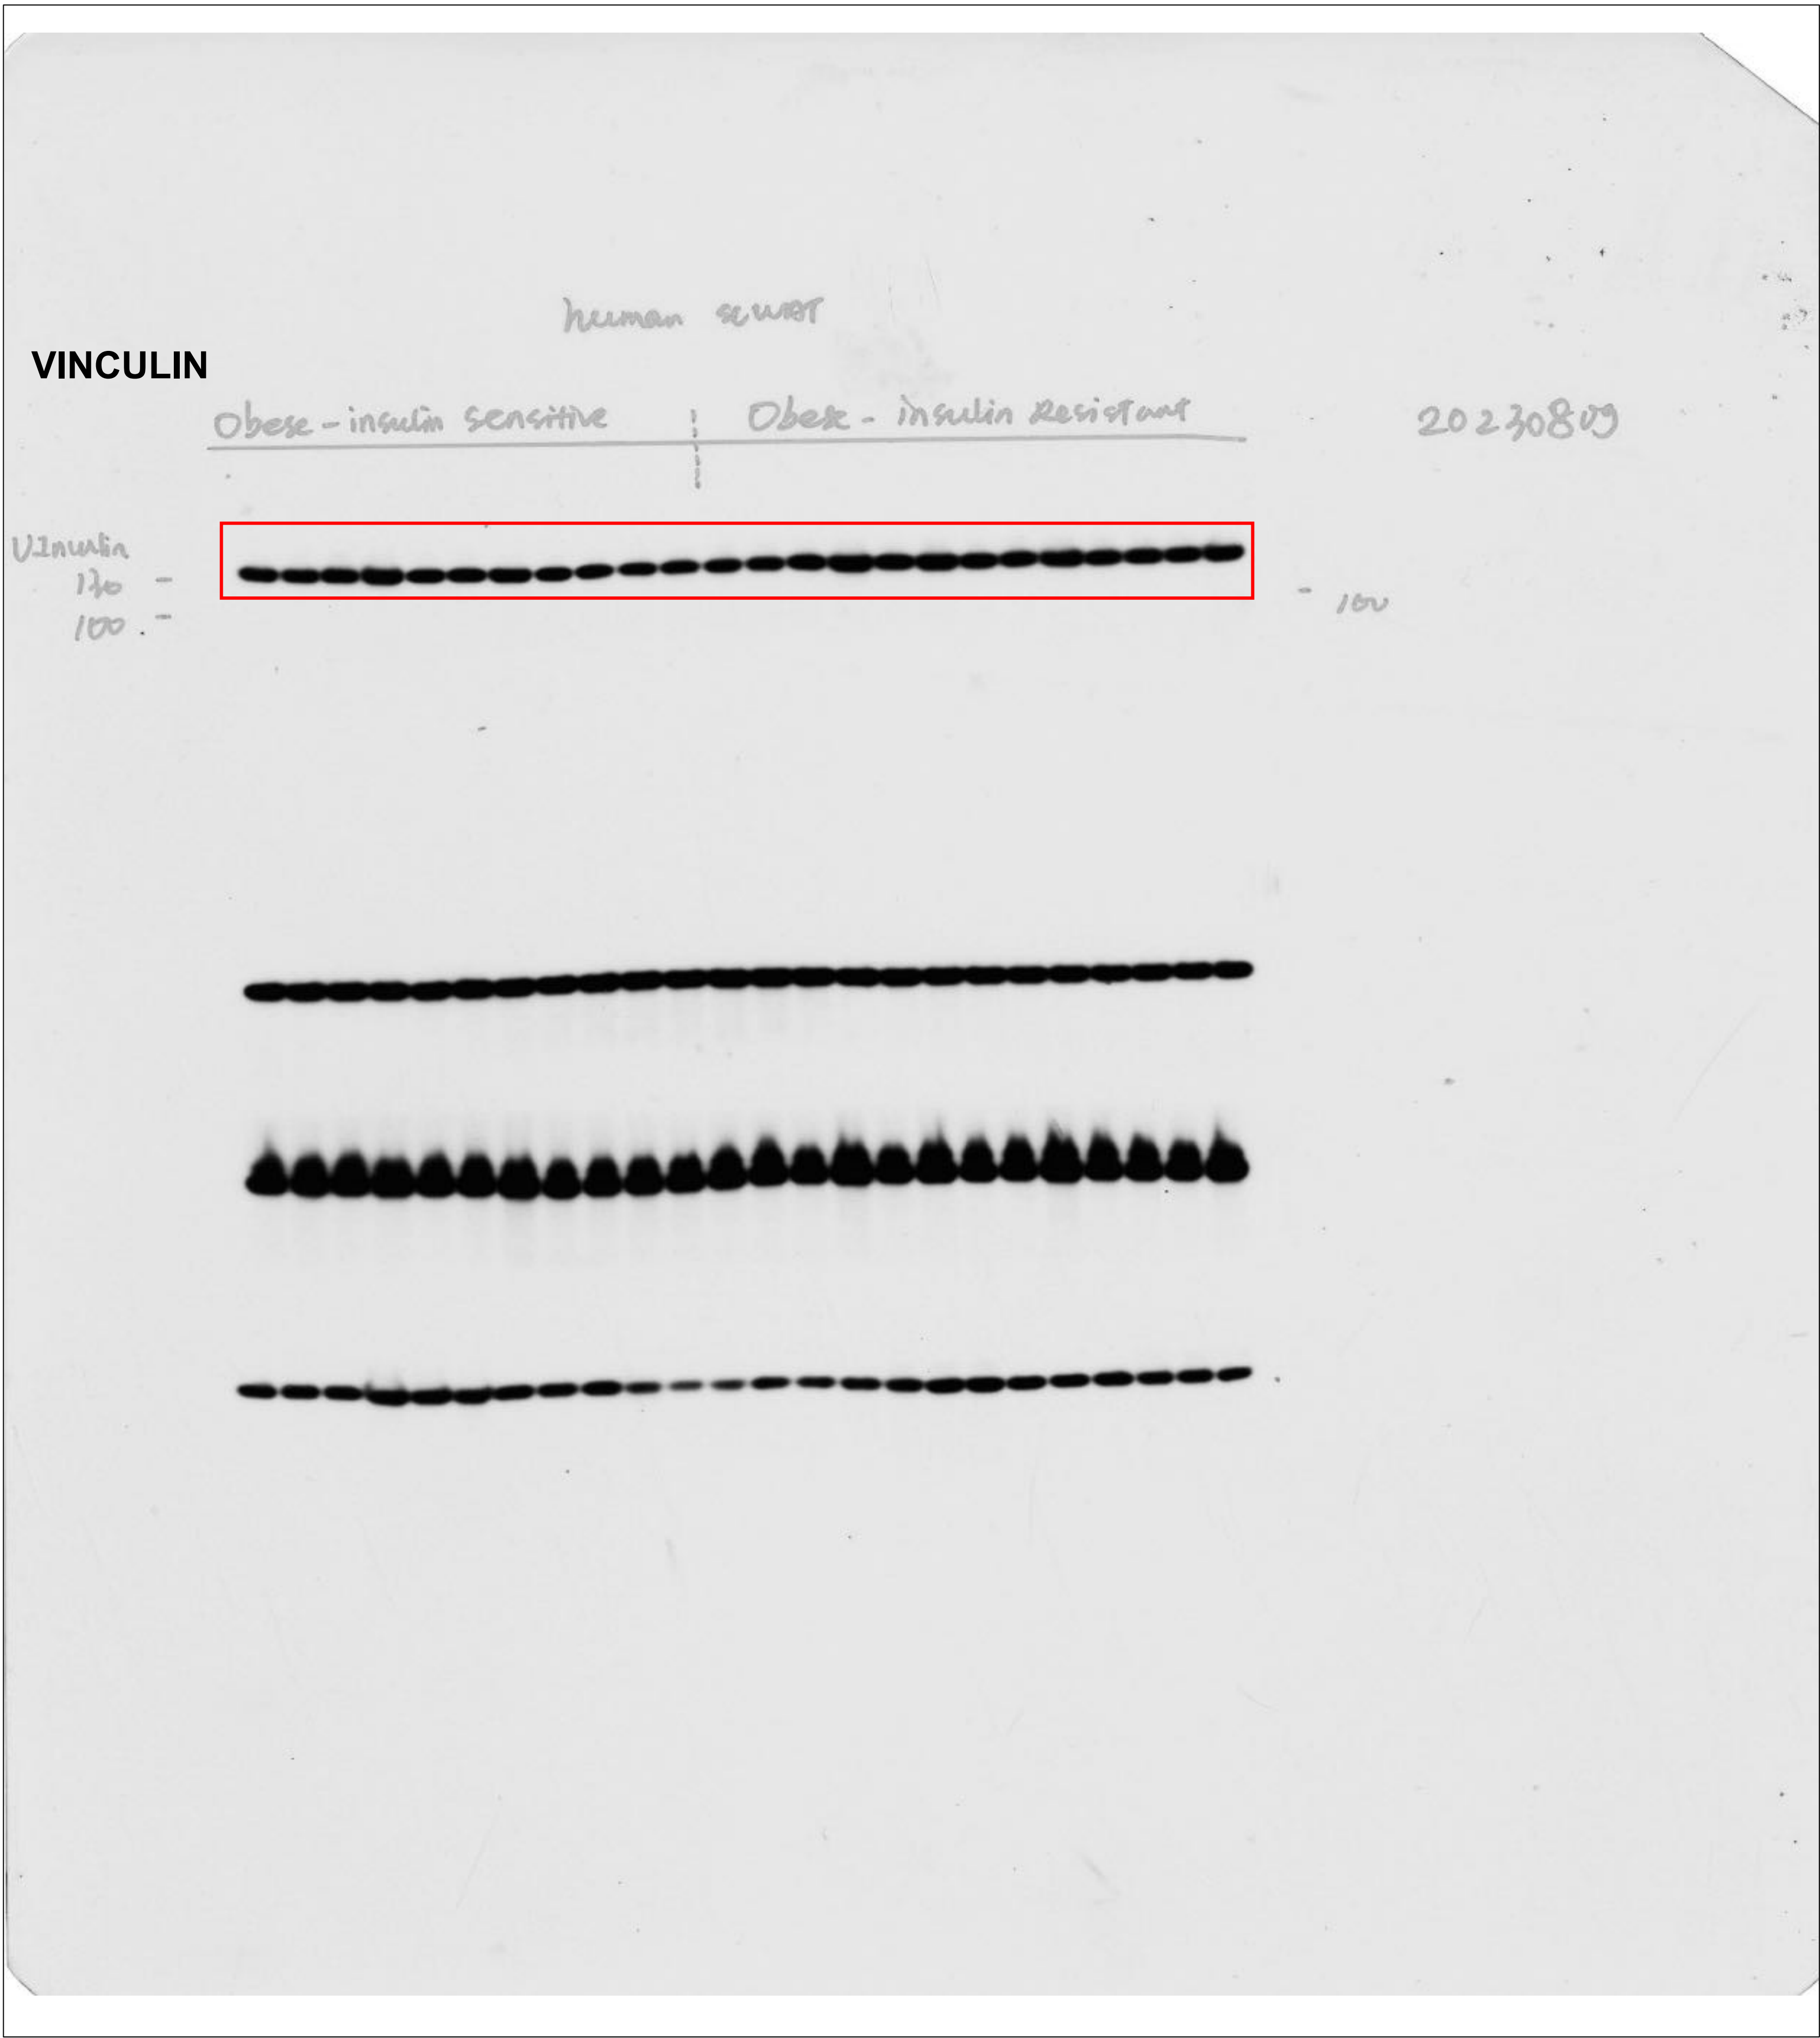

Figure 1e

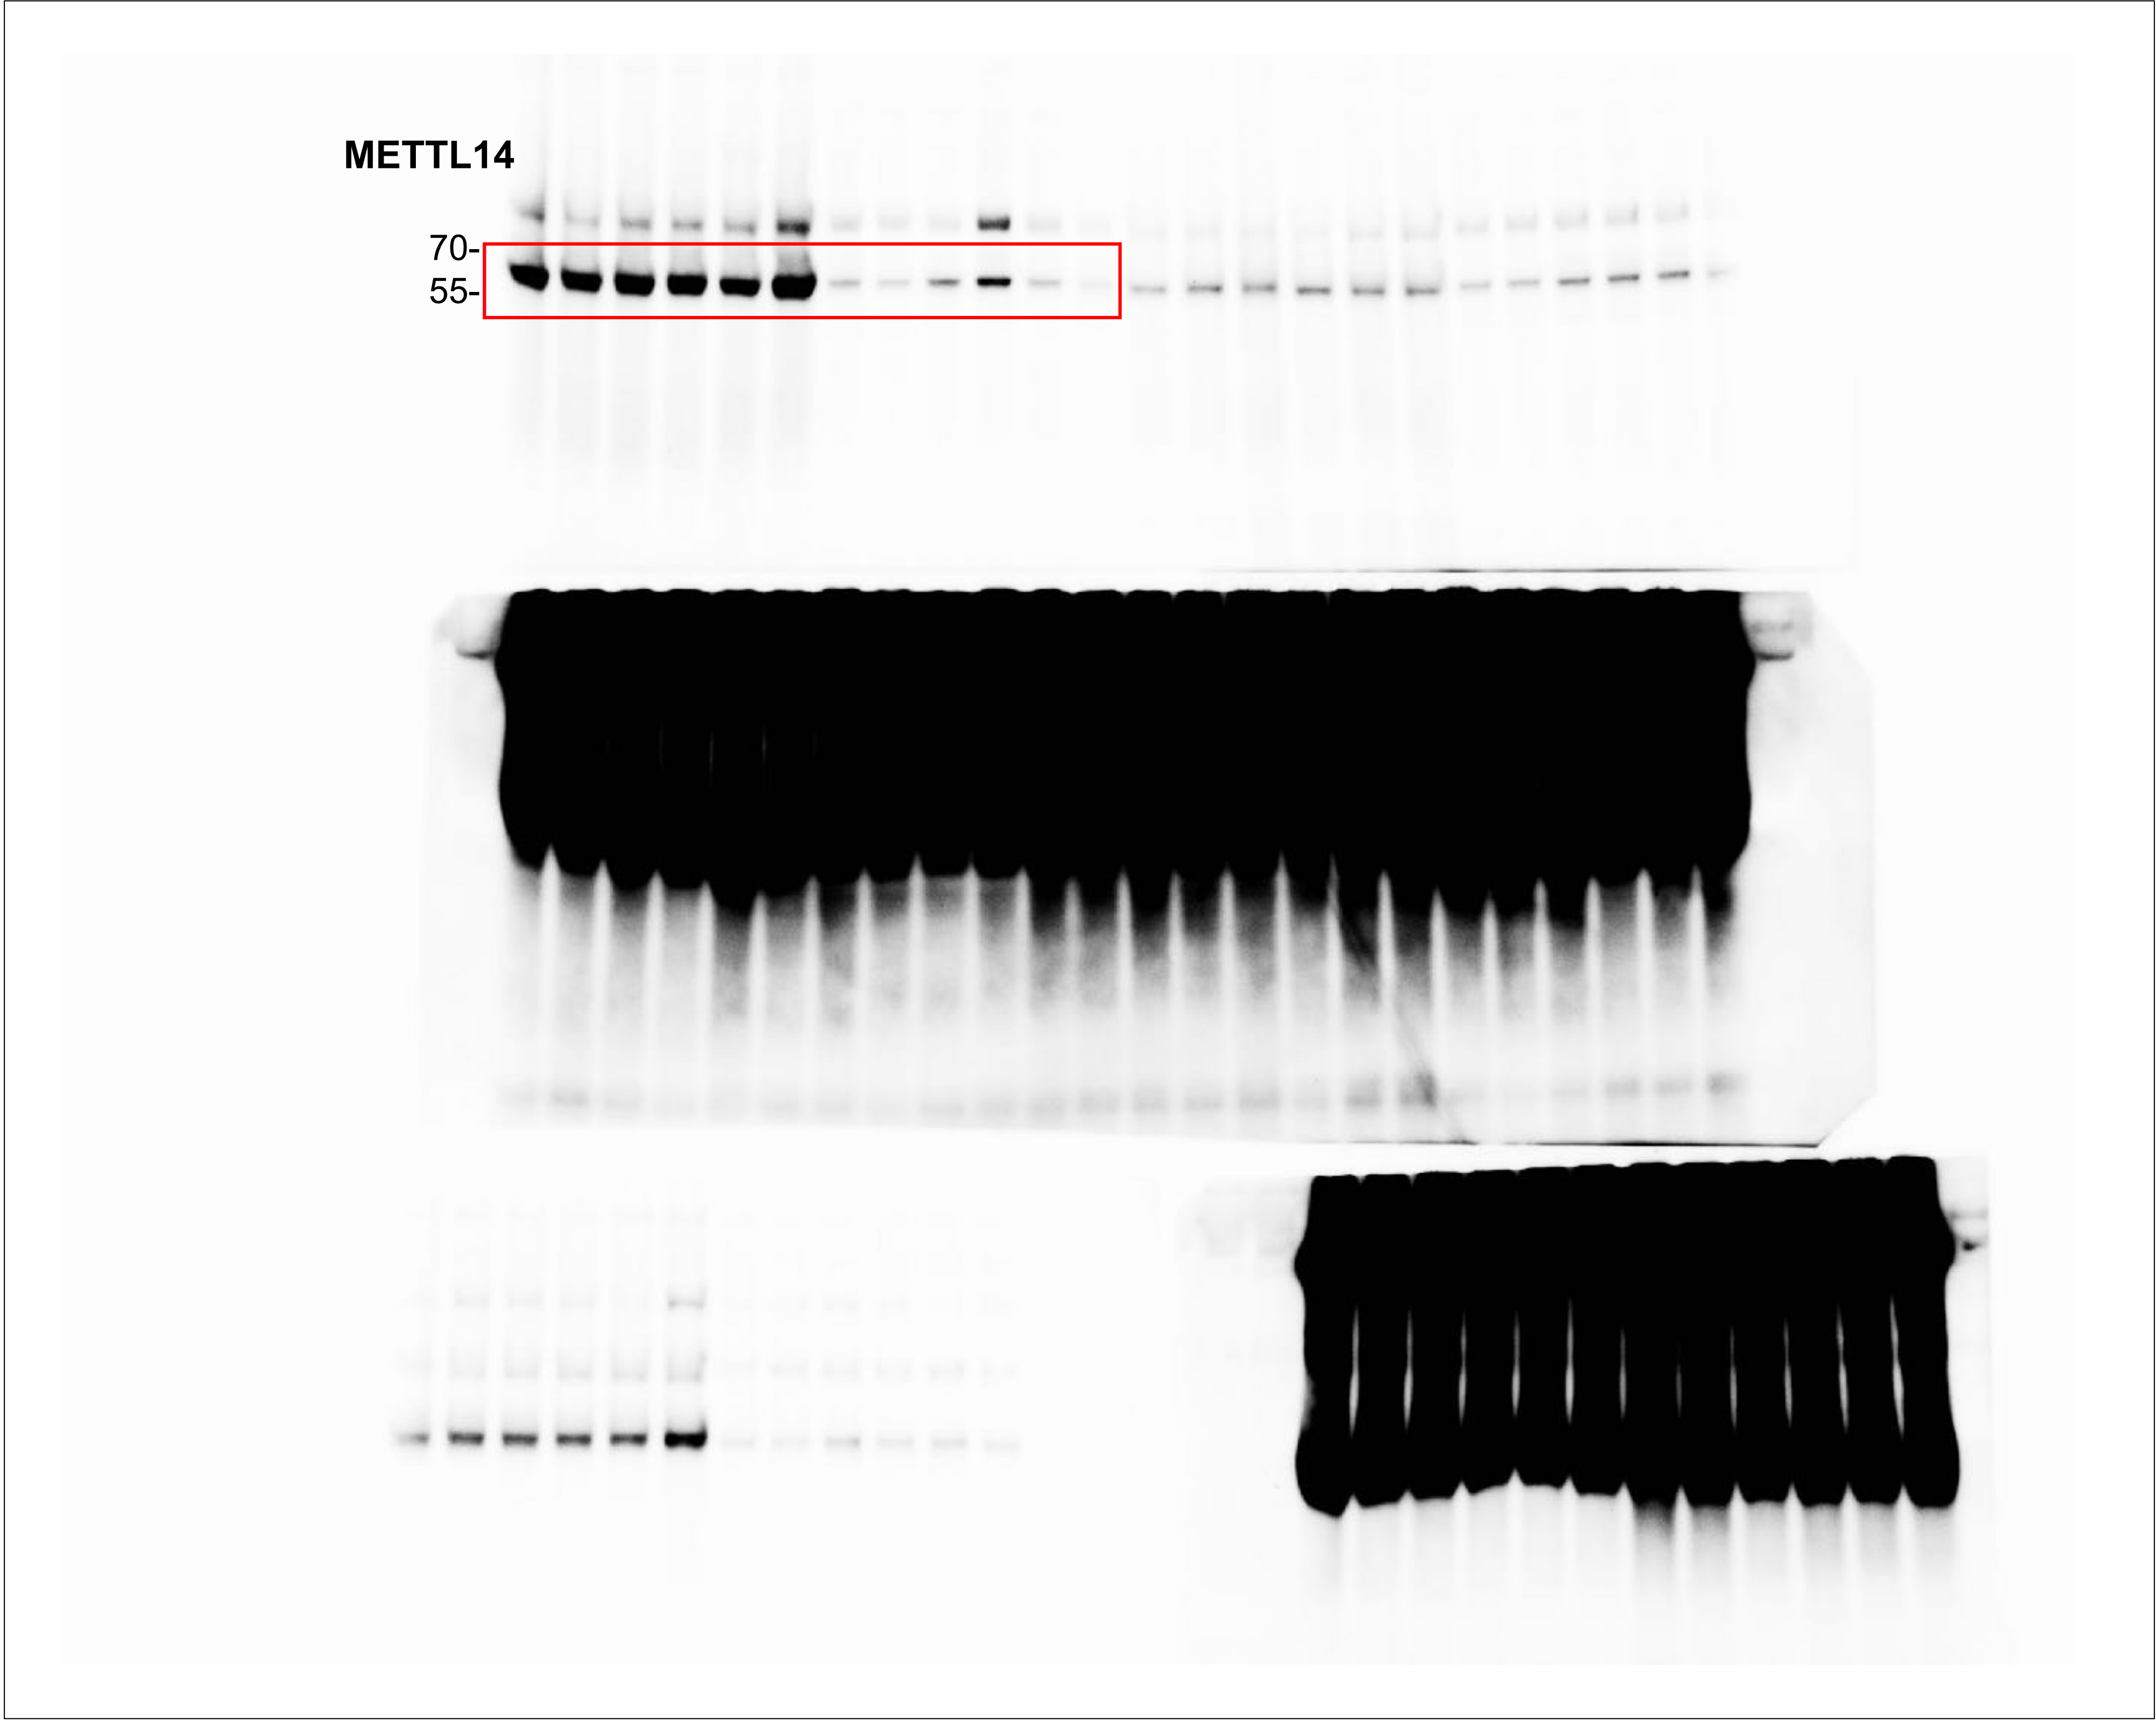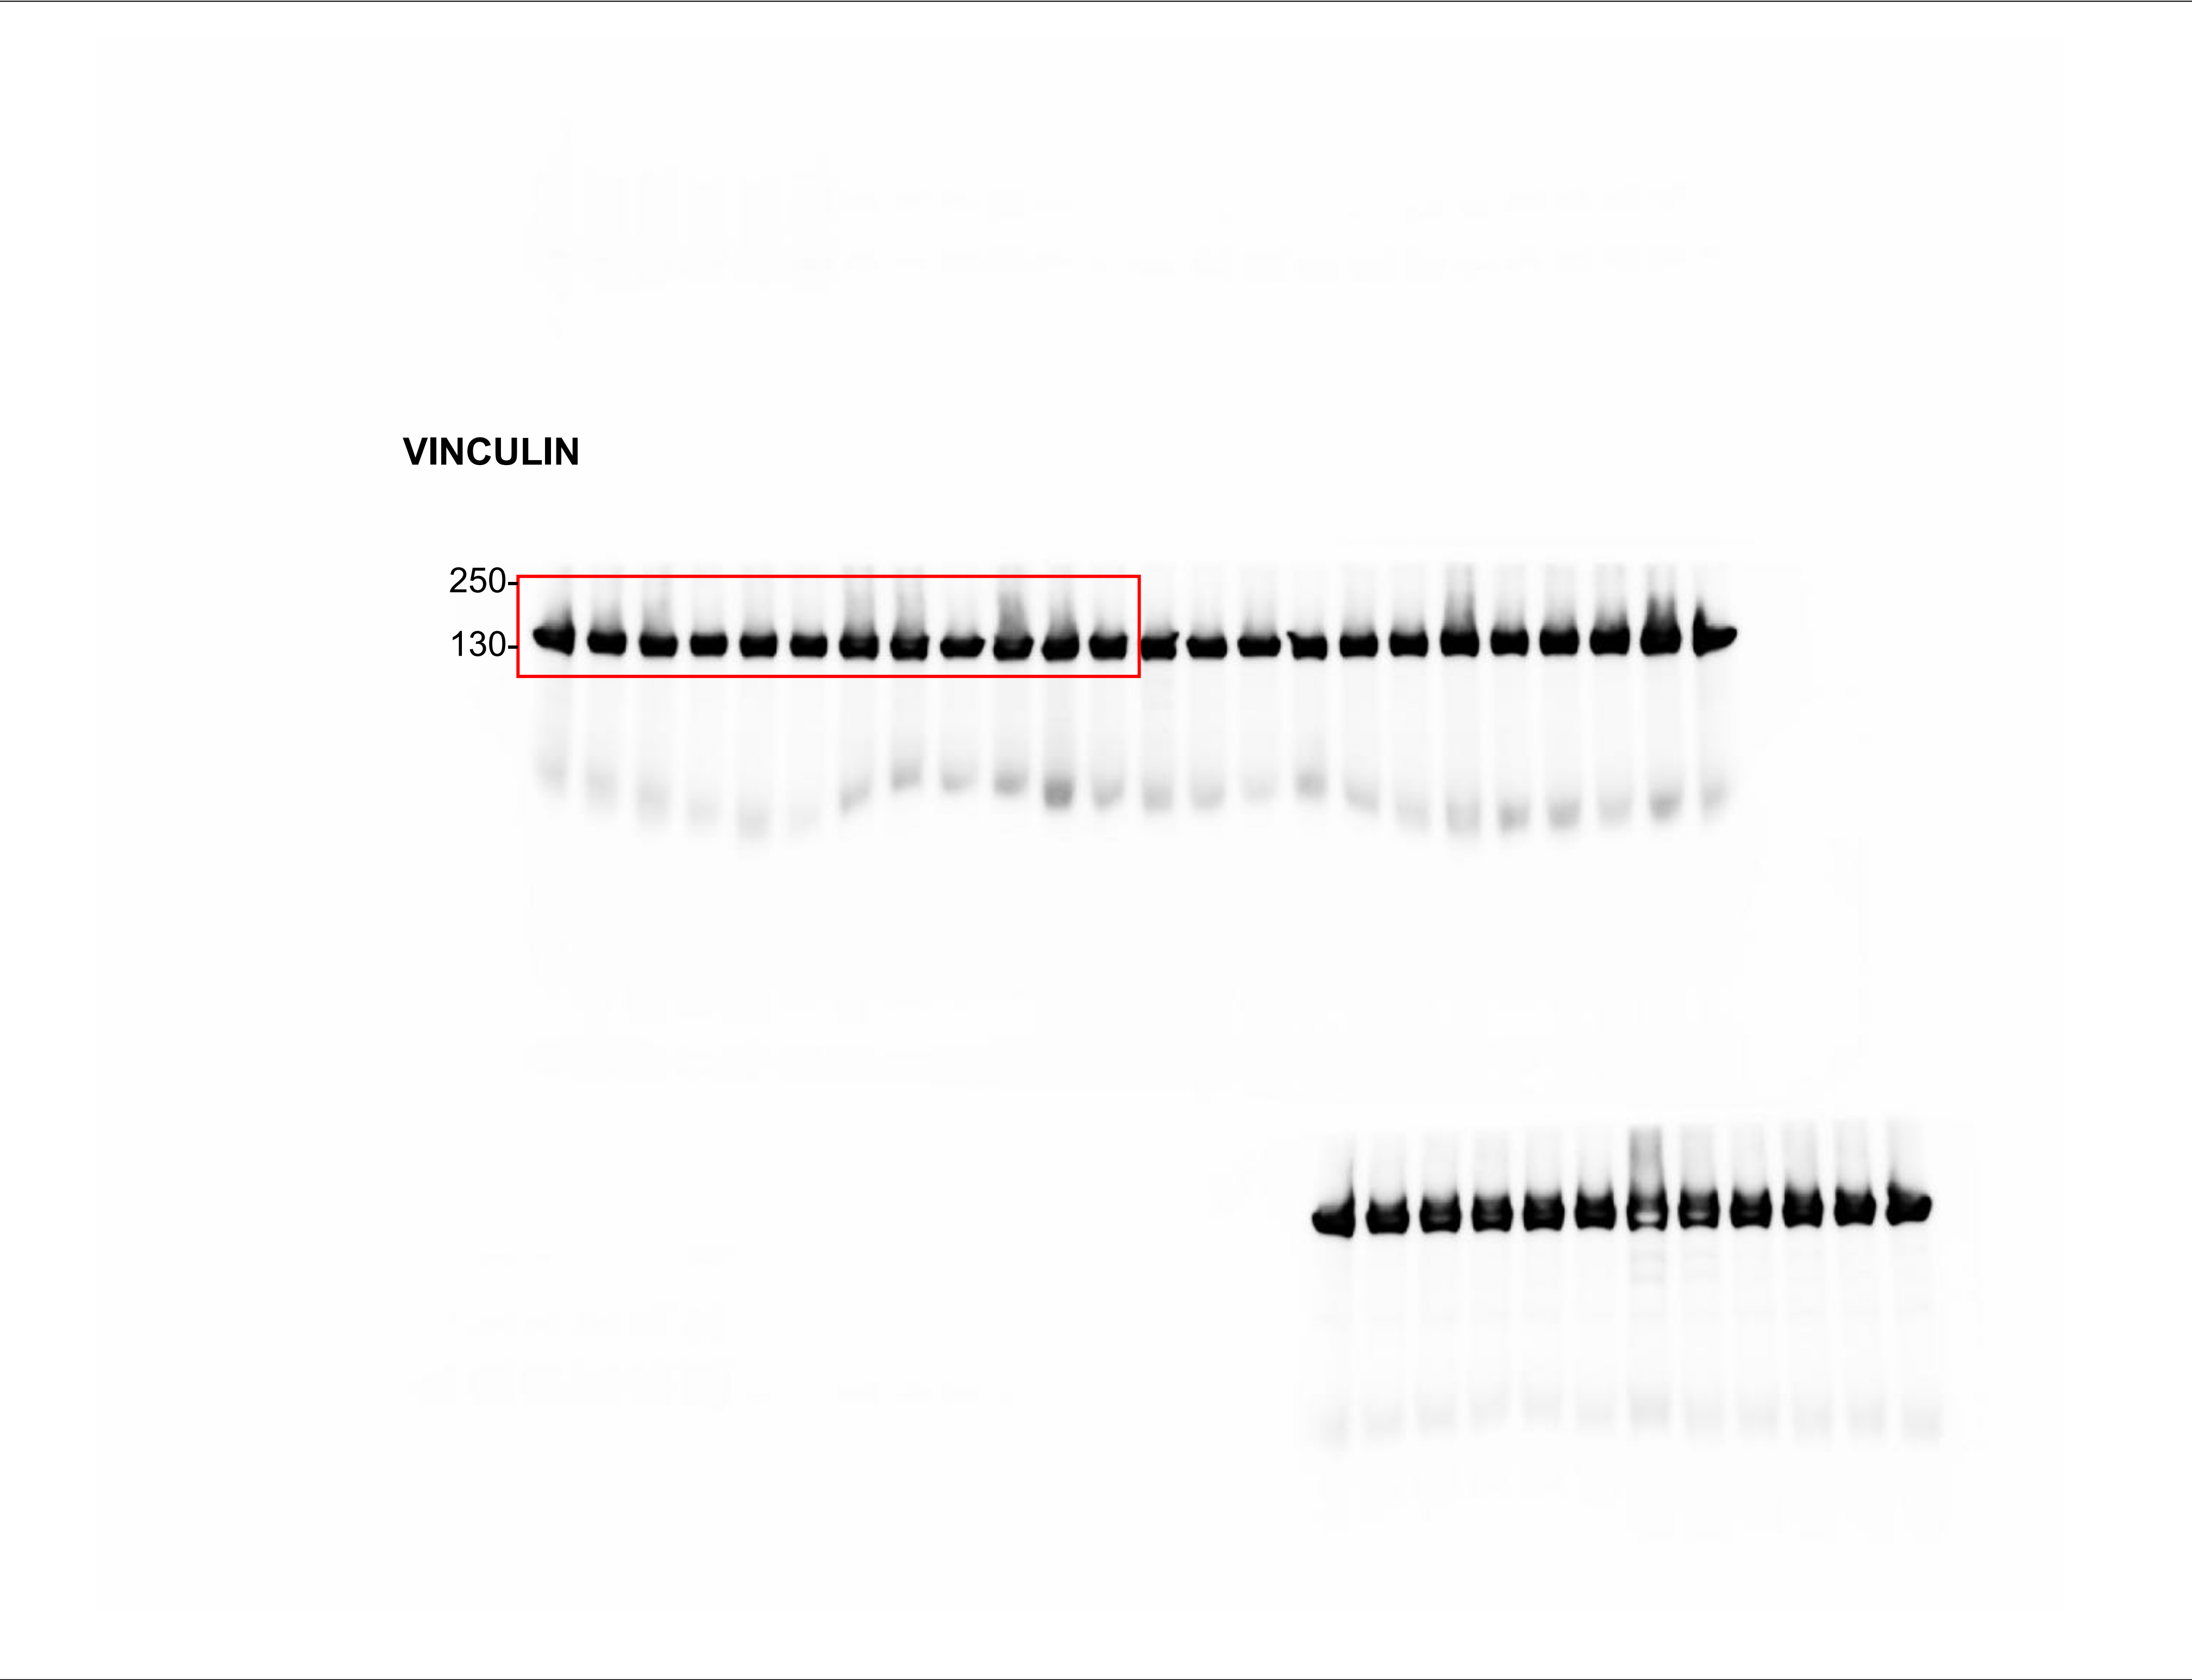



Figure 1e

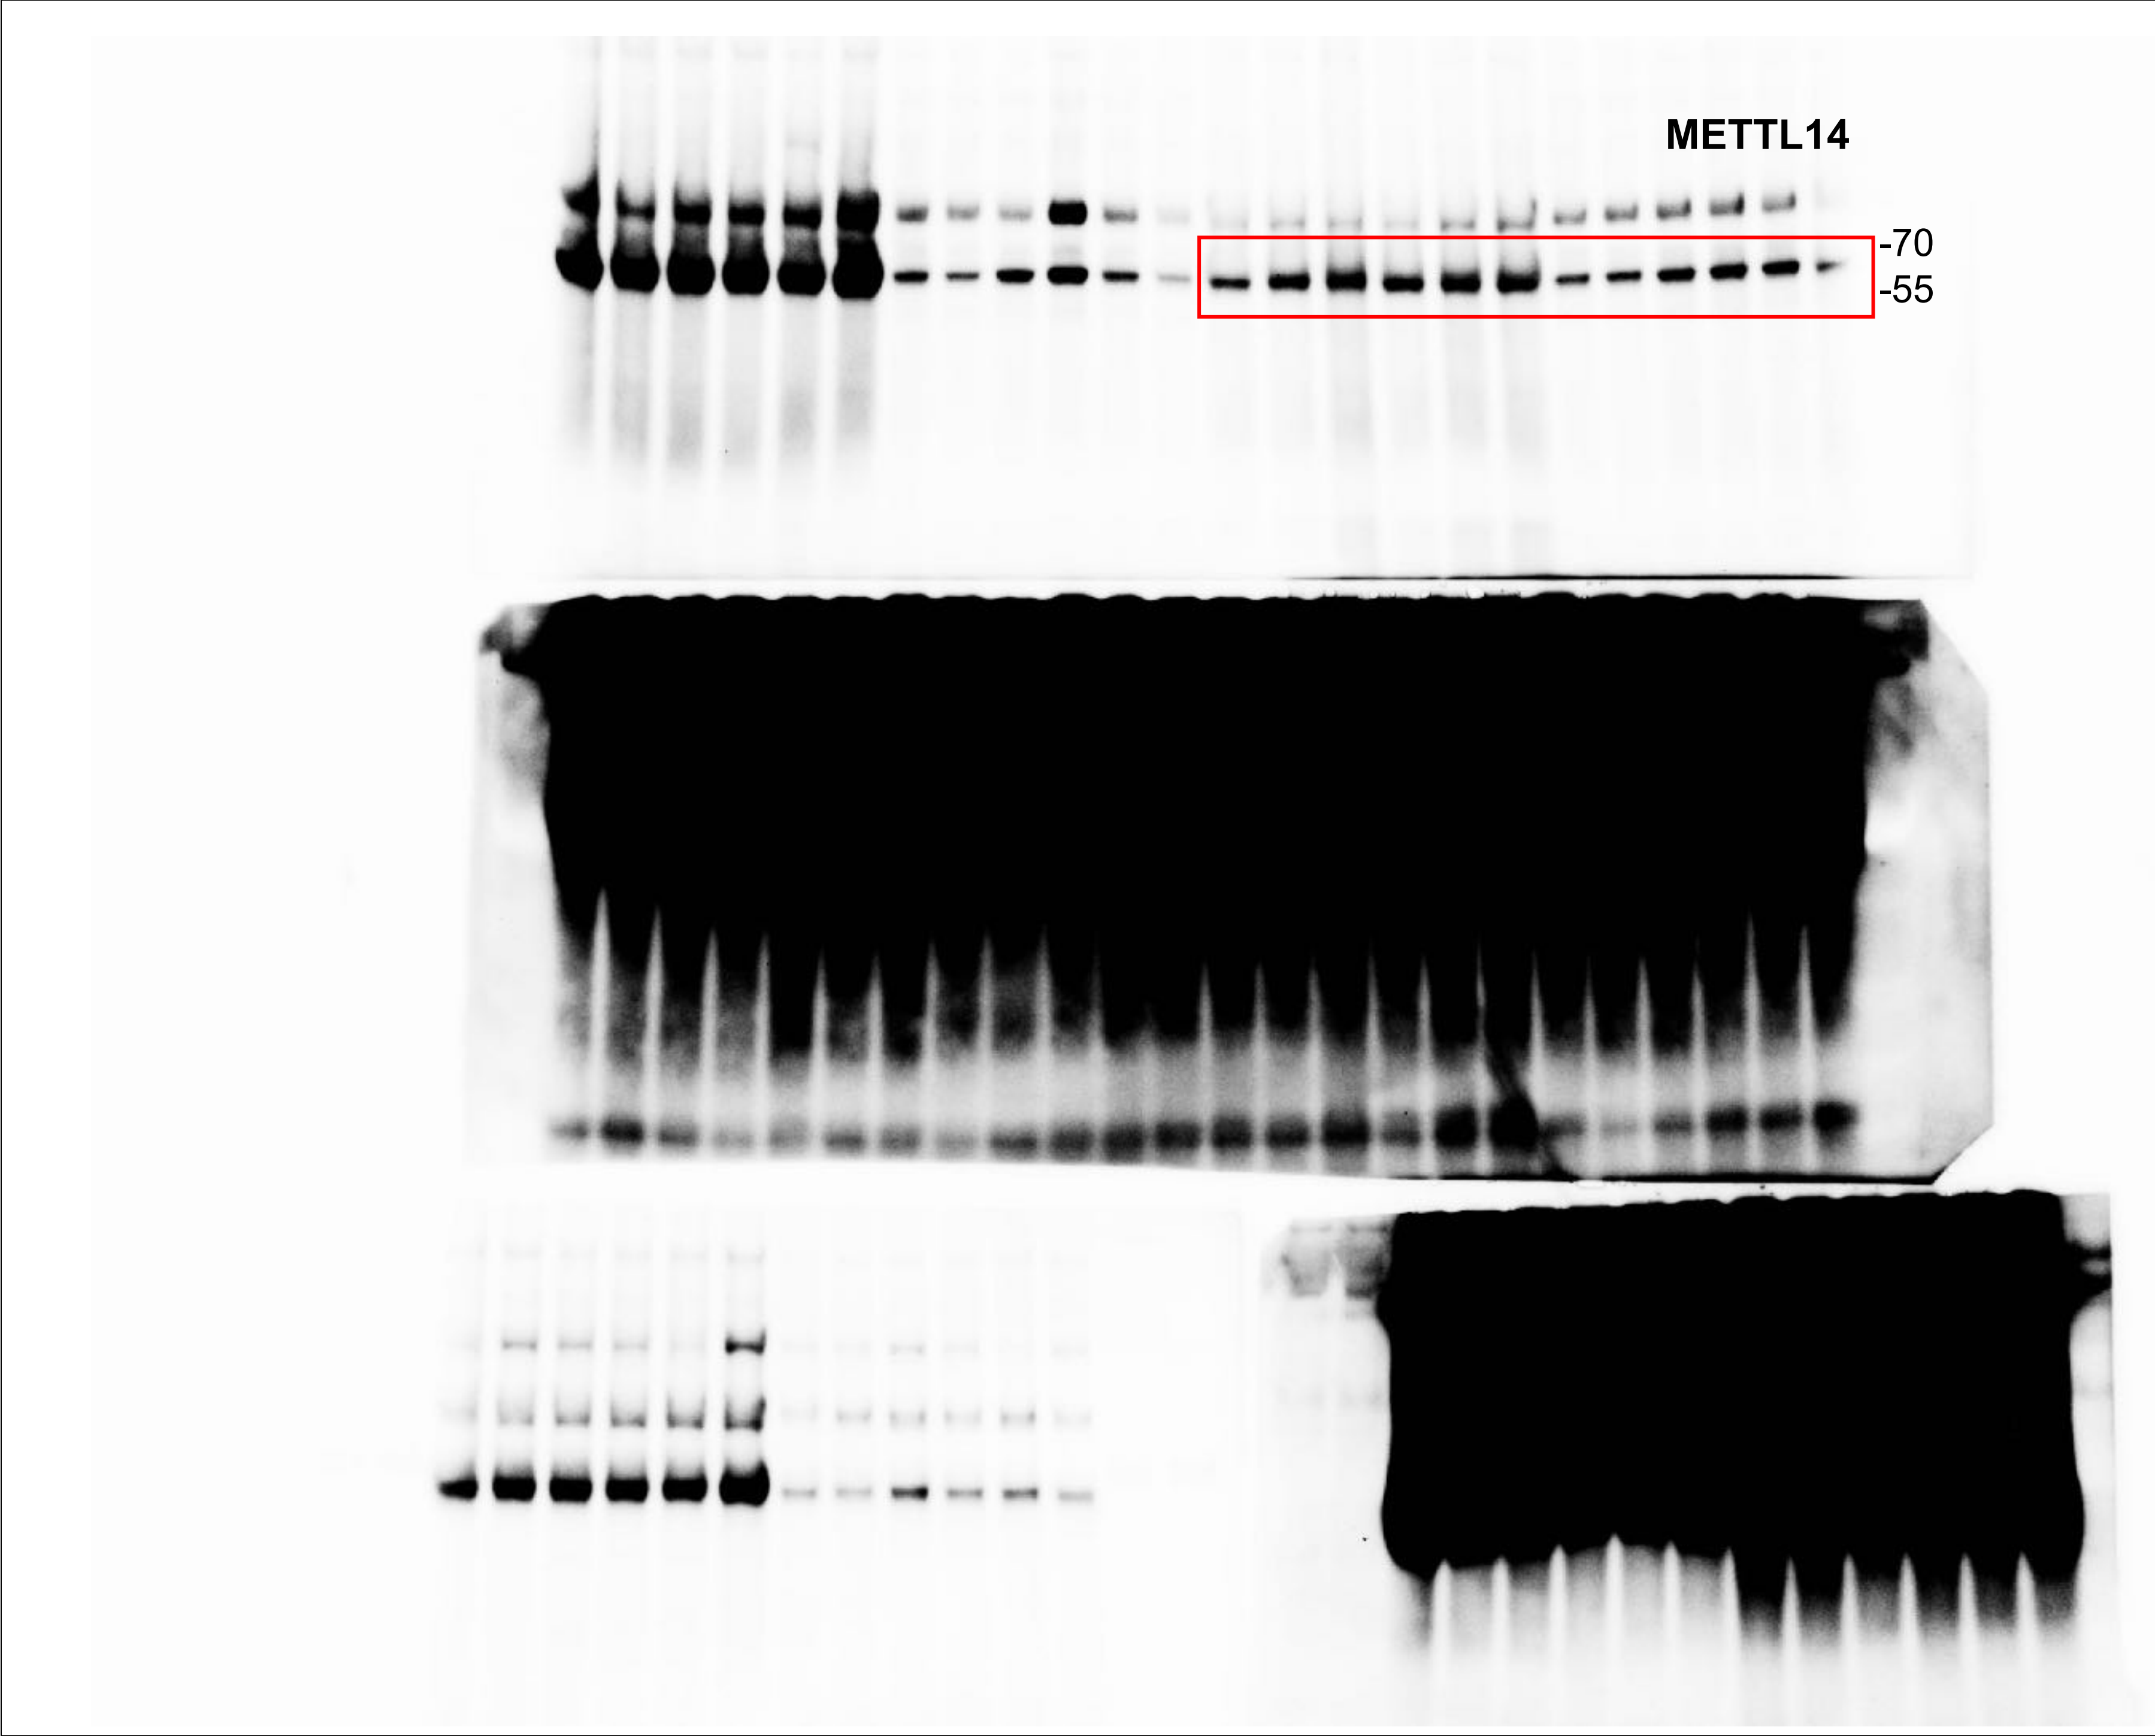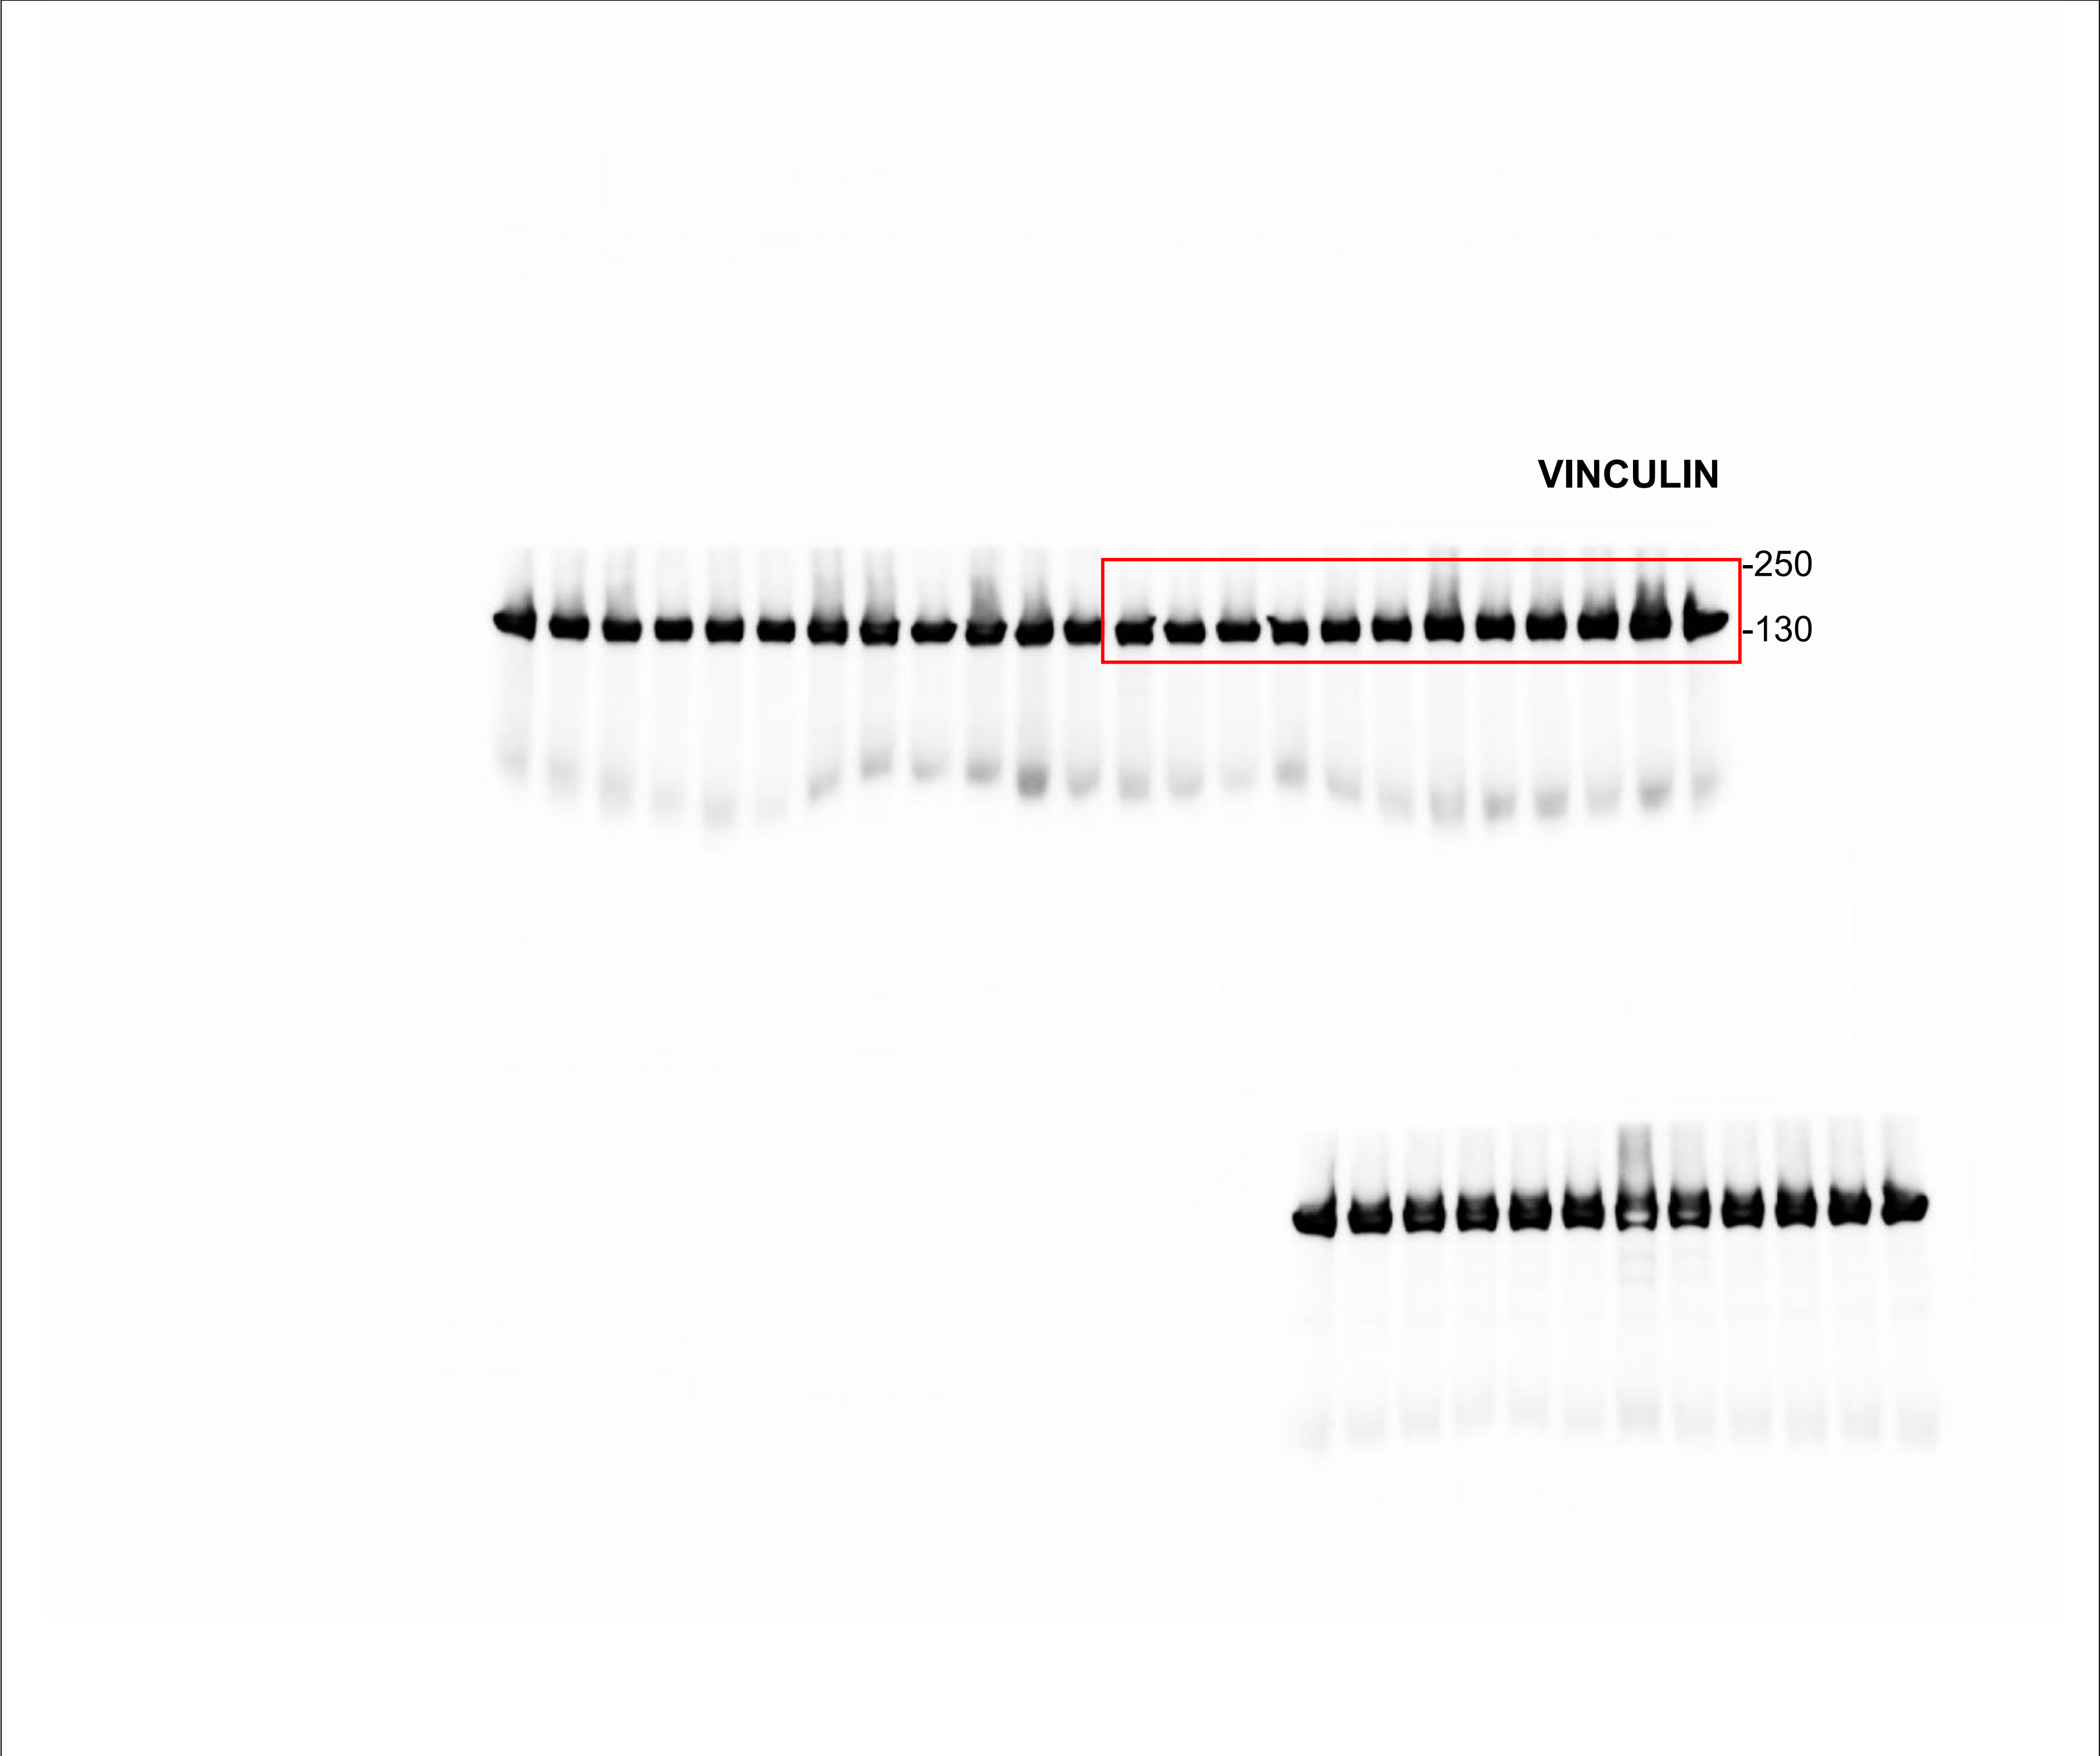

Figure 1e

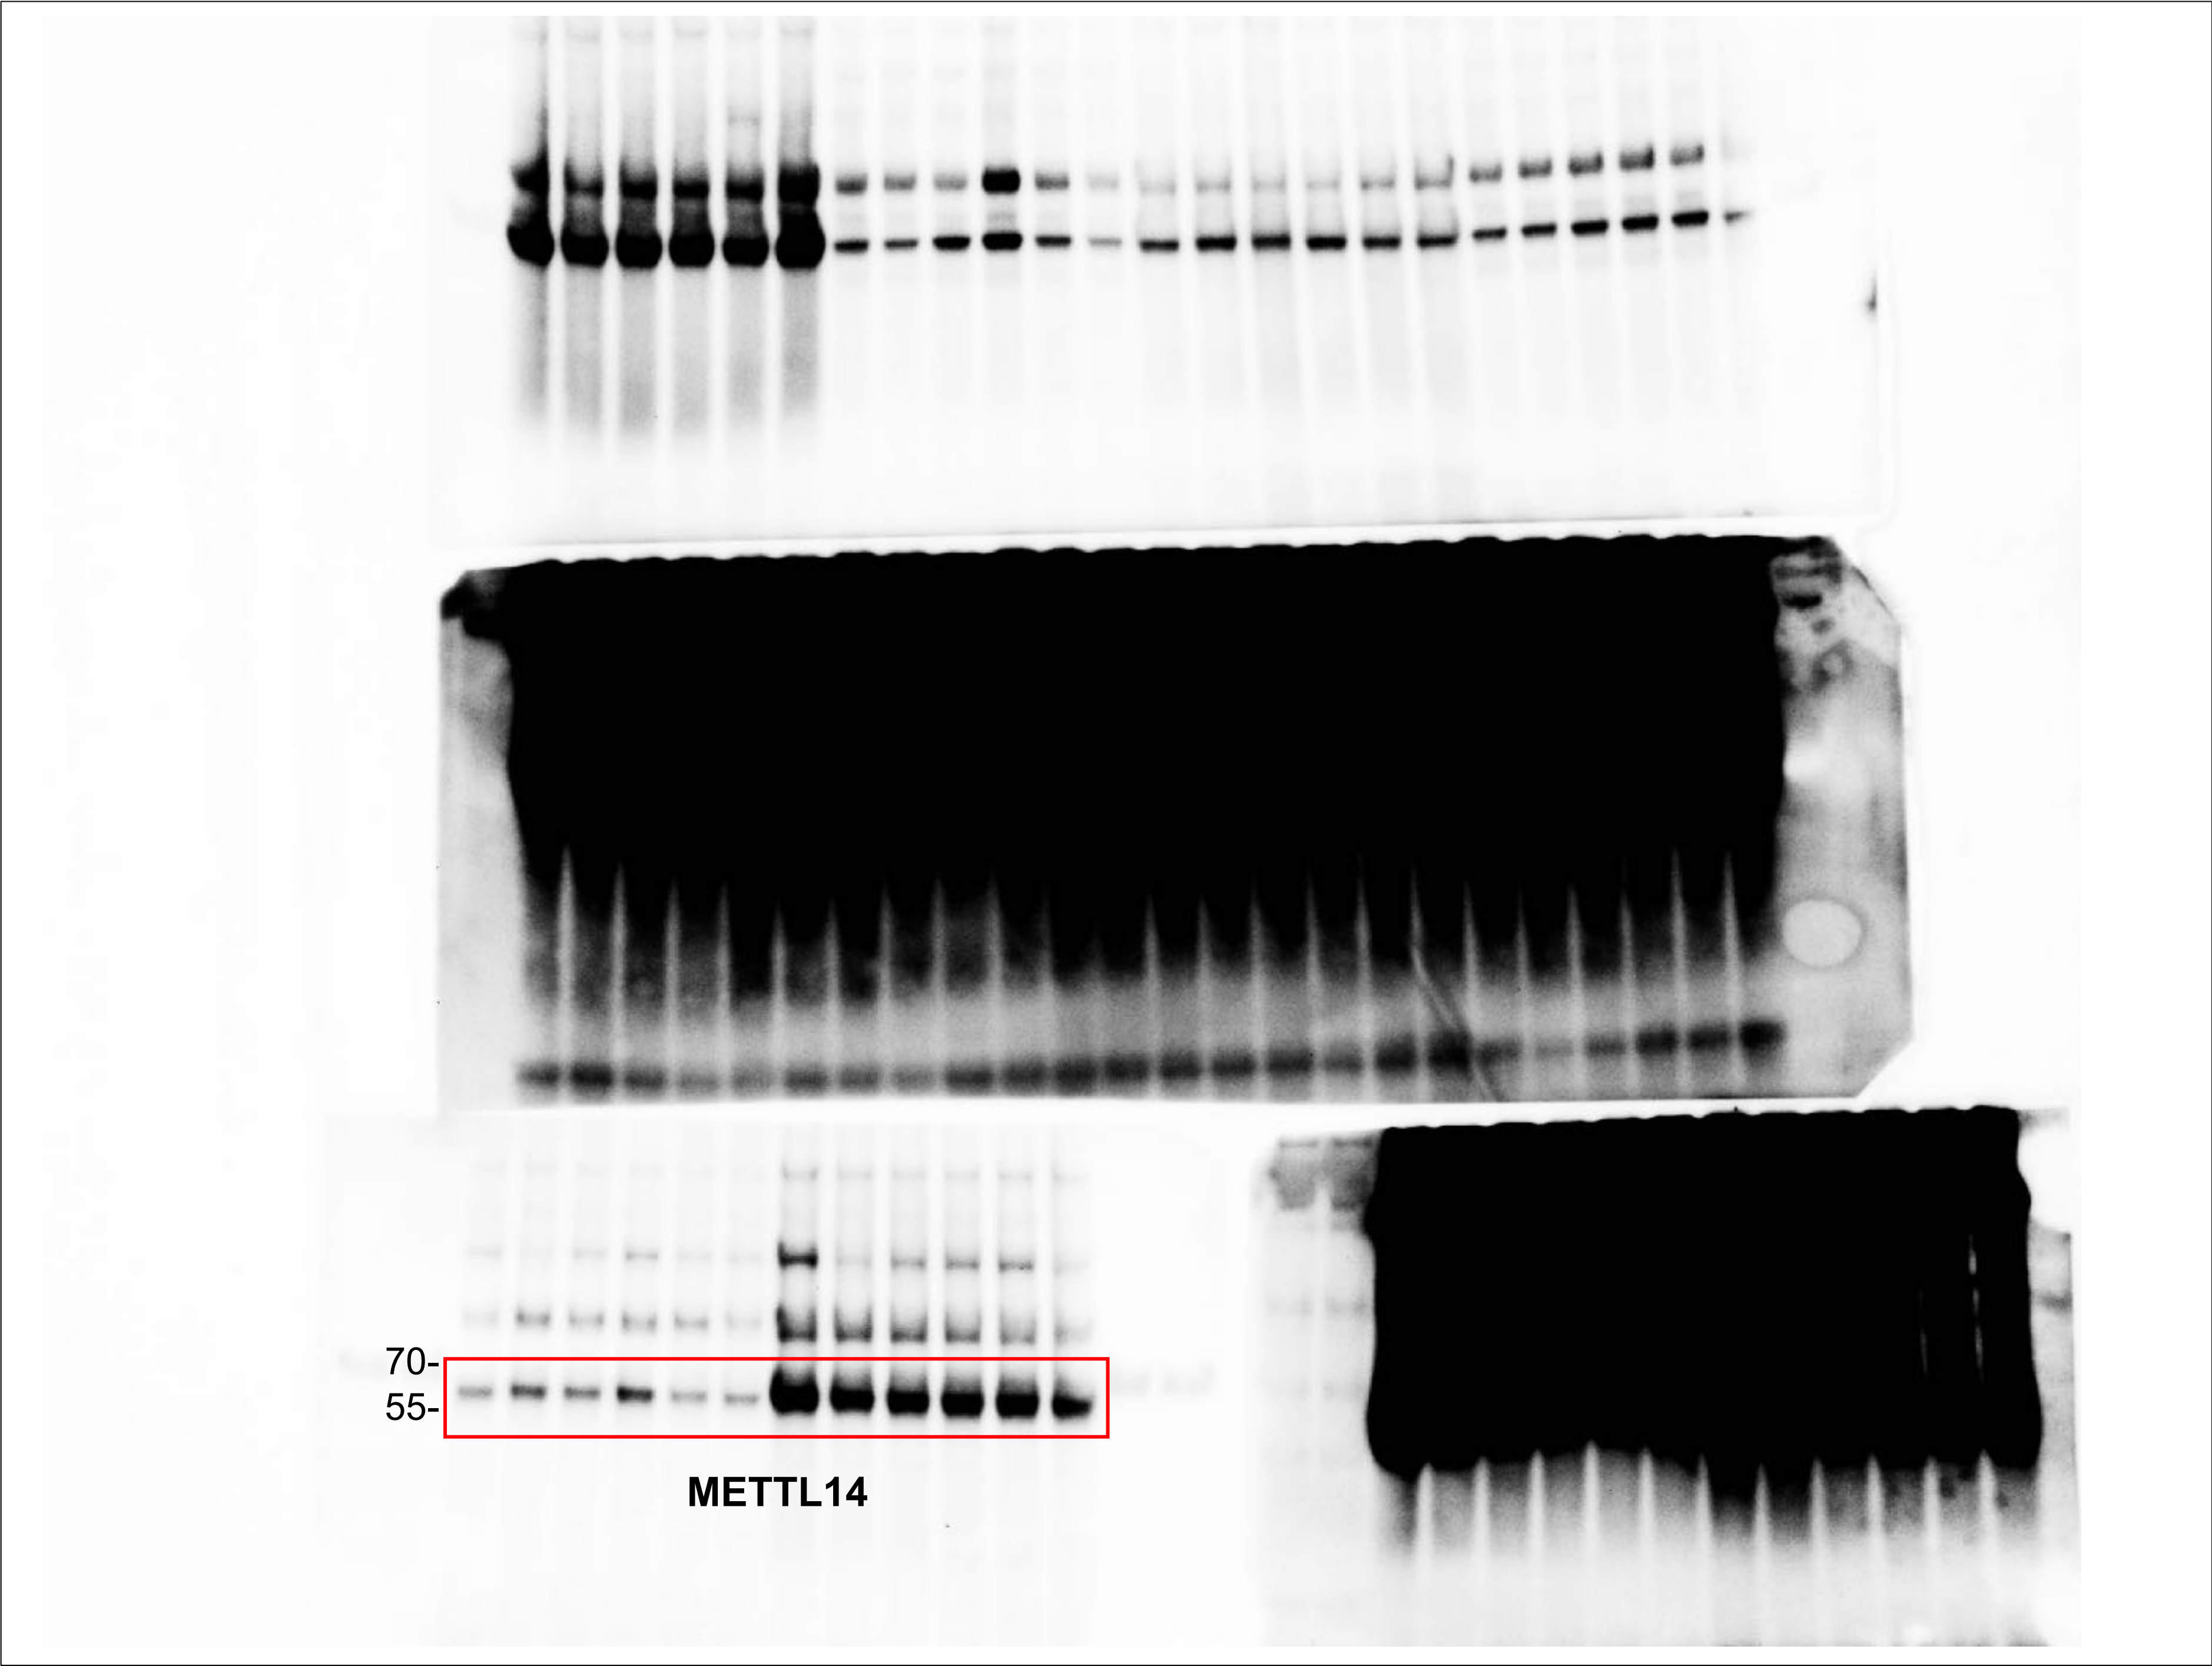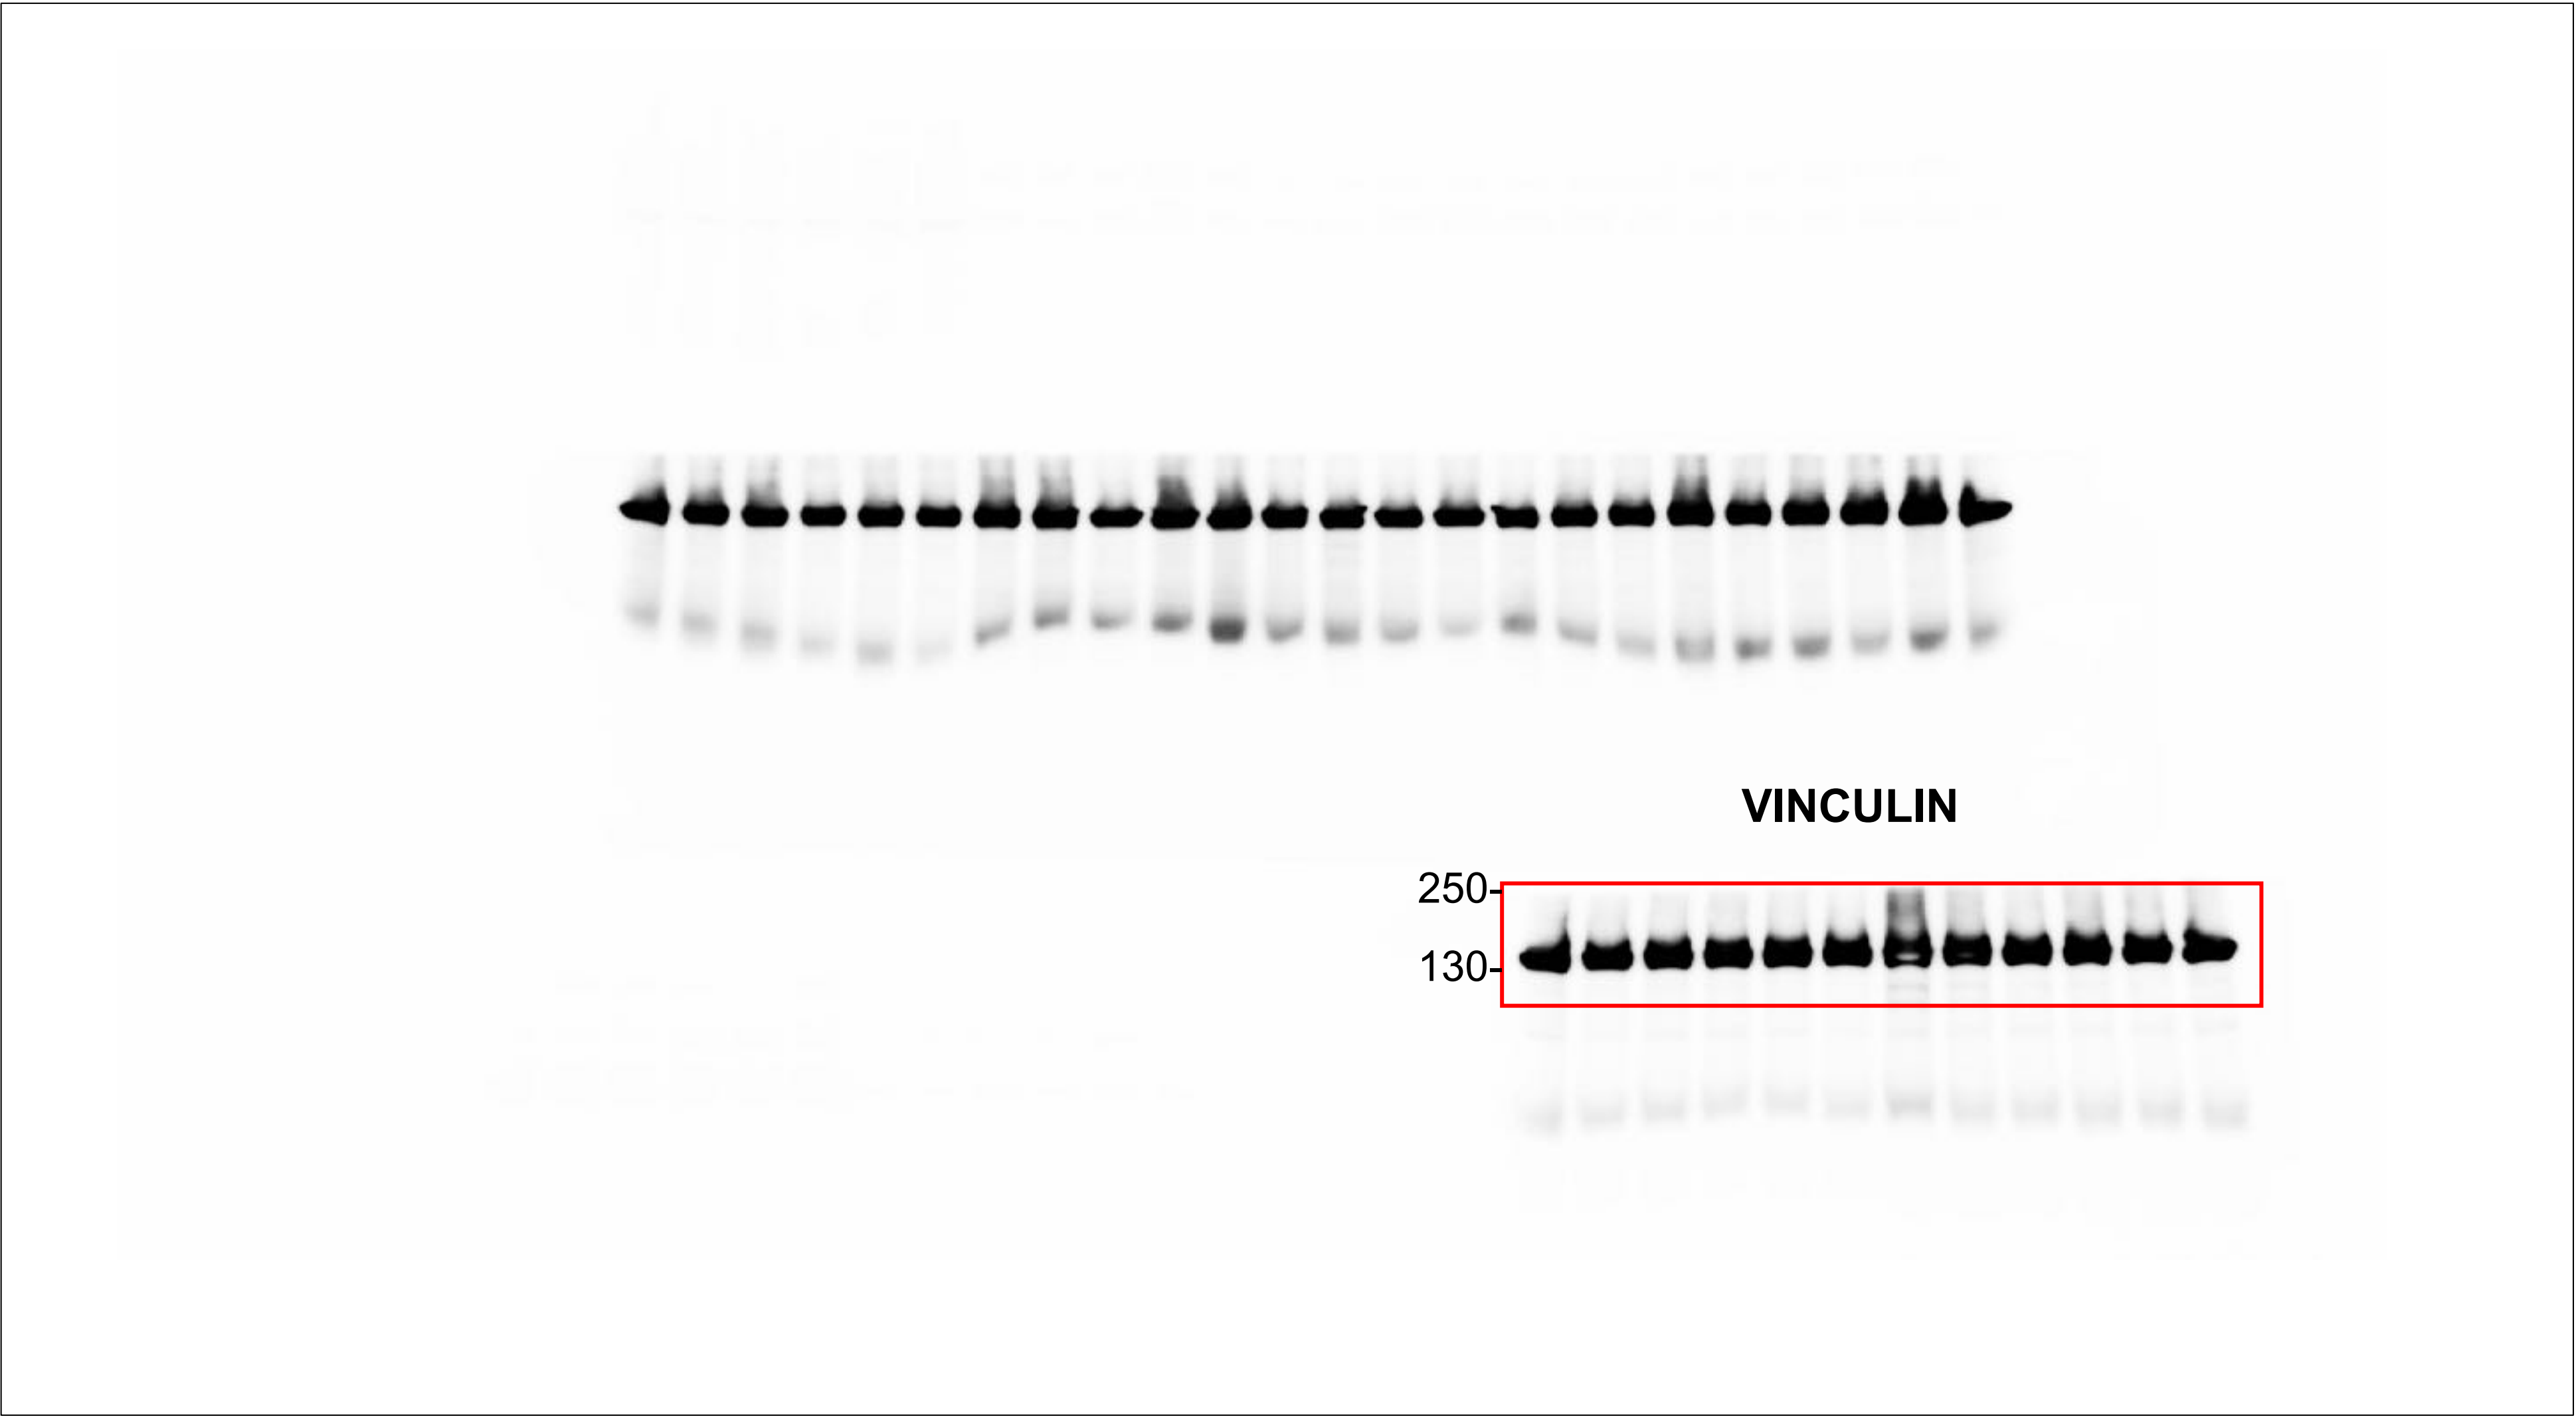



Figure 1j

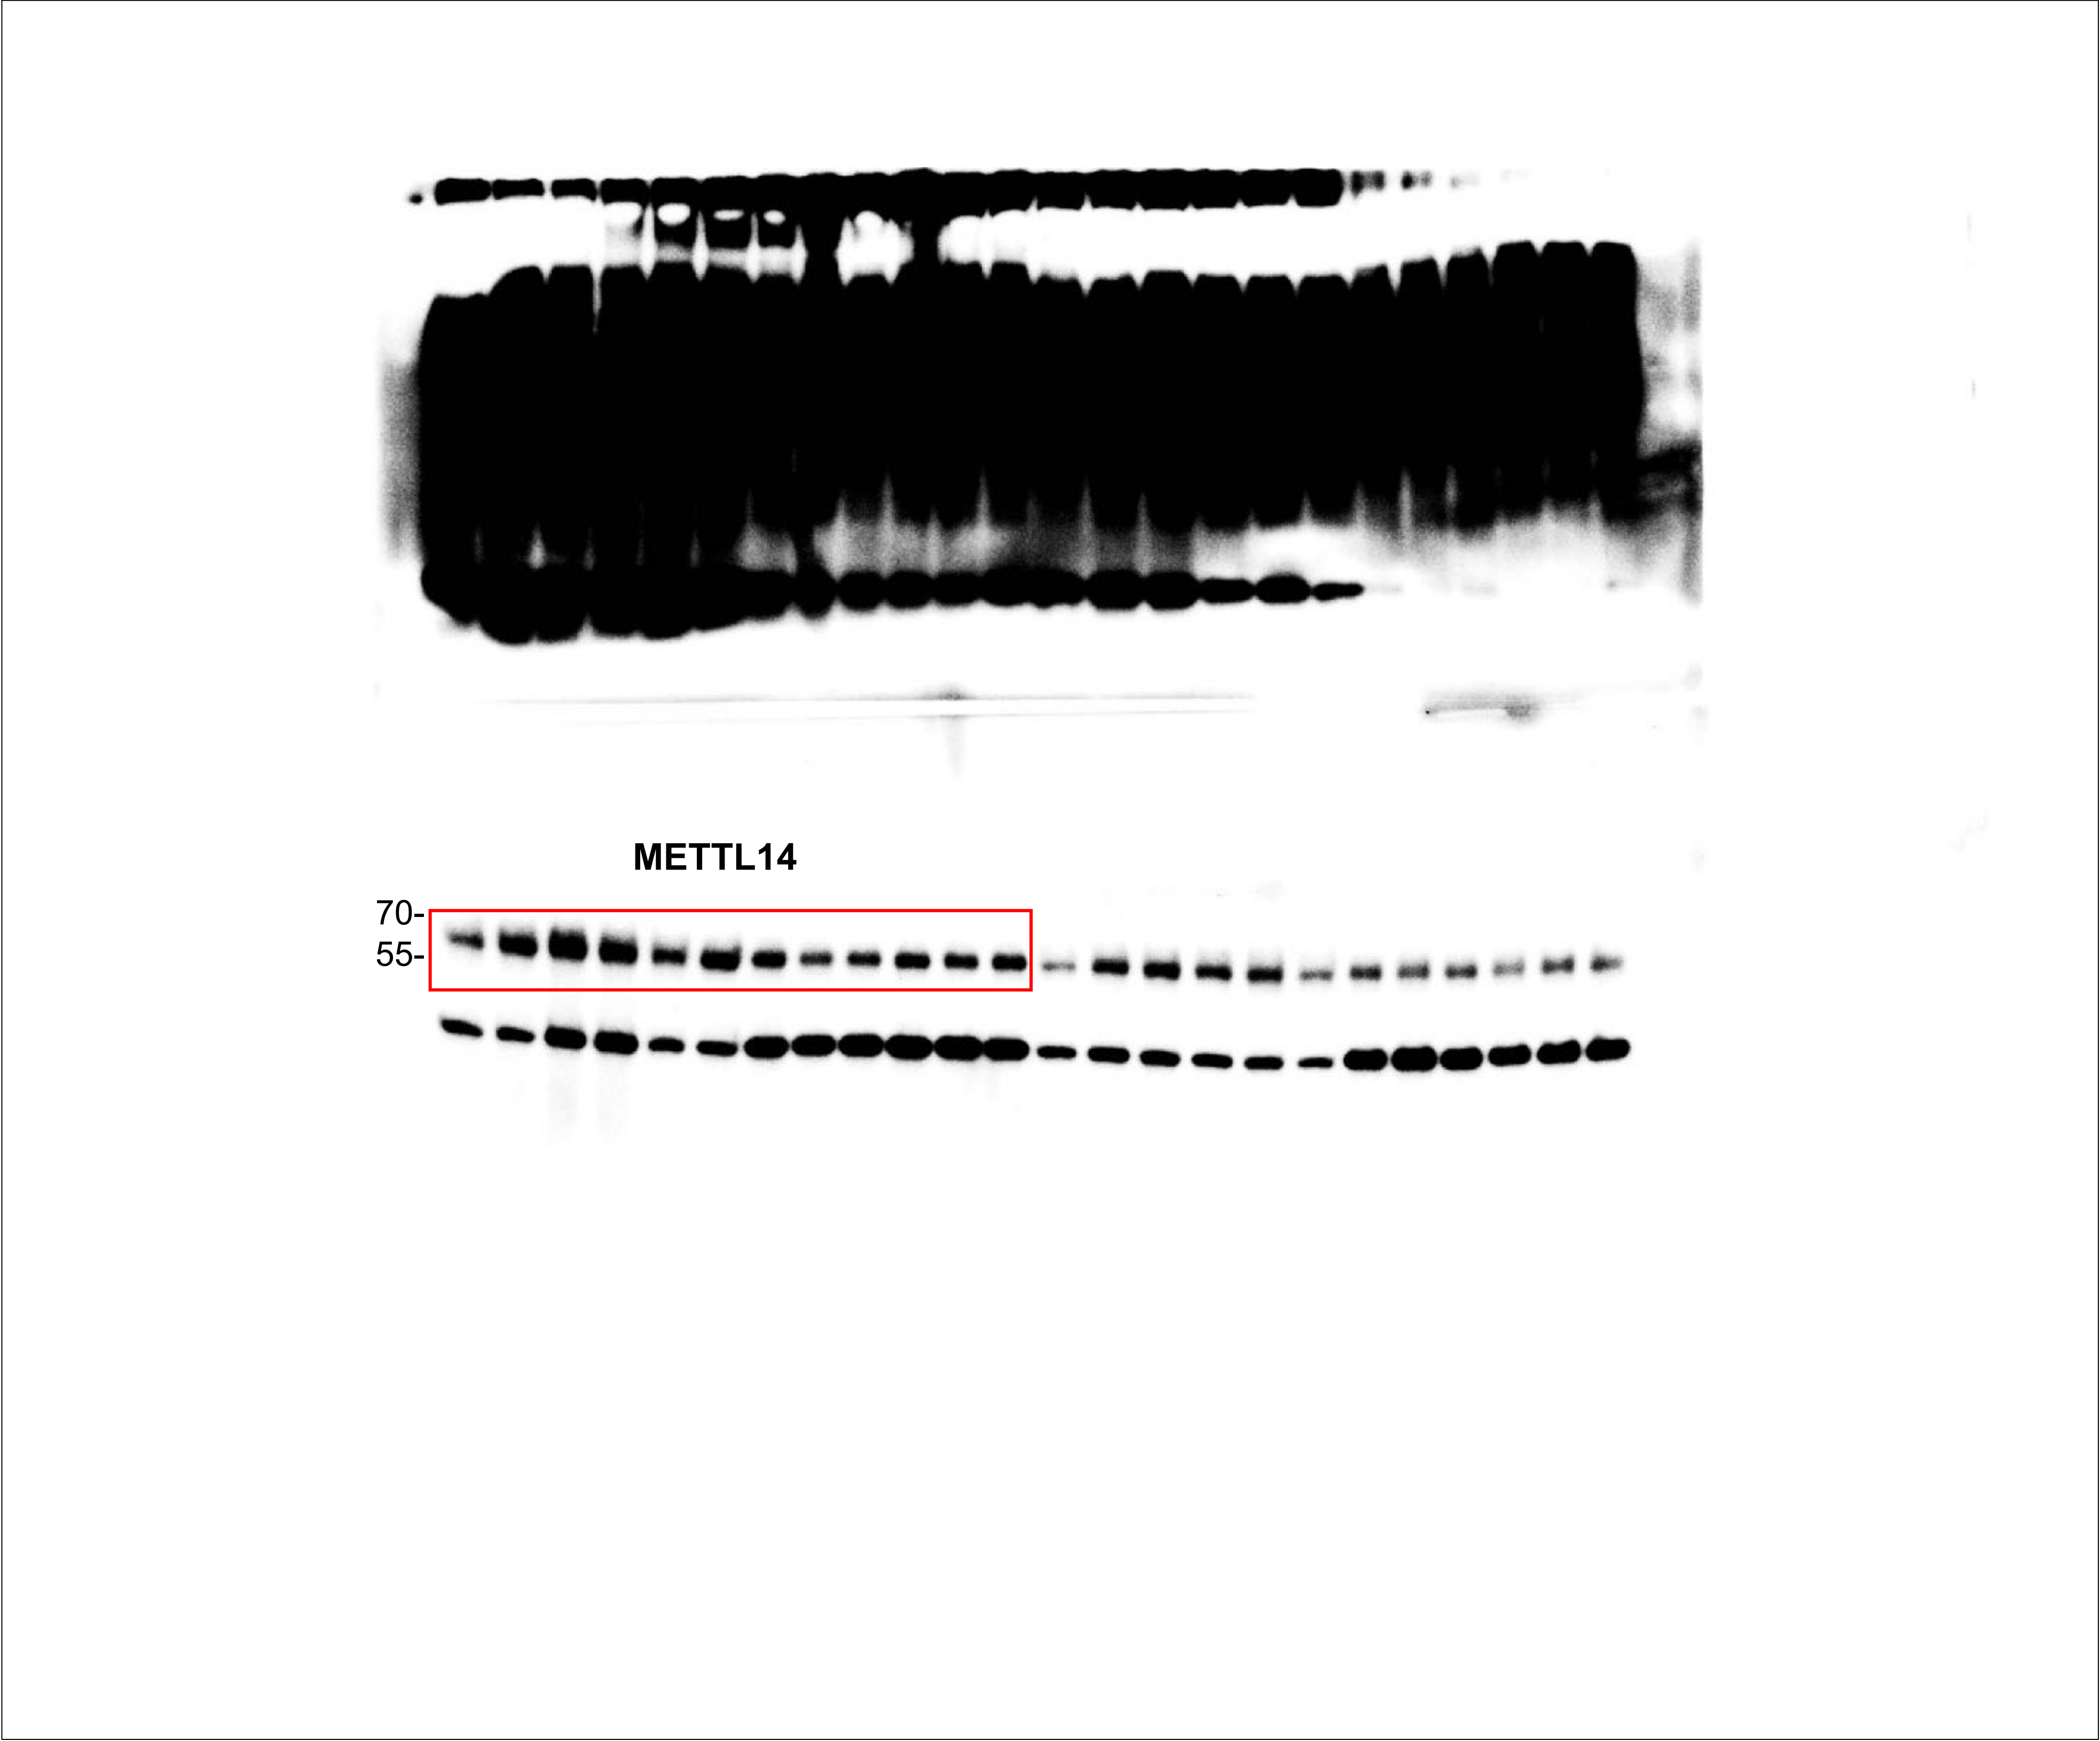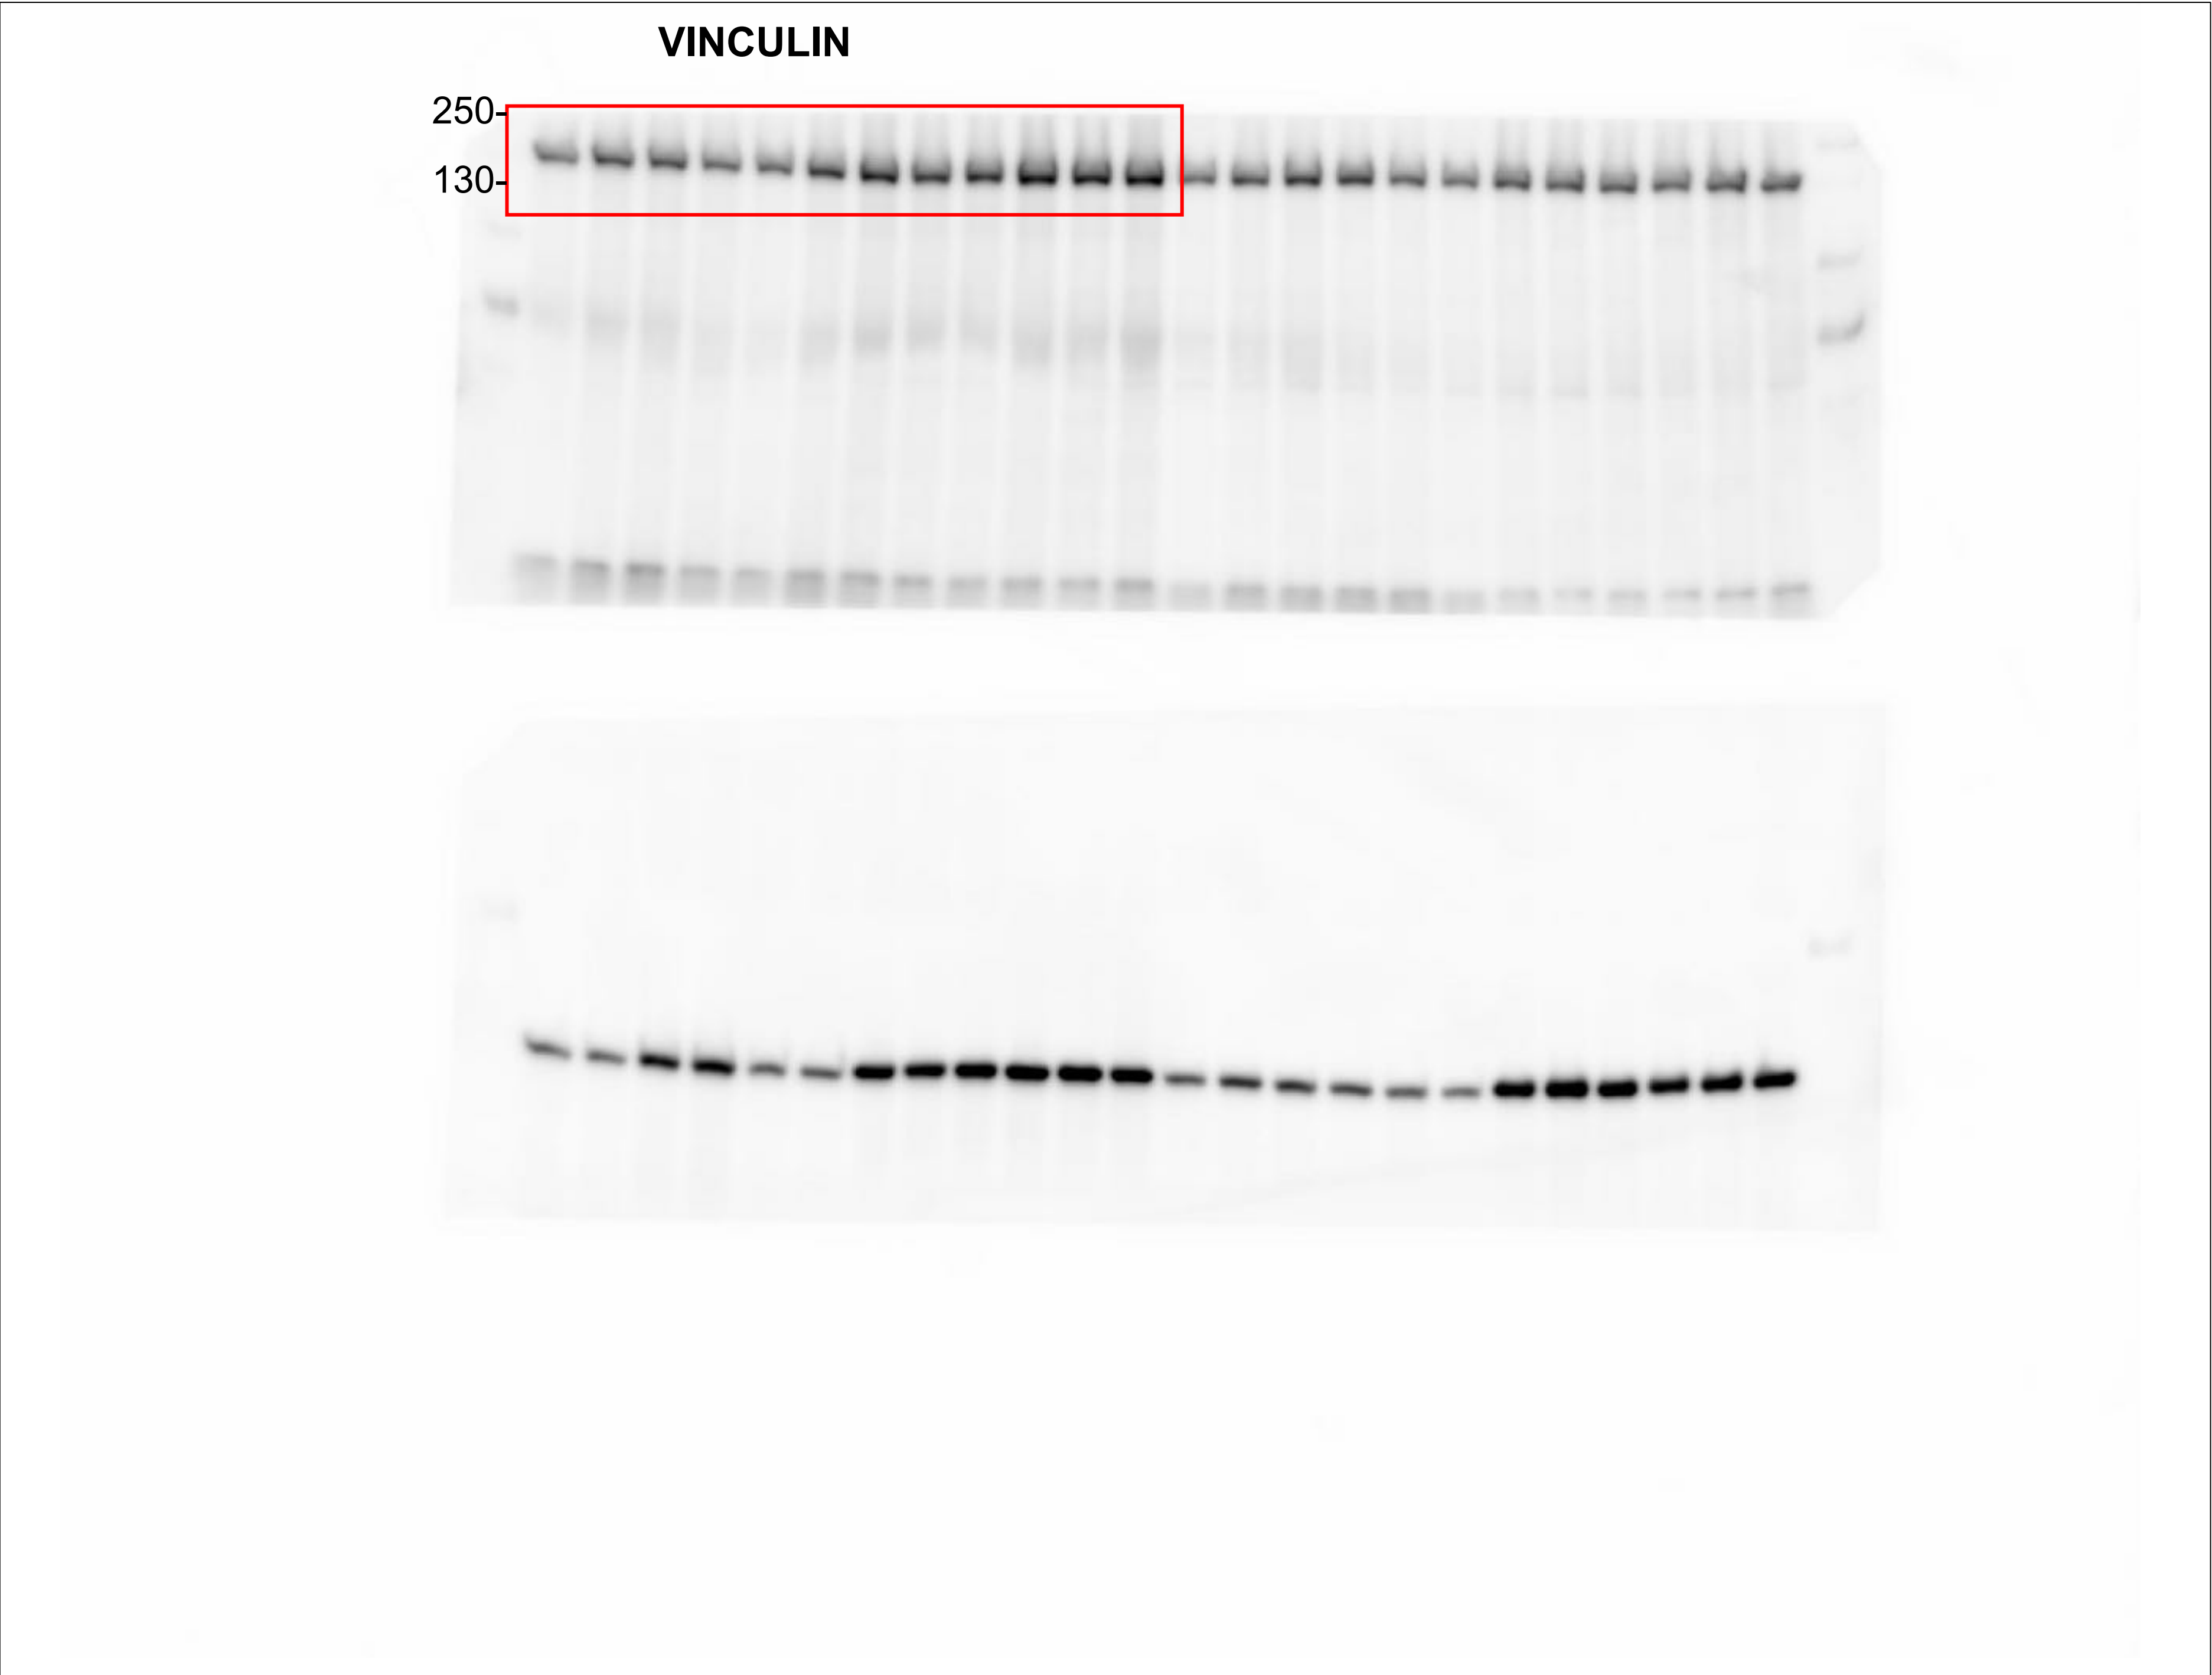

Figure 1j

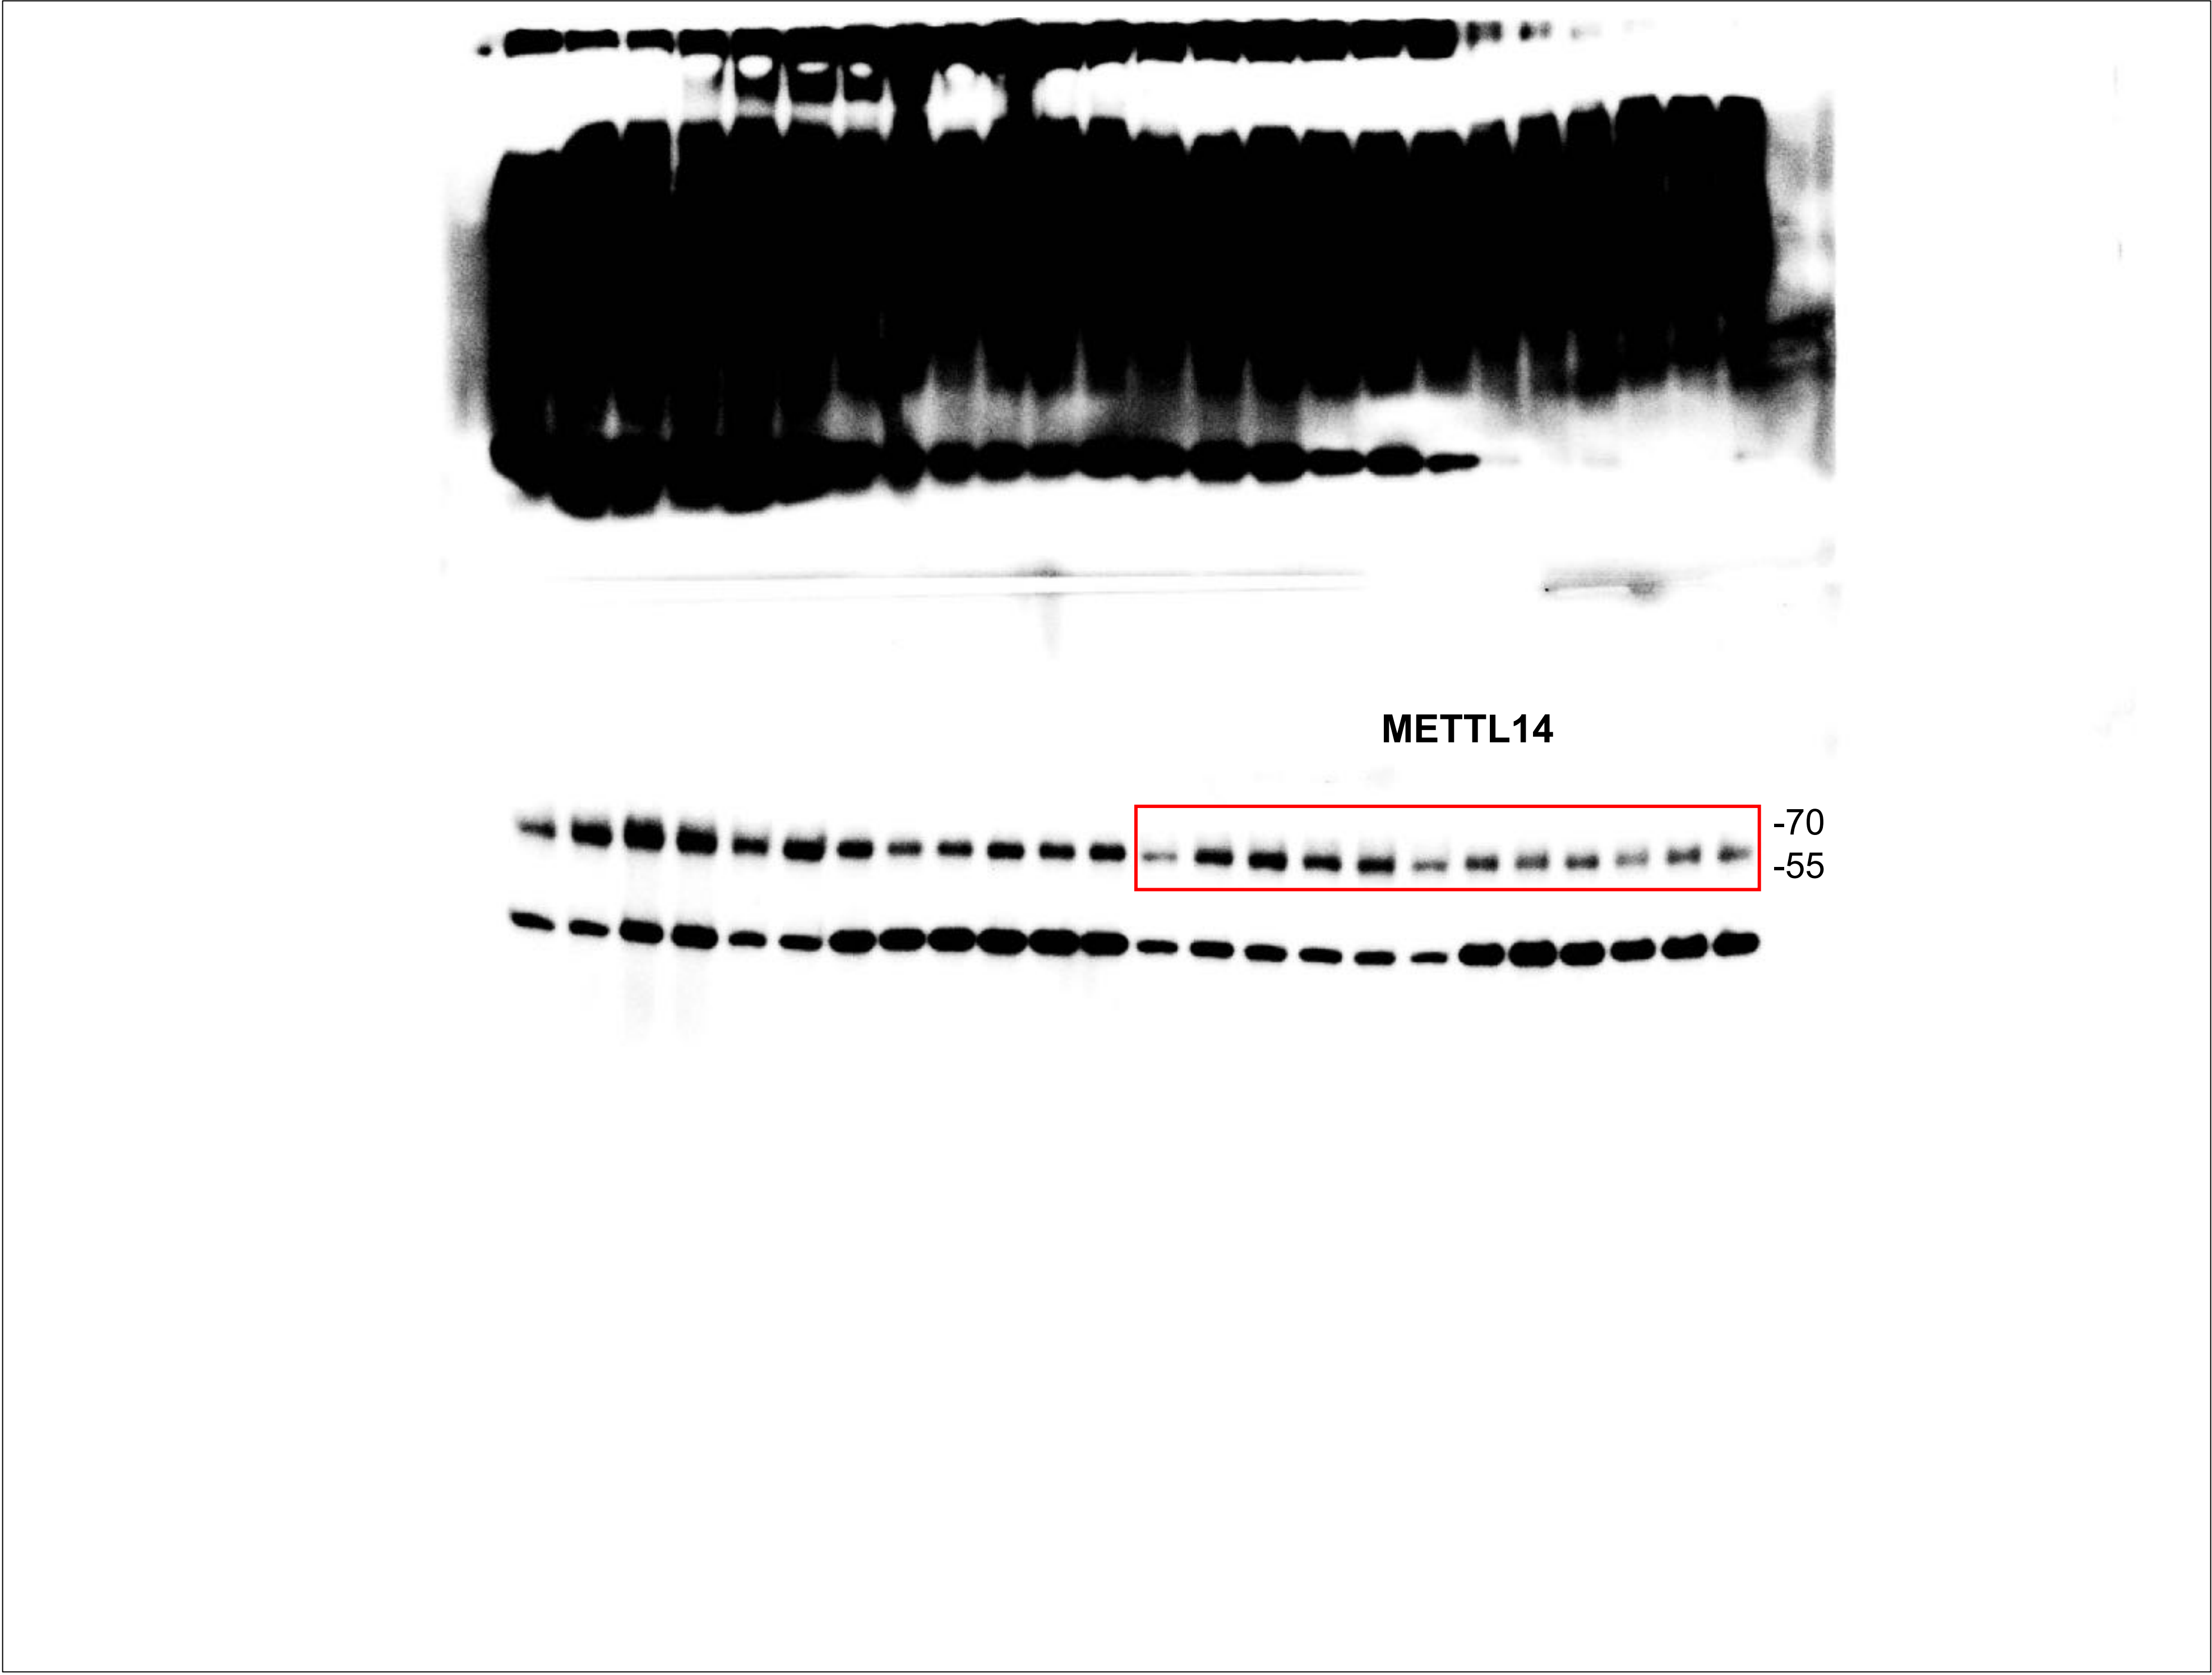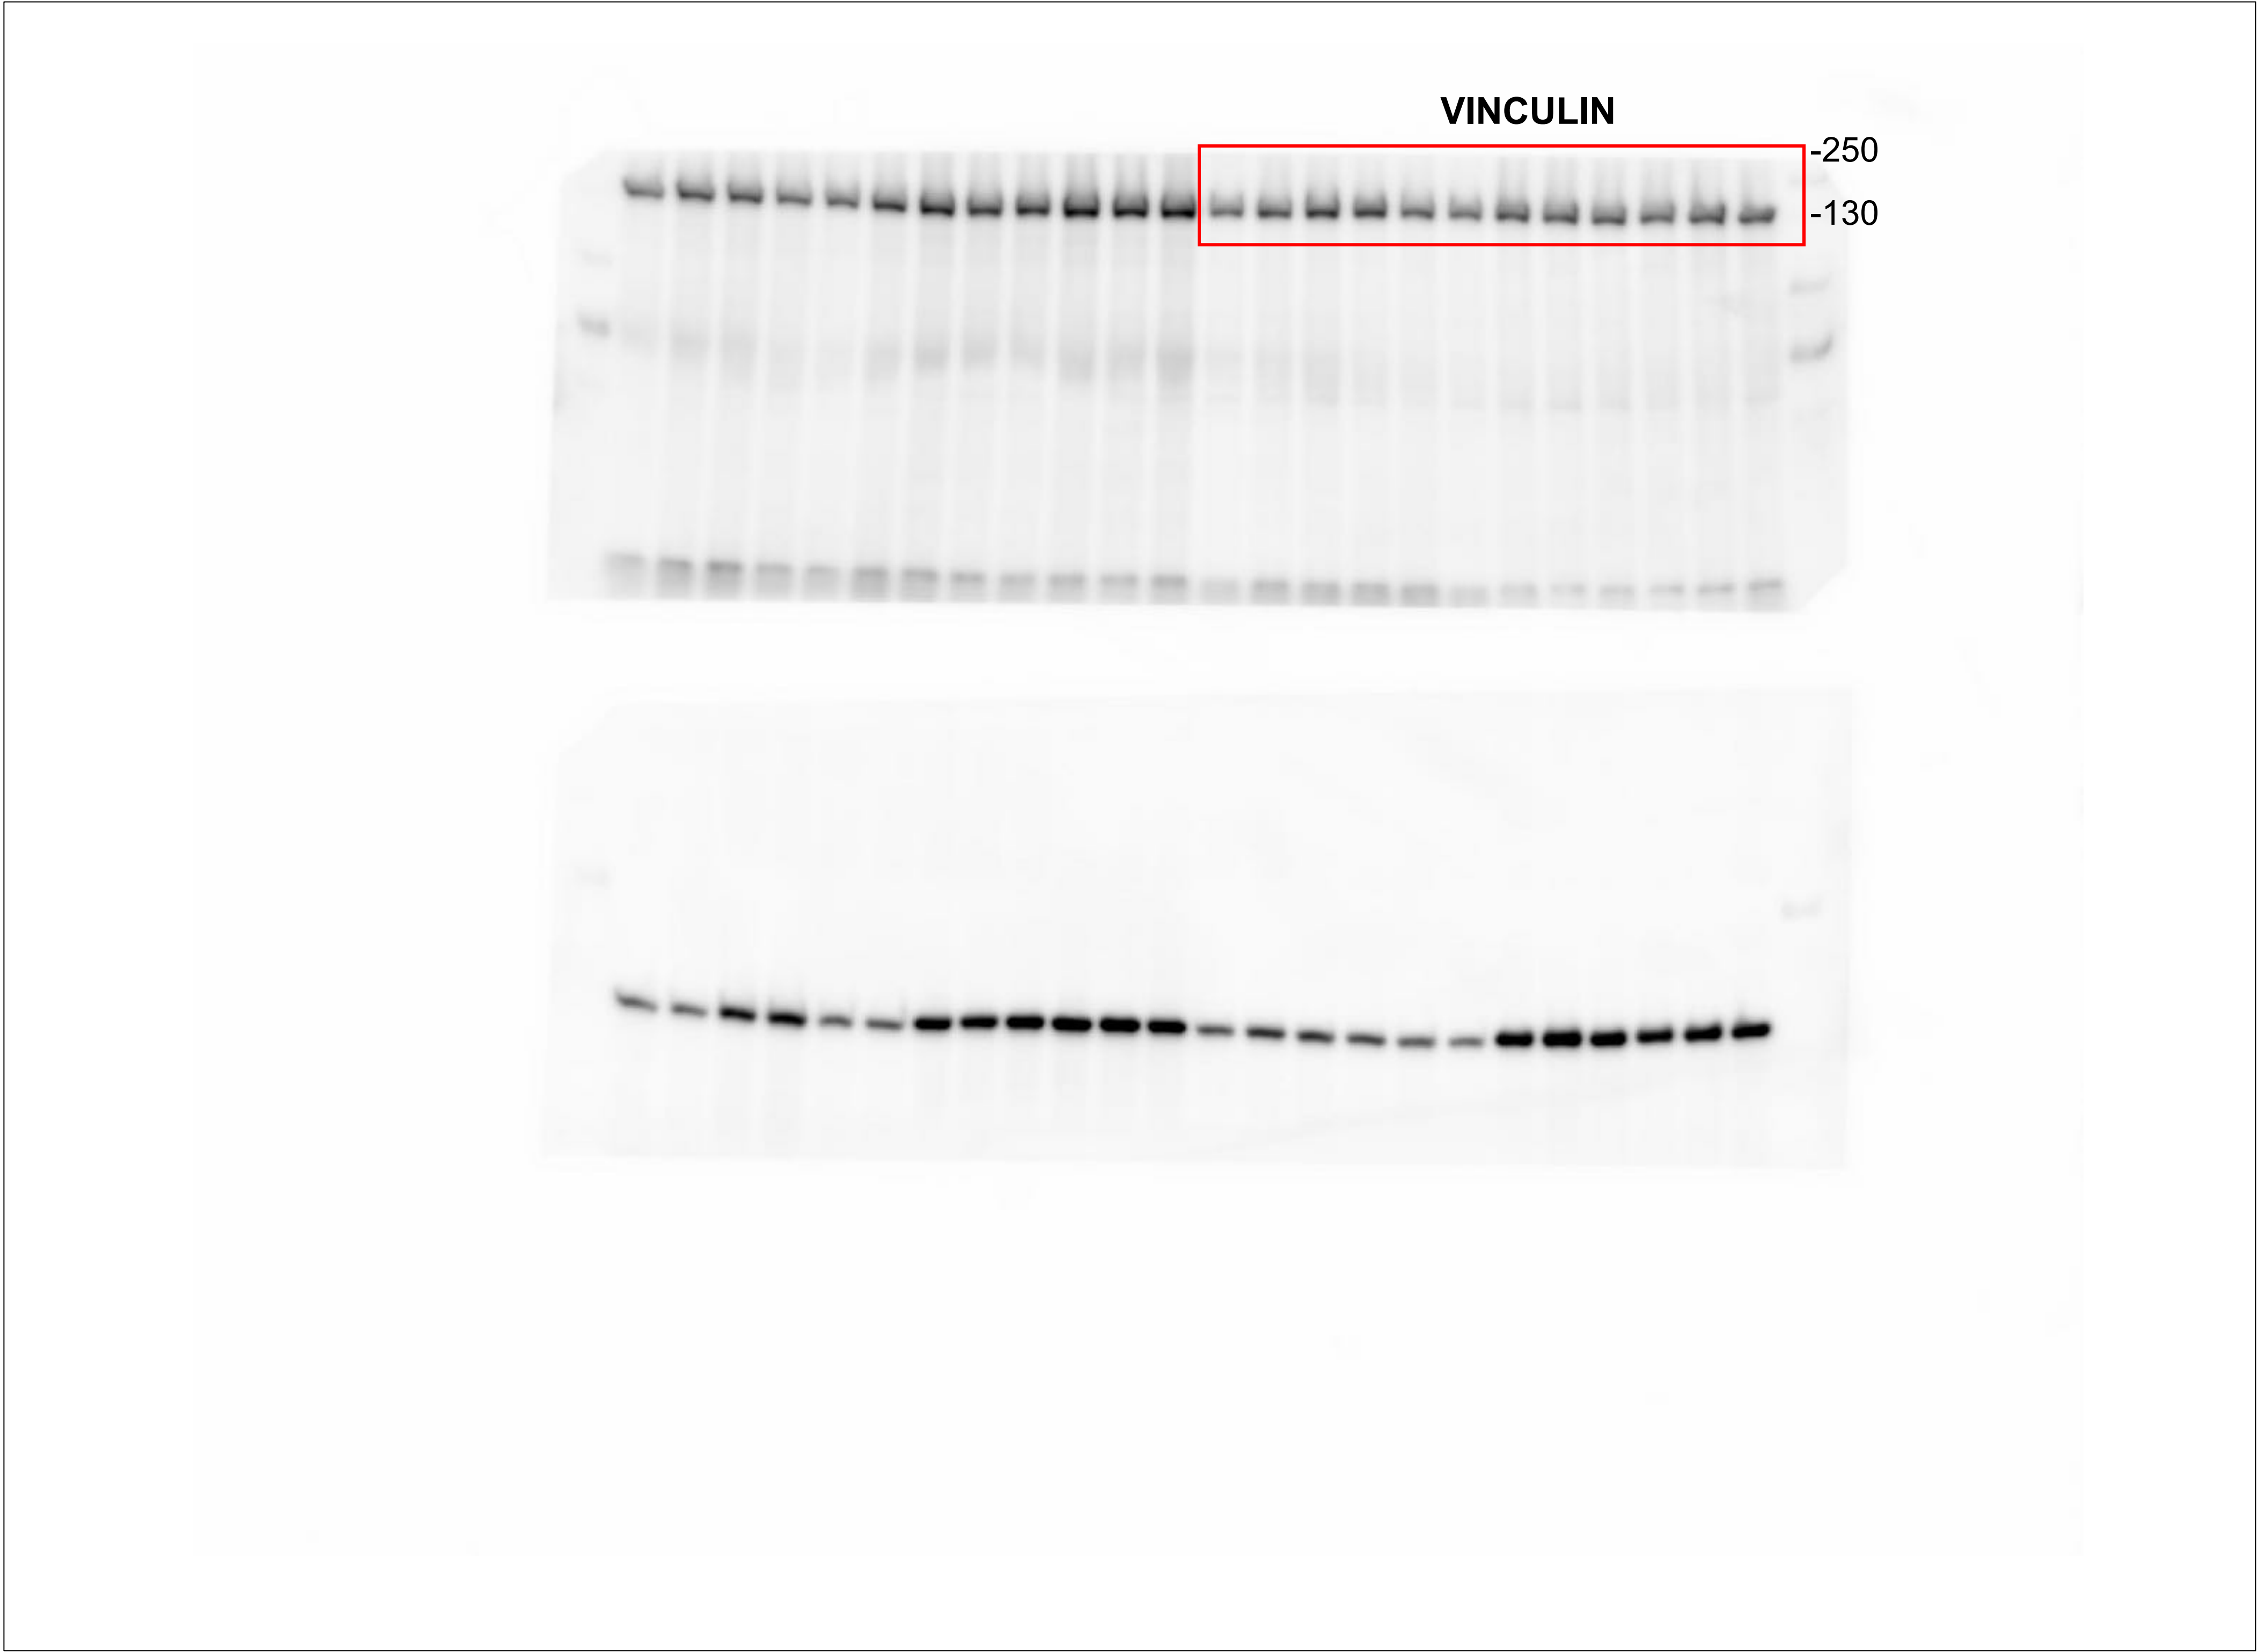



Figure 1j

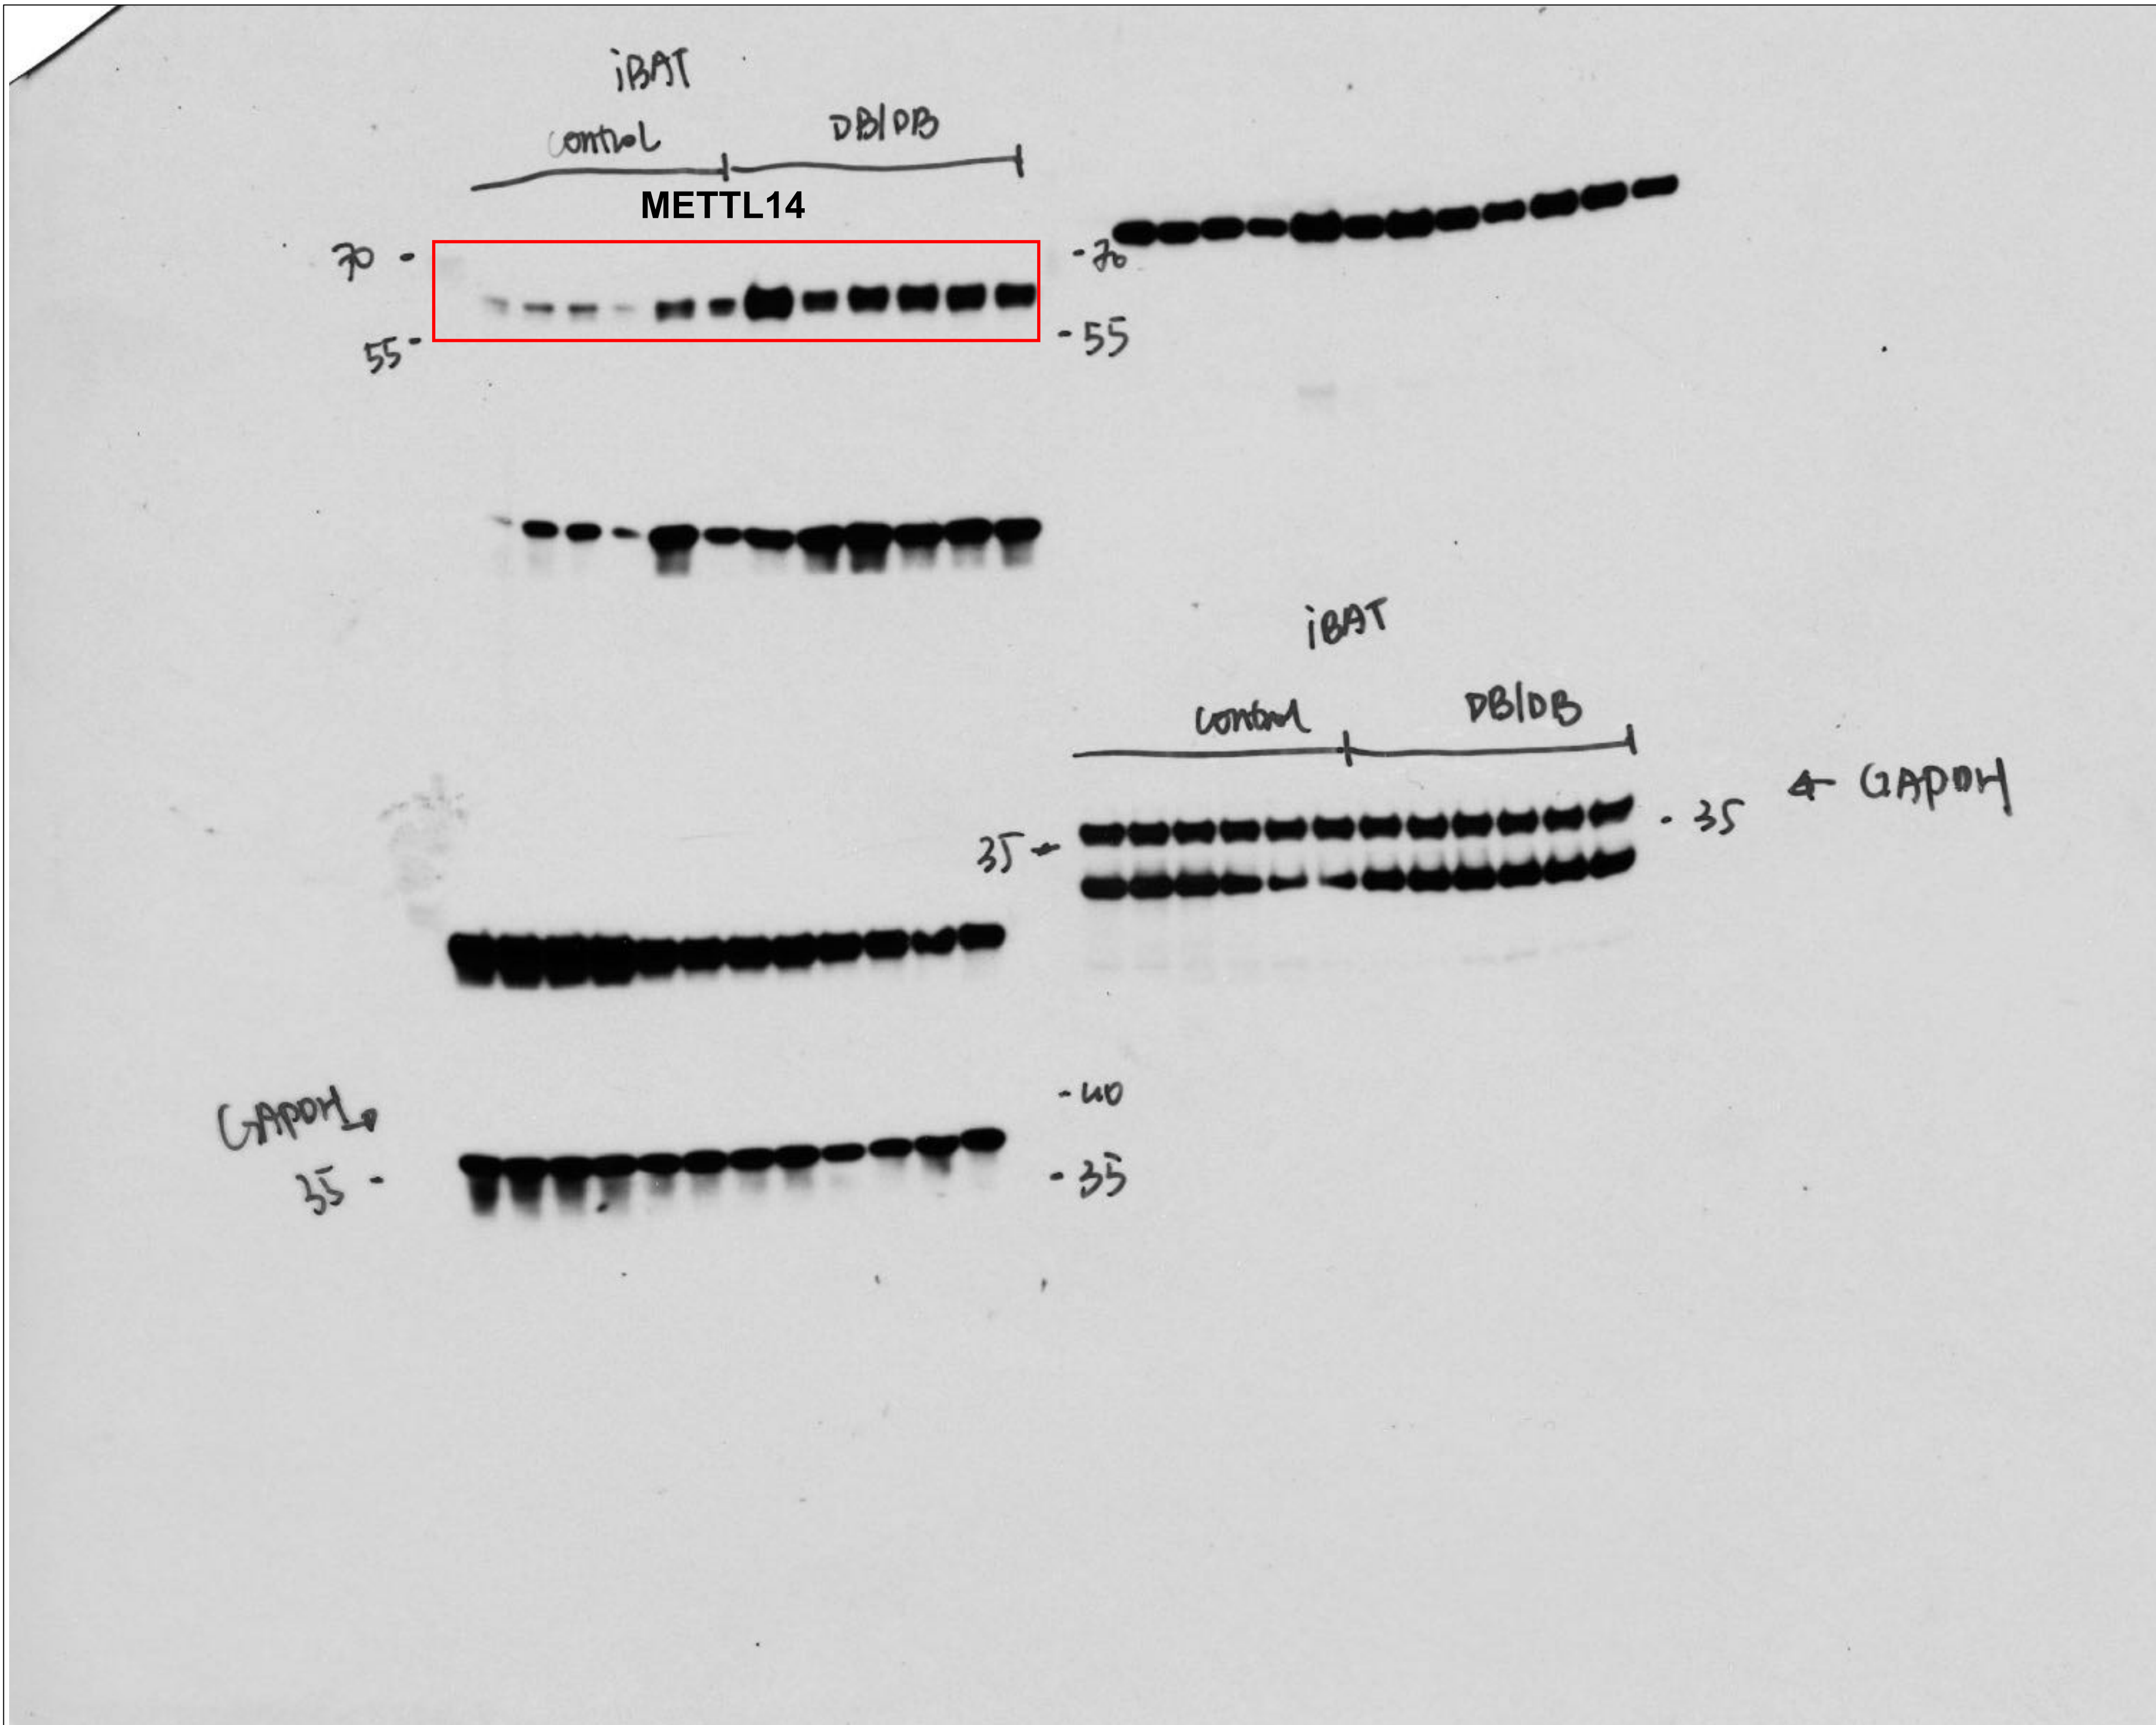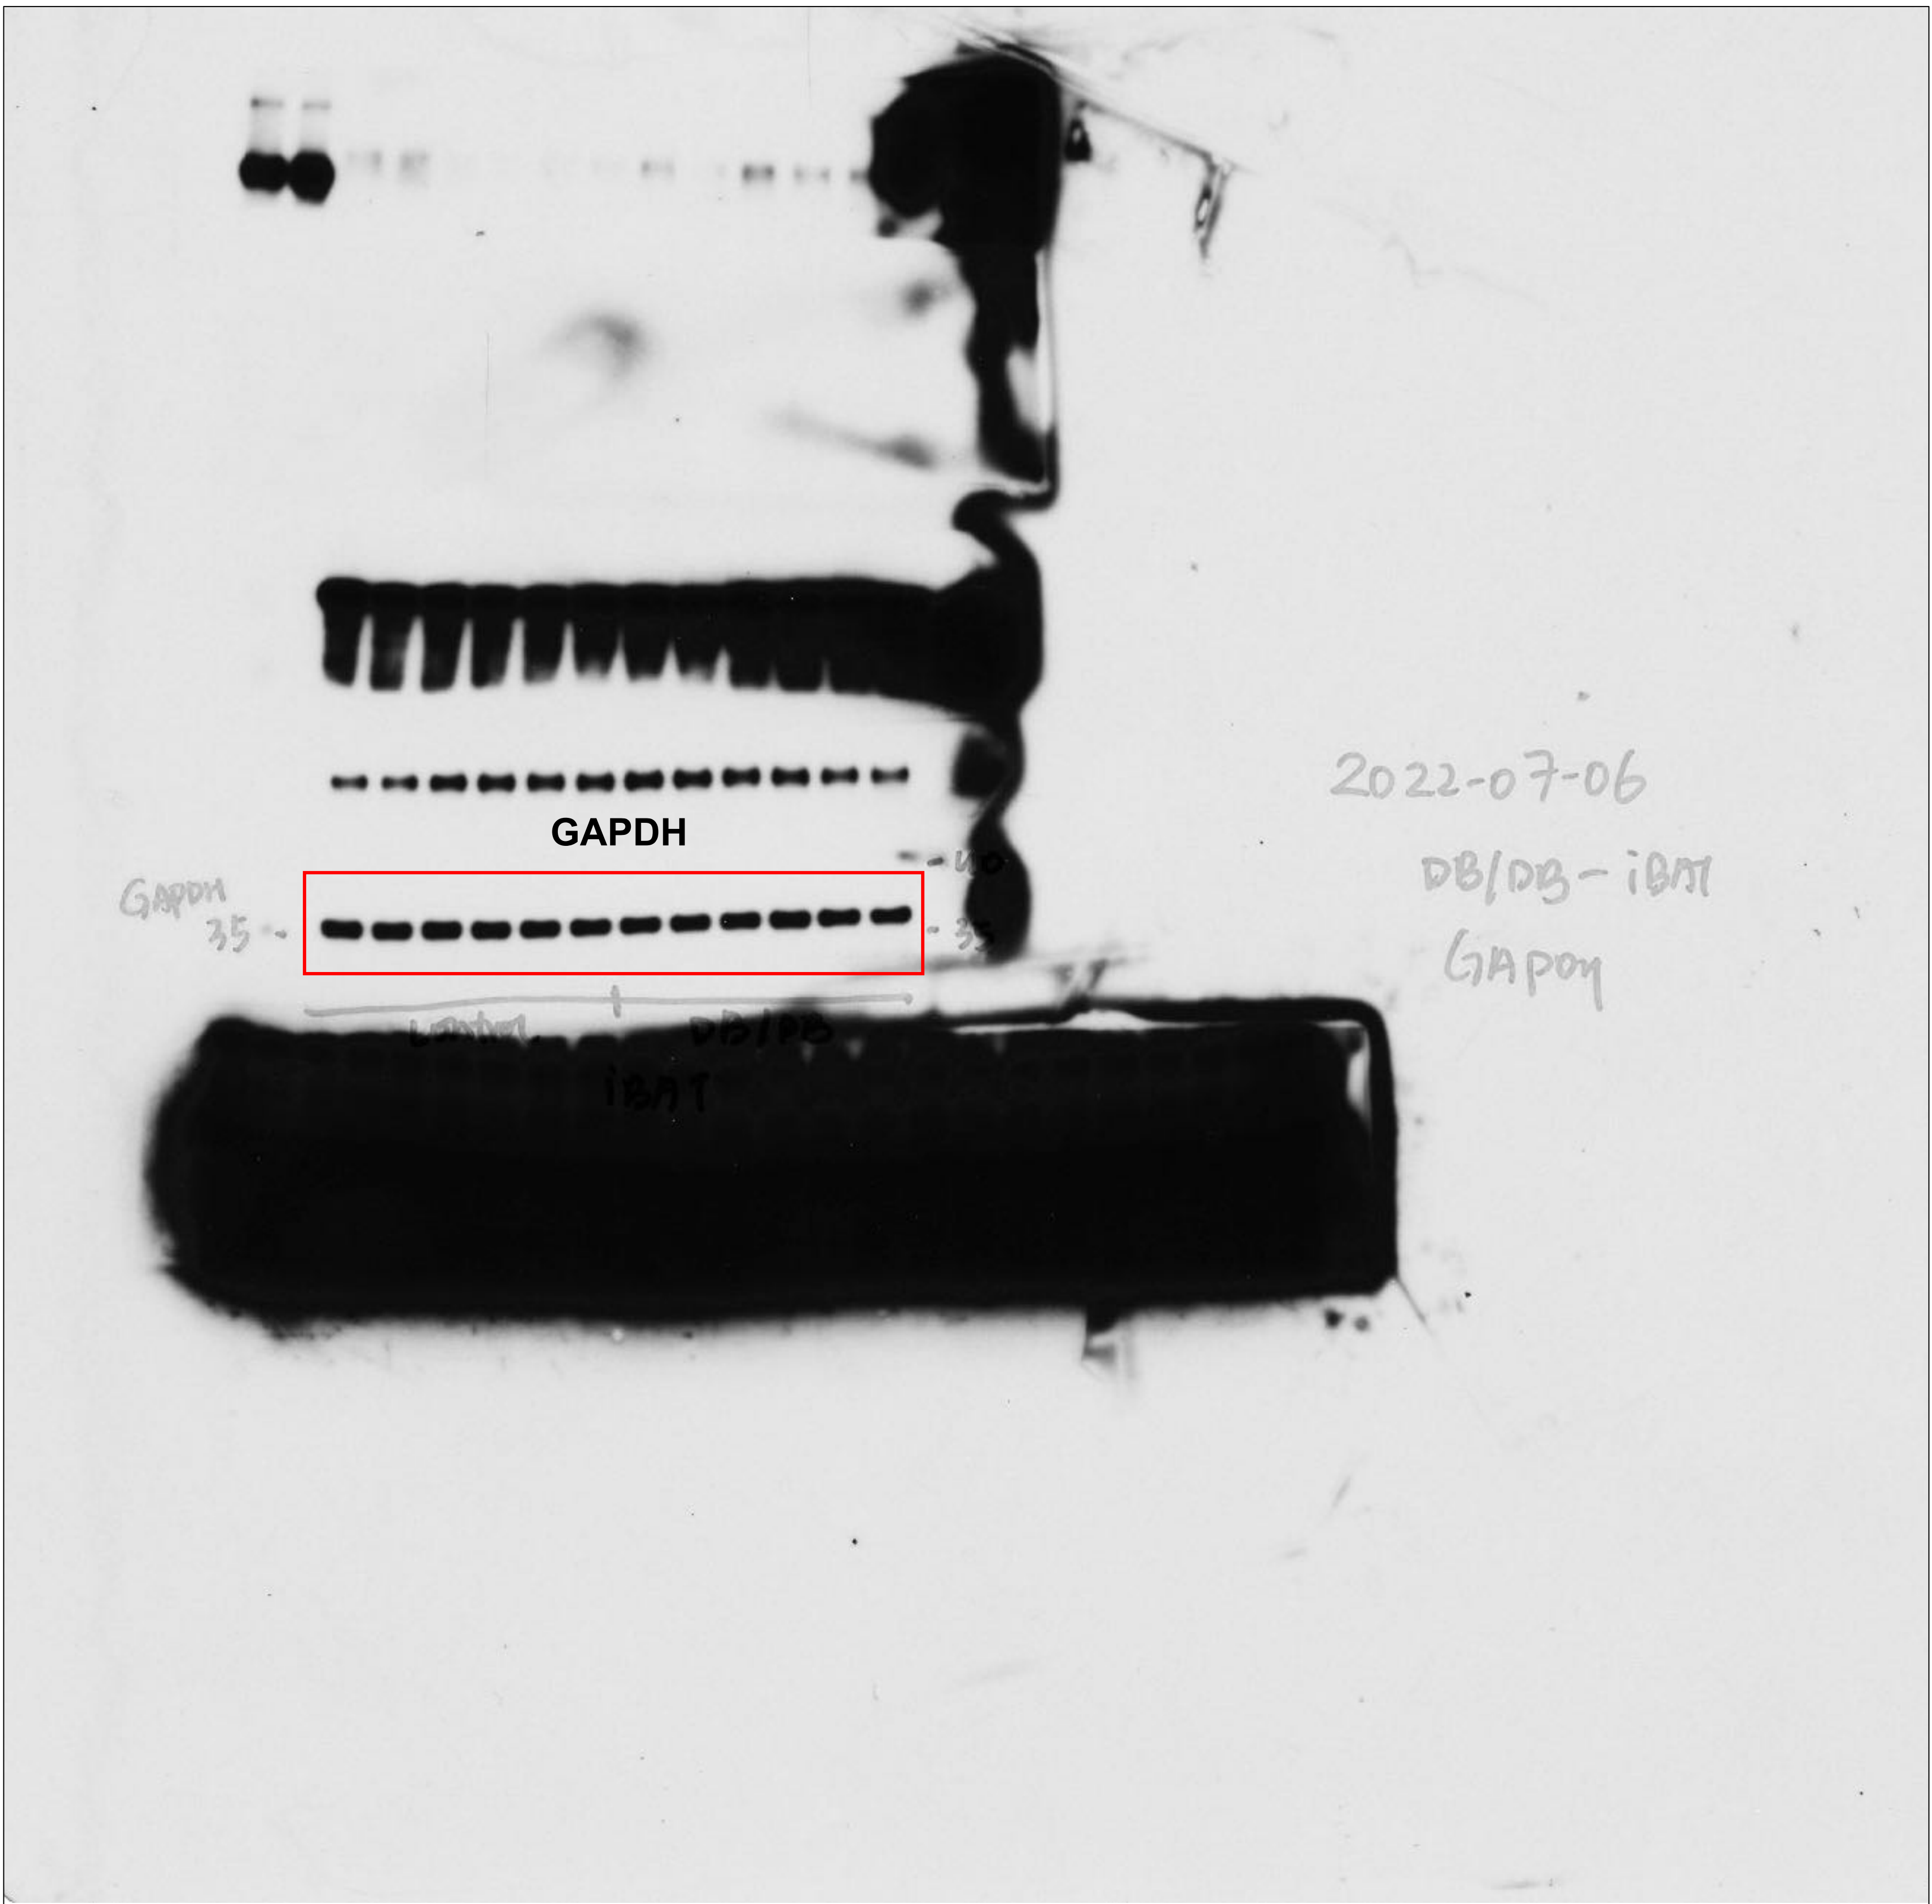



Figure 1o

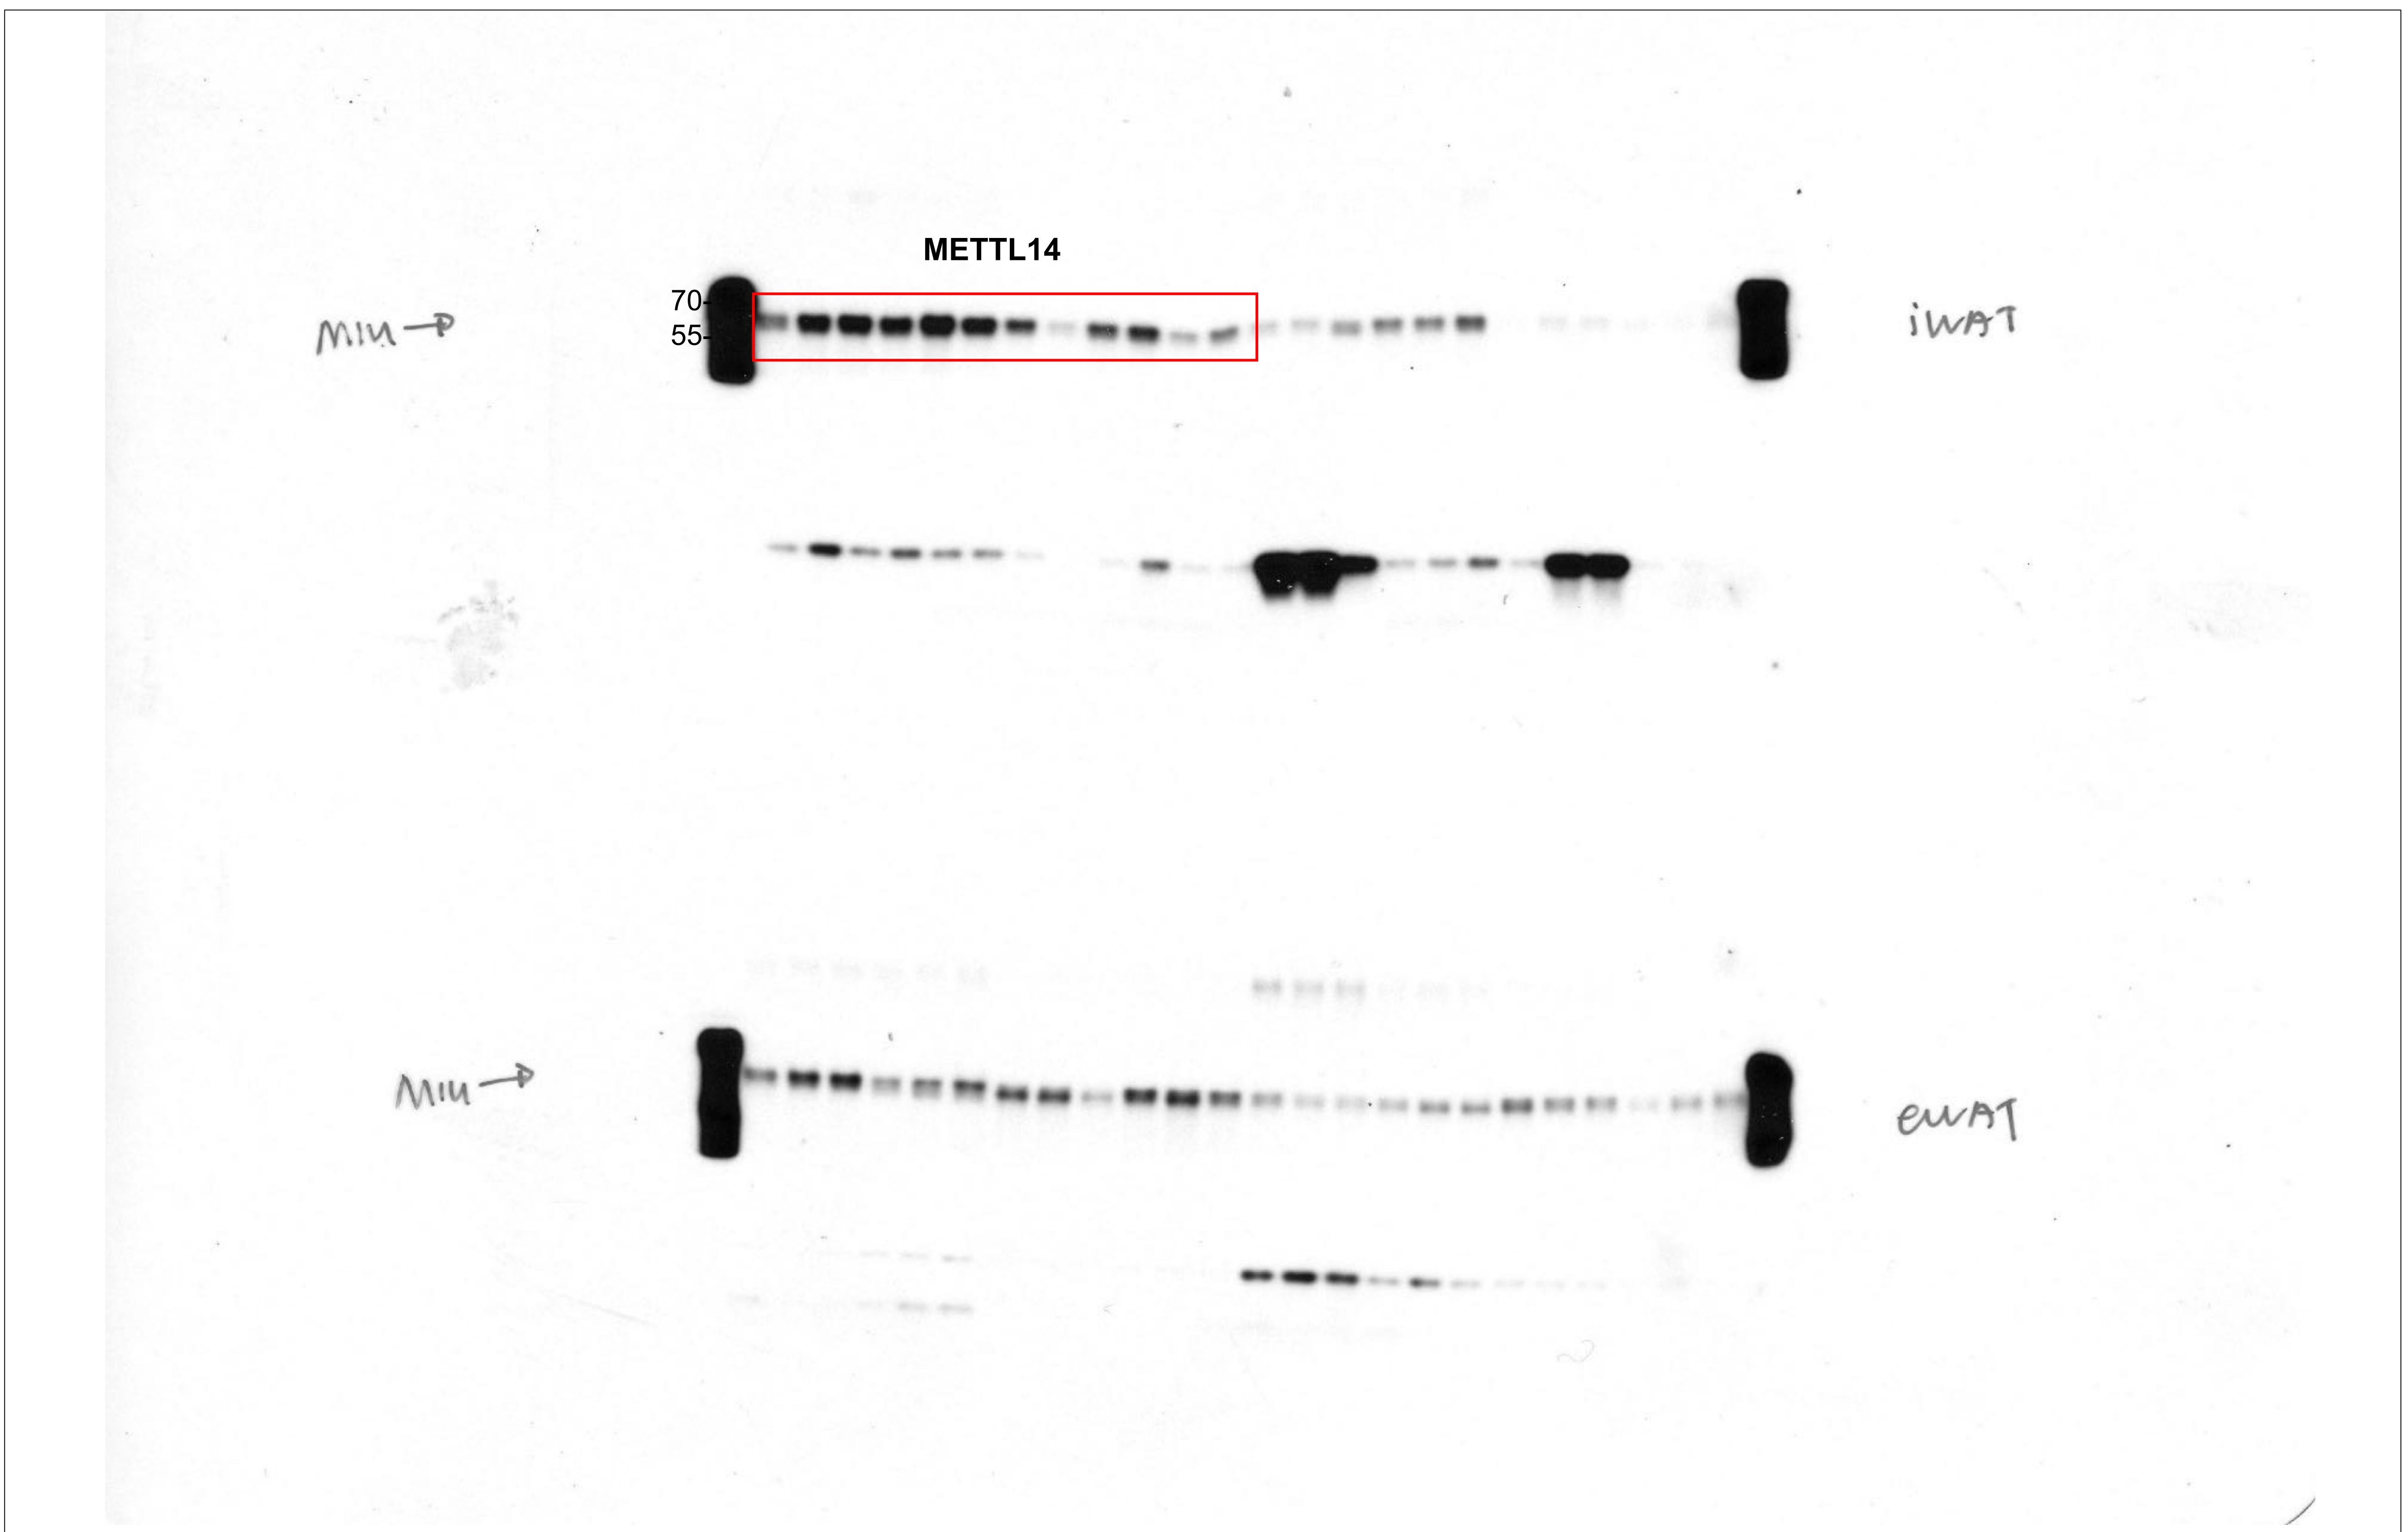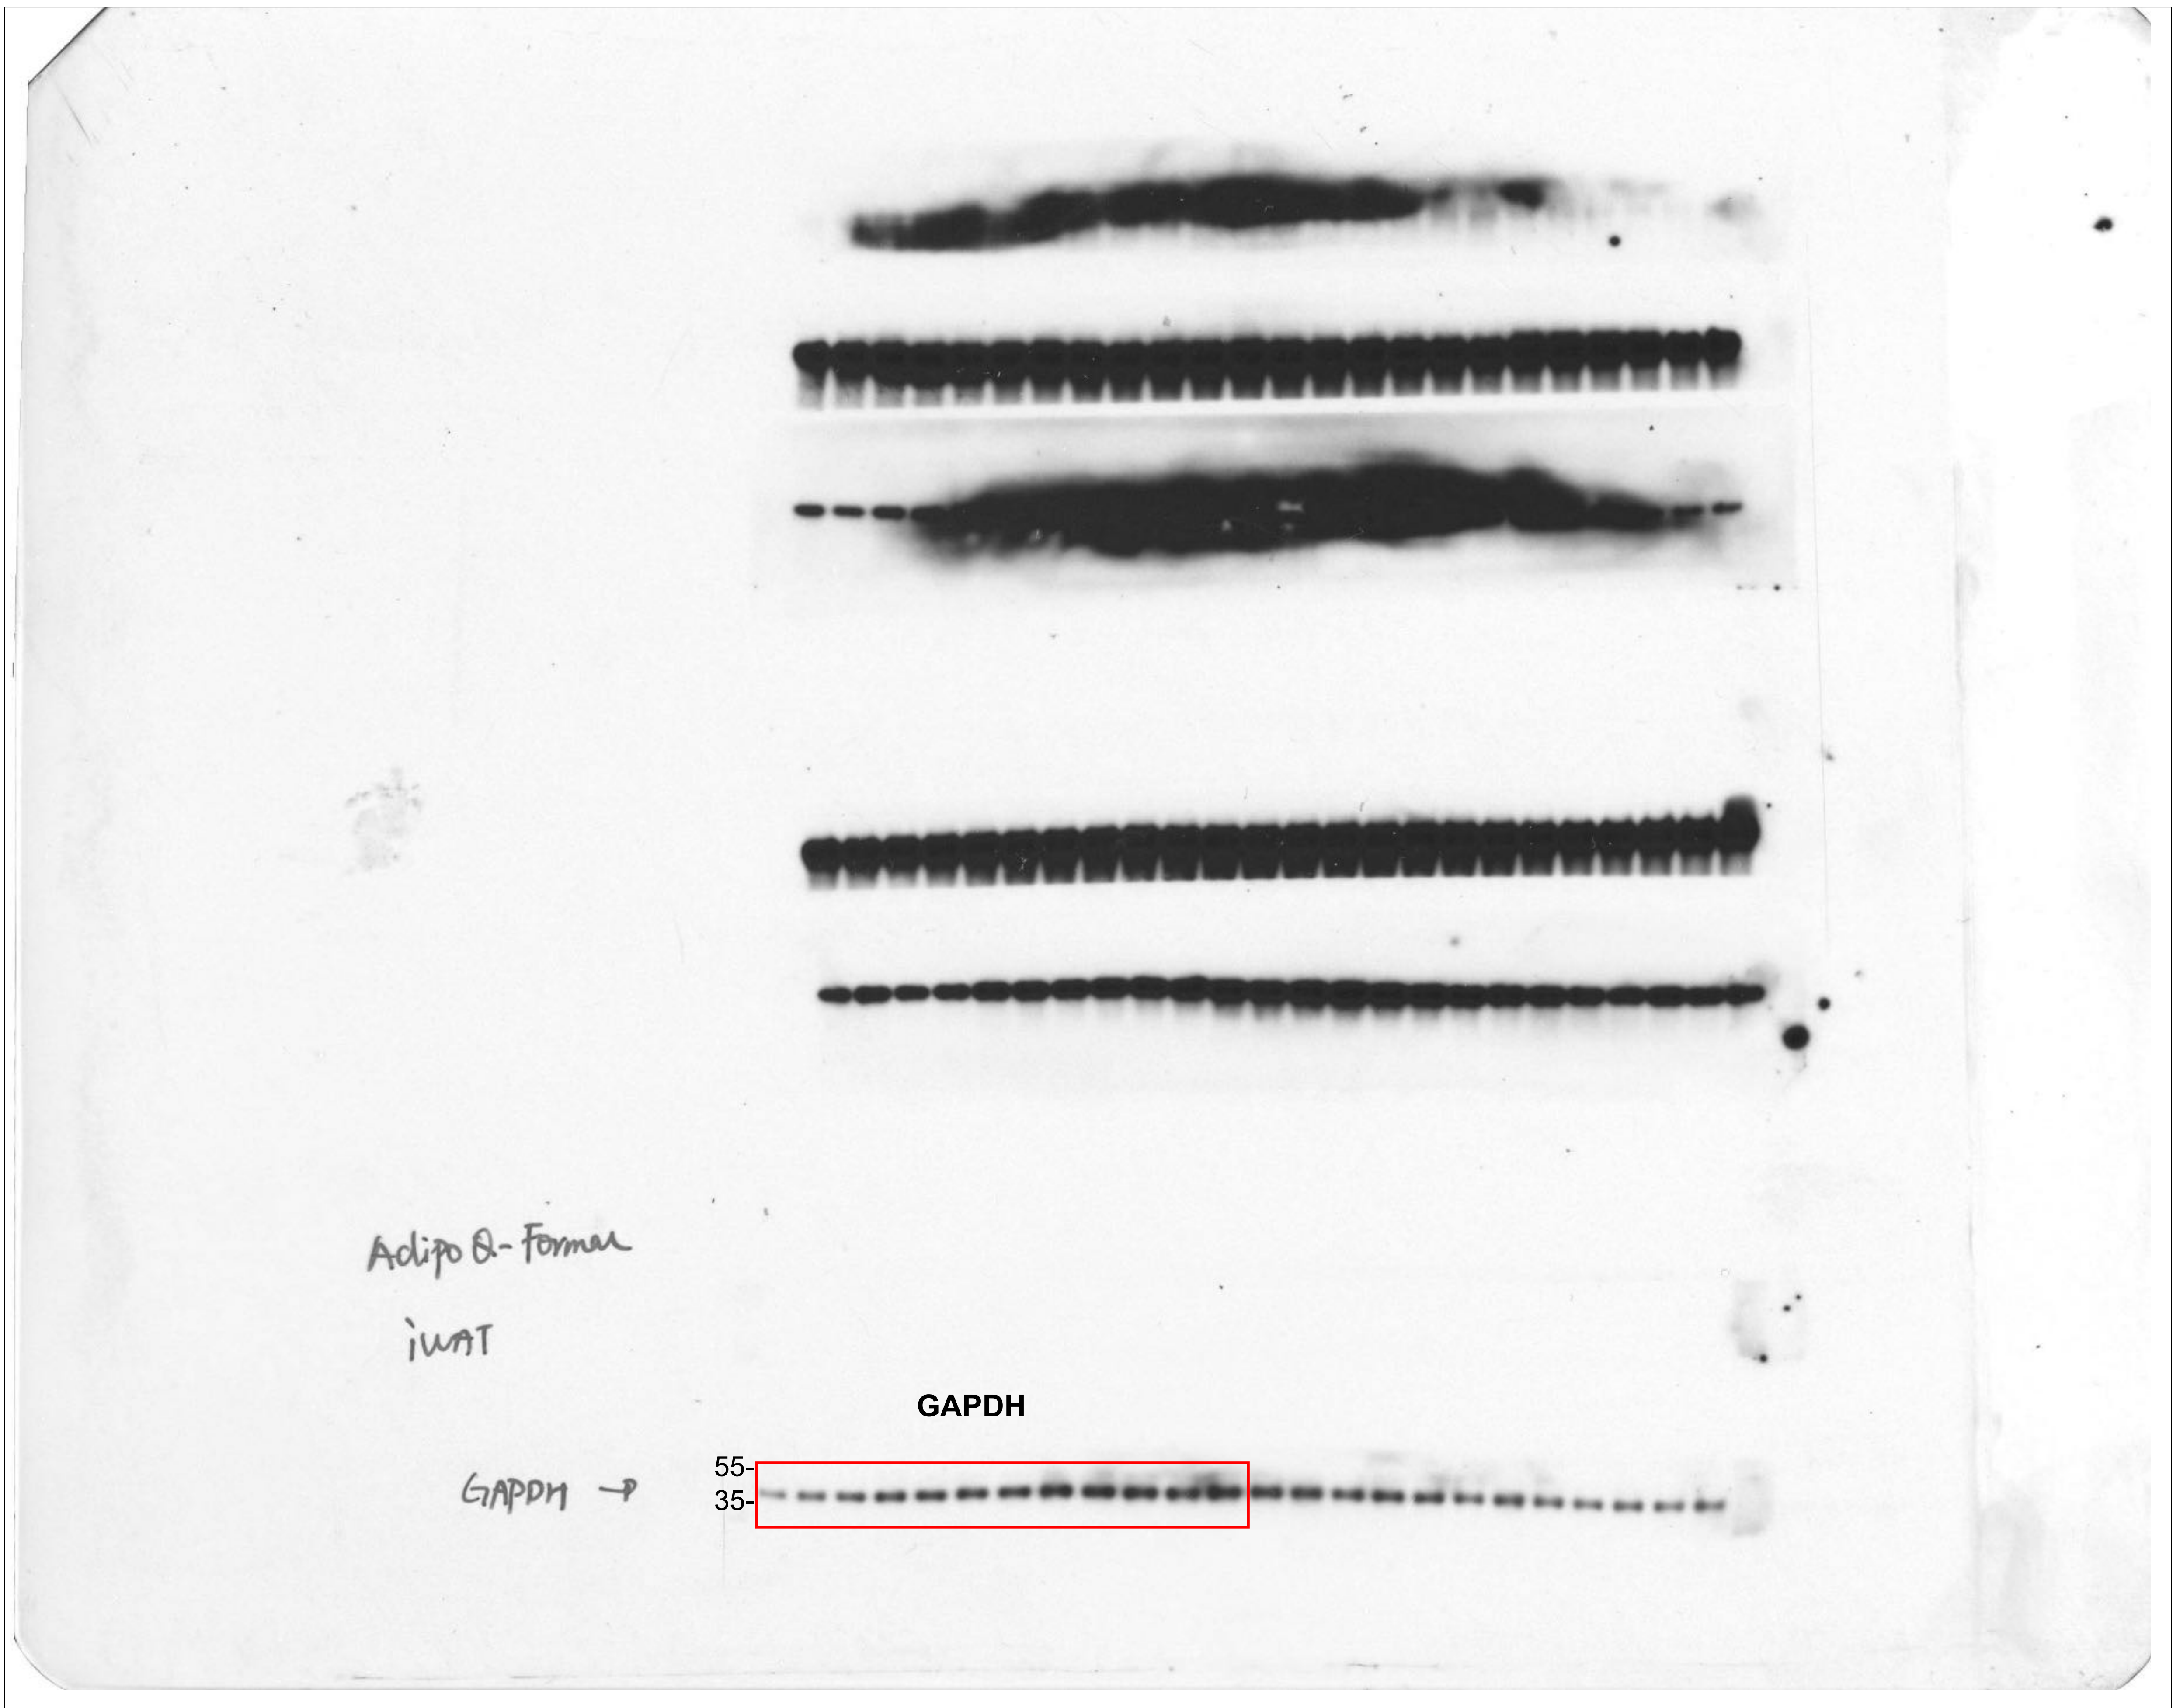



Figure 1o

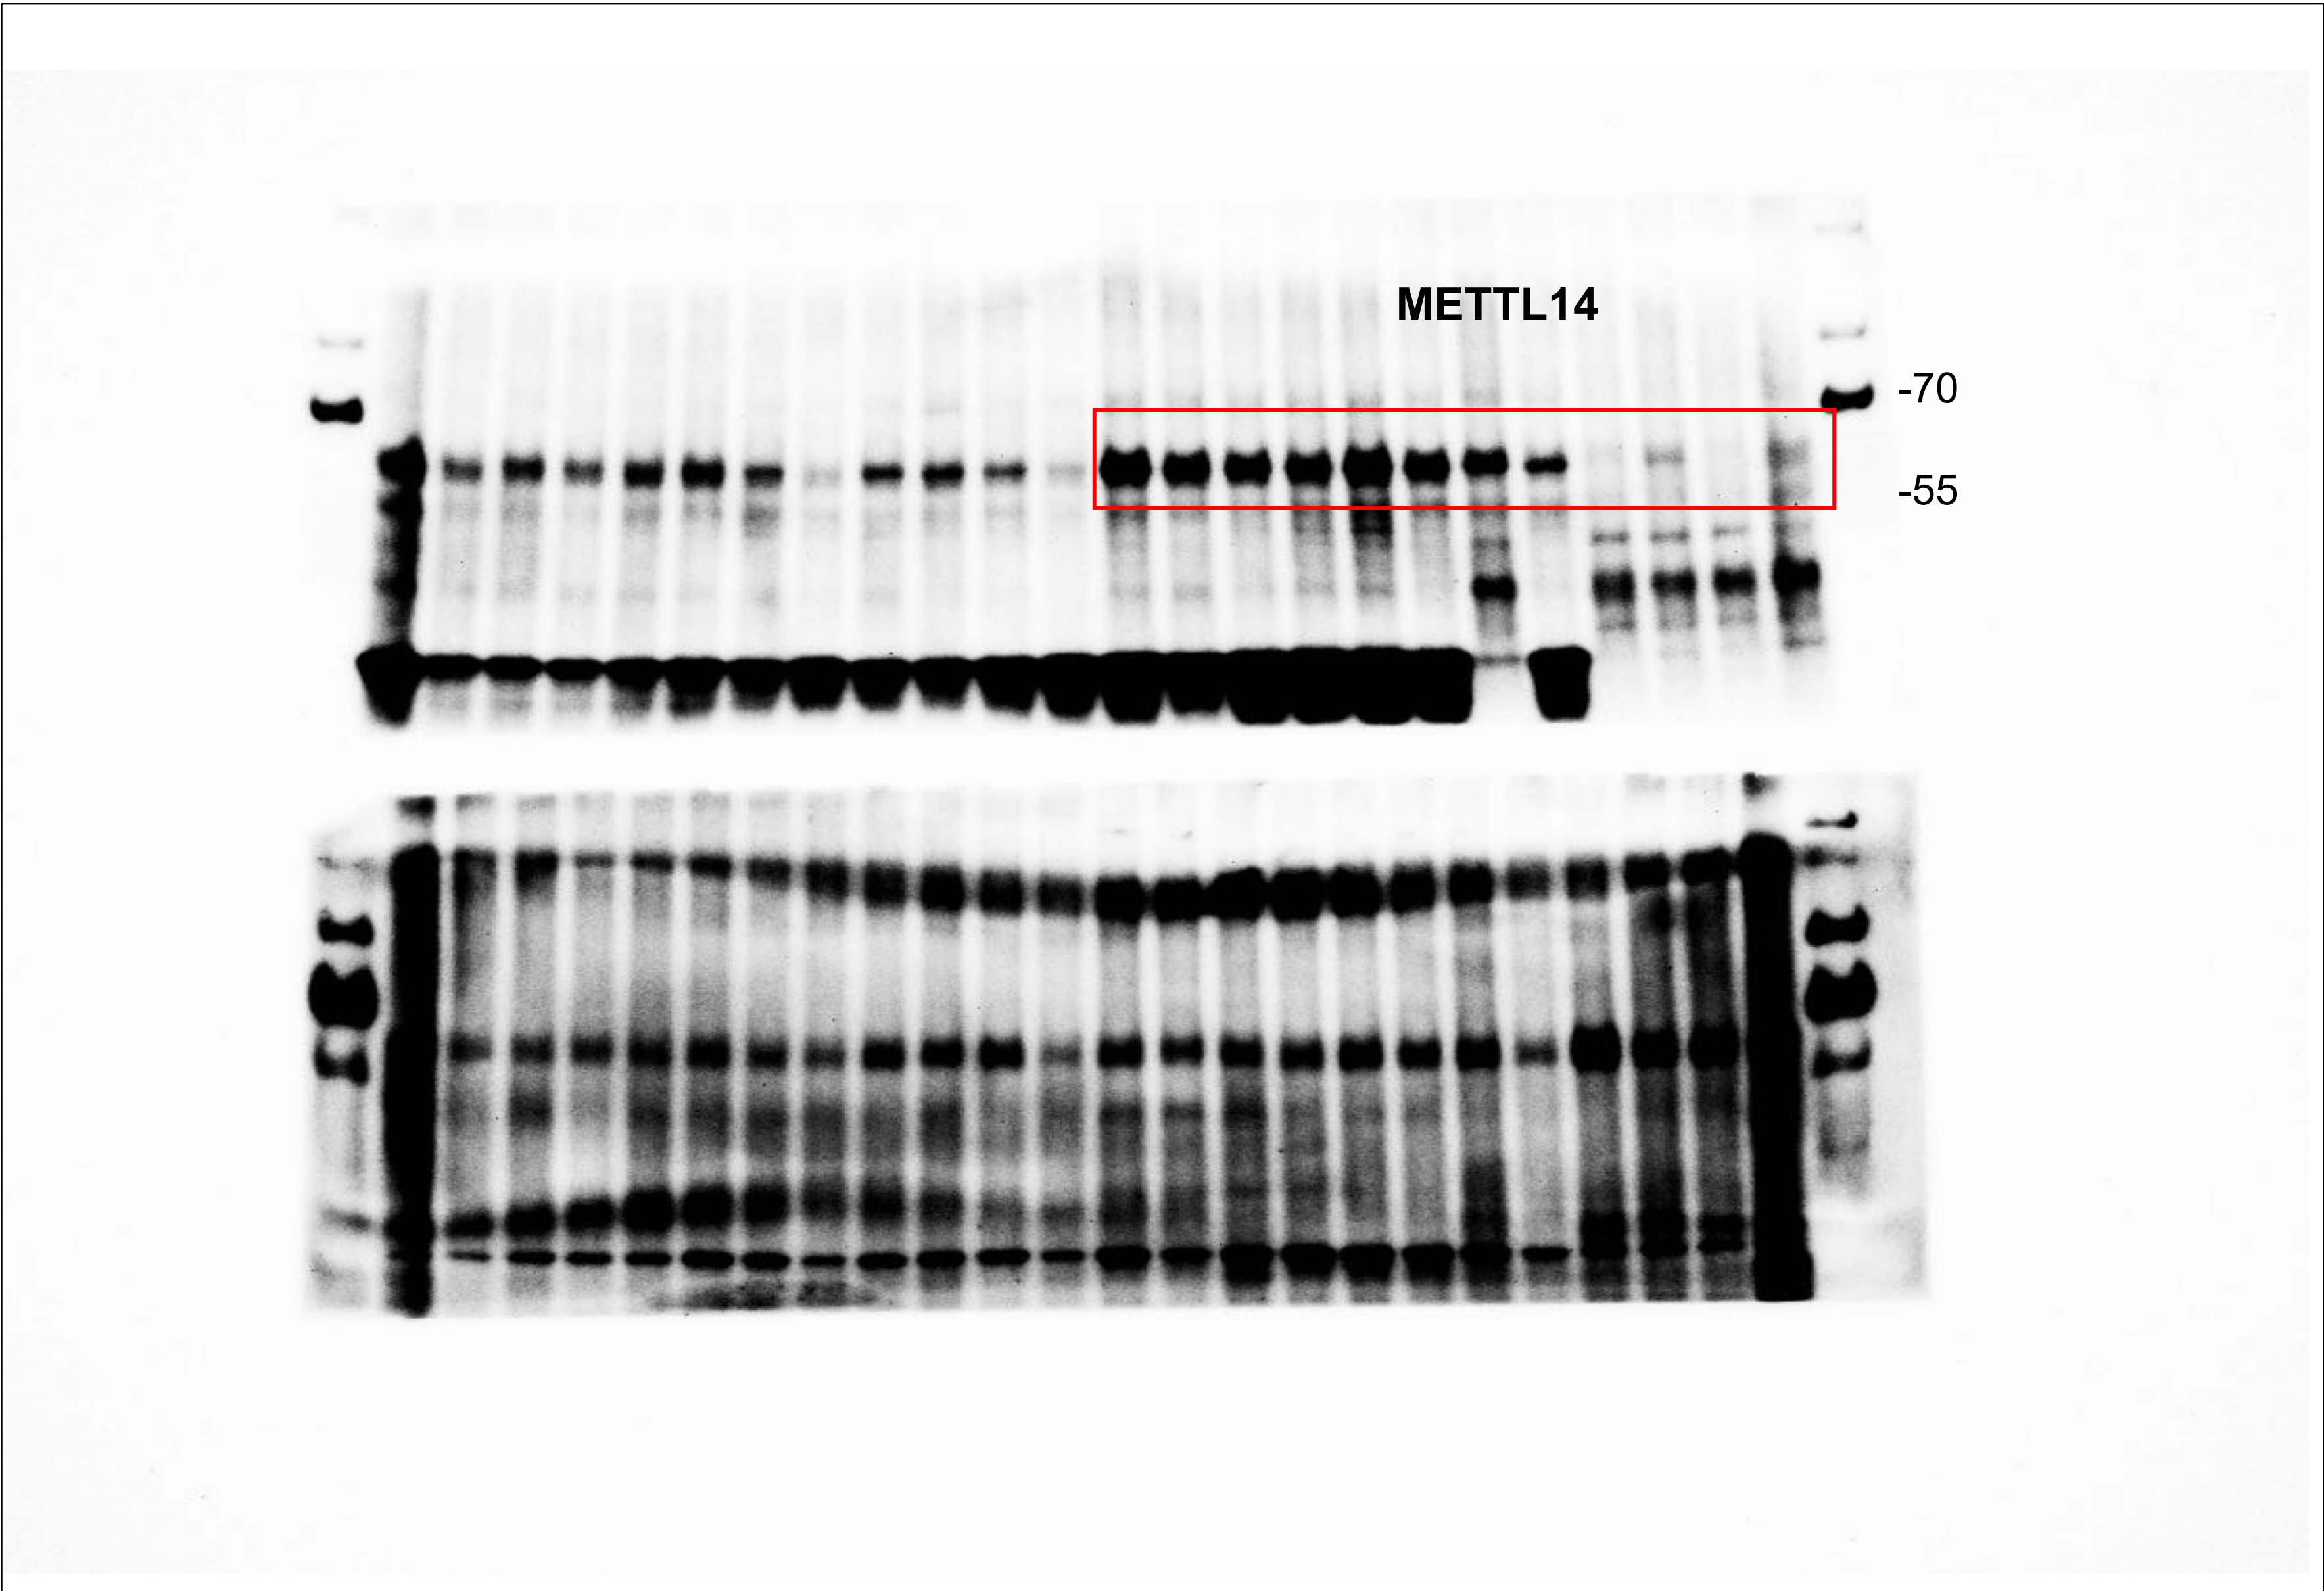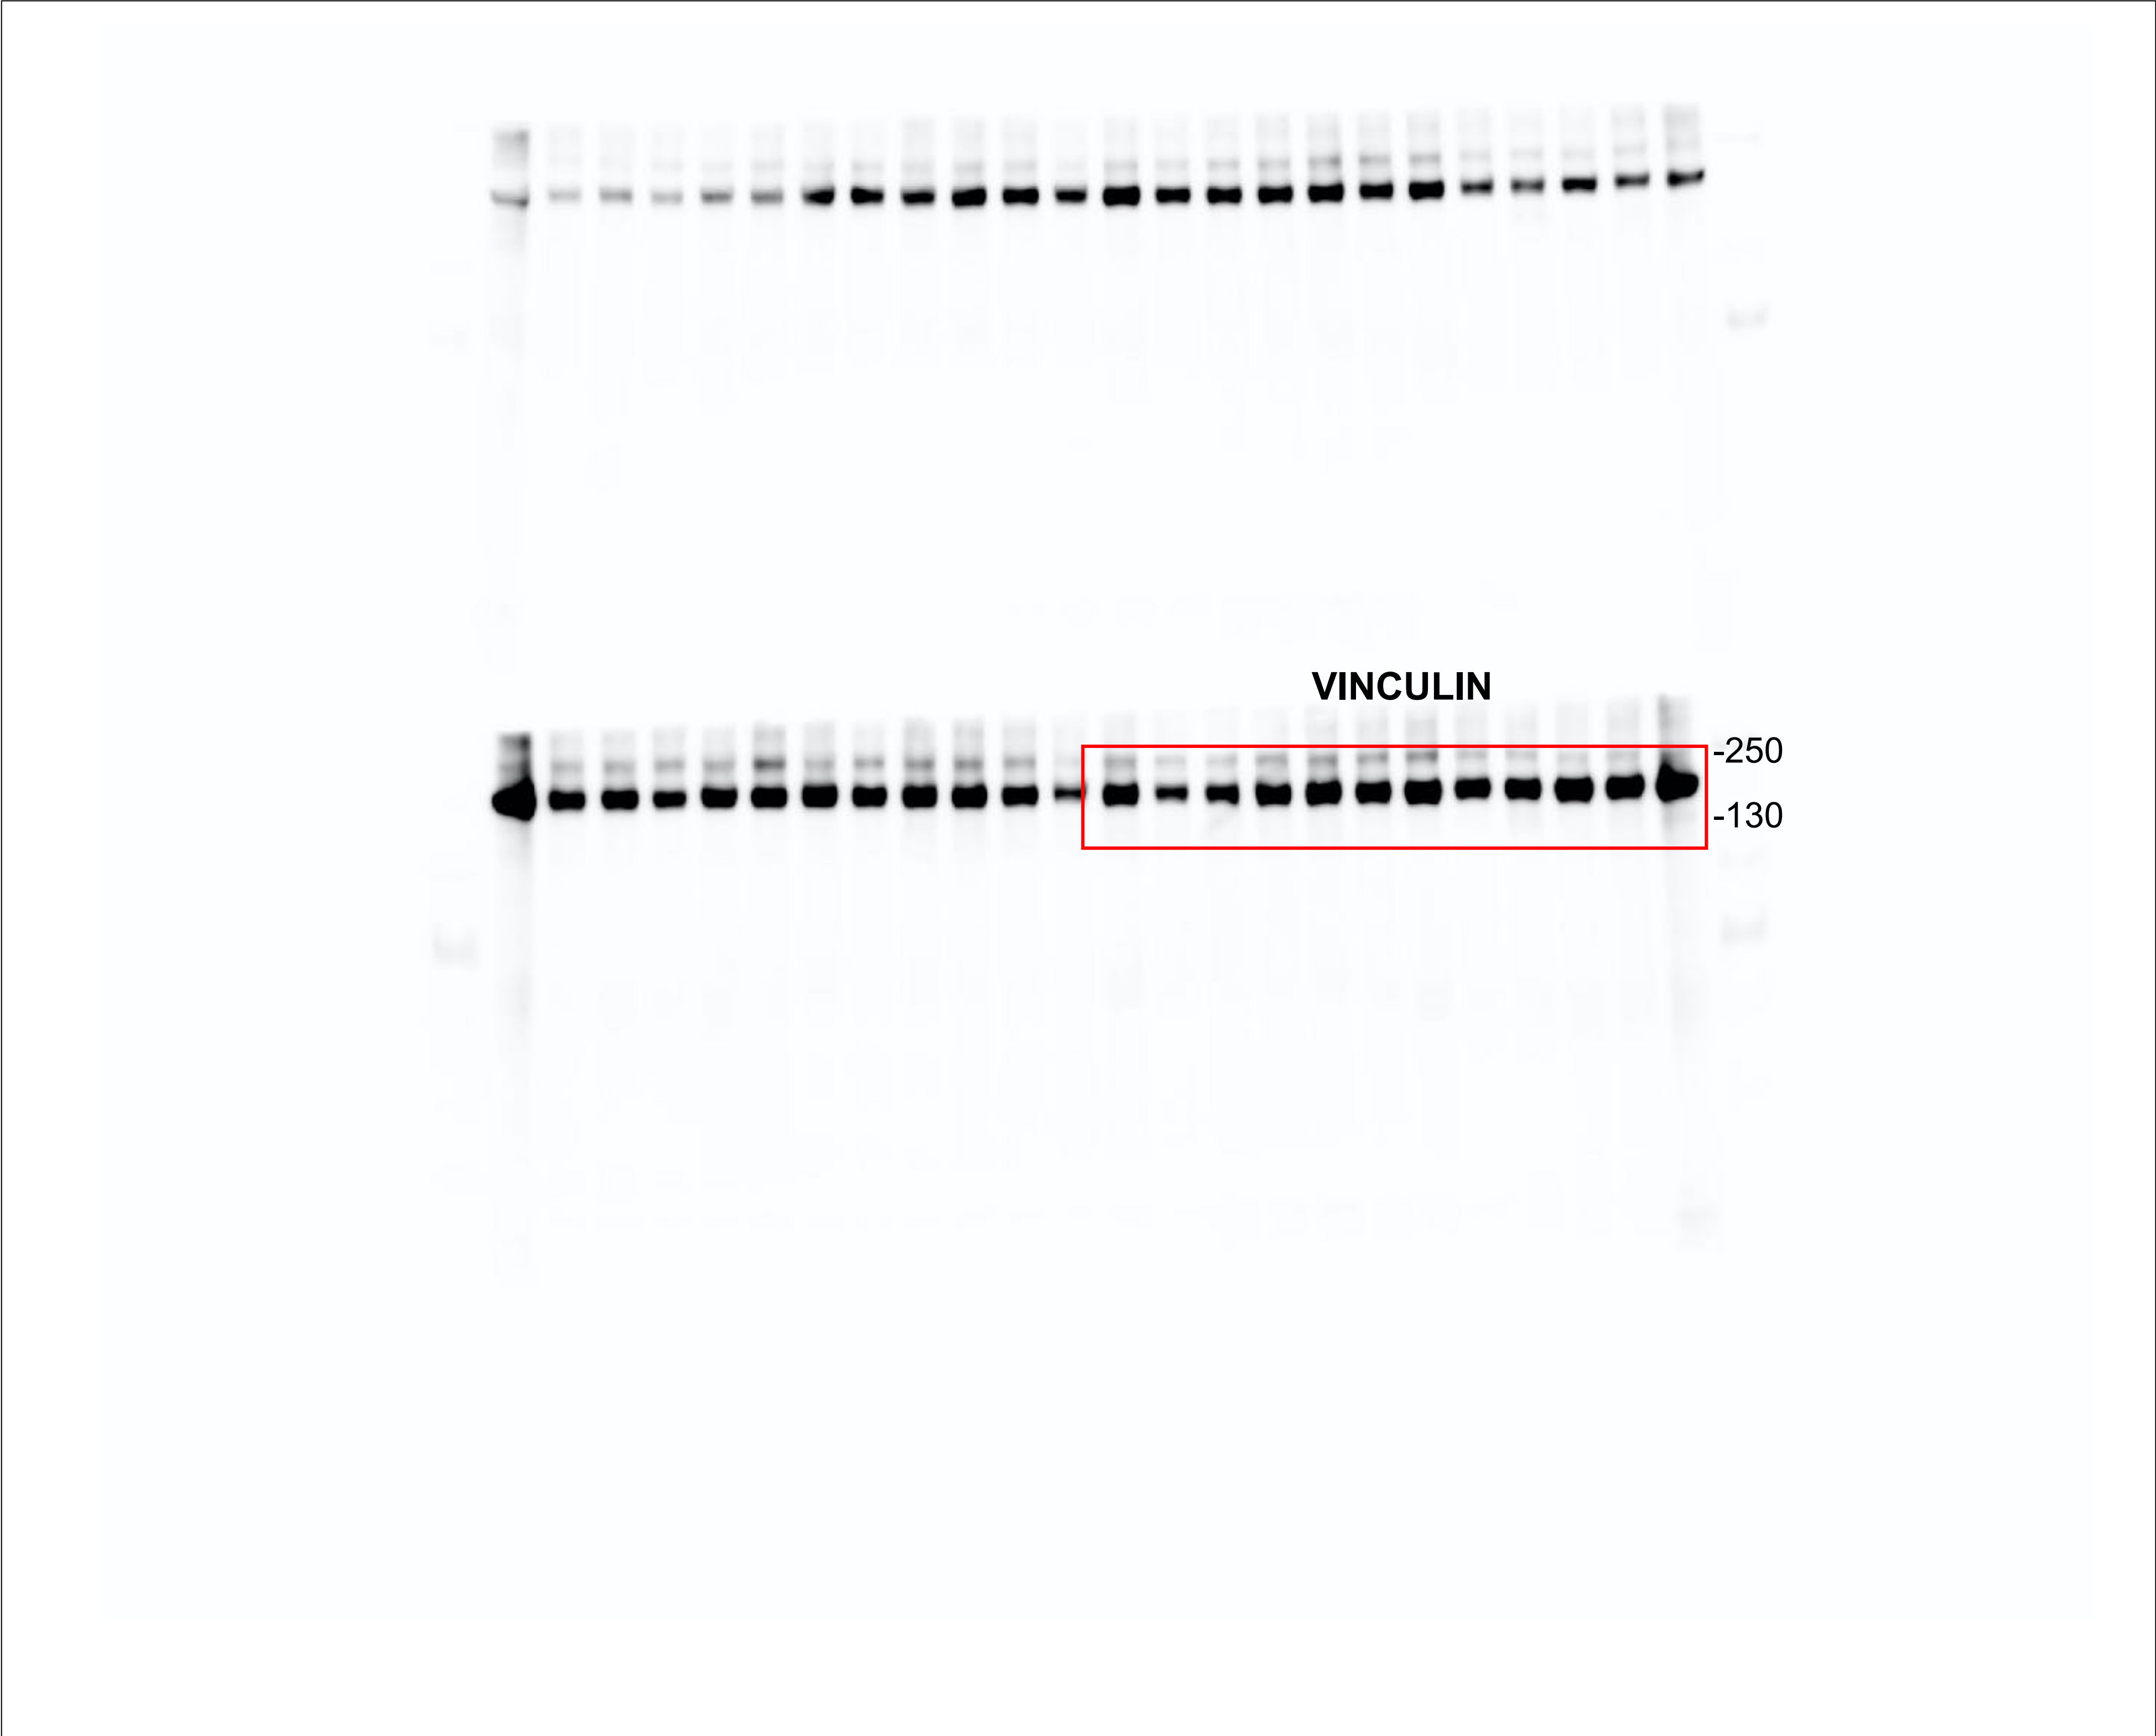

Figure 1o

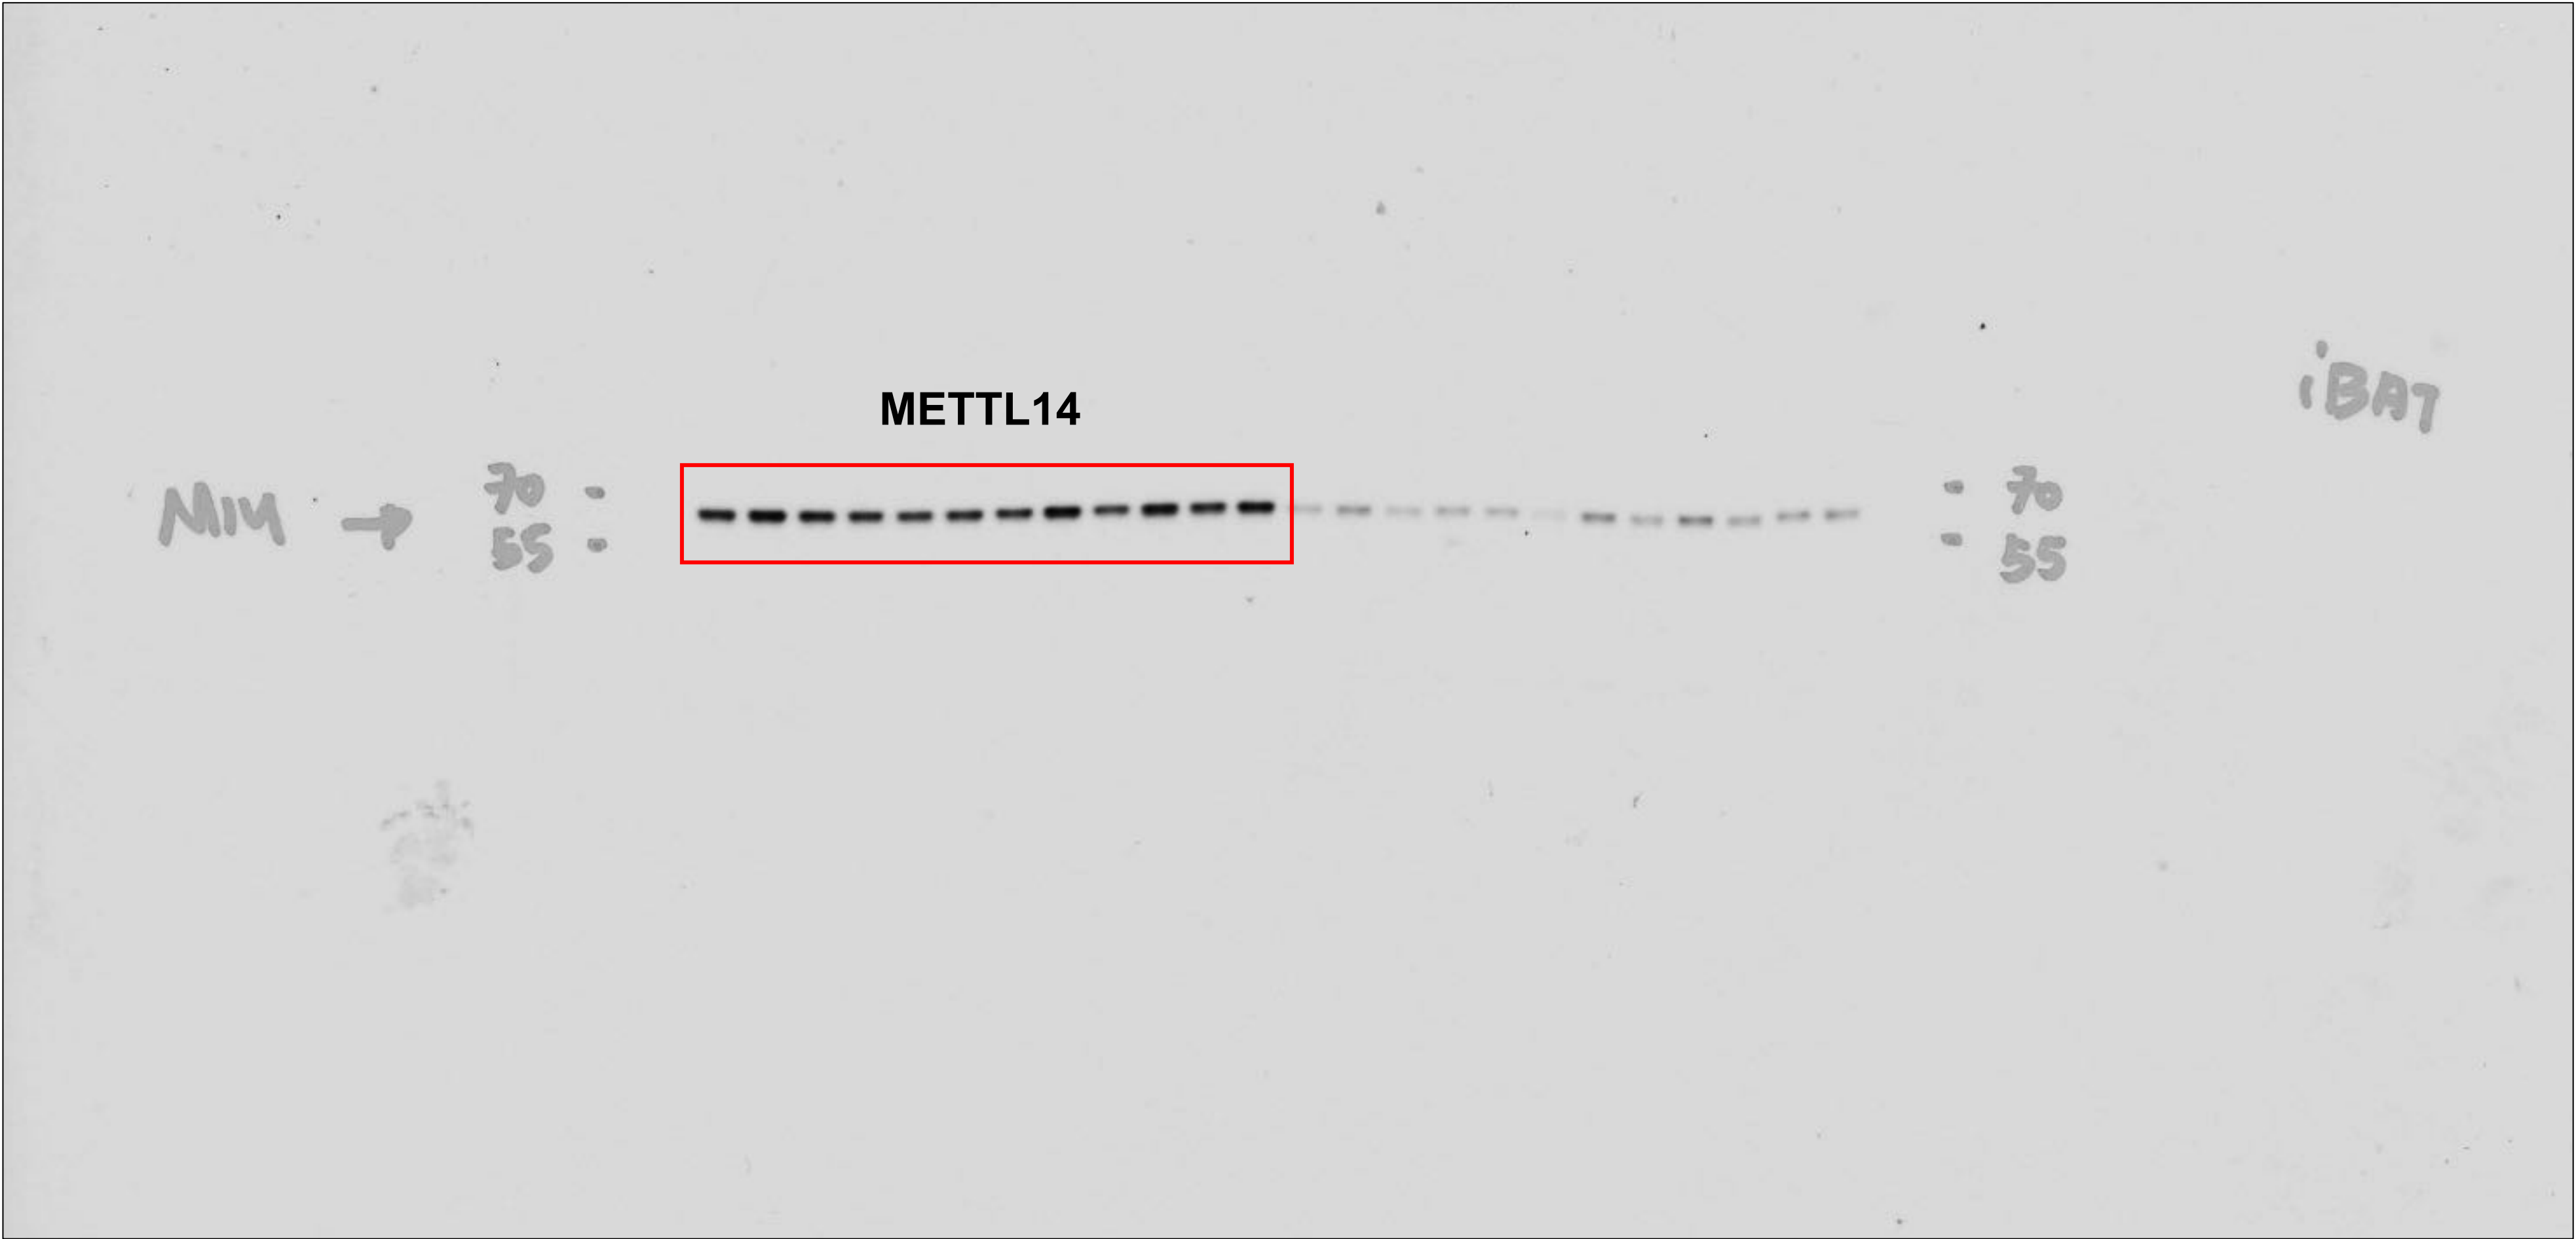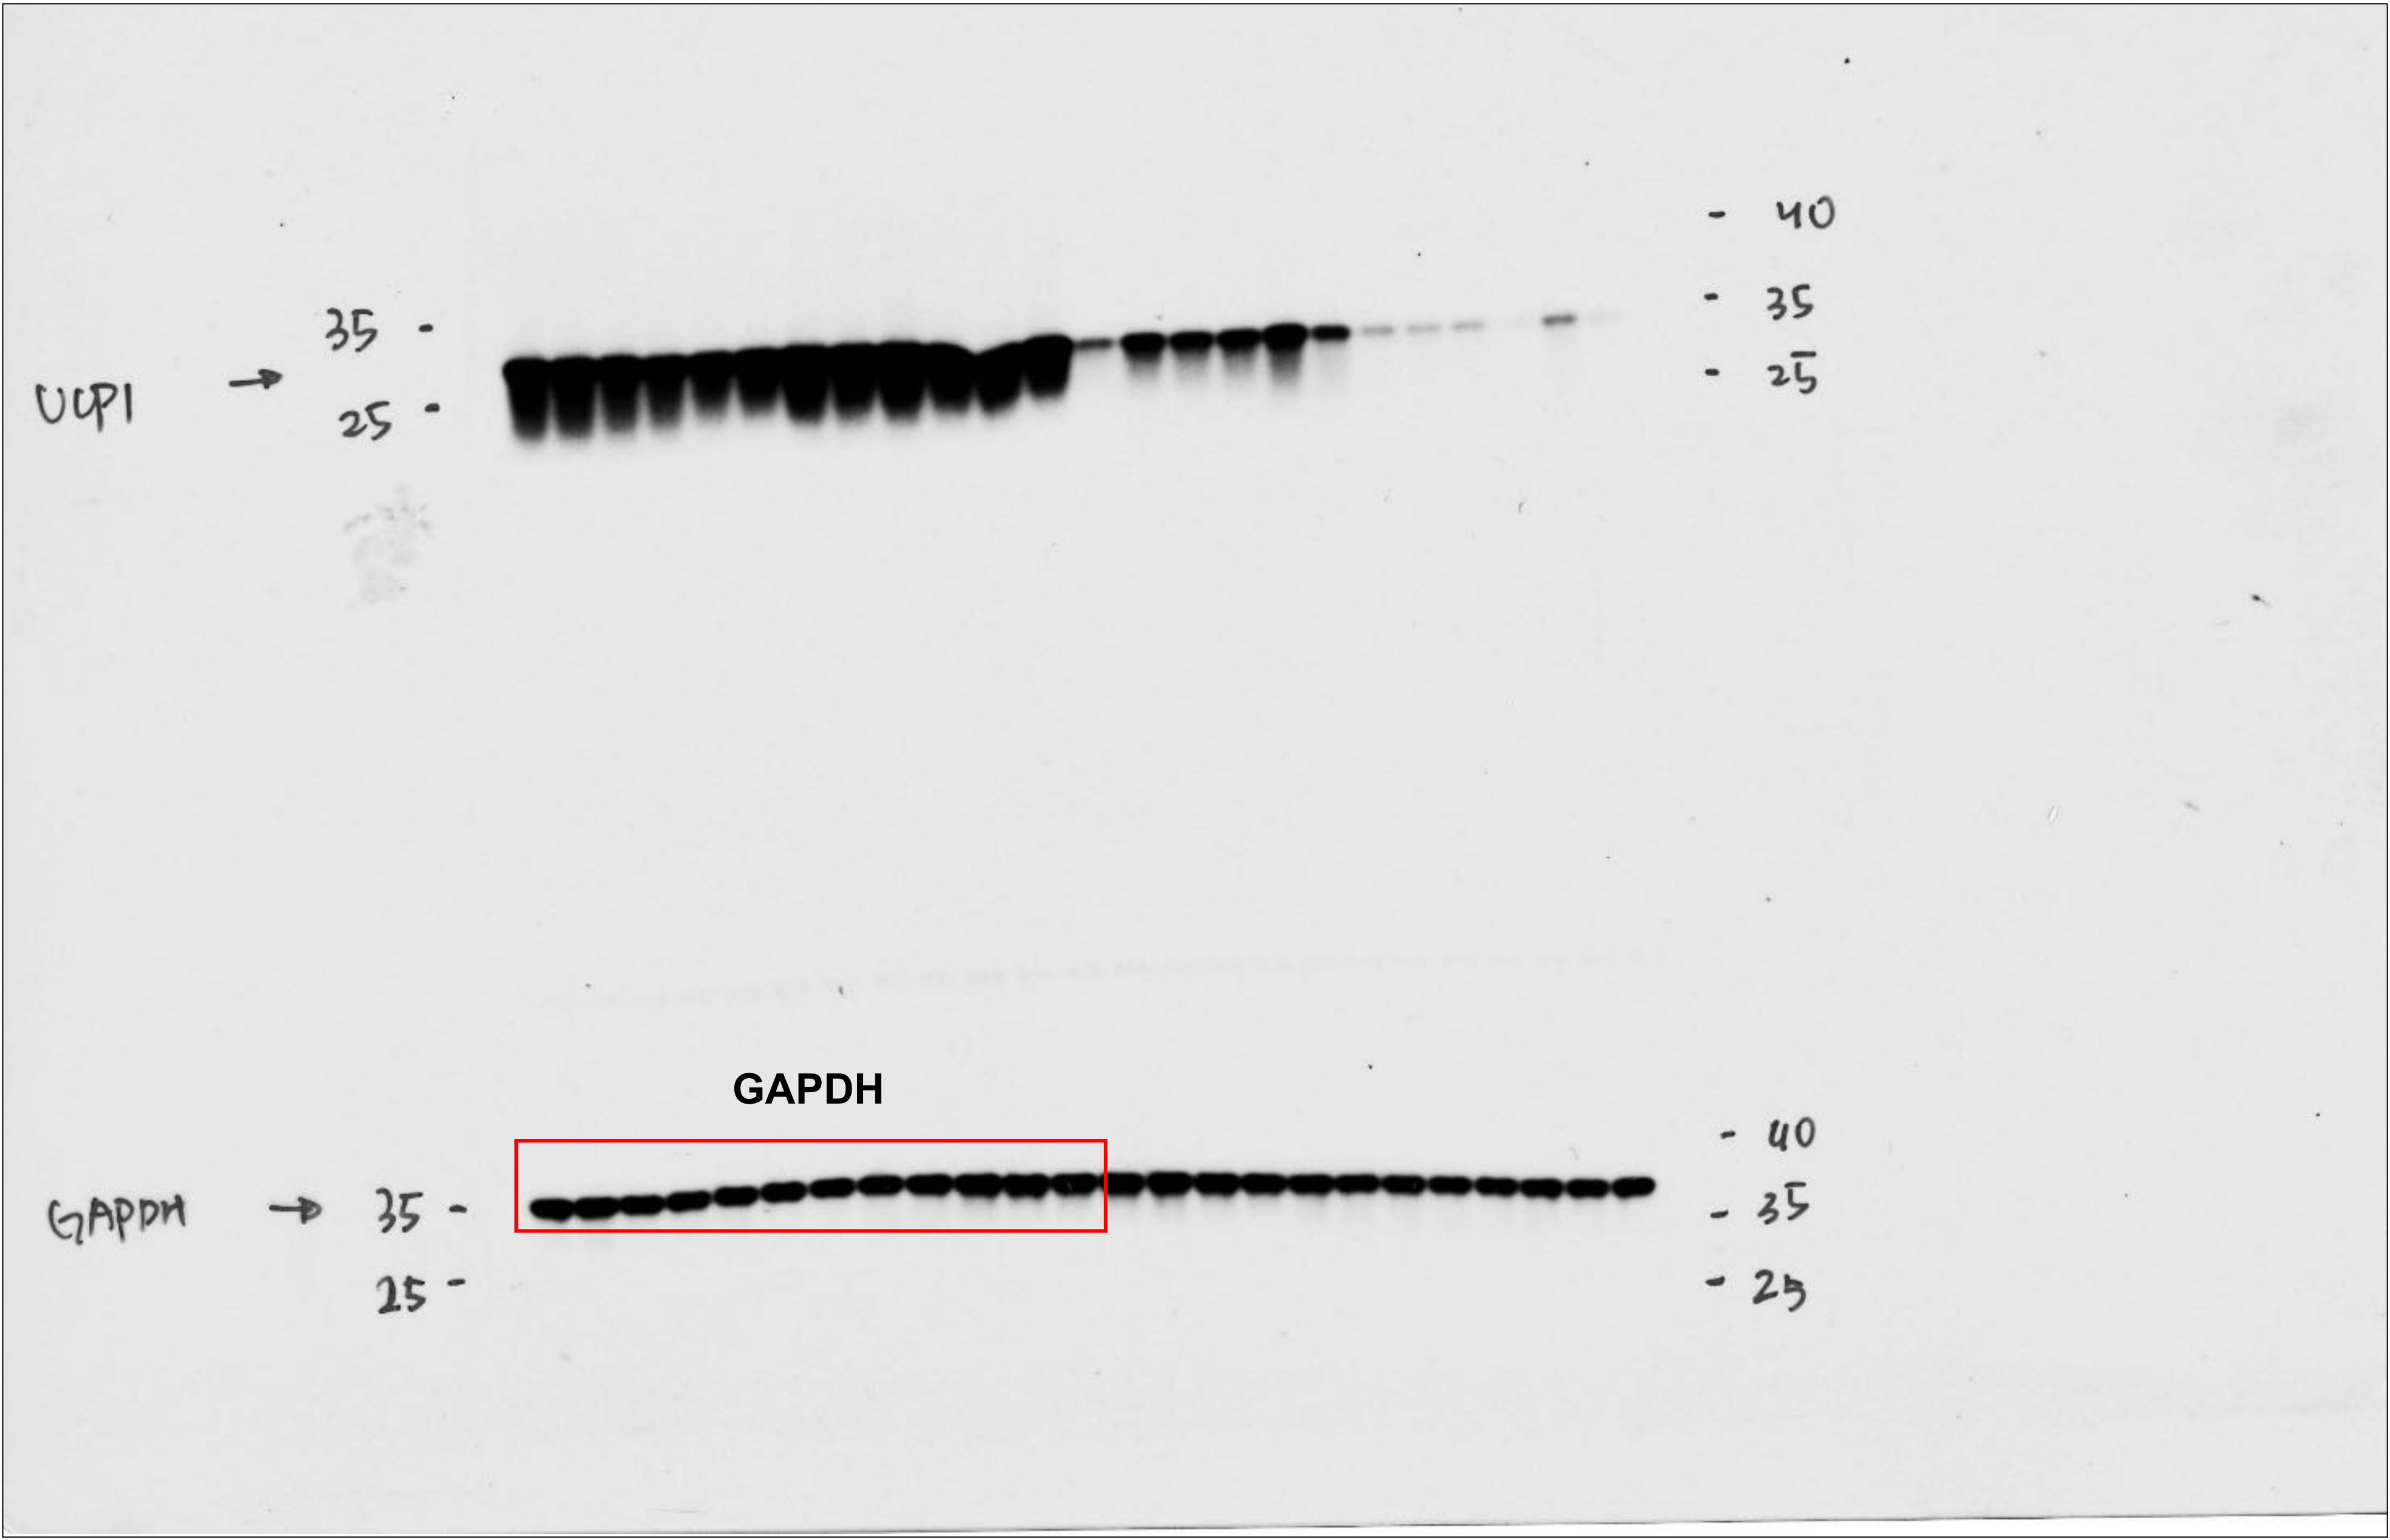

Please note this blot (GAPDH) is identical to blot (GAPDH) presented in Figure 3d as the same membrane was used for probing with a different antibody.



Figure 3b

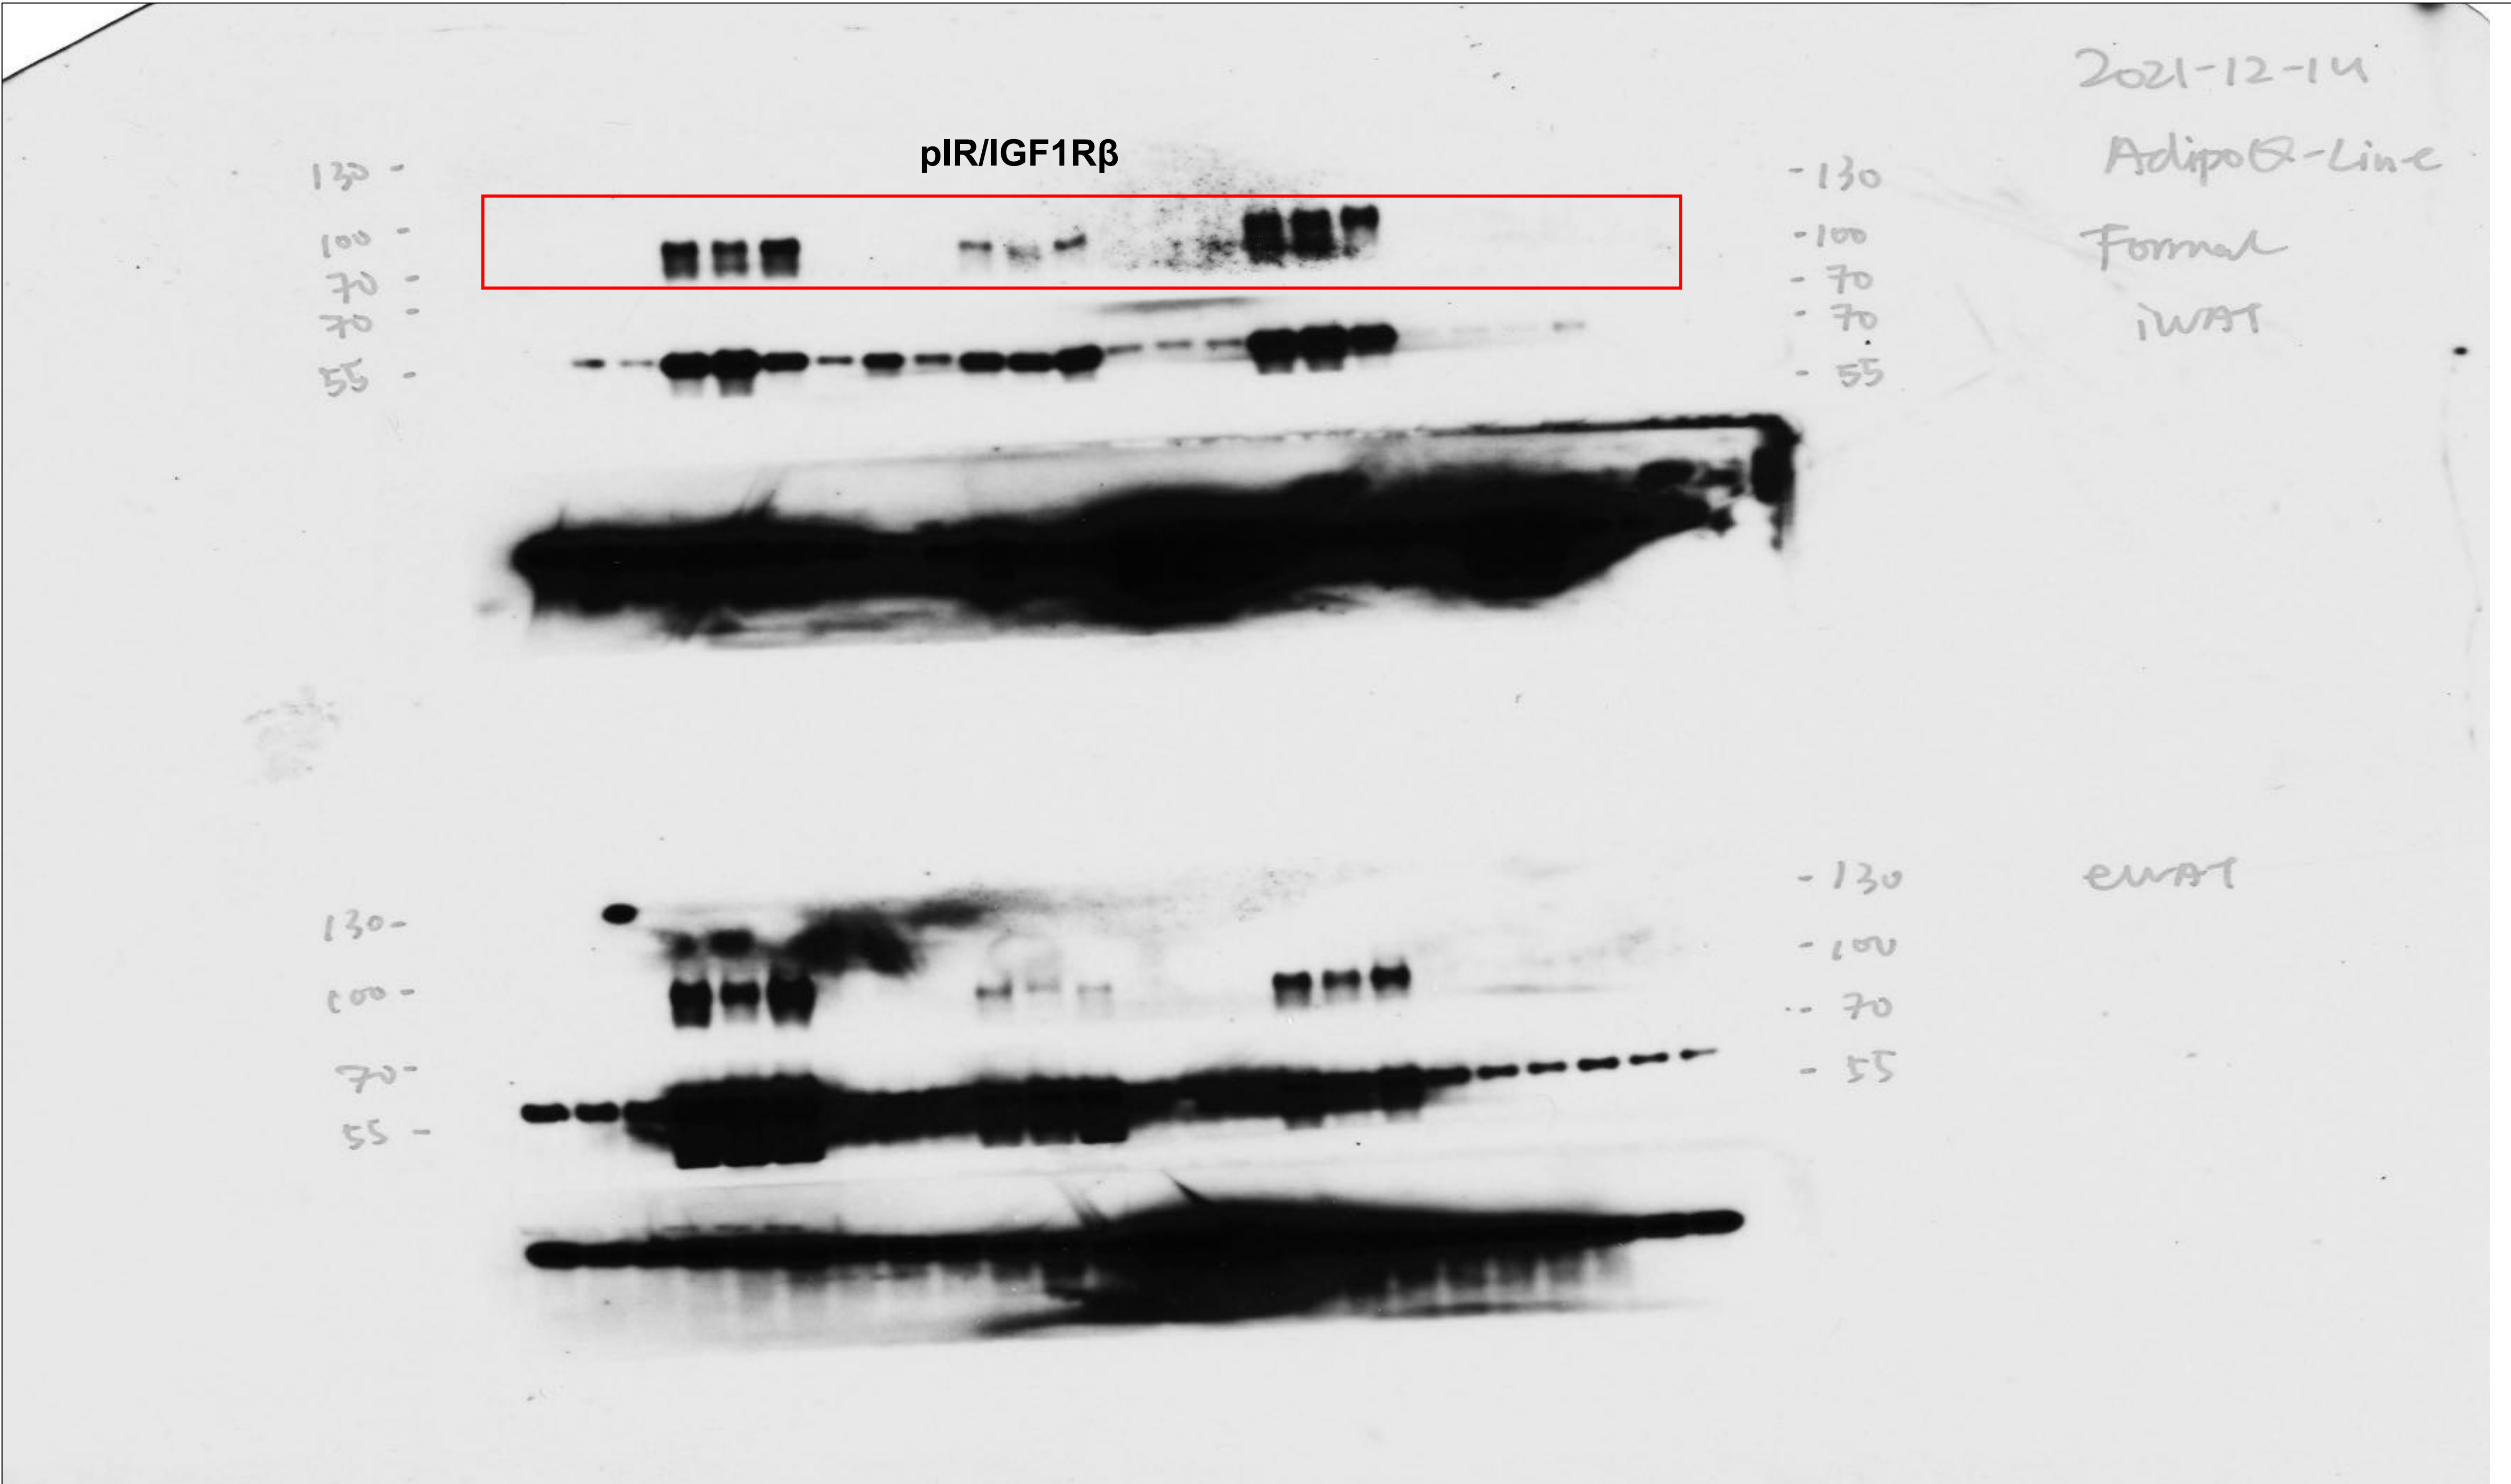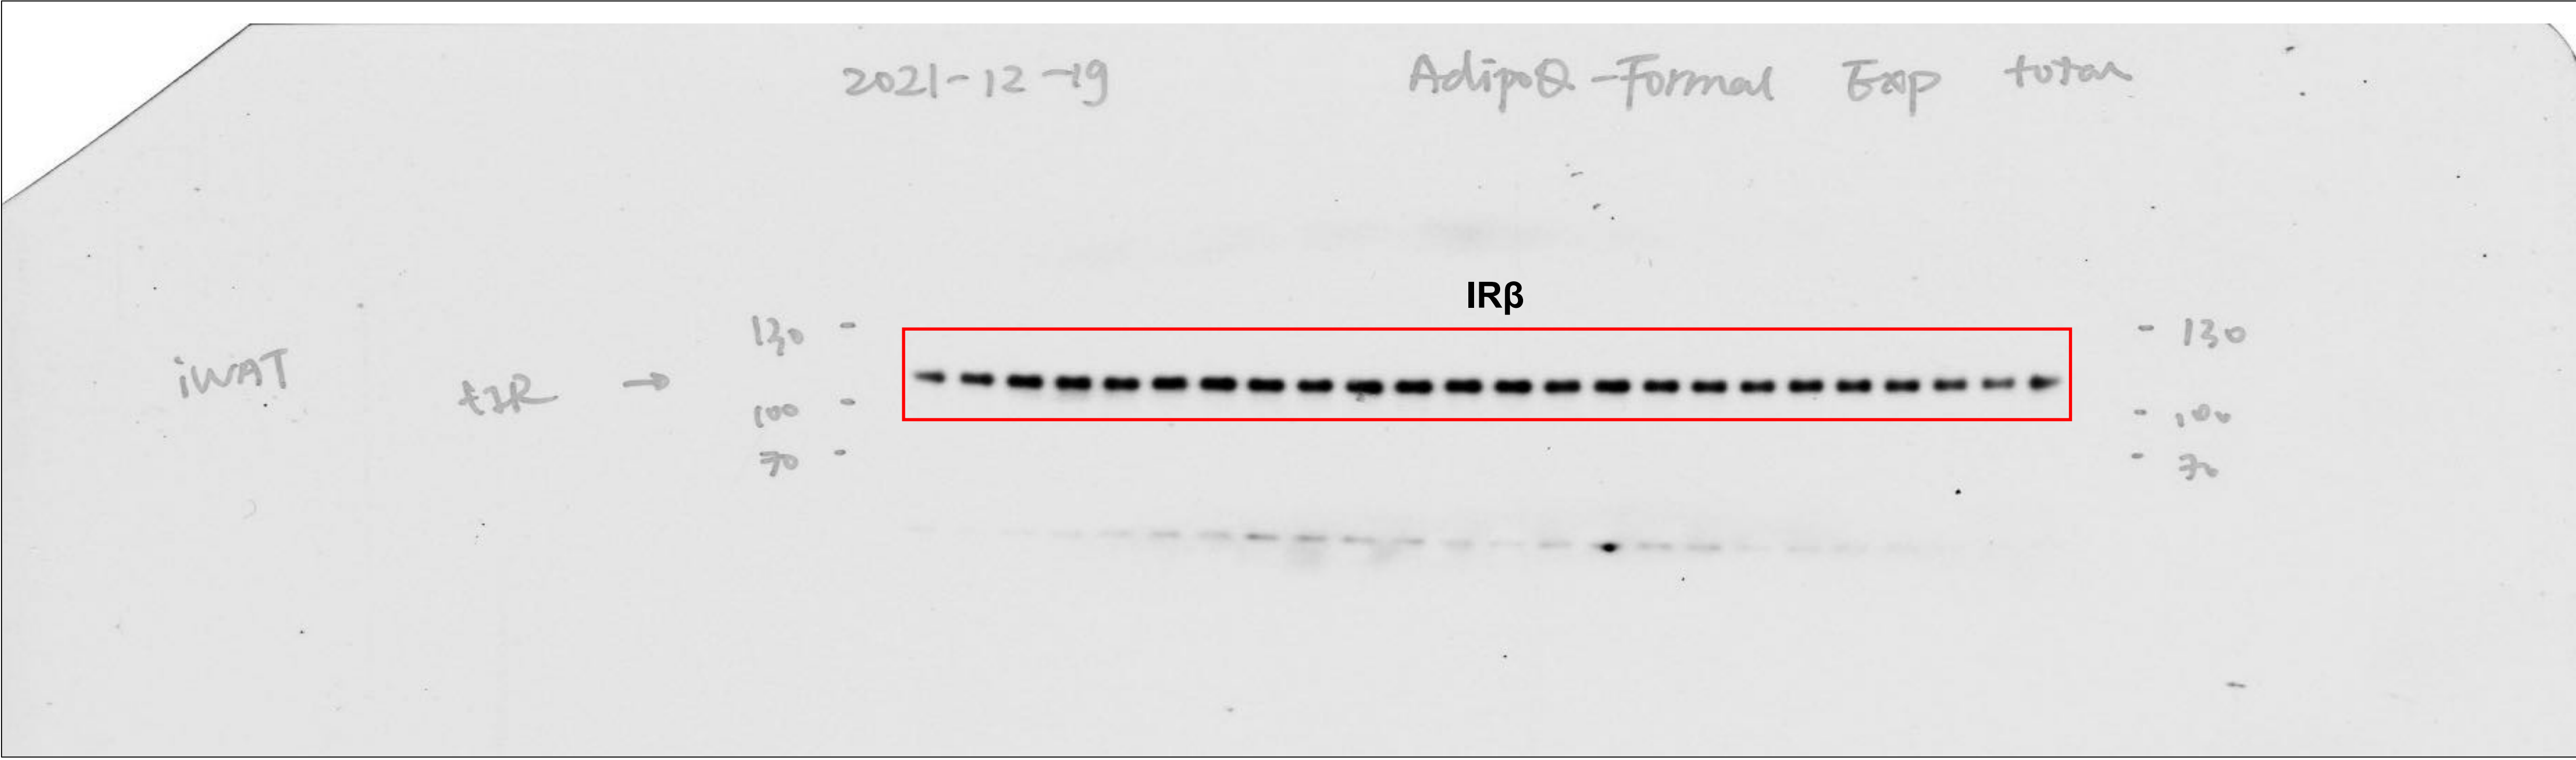



Figure 3b

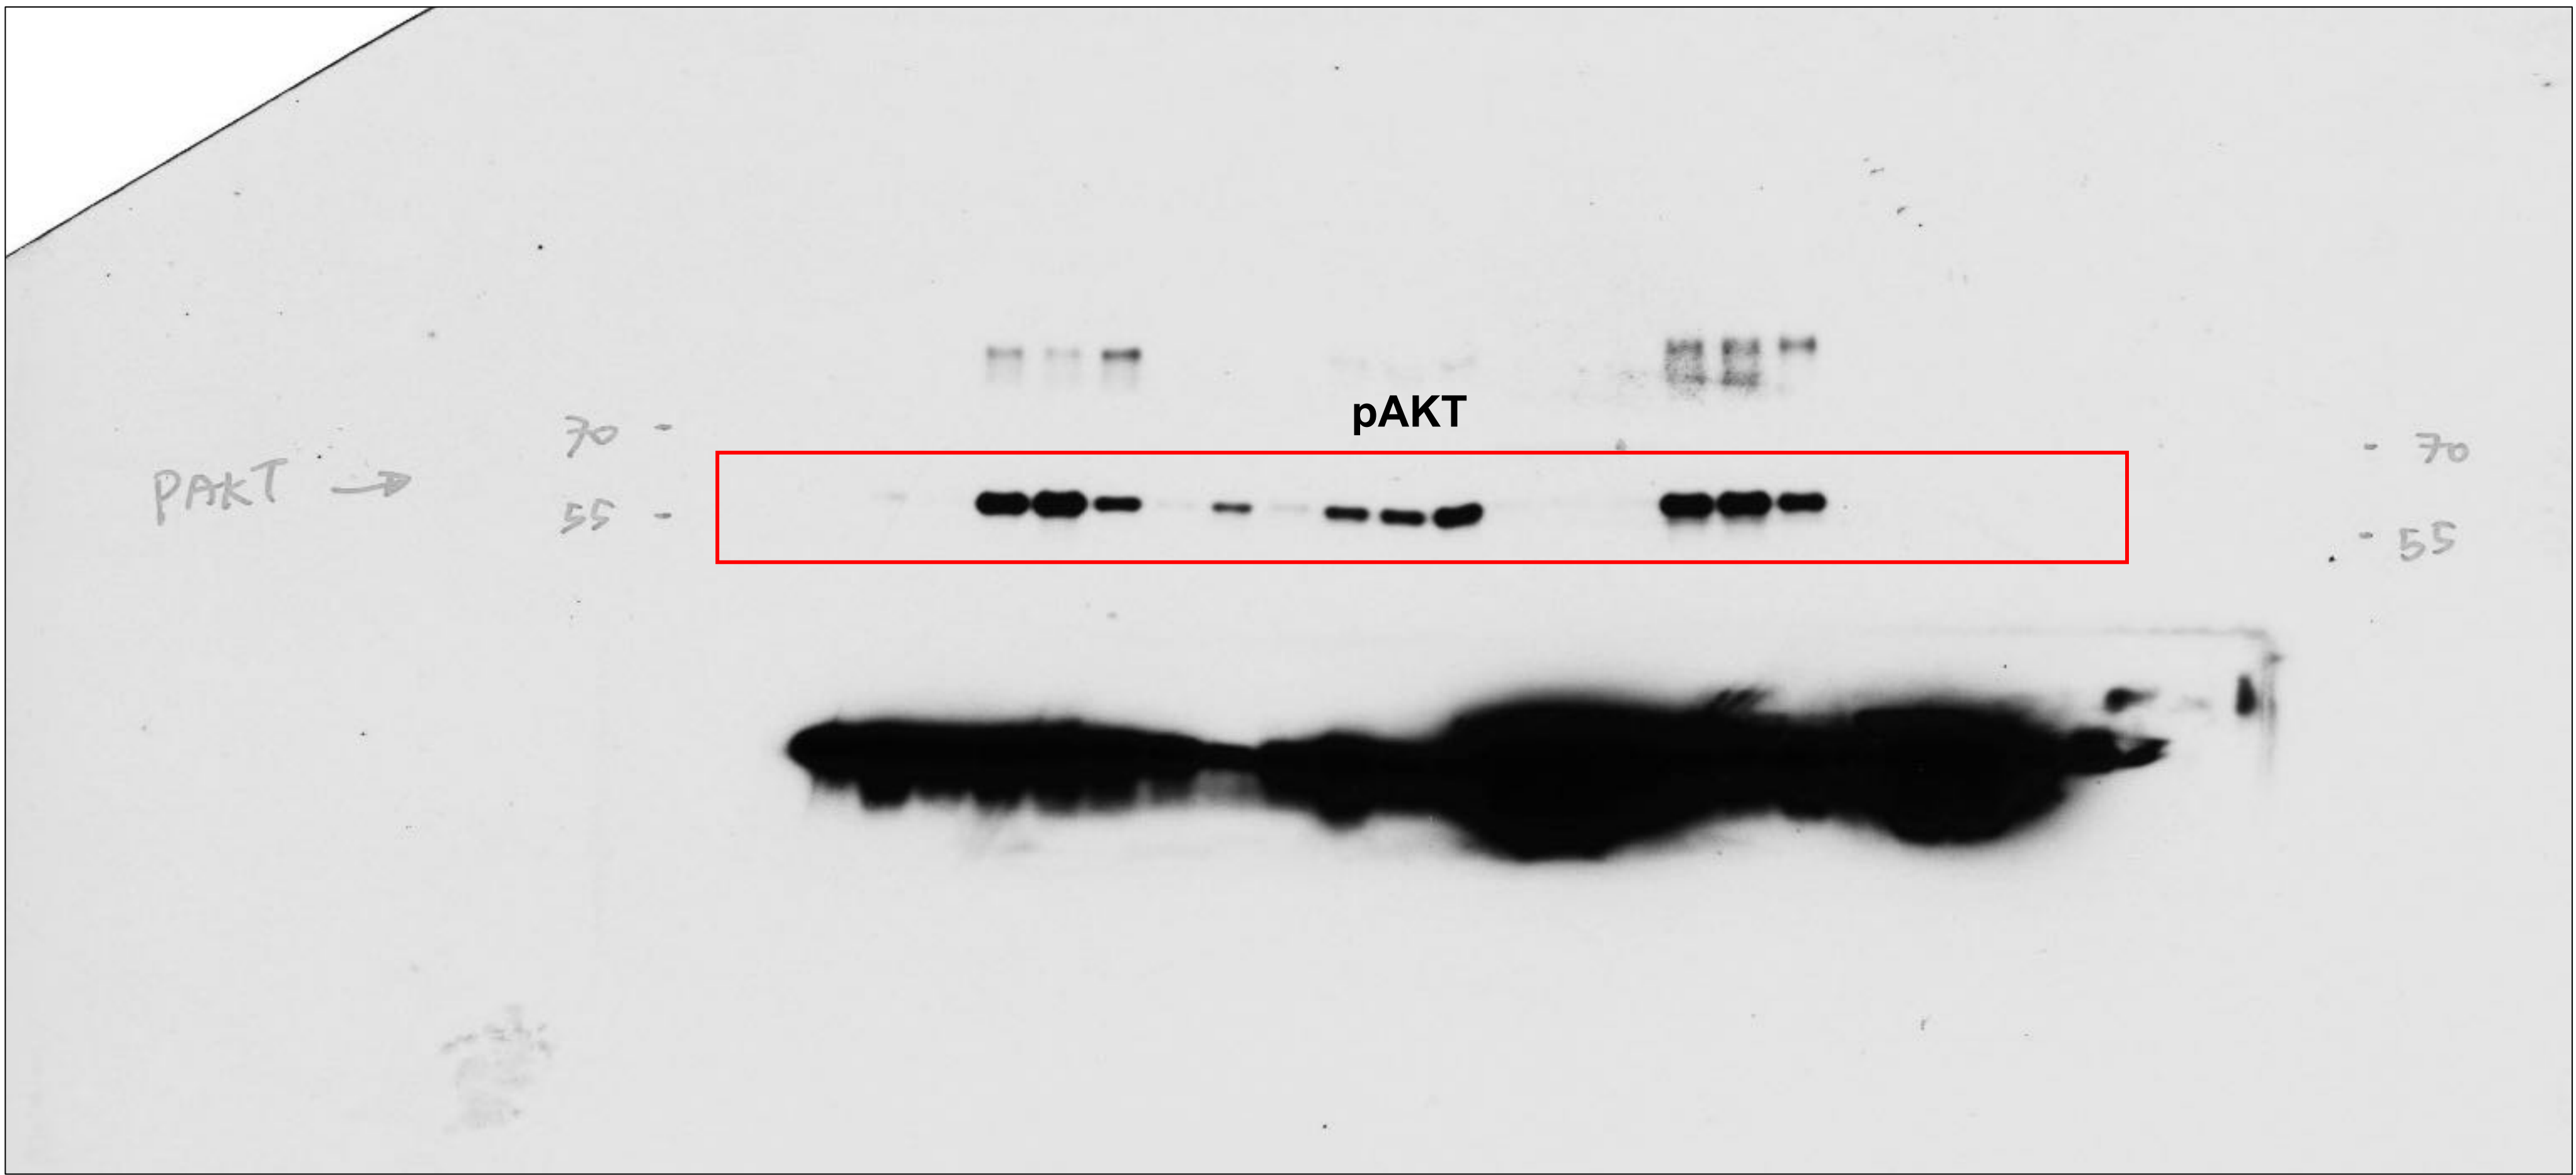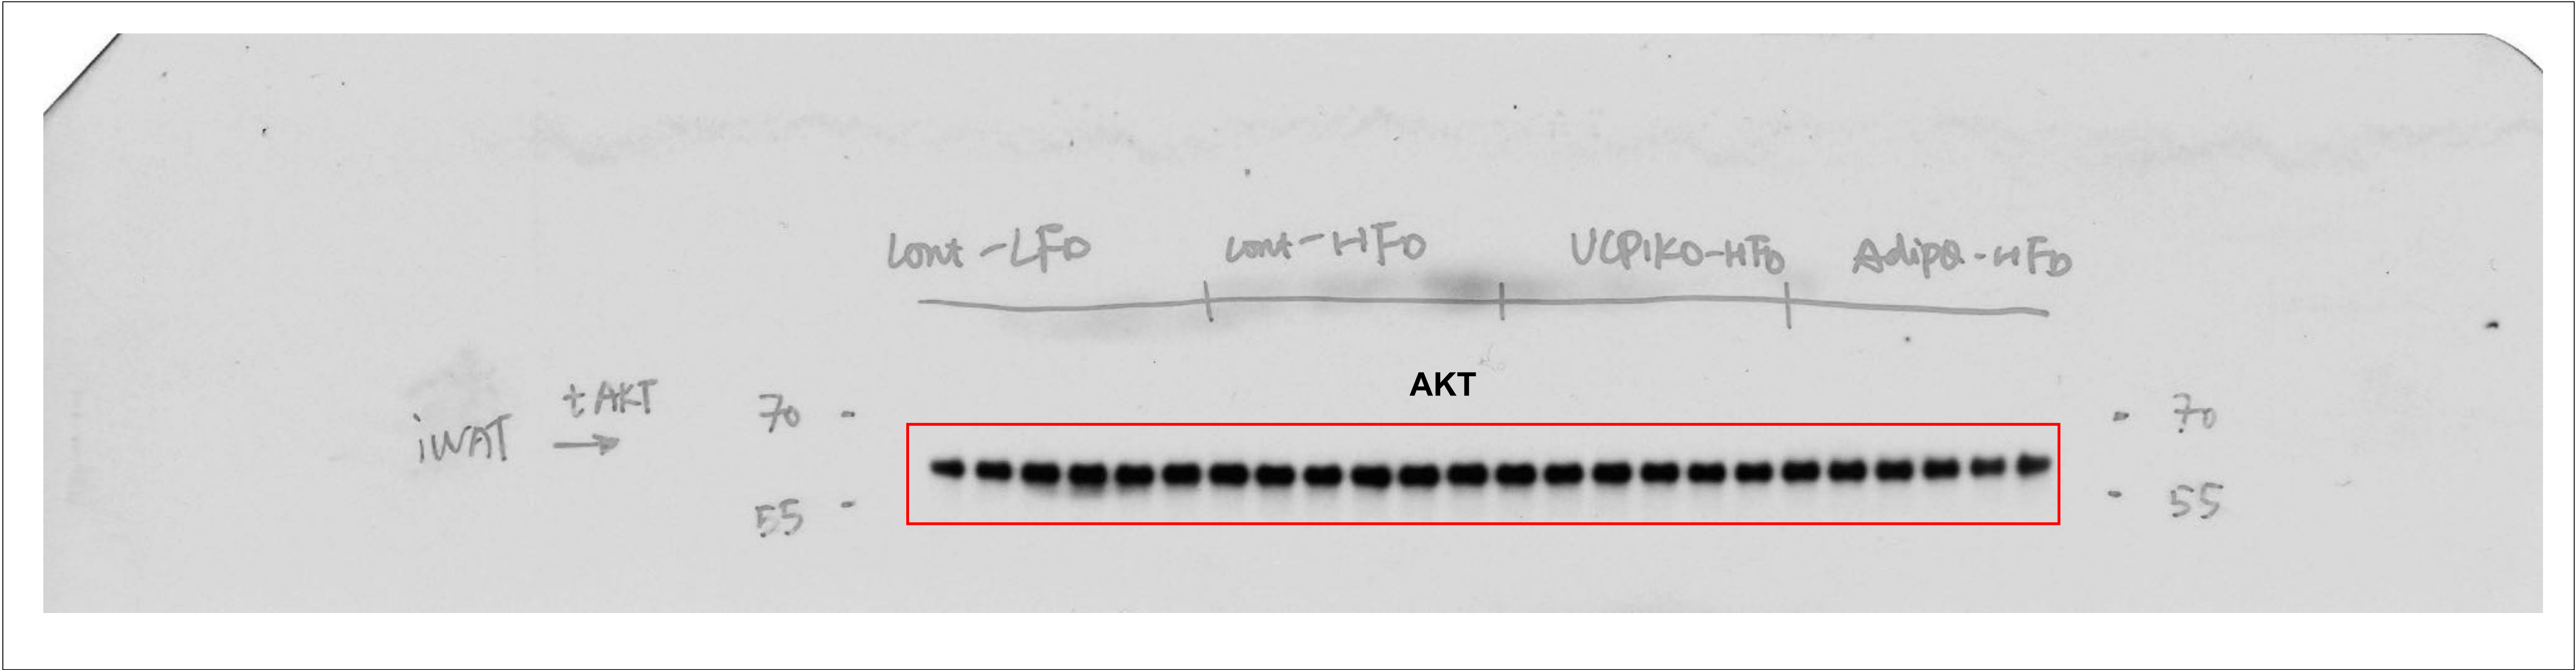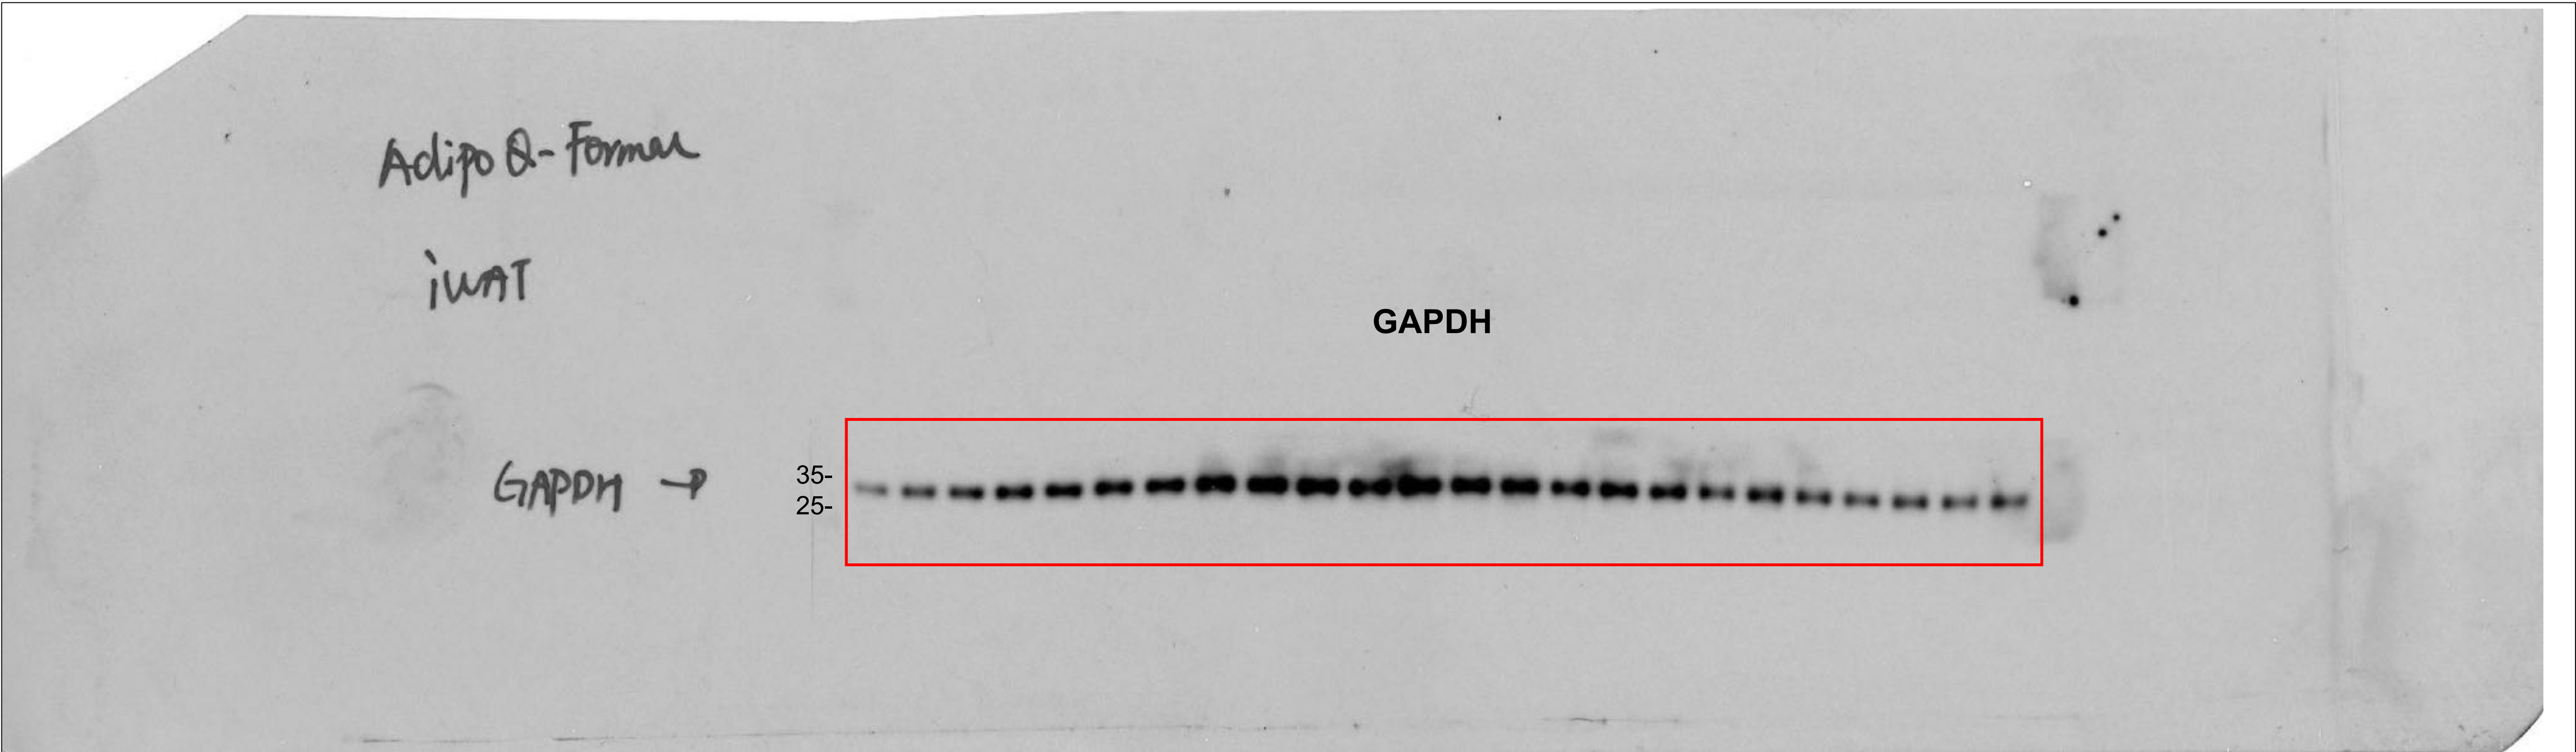



Figure 3c

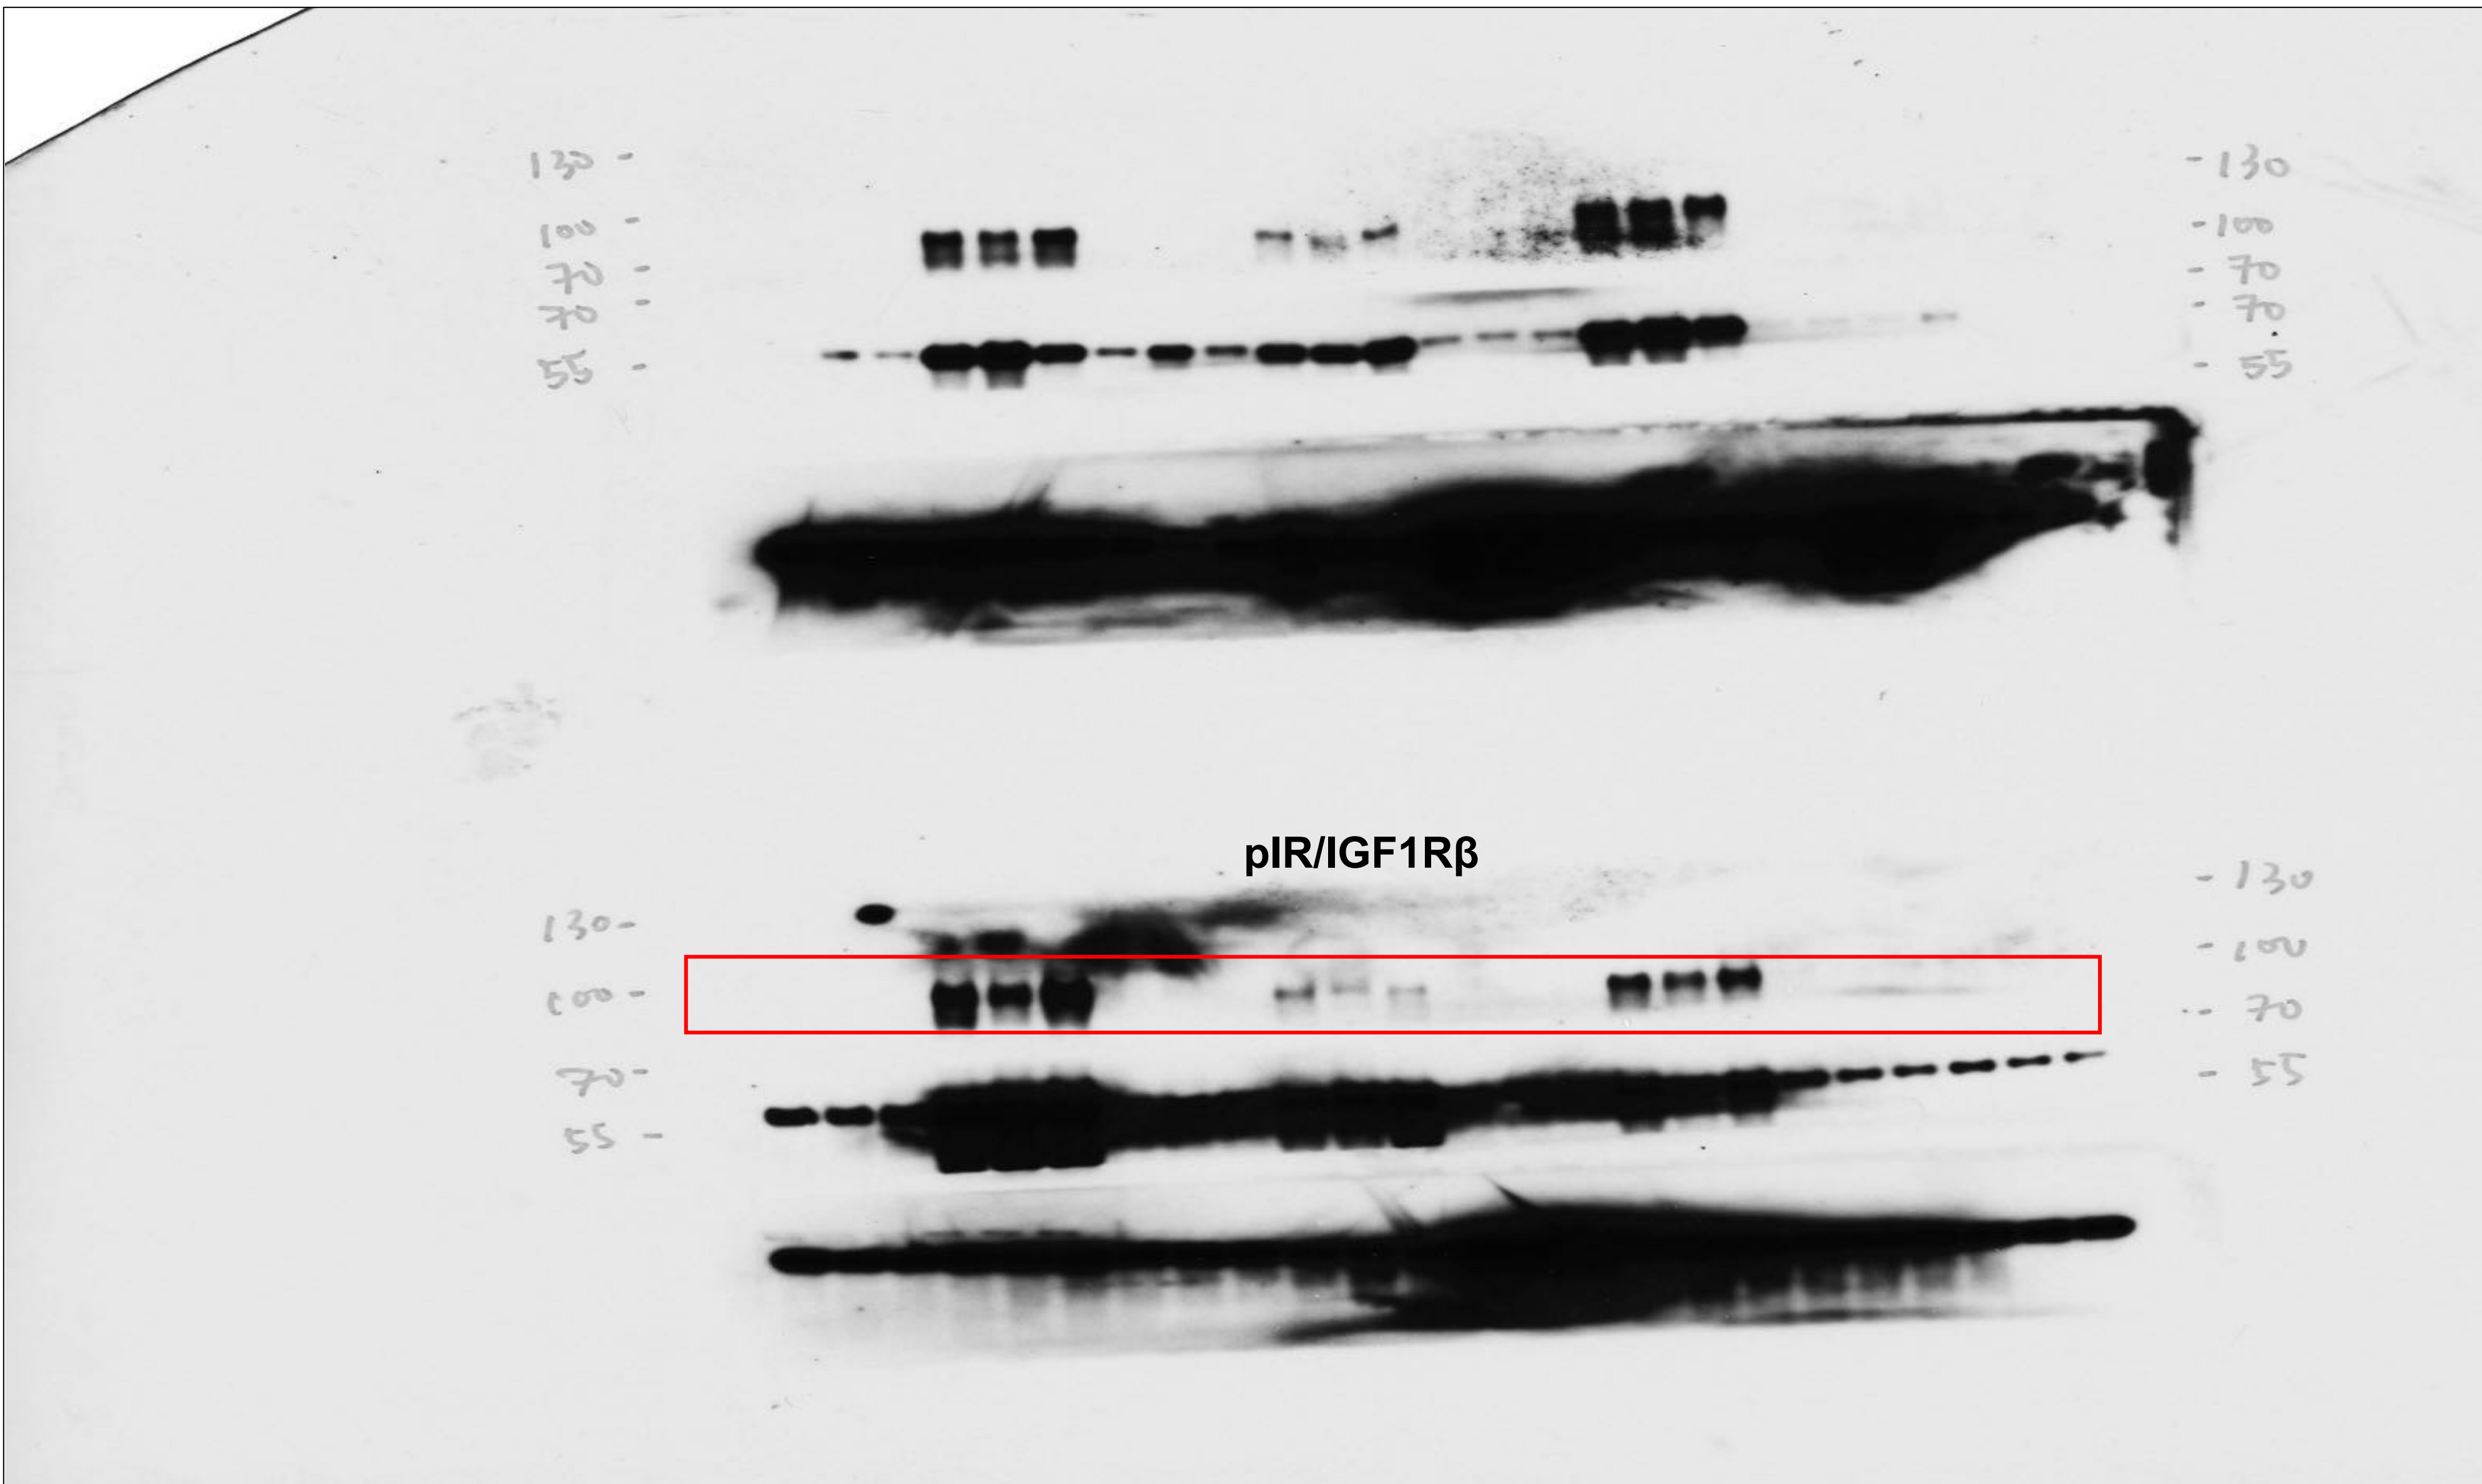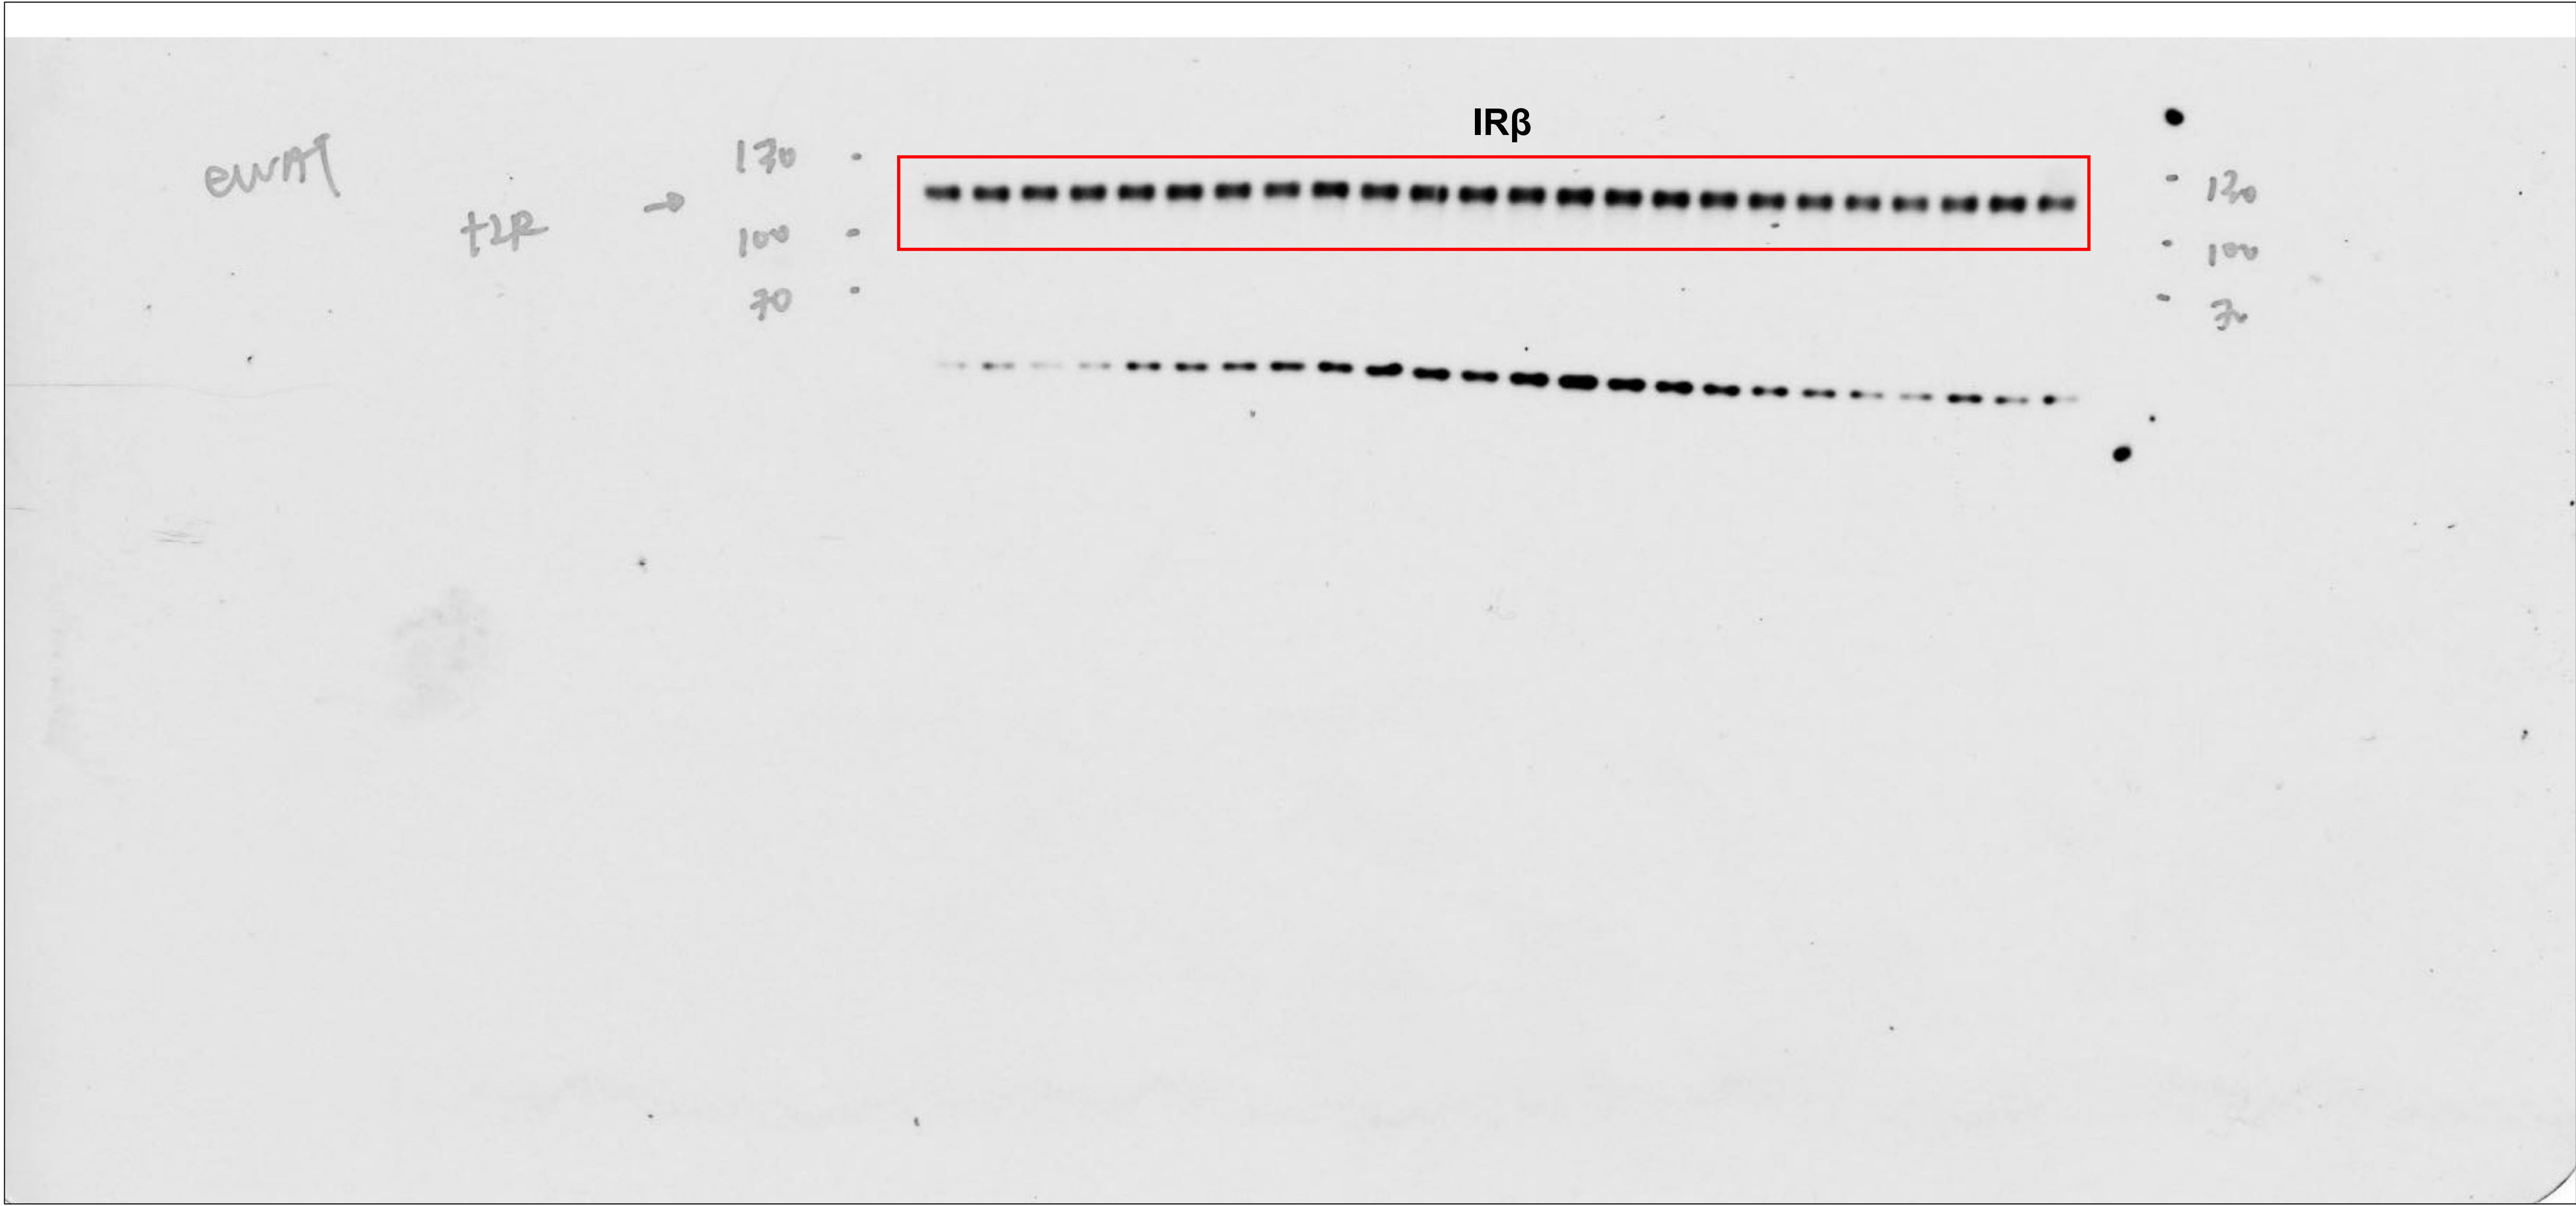

Figure 3c

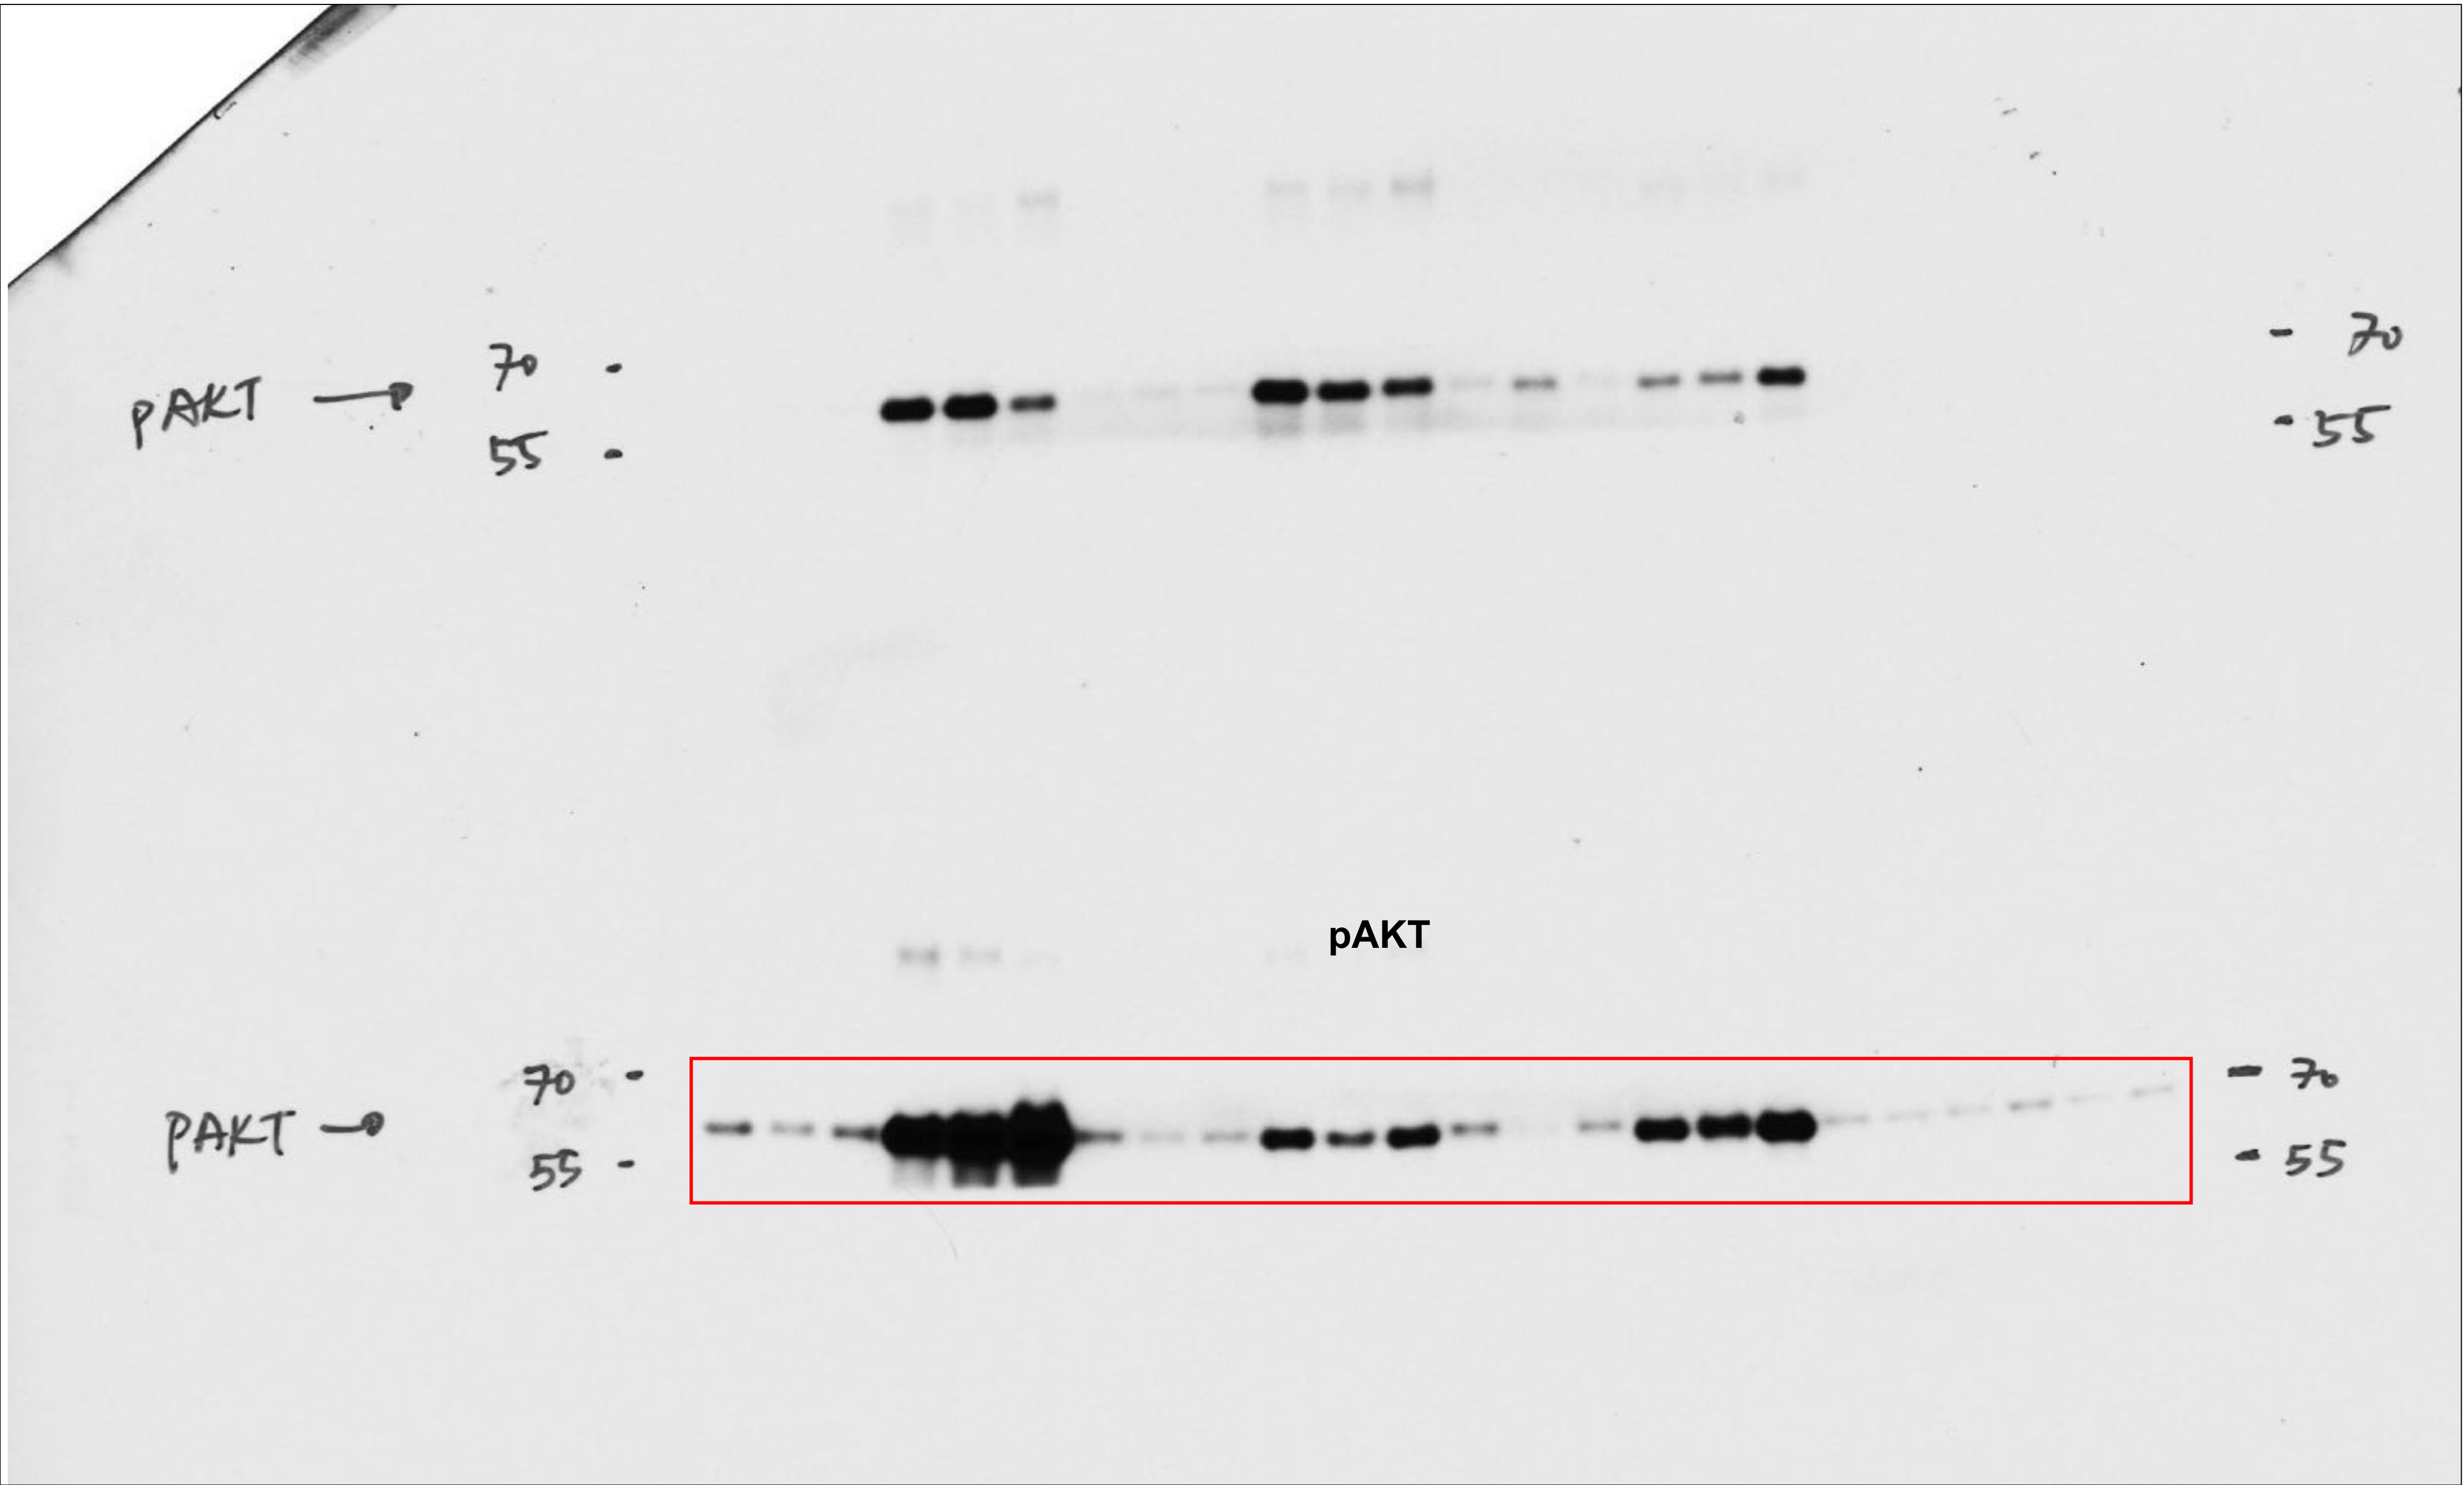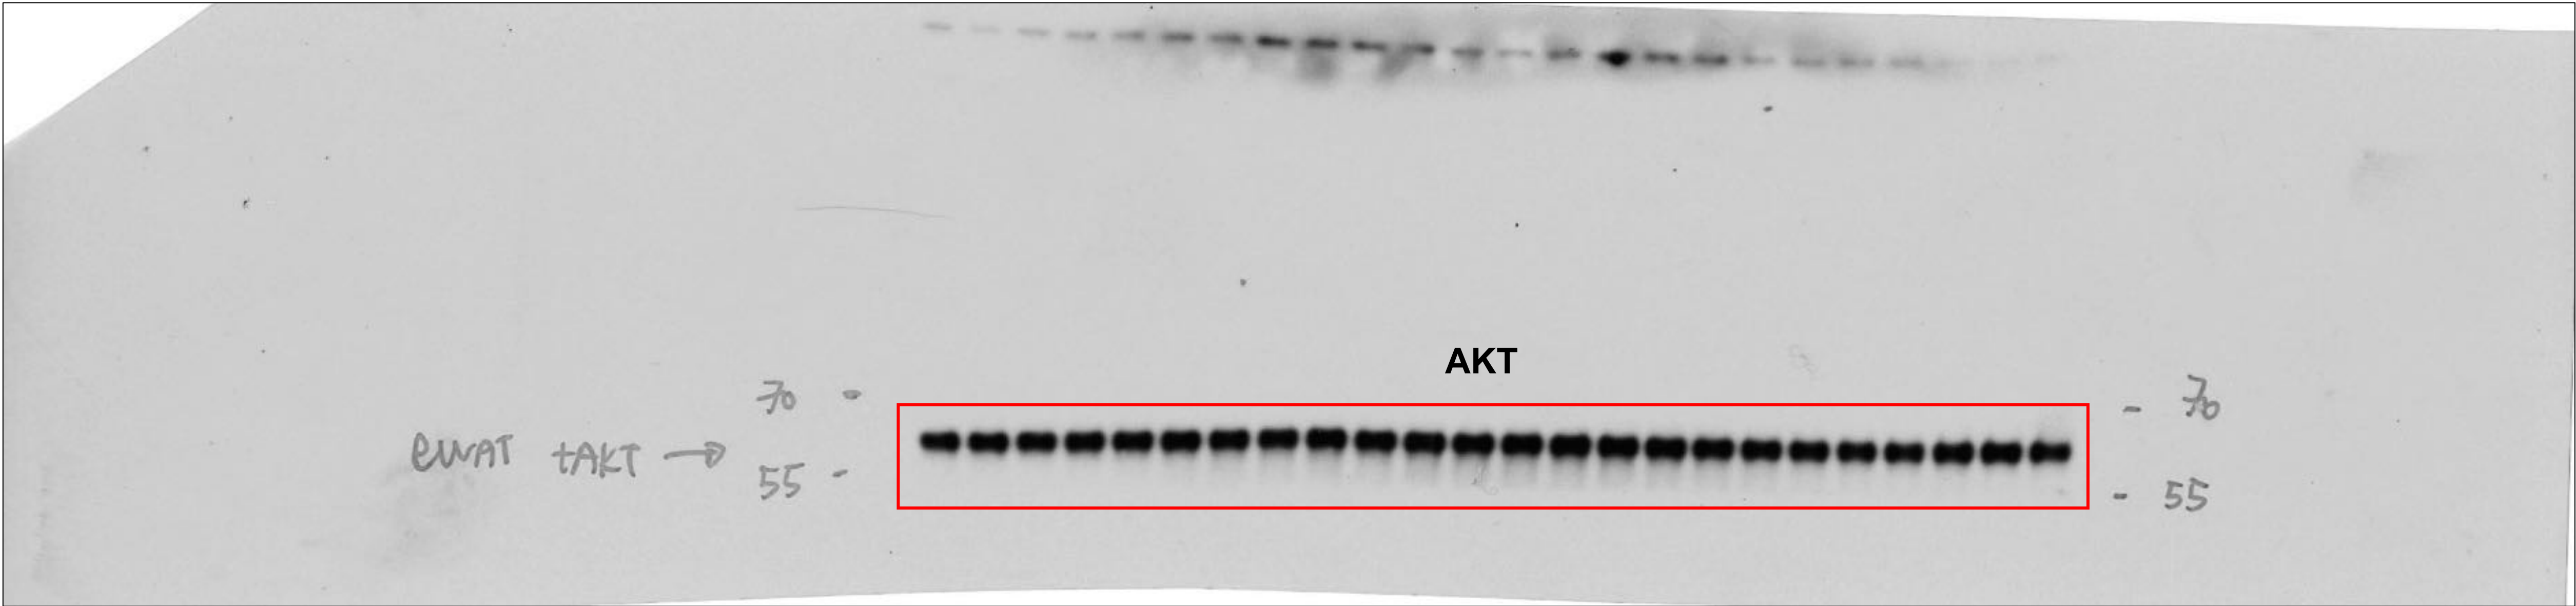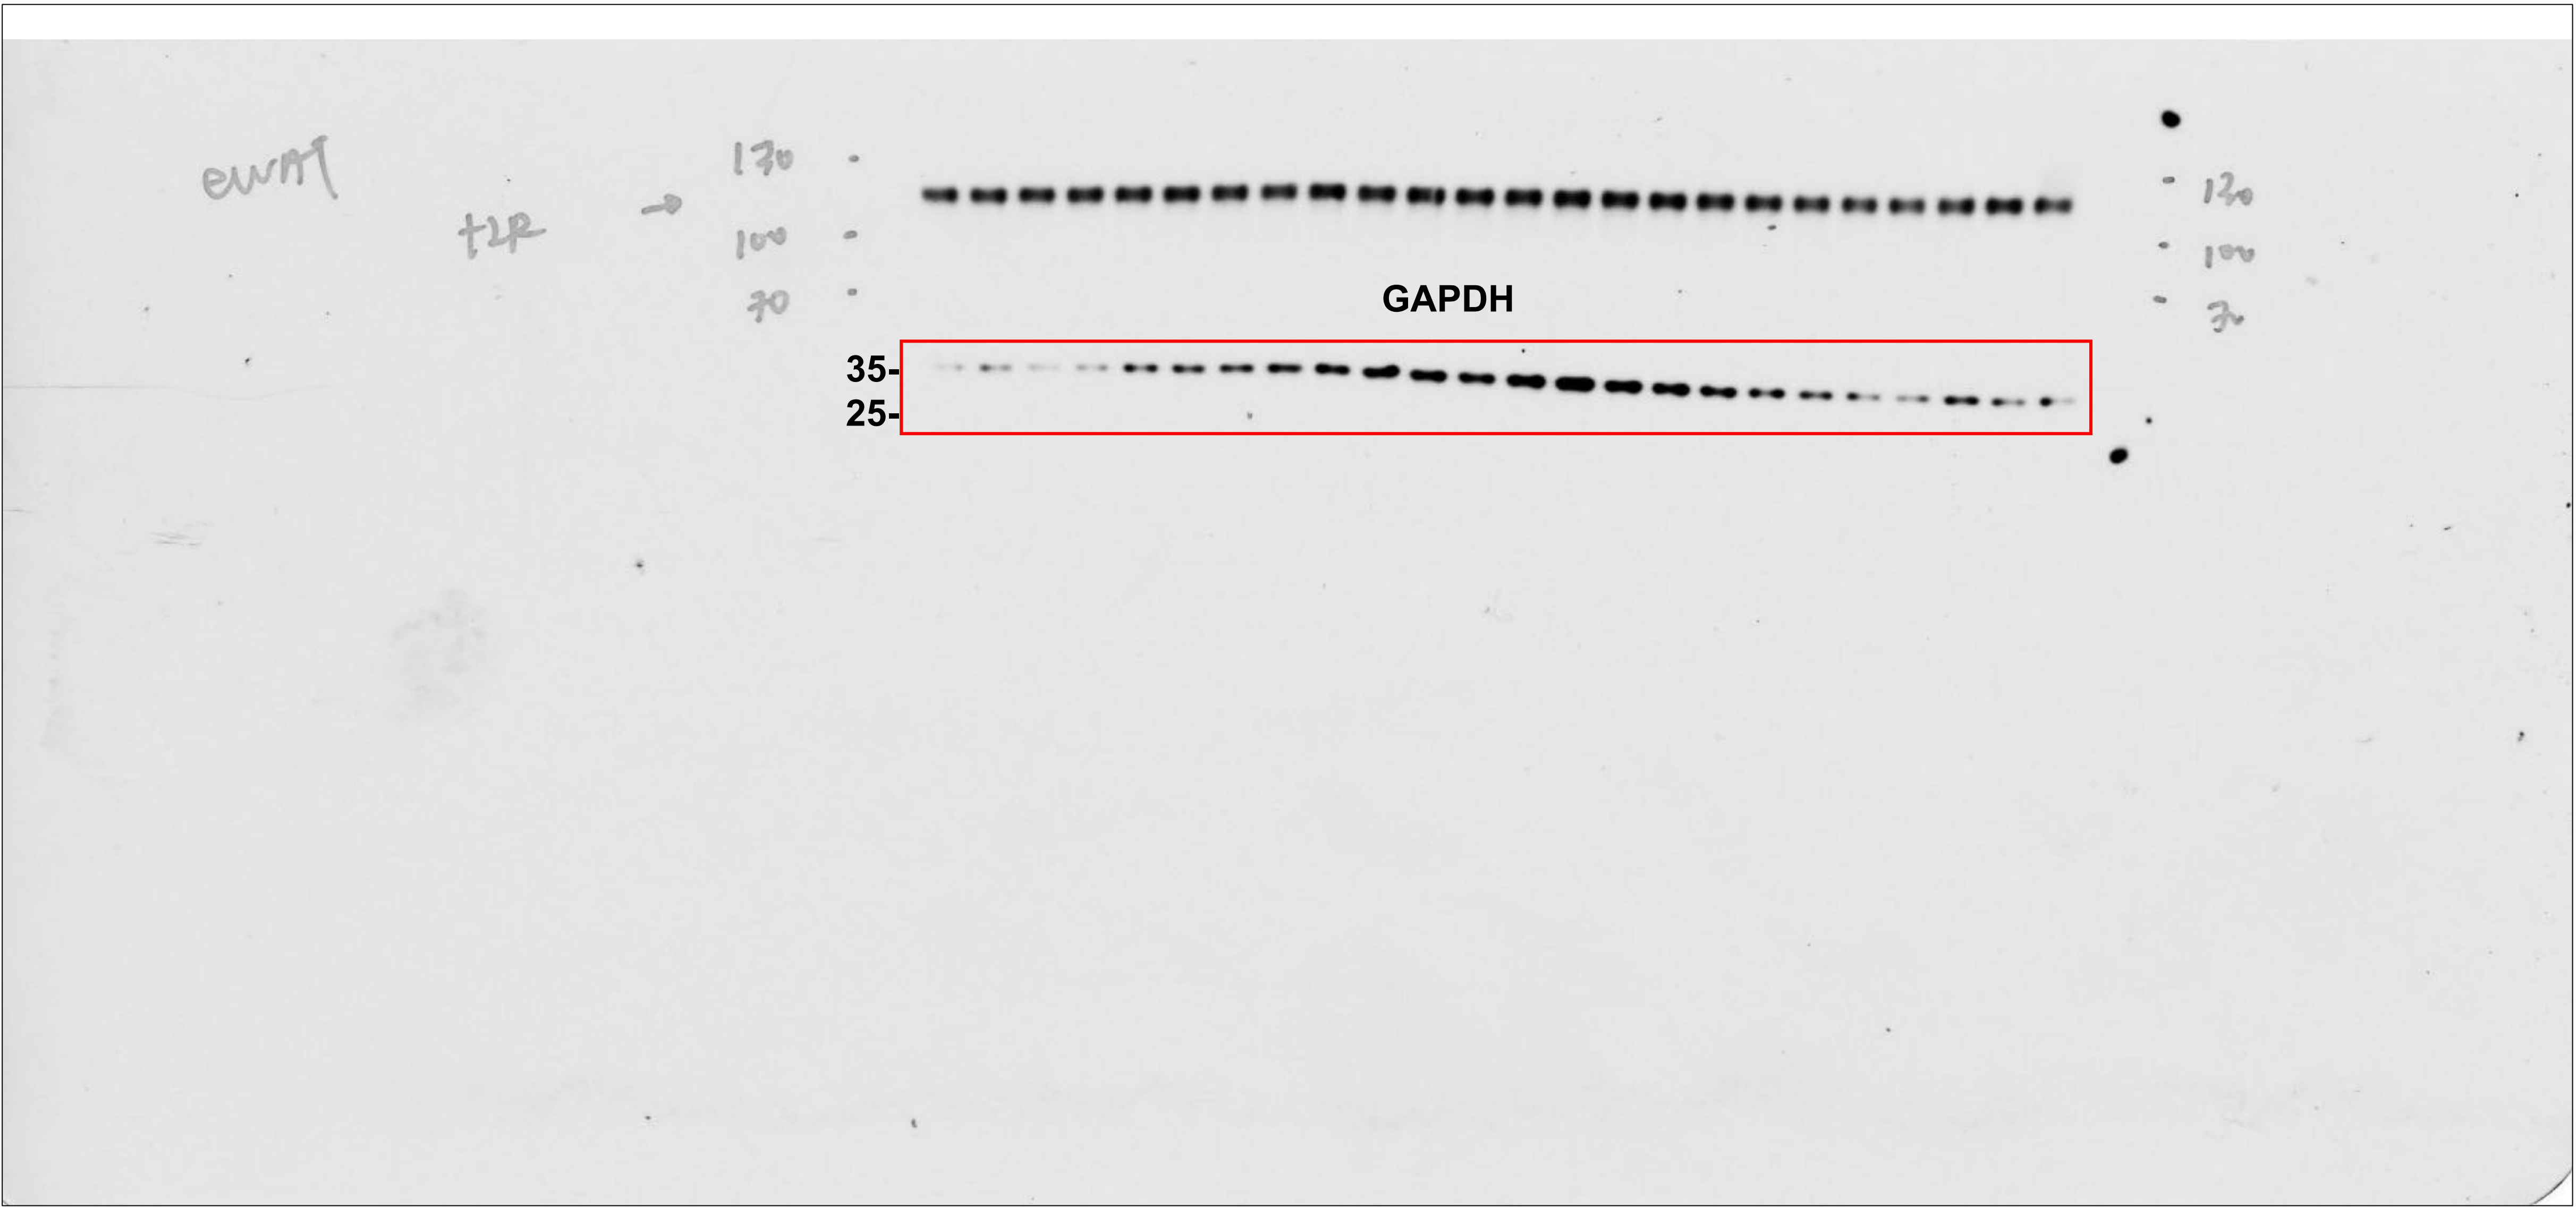



Figure 3d

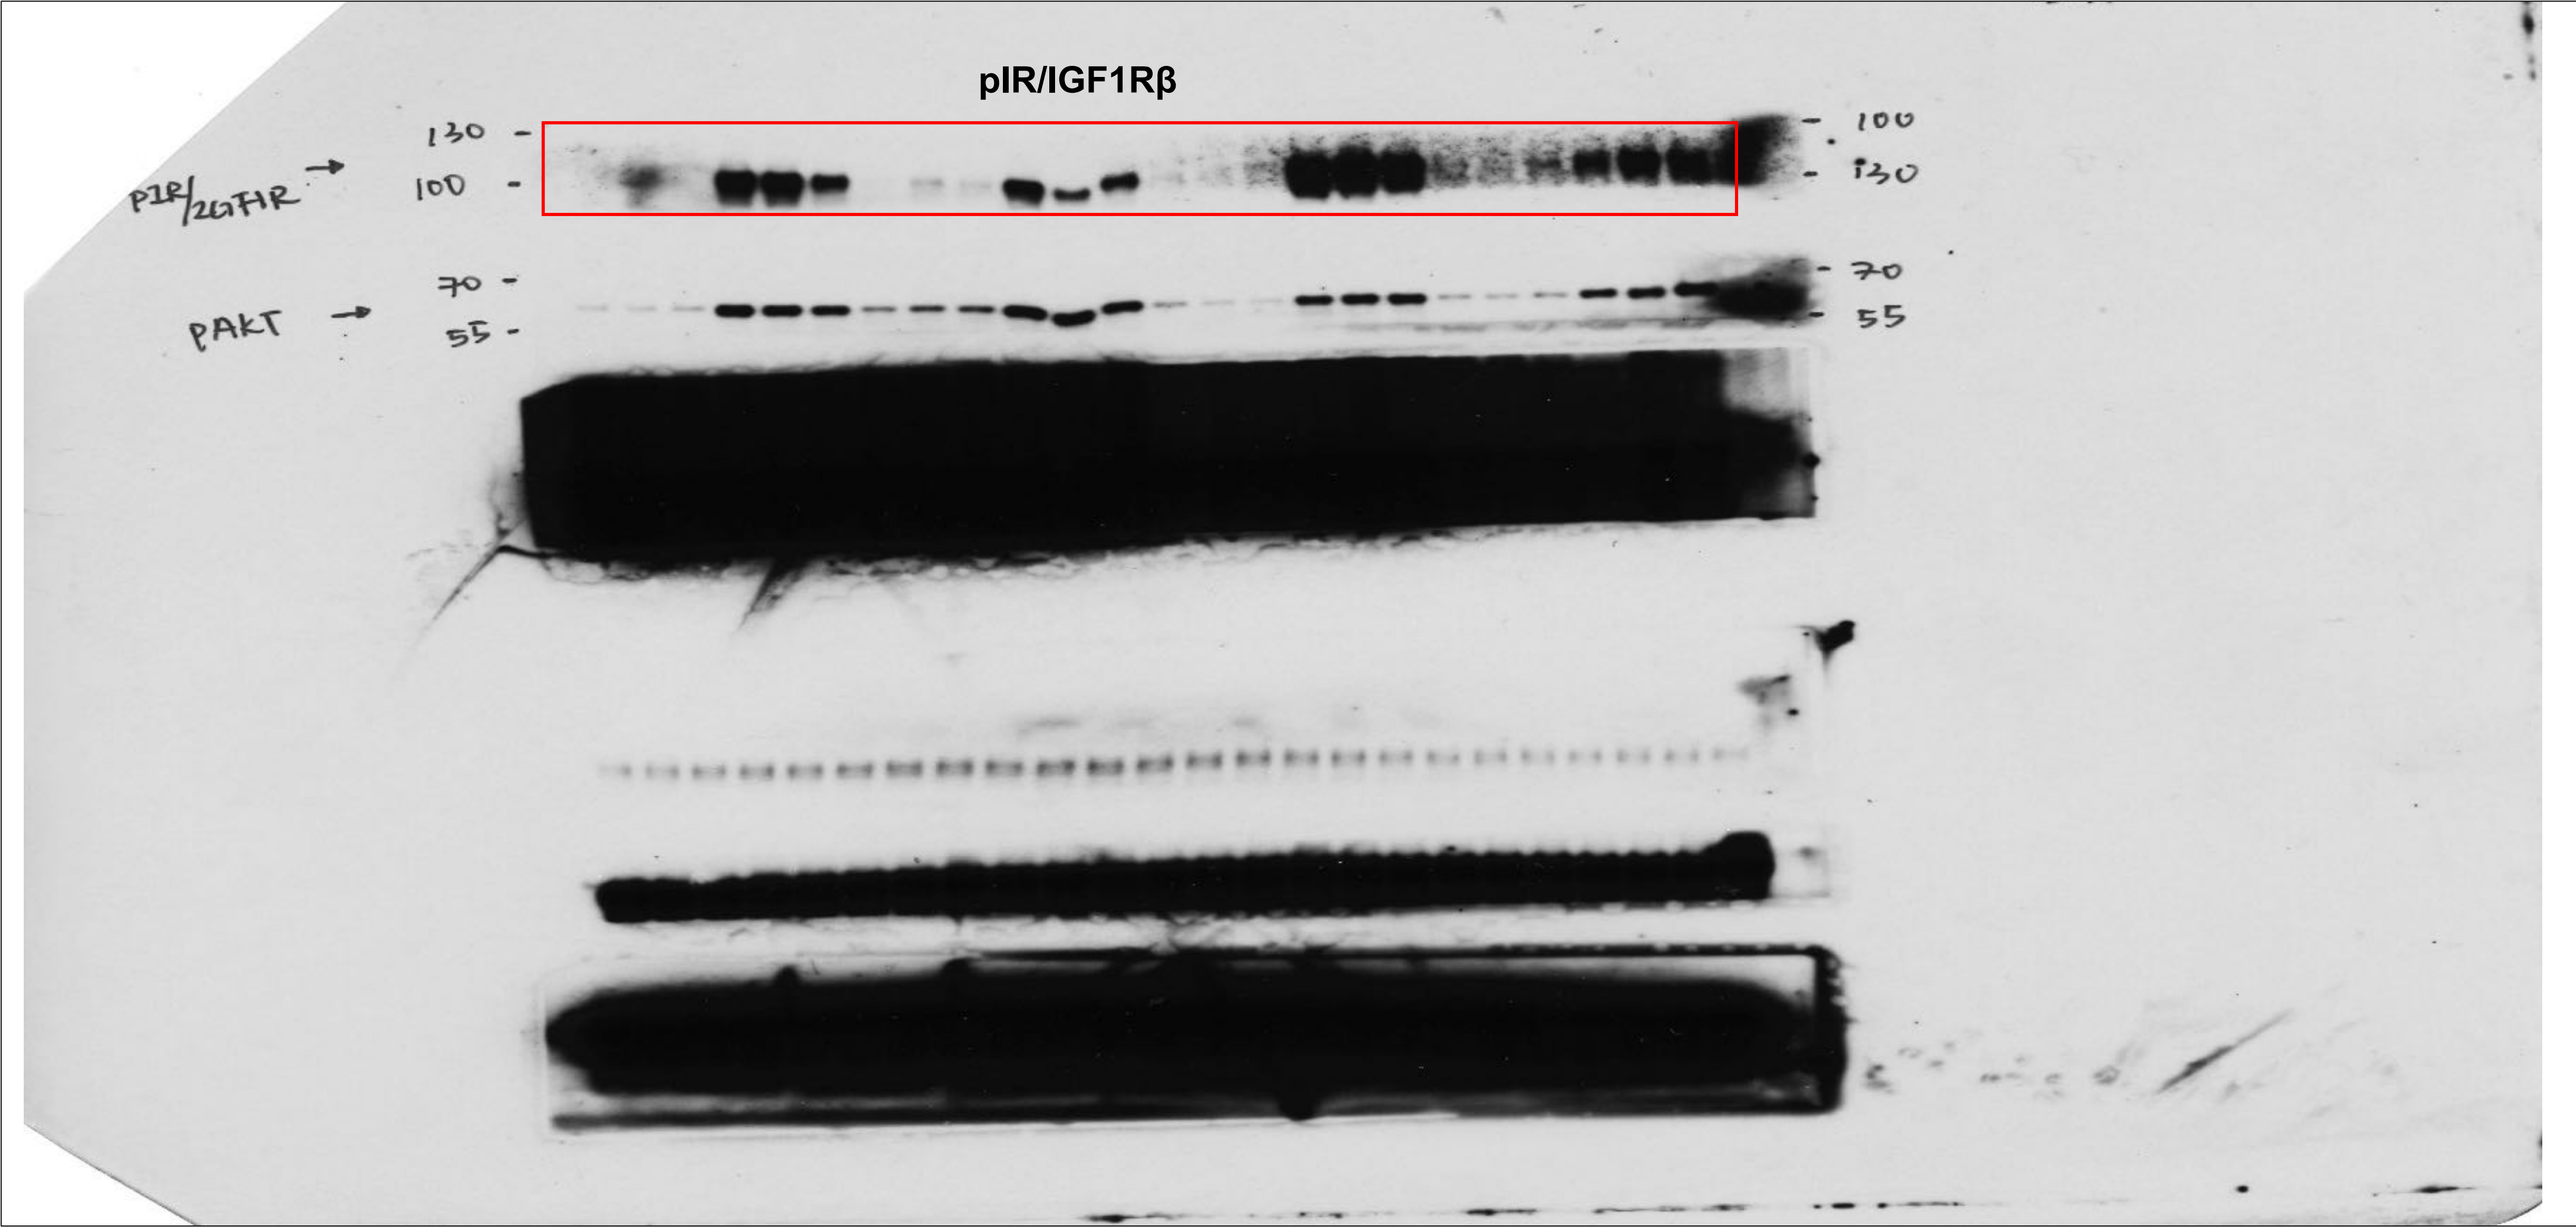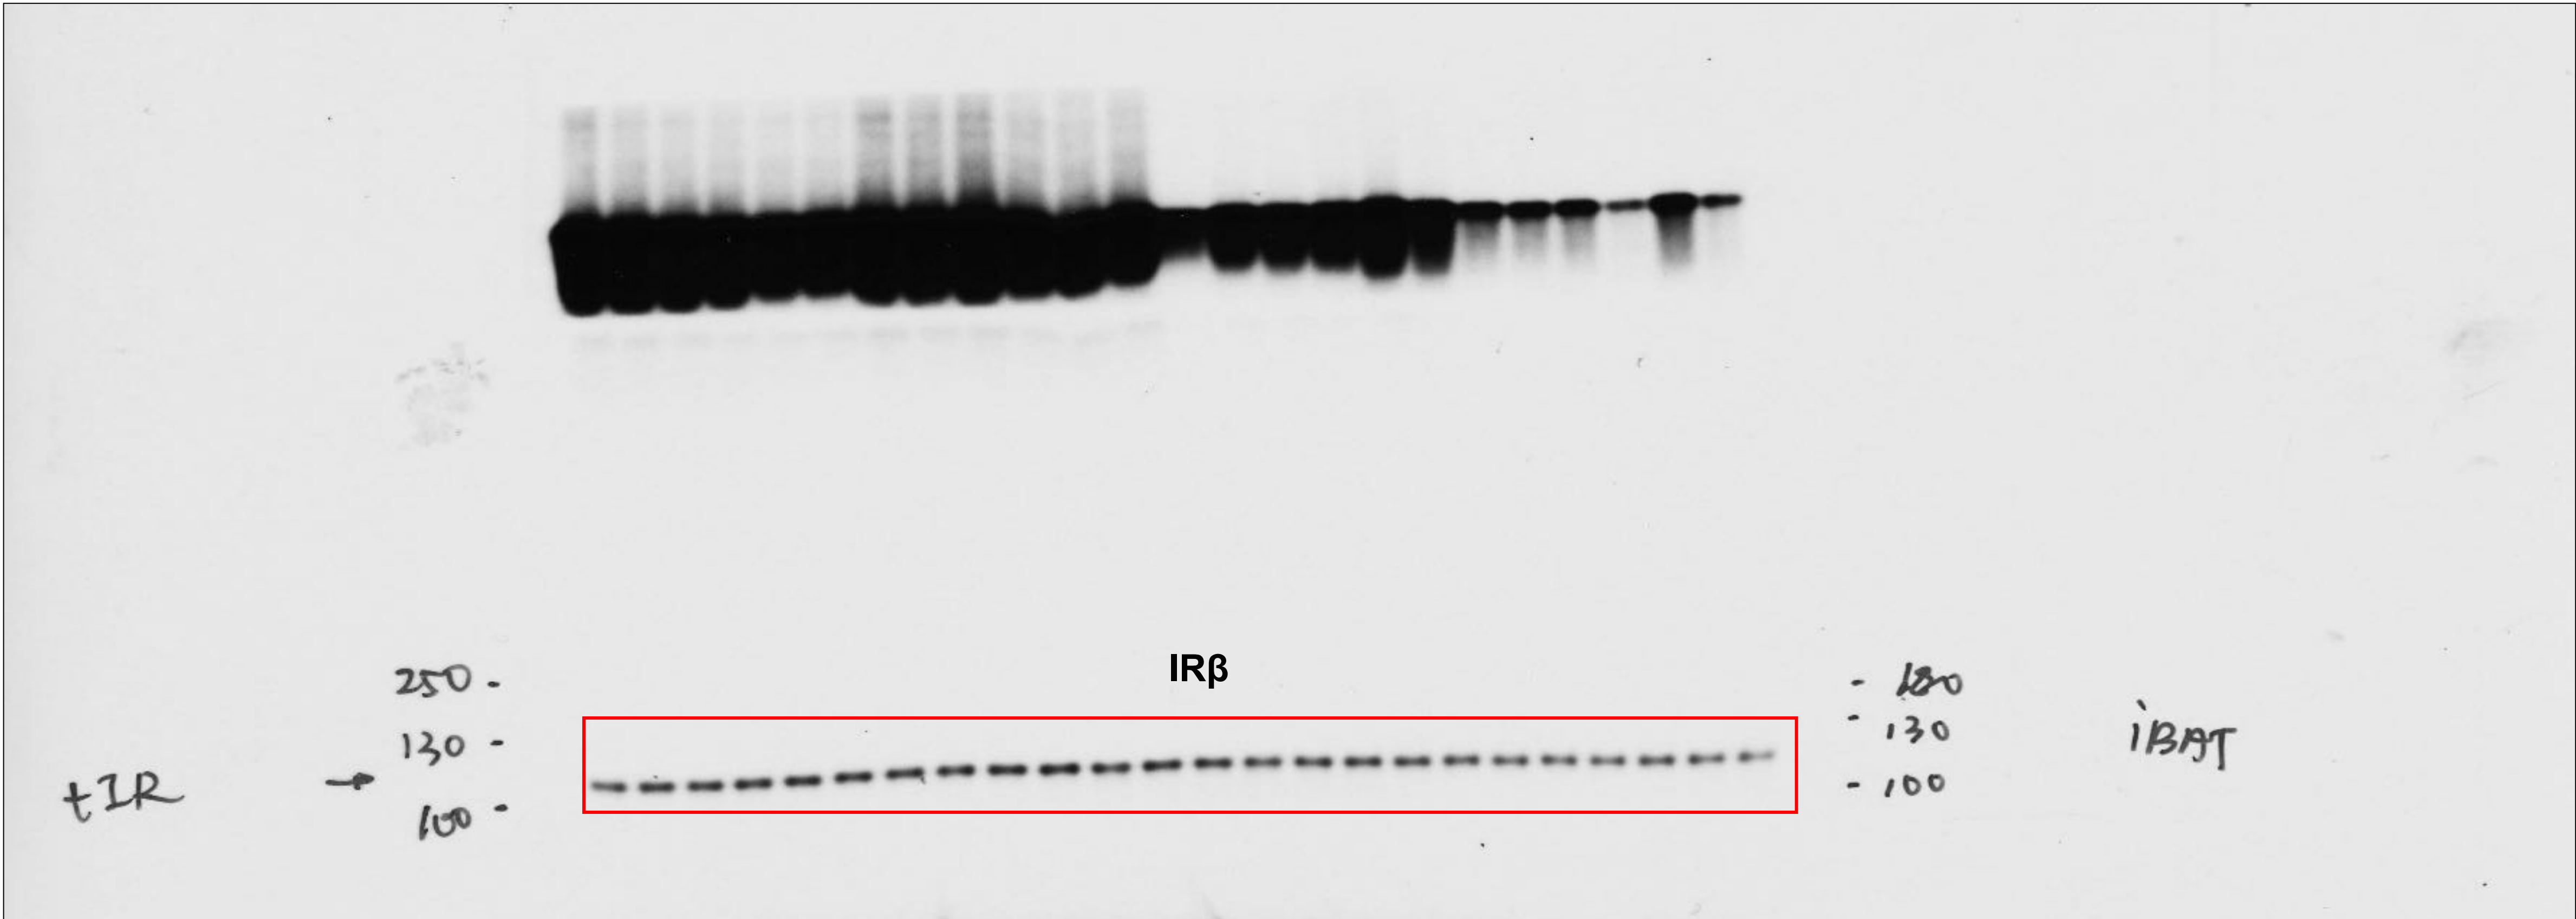



Figure 3d

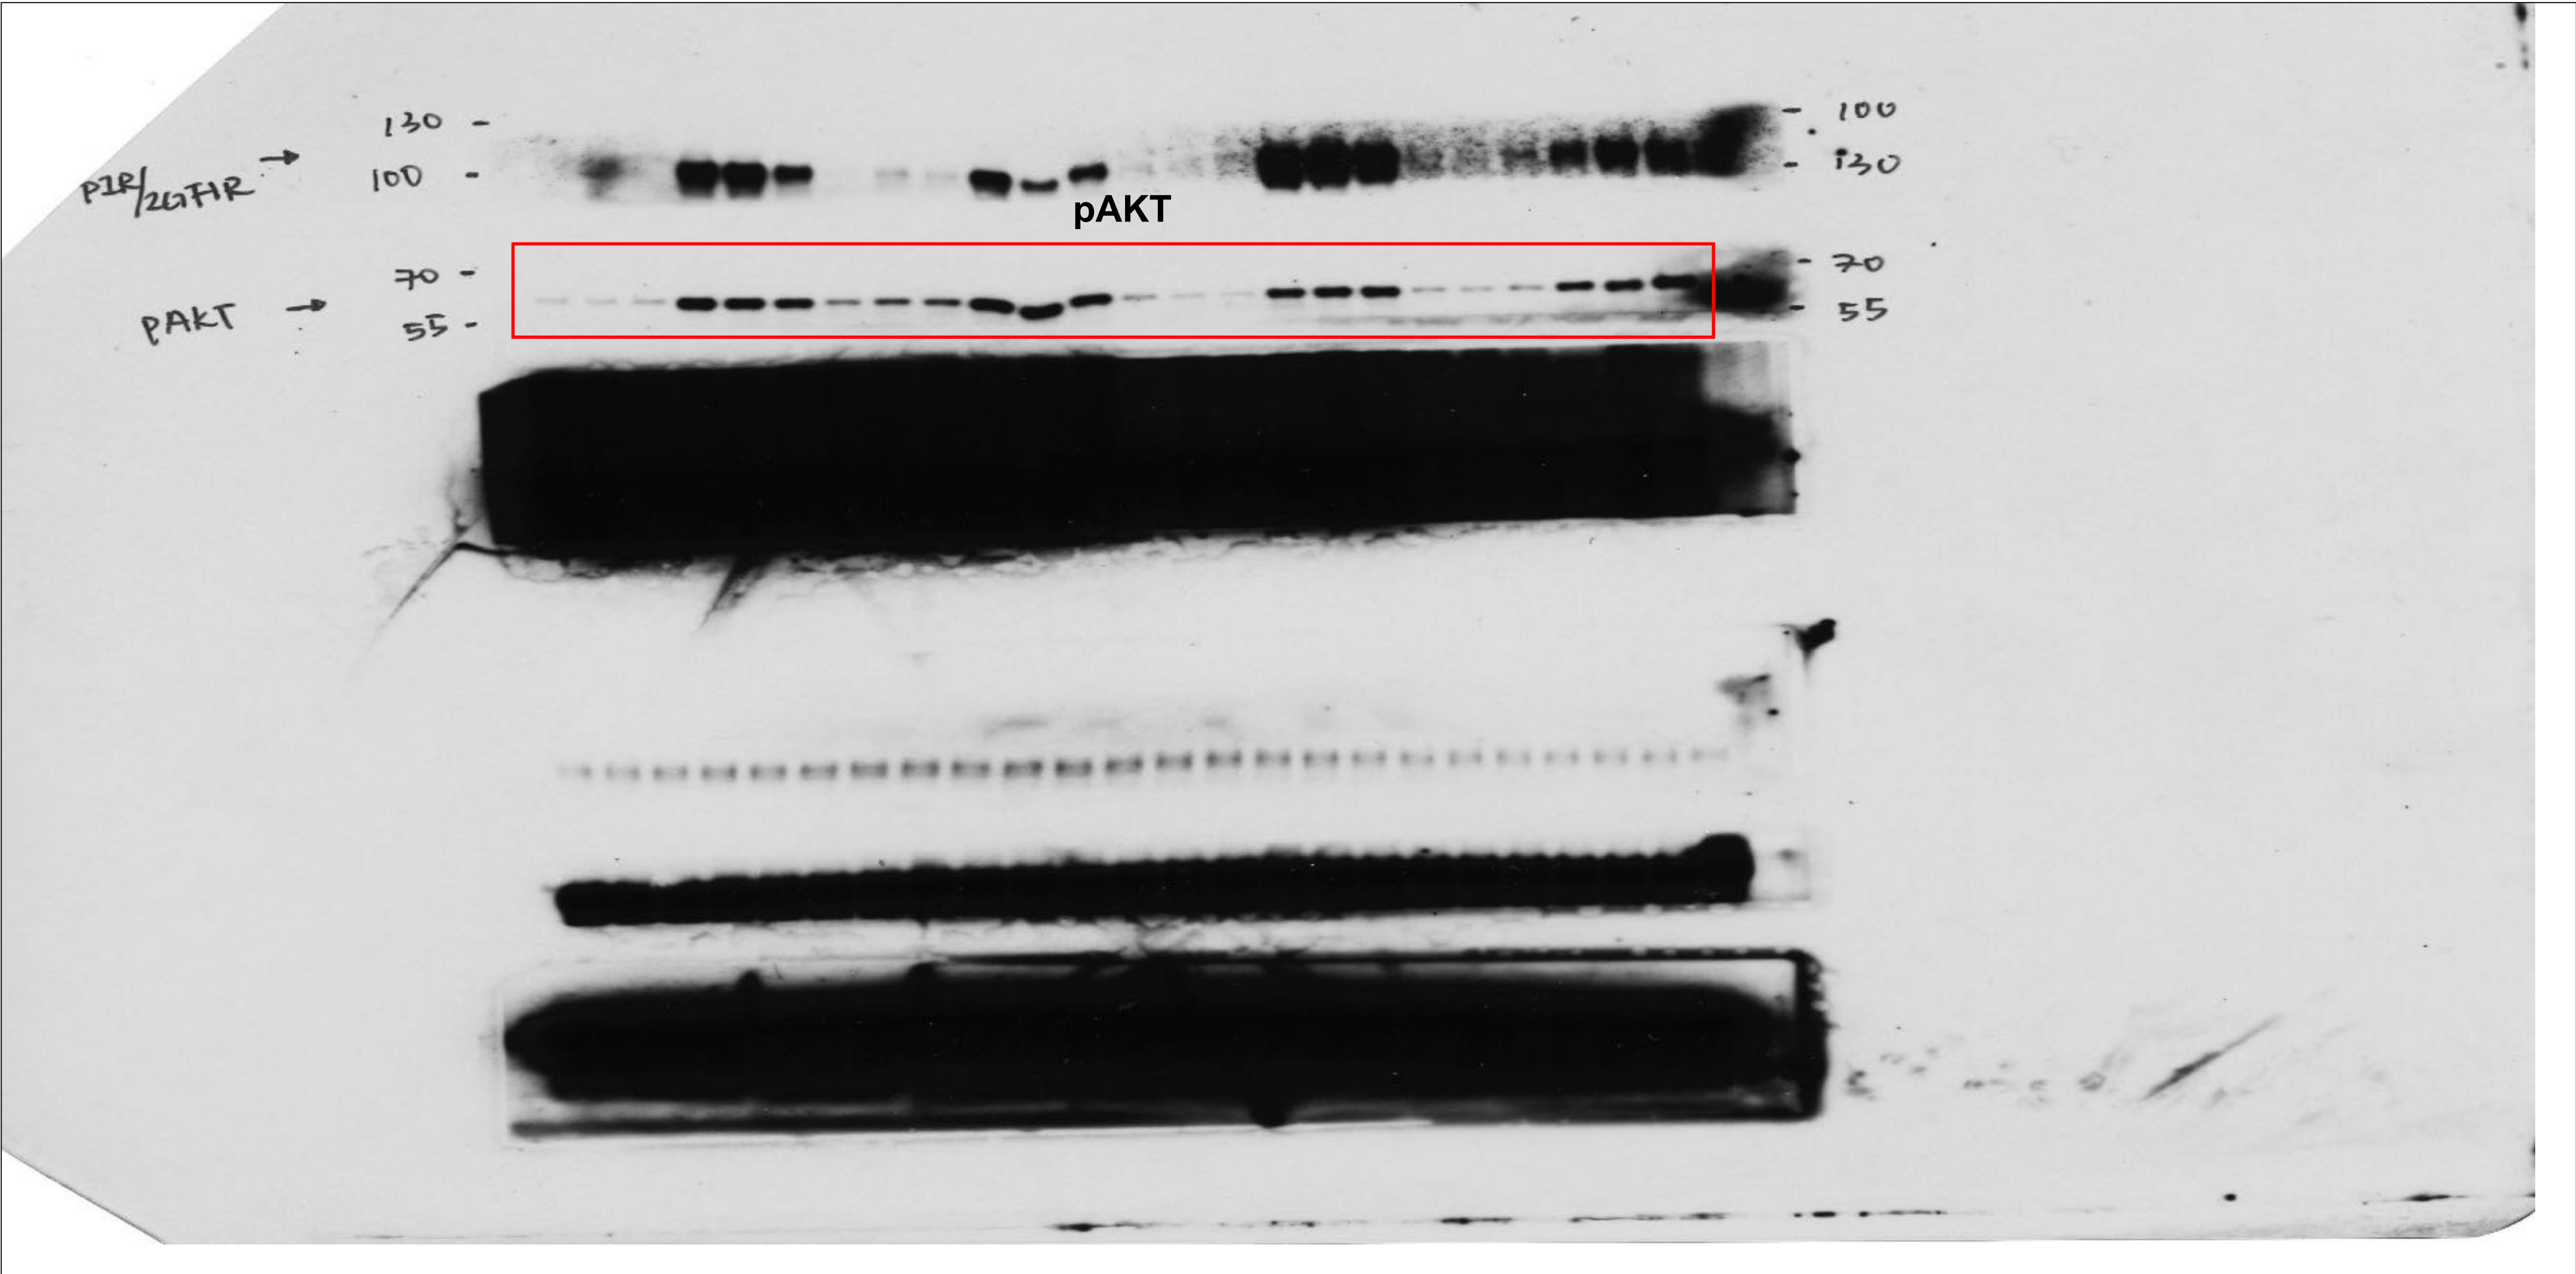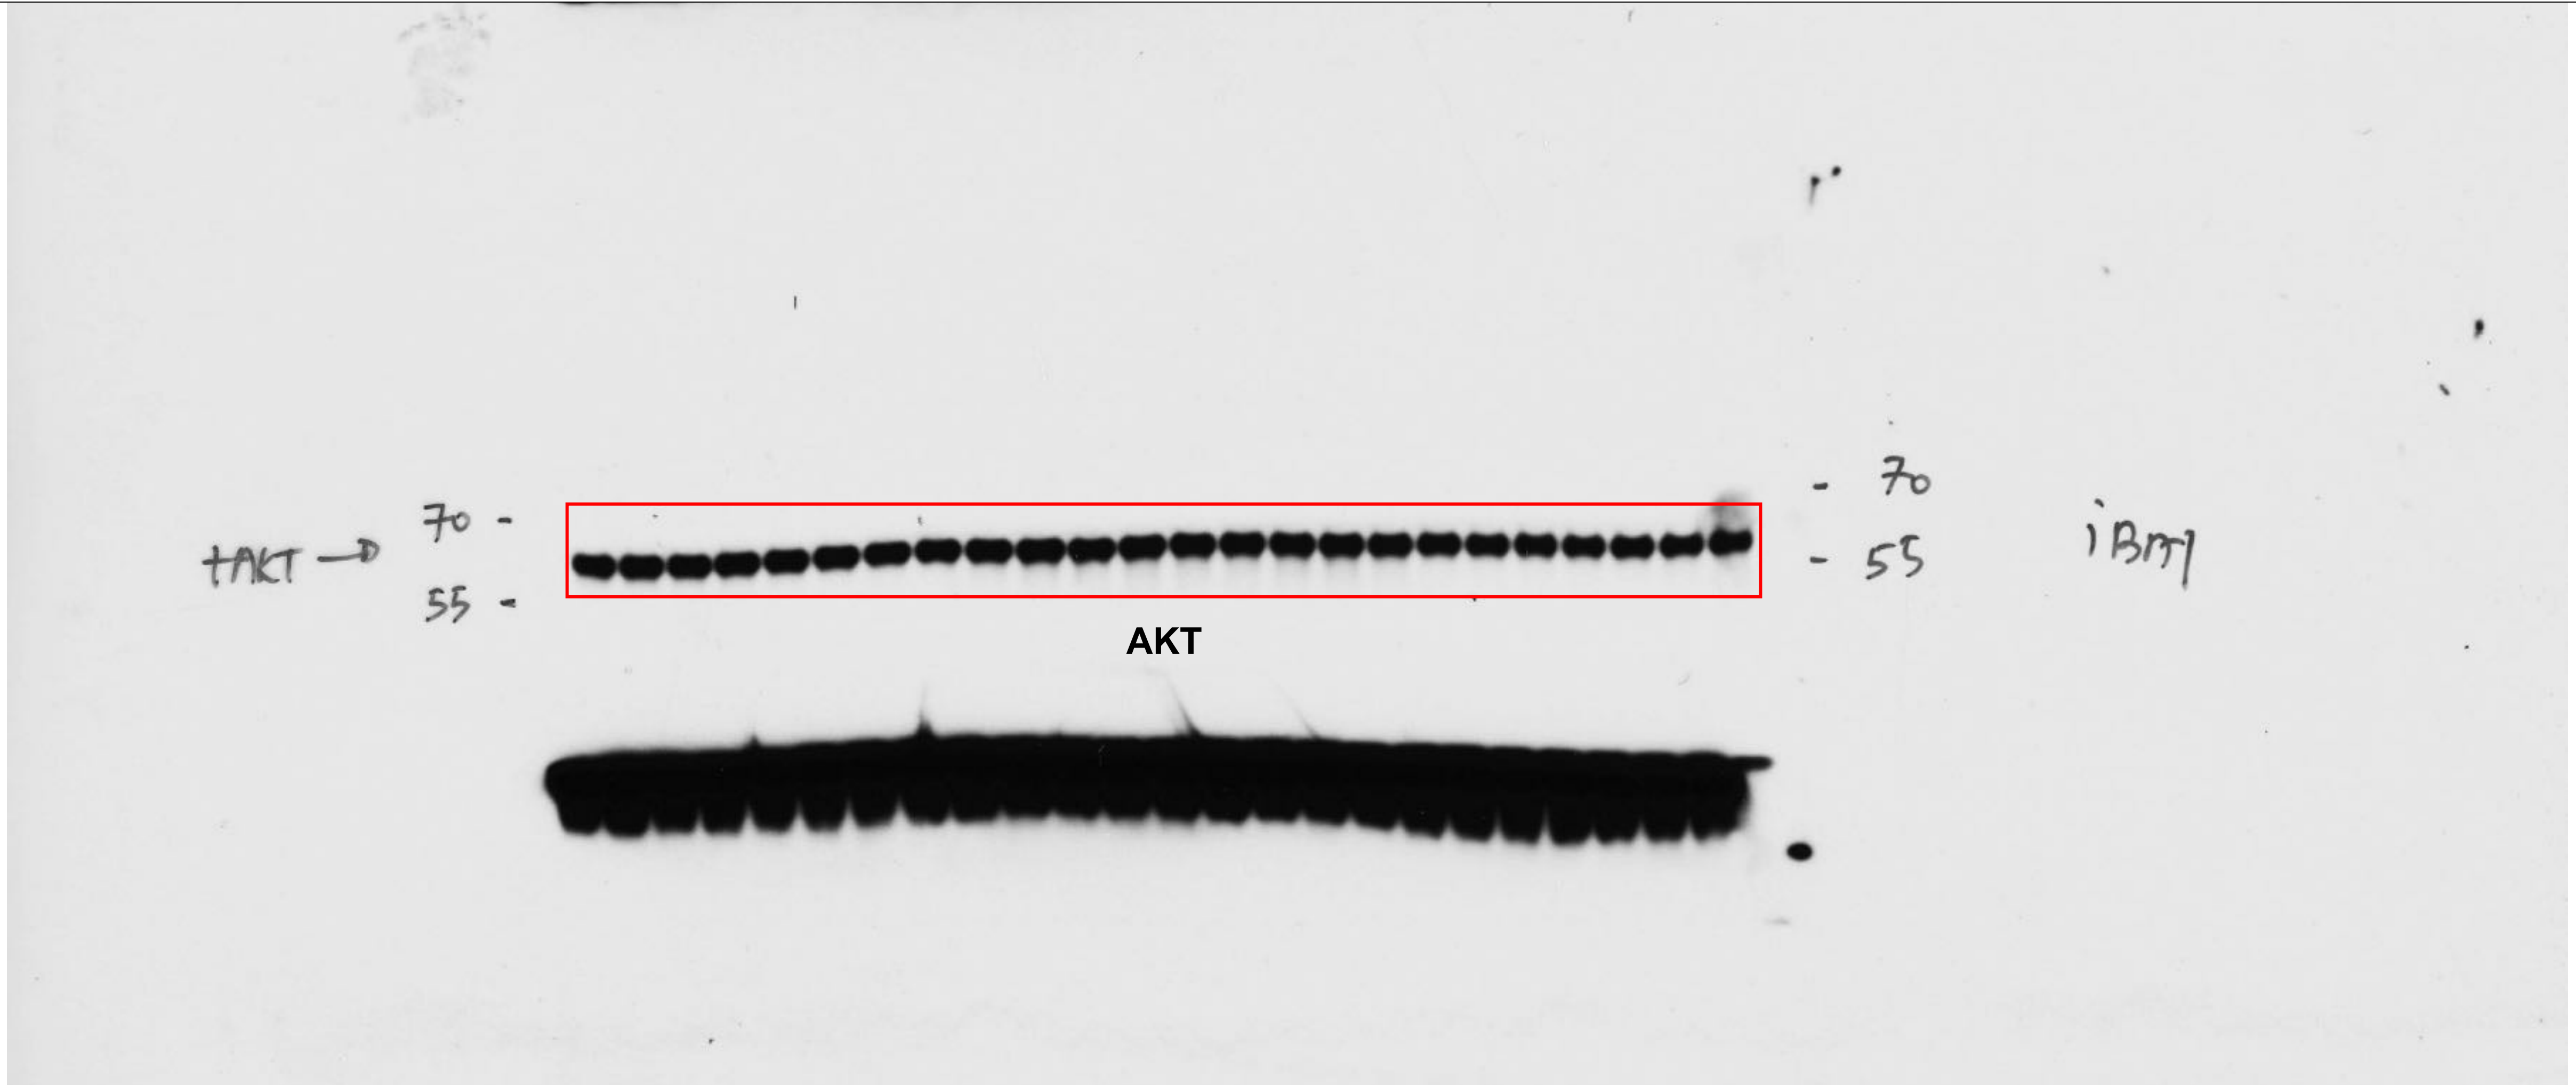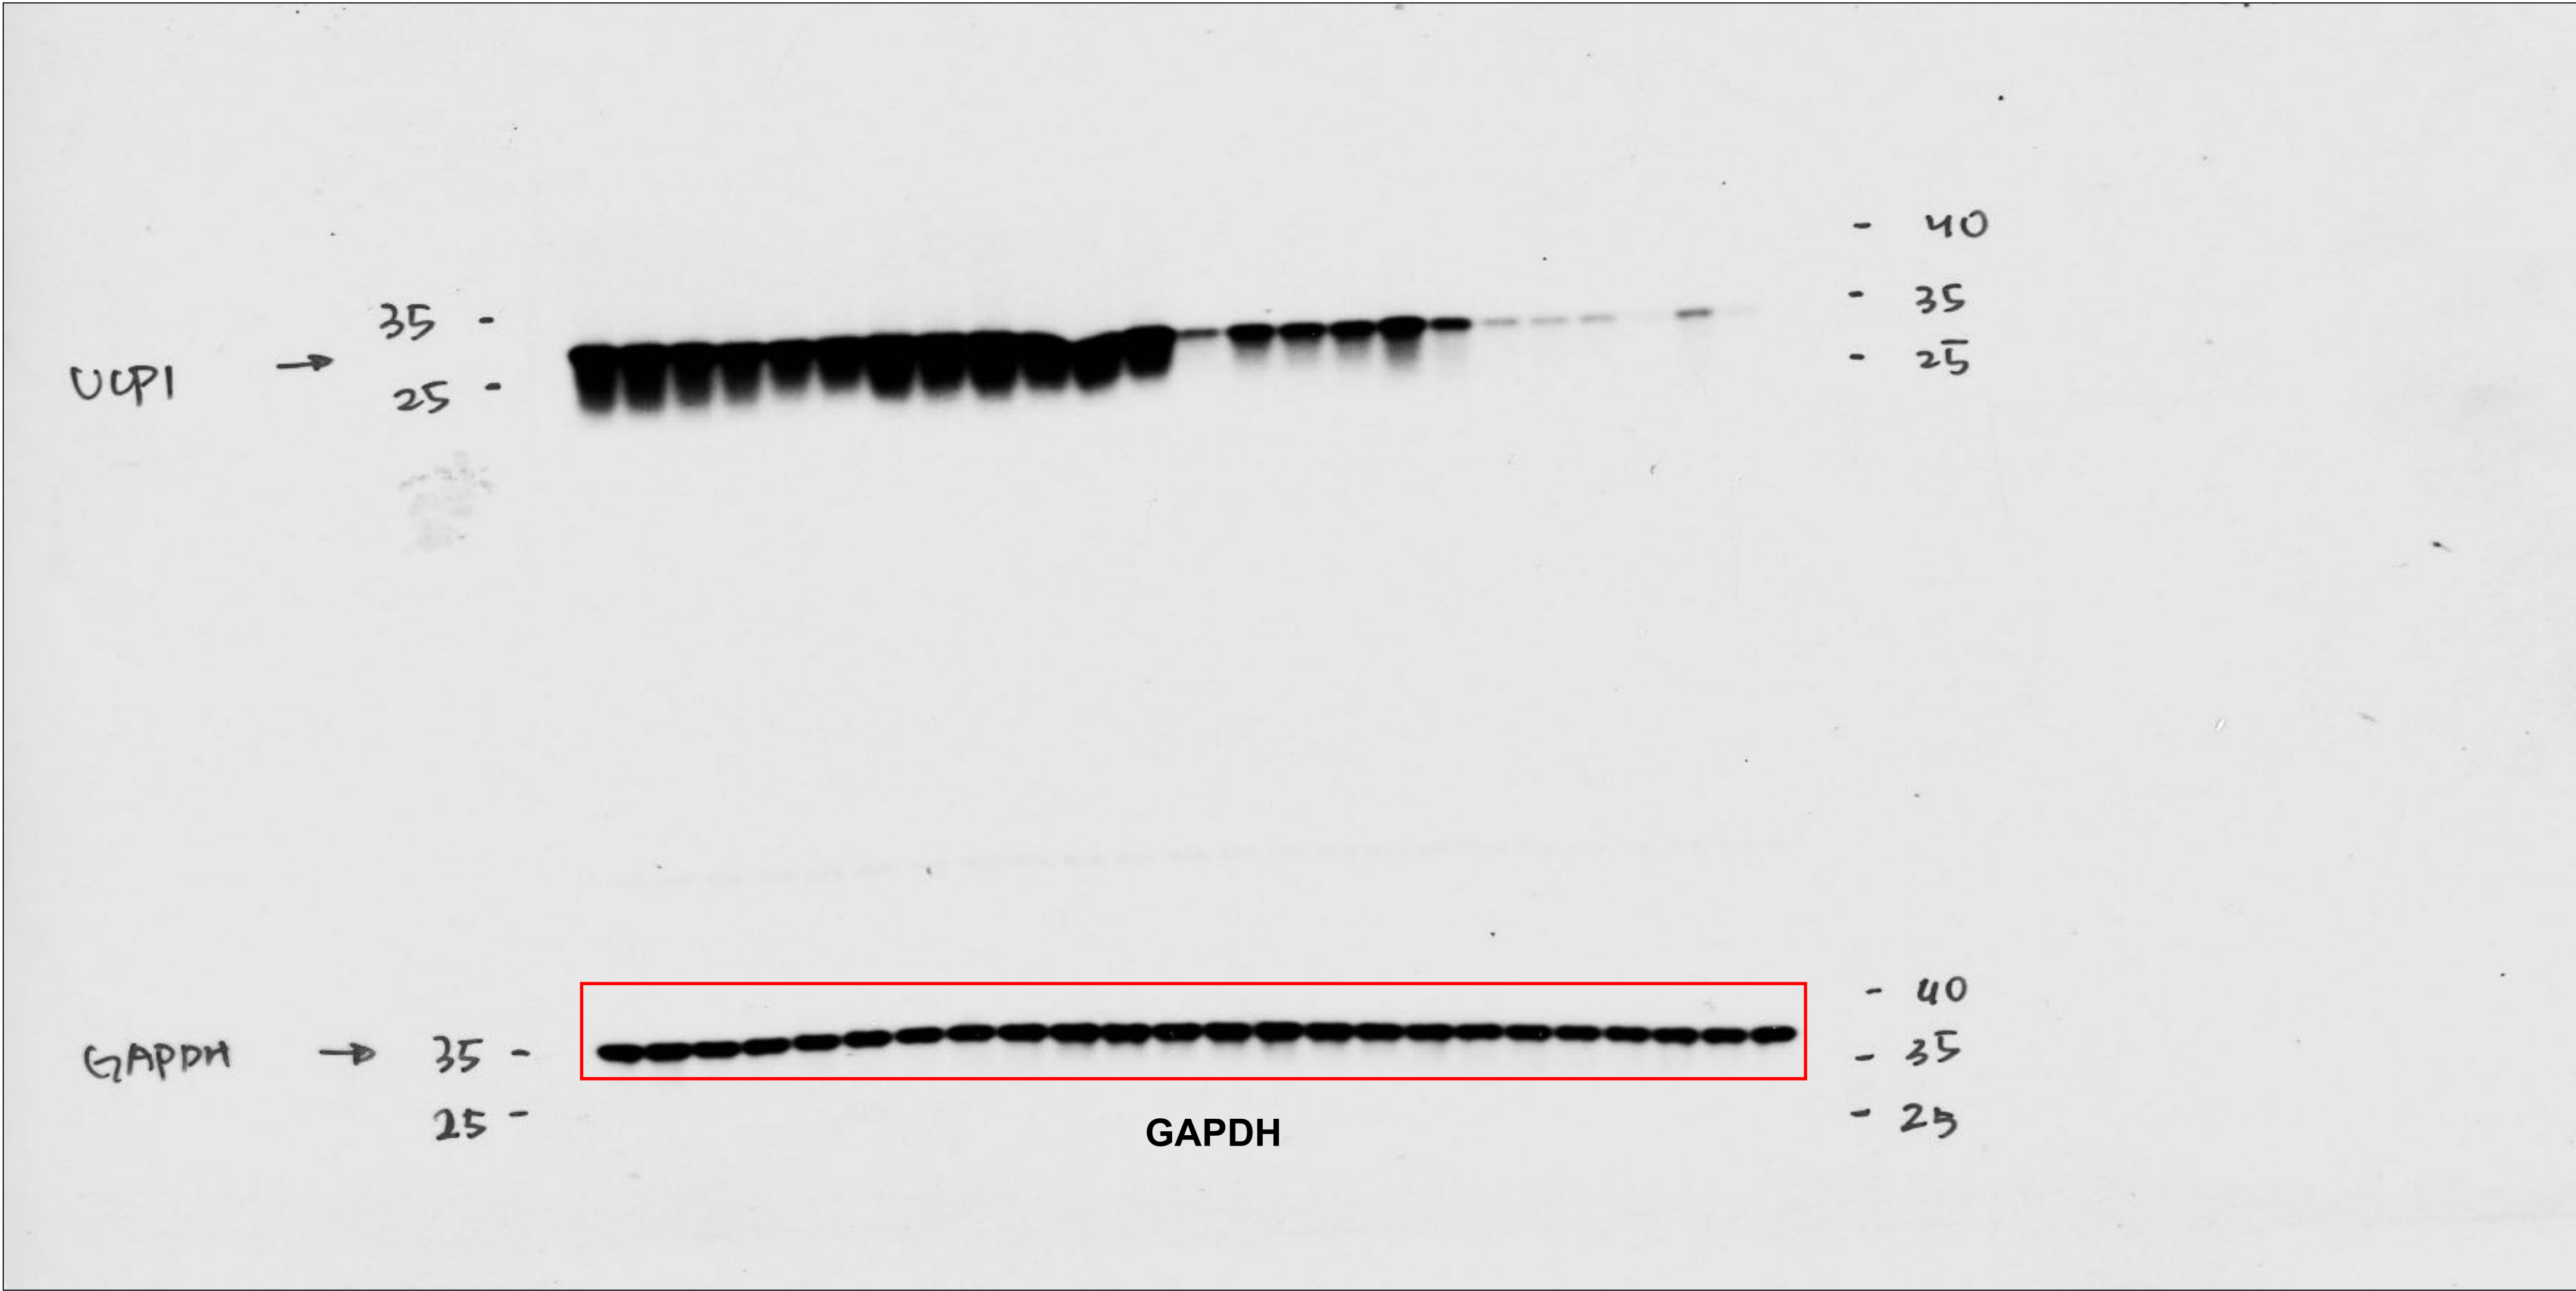

Please note this blot (GAPDH) is identical to blot (GAPDH) presented in Figure 1o as the same membrane was used for probing with a different antibody.



Figure 3e

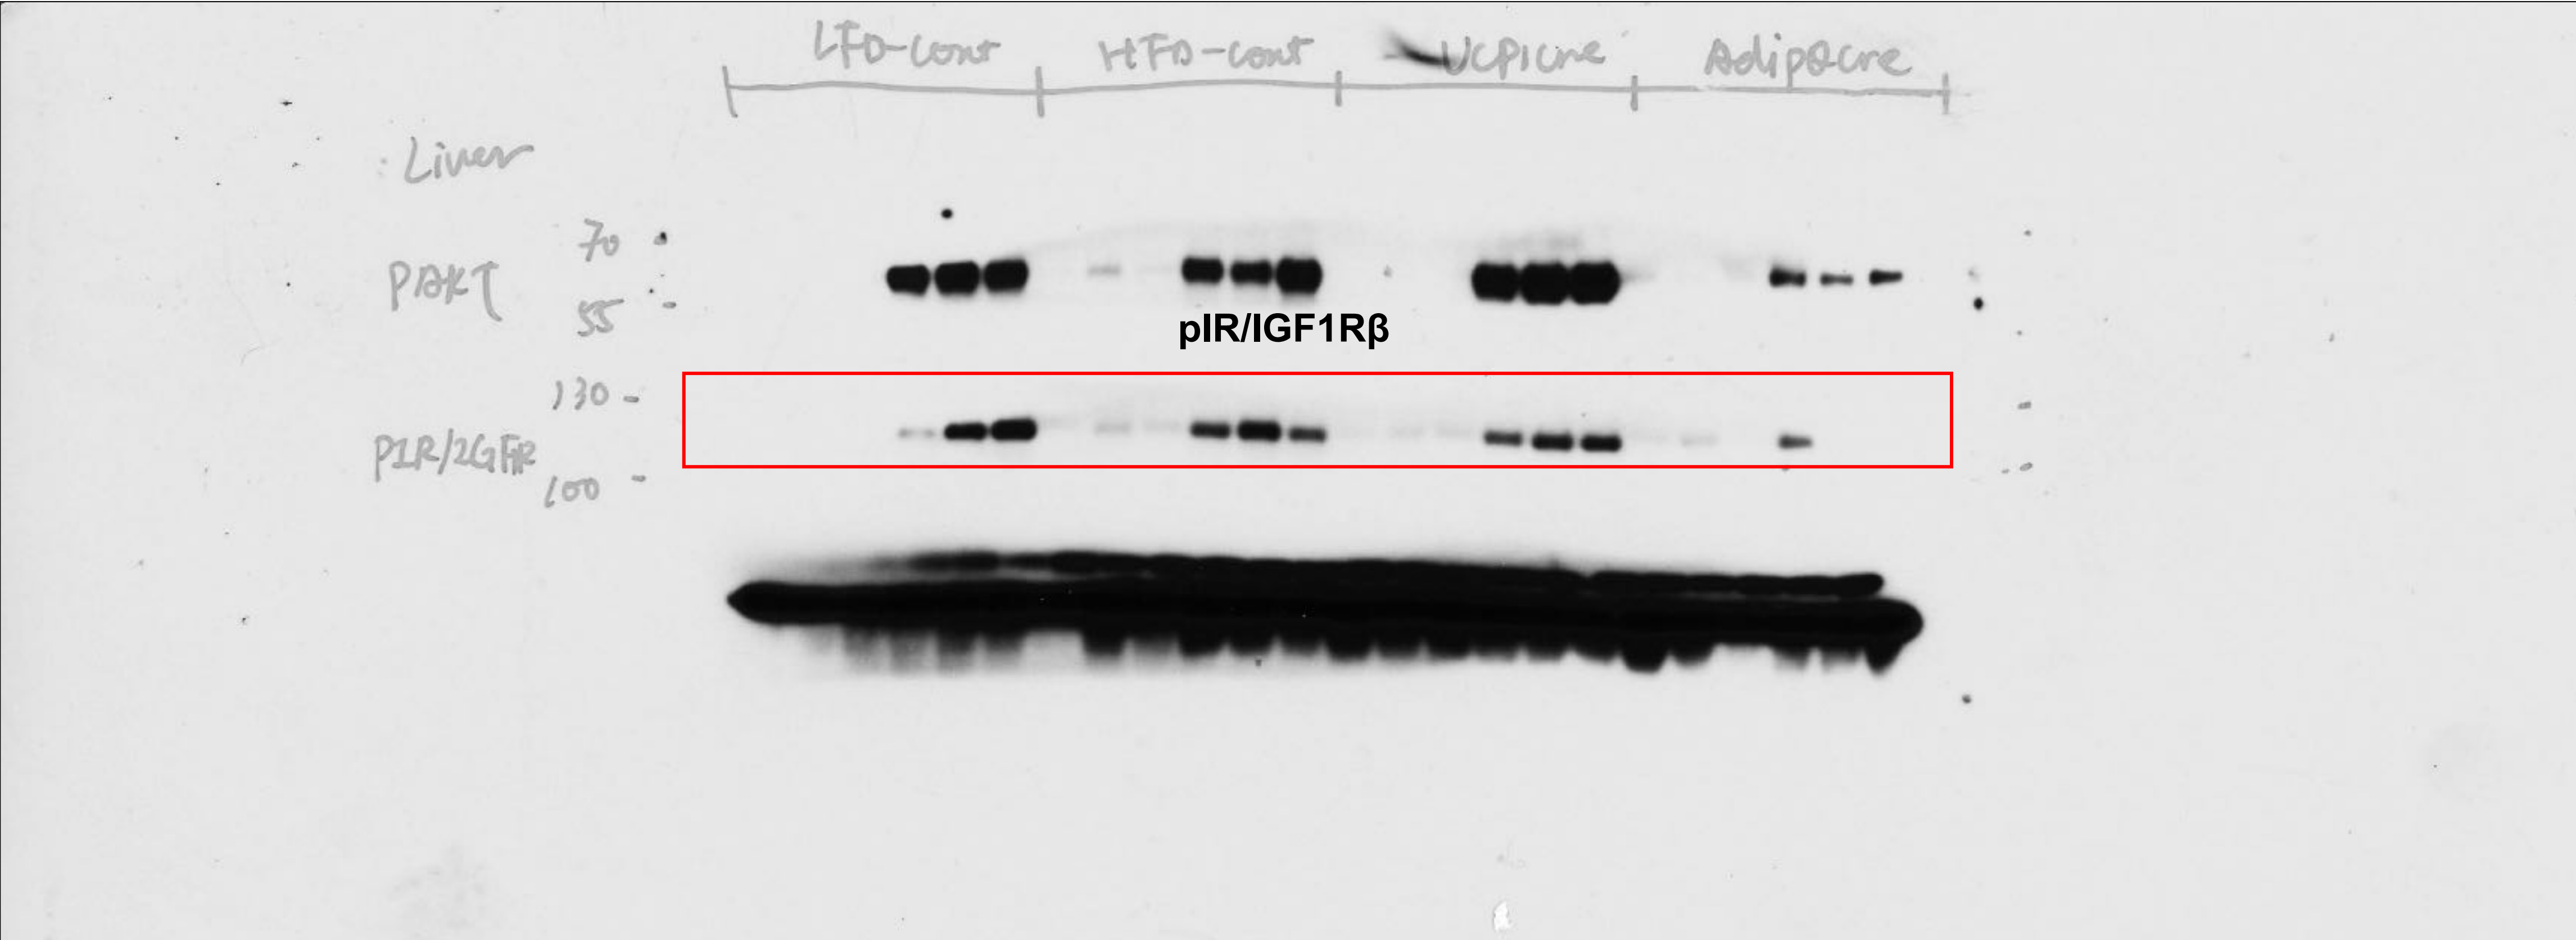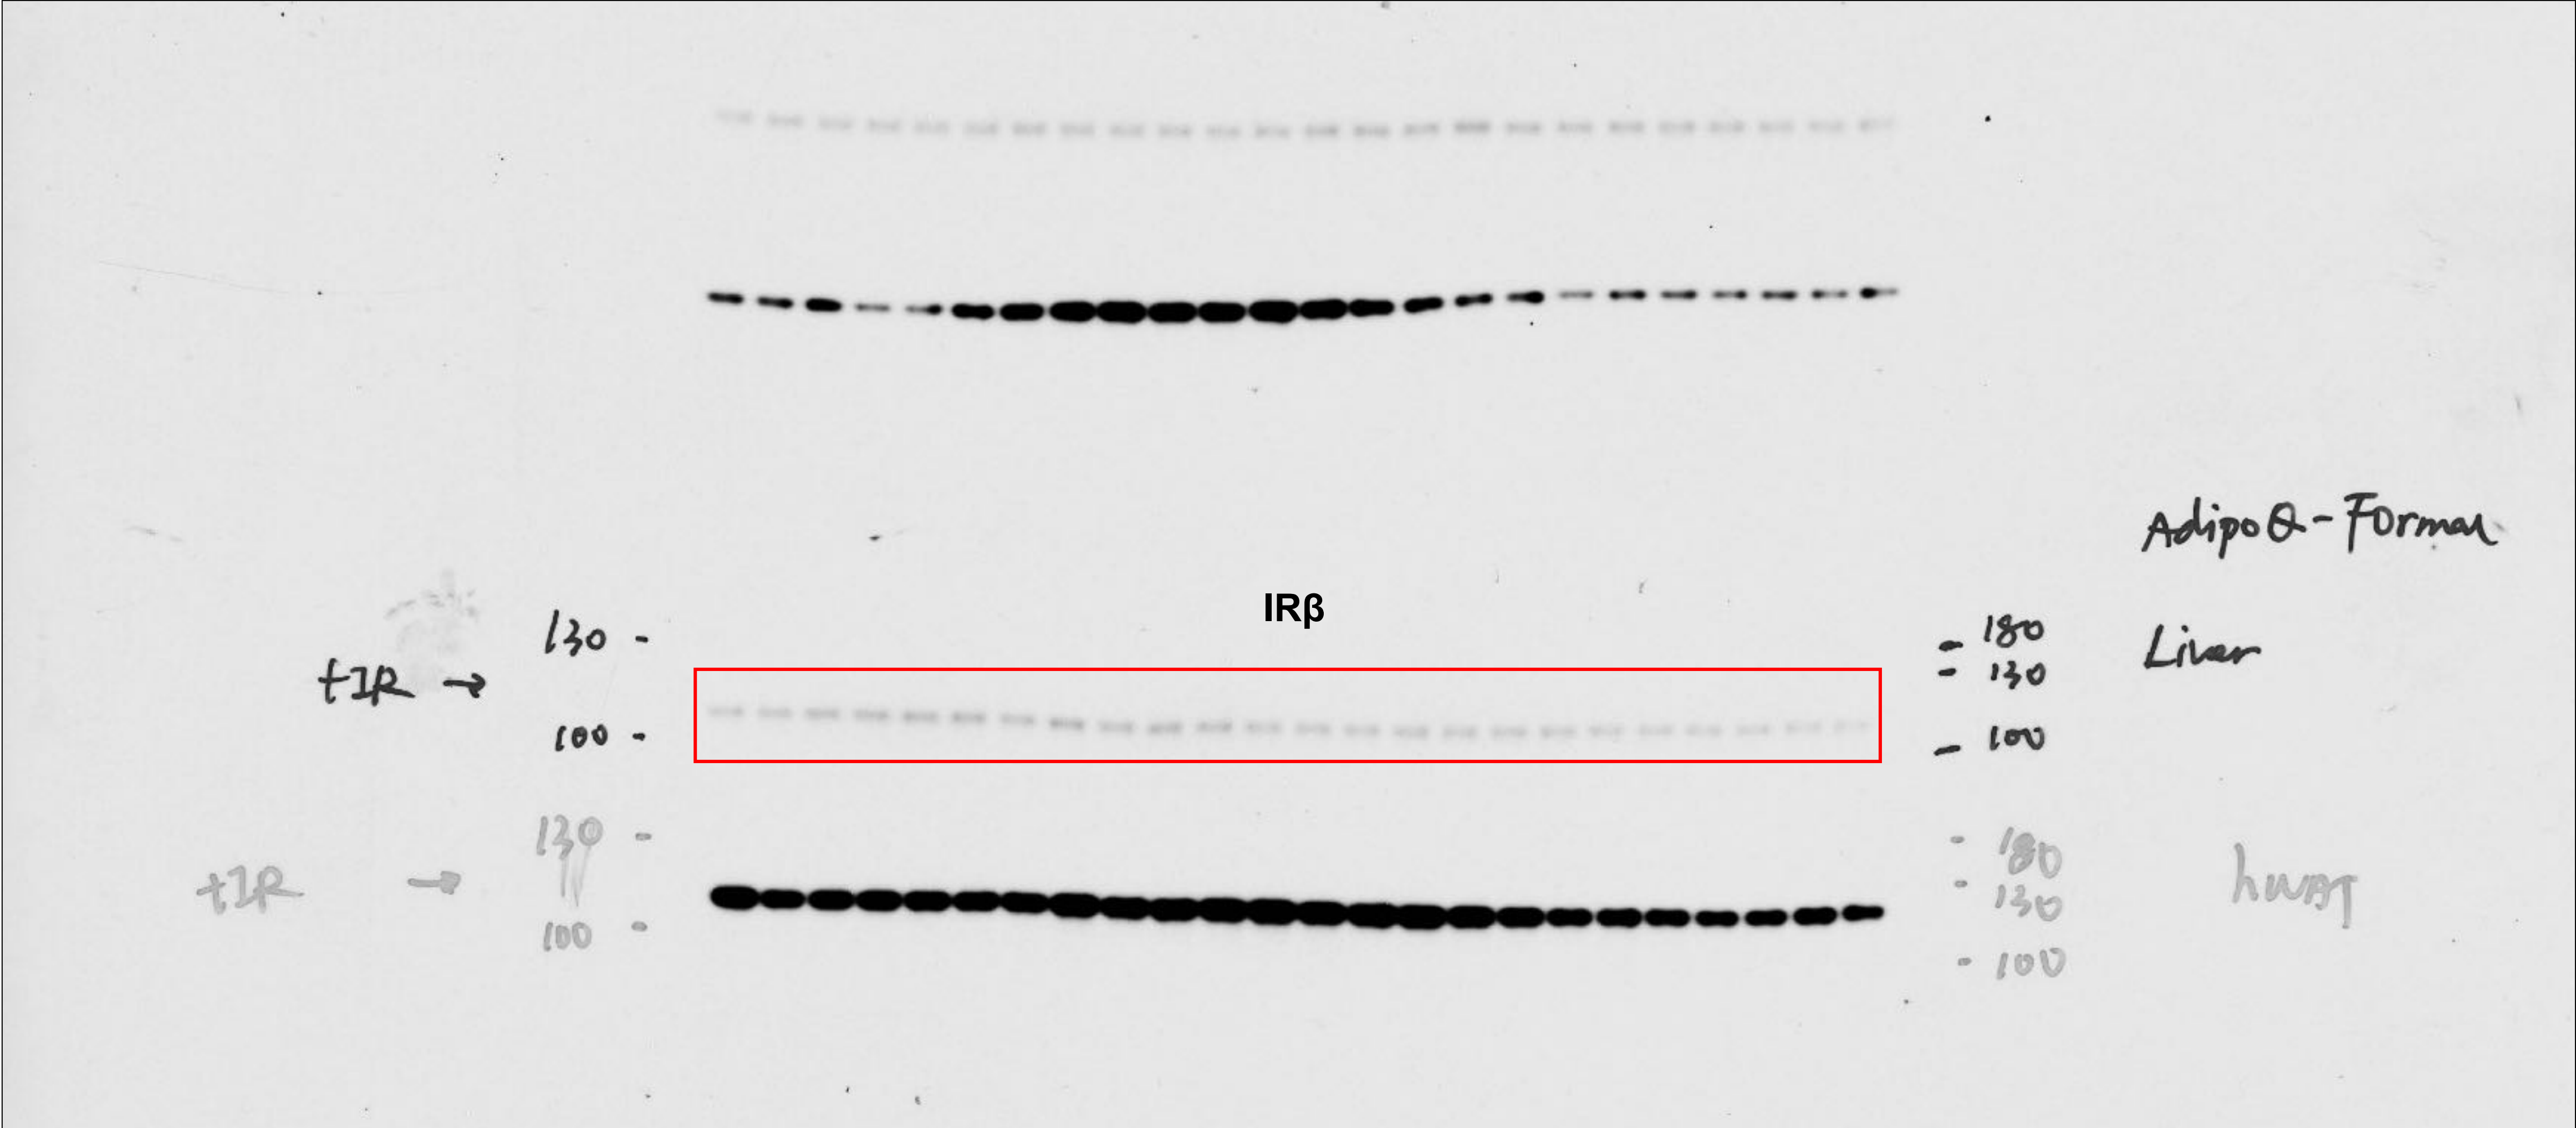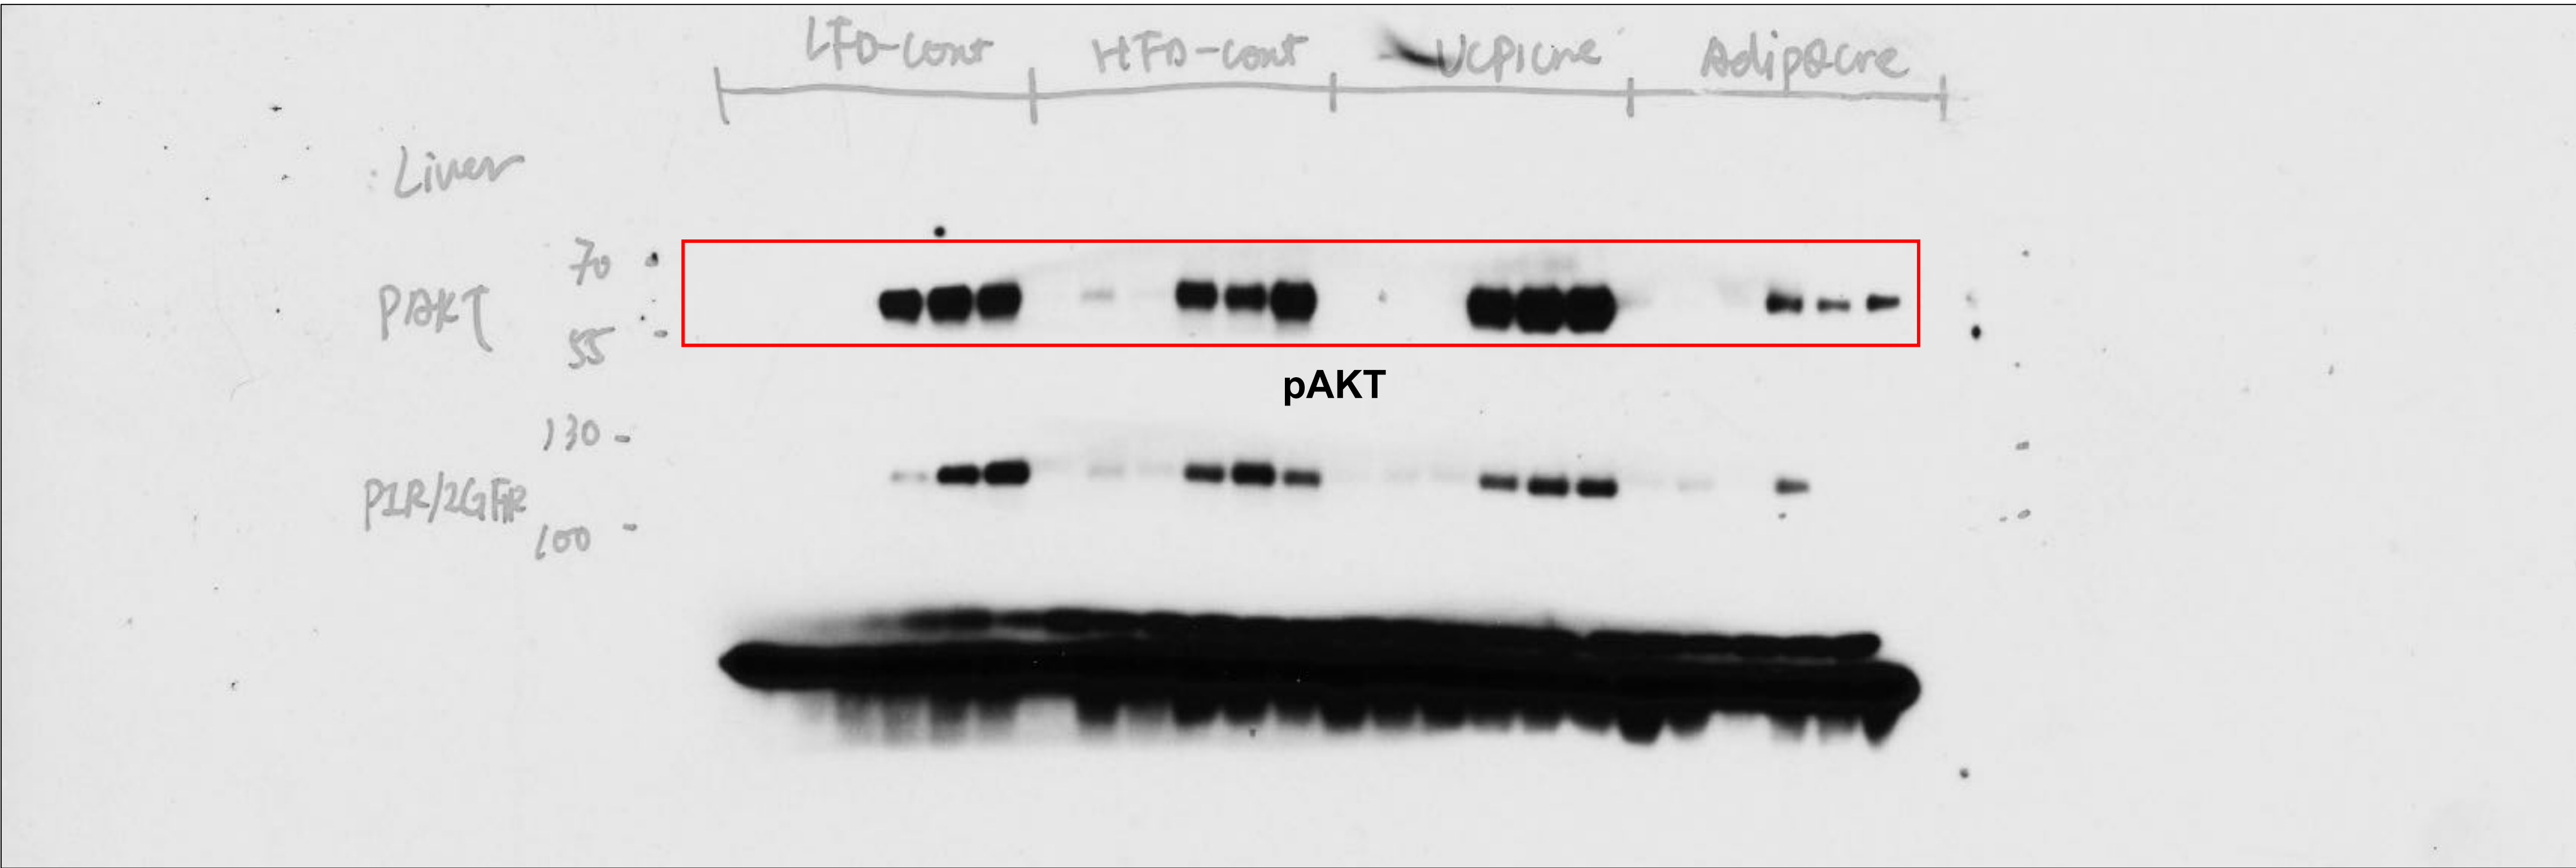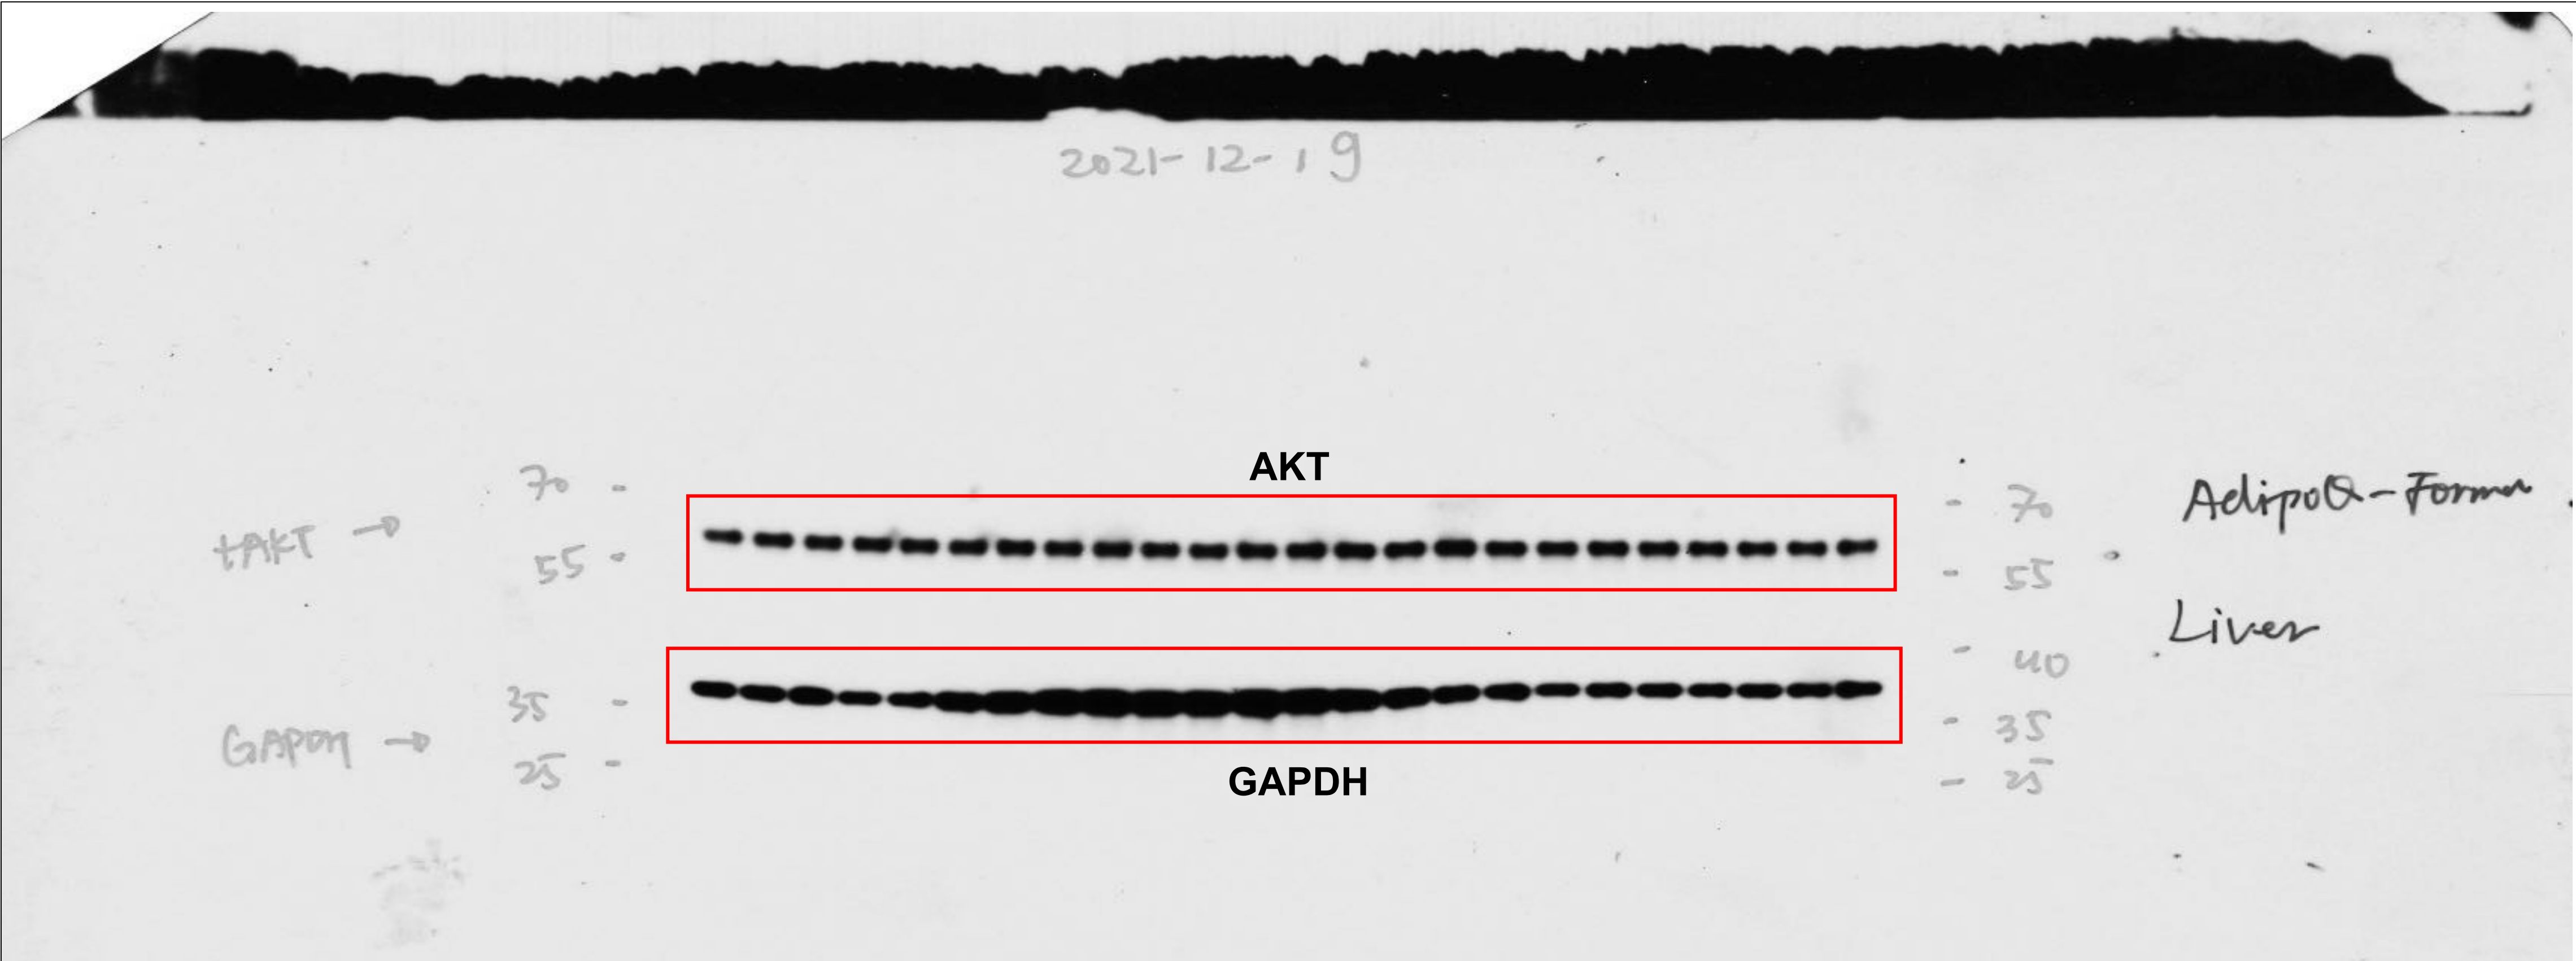



### Figure 3f

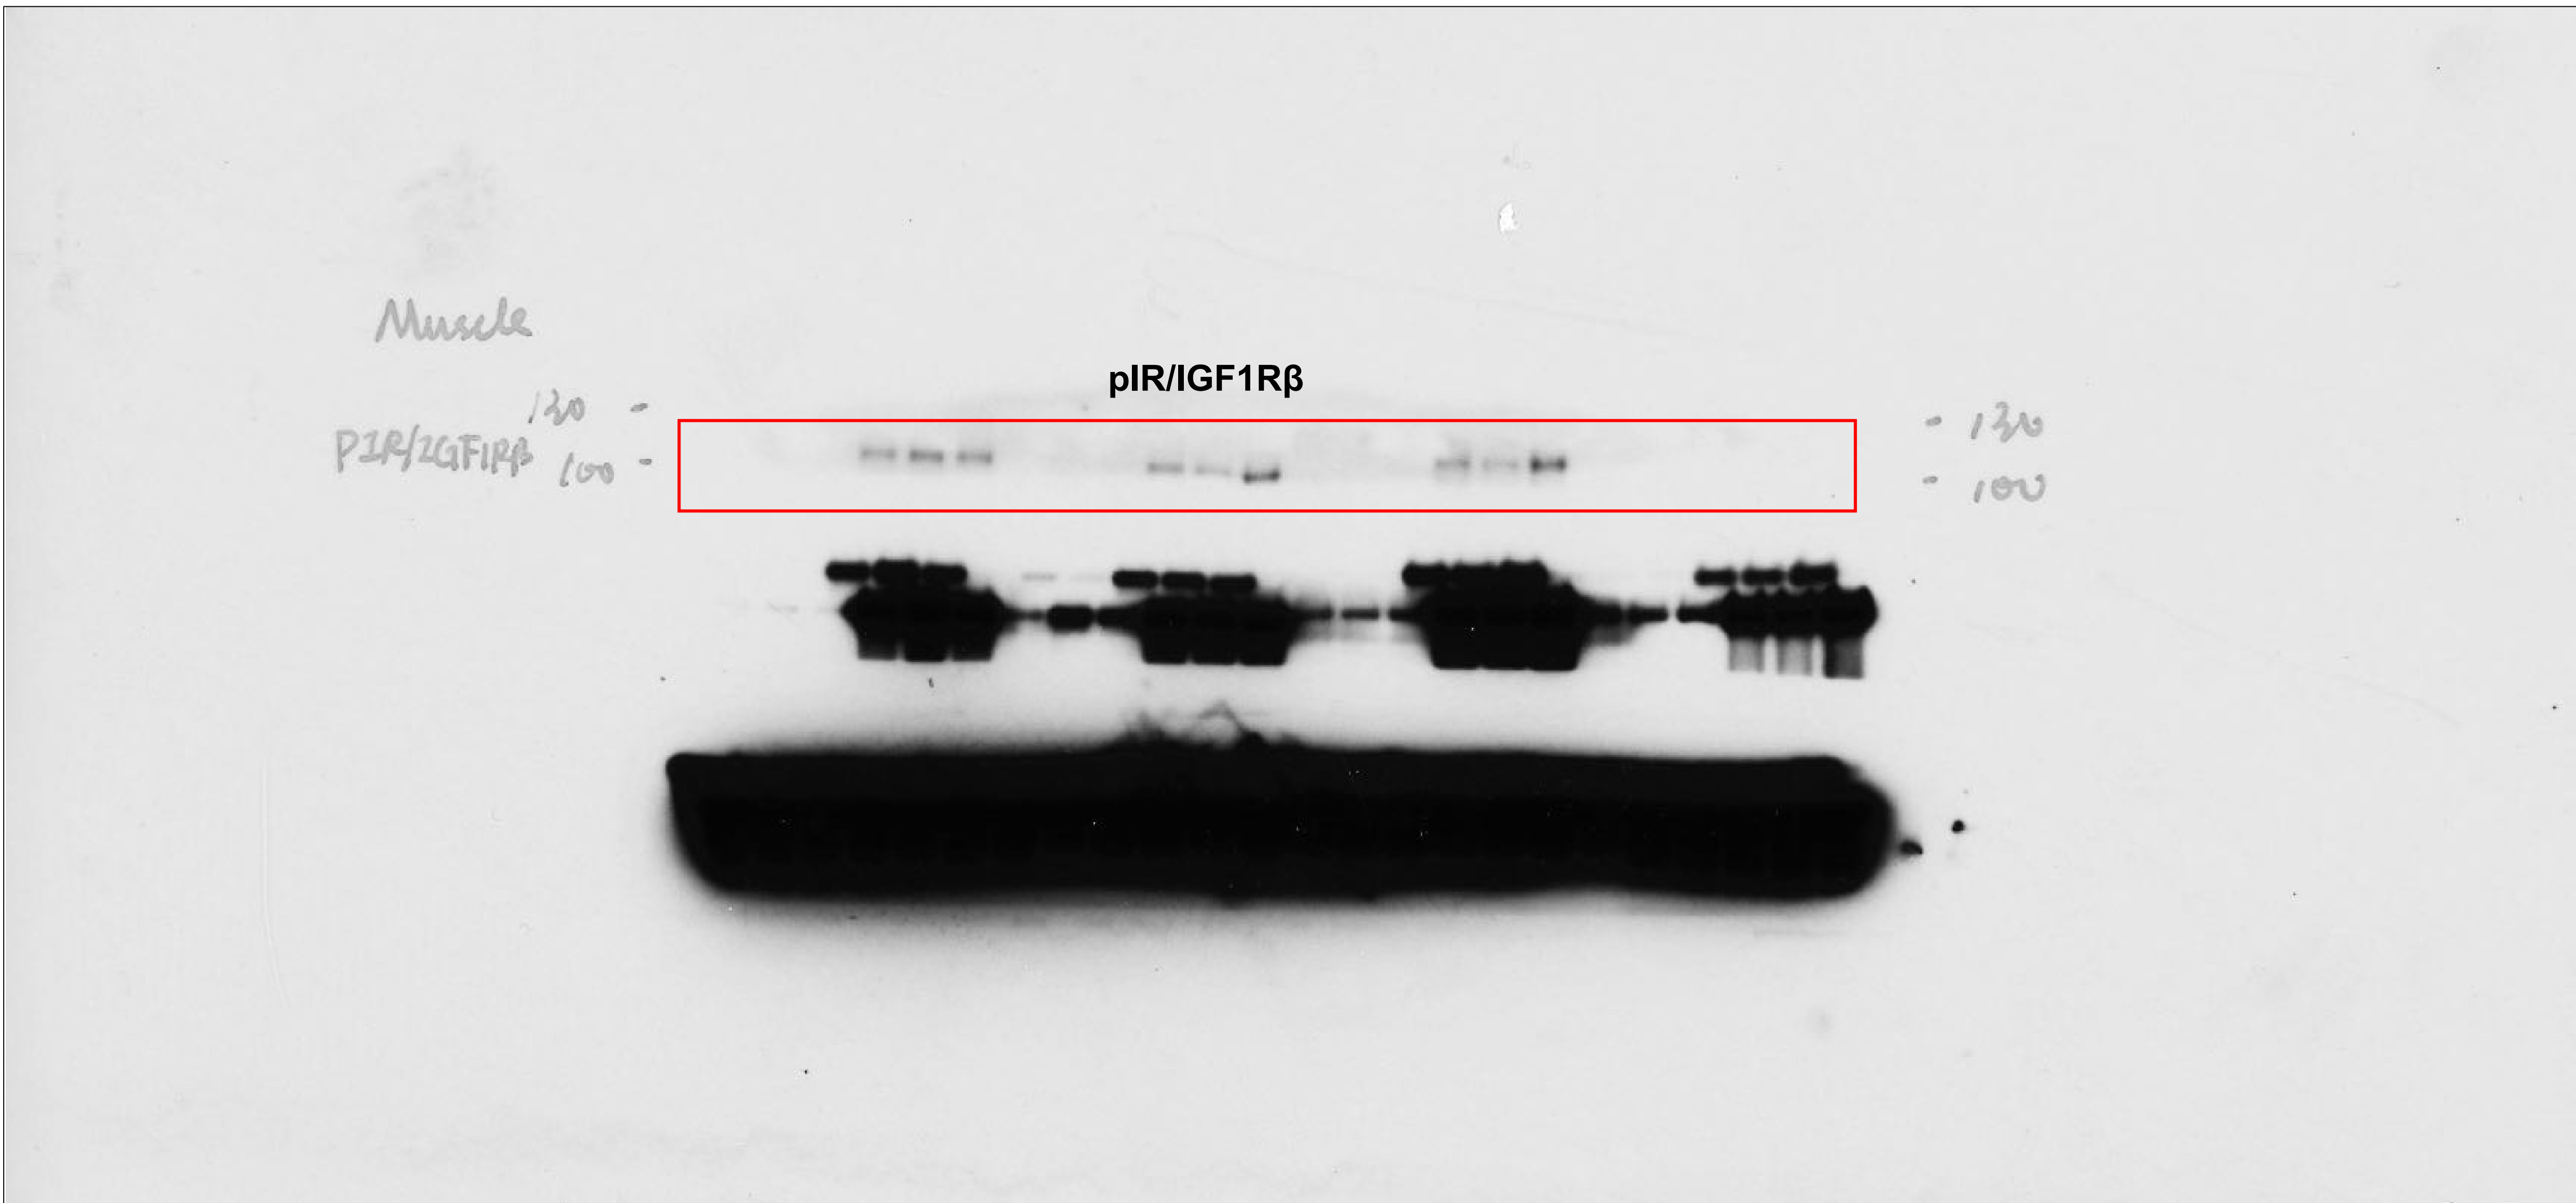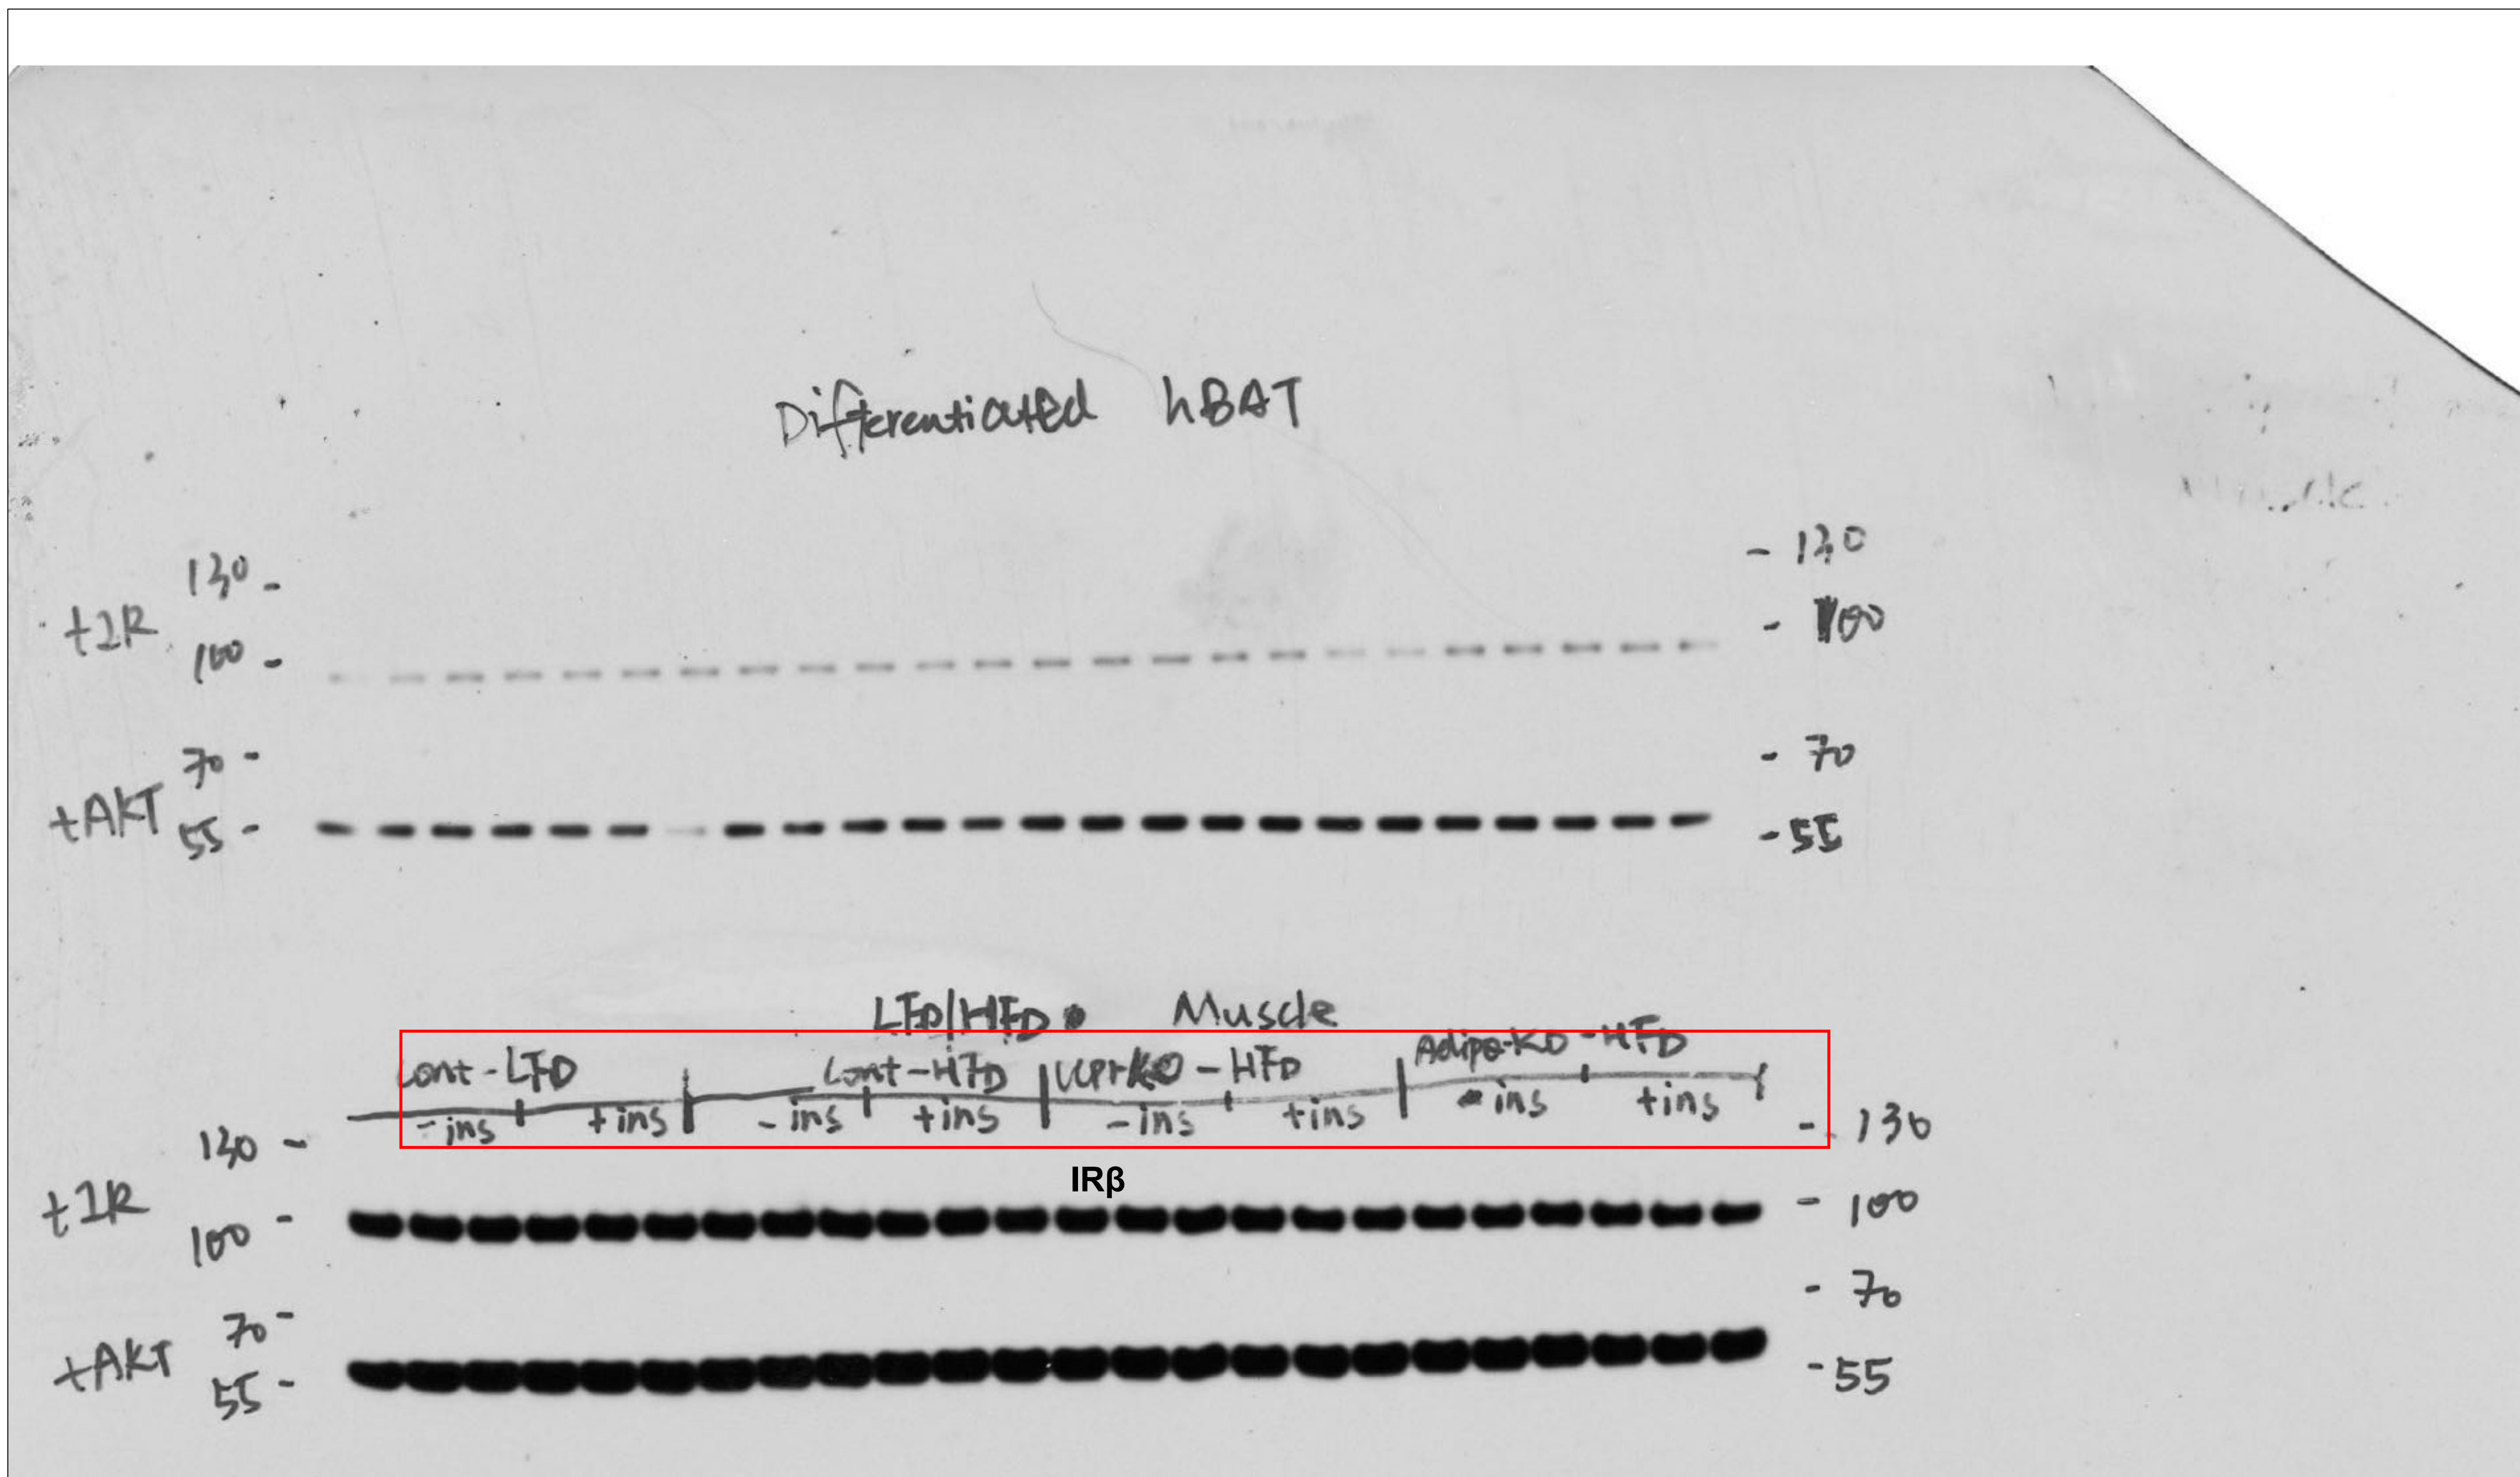



Figure 3f

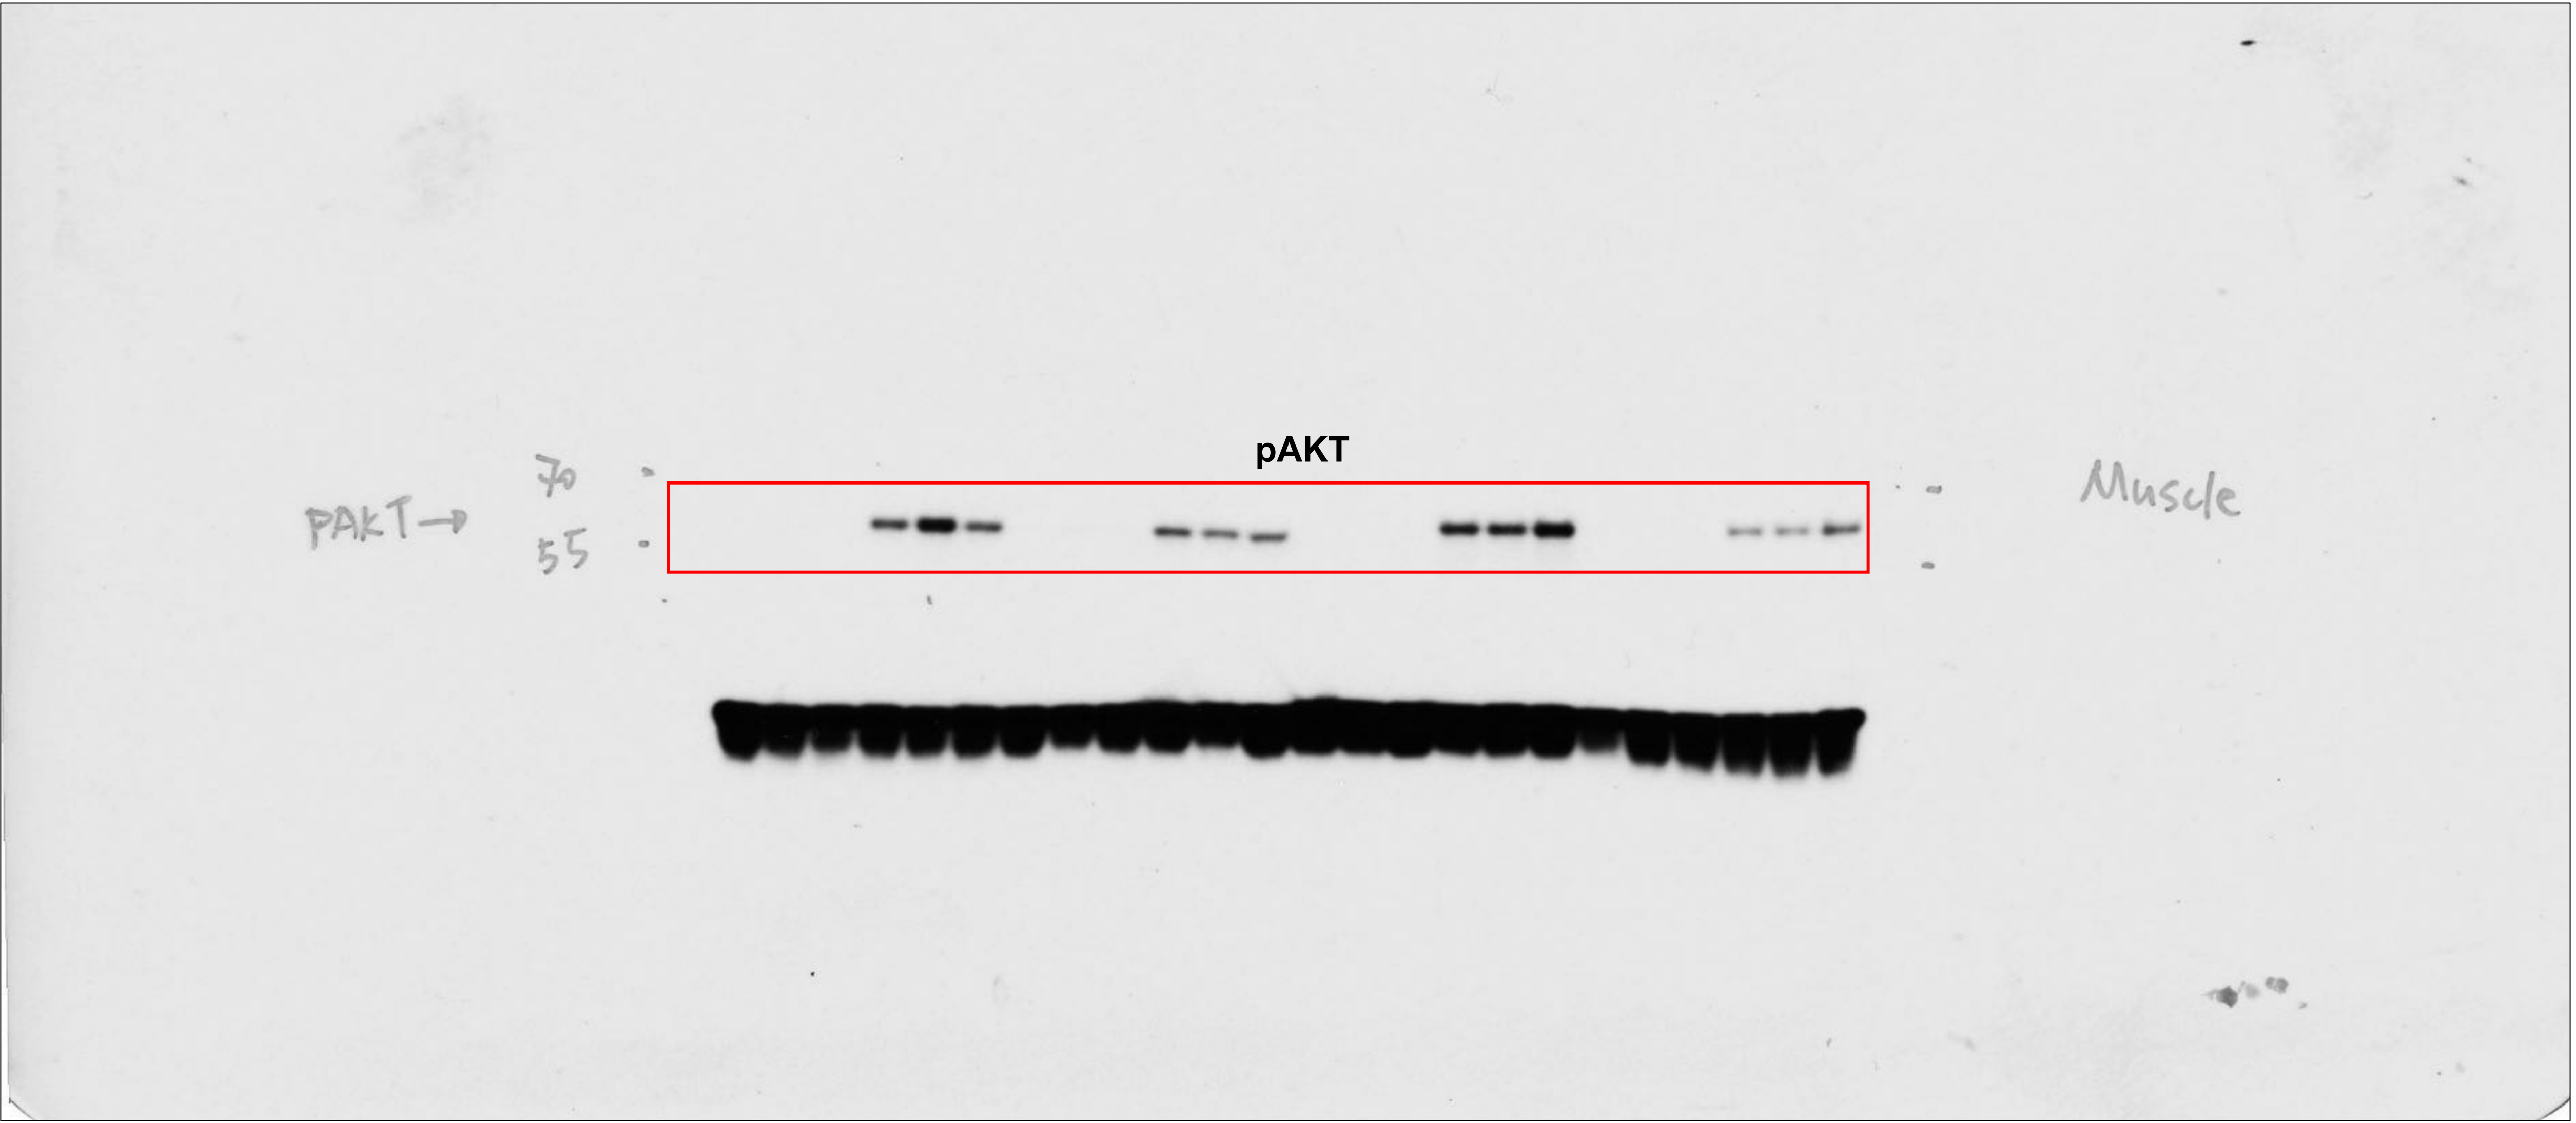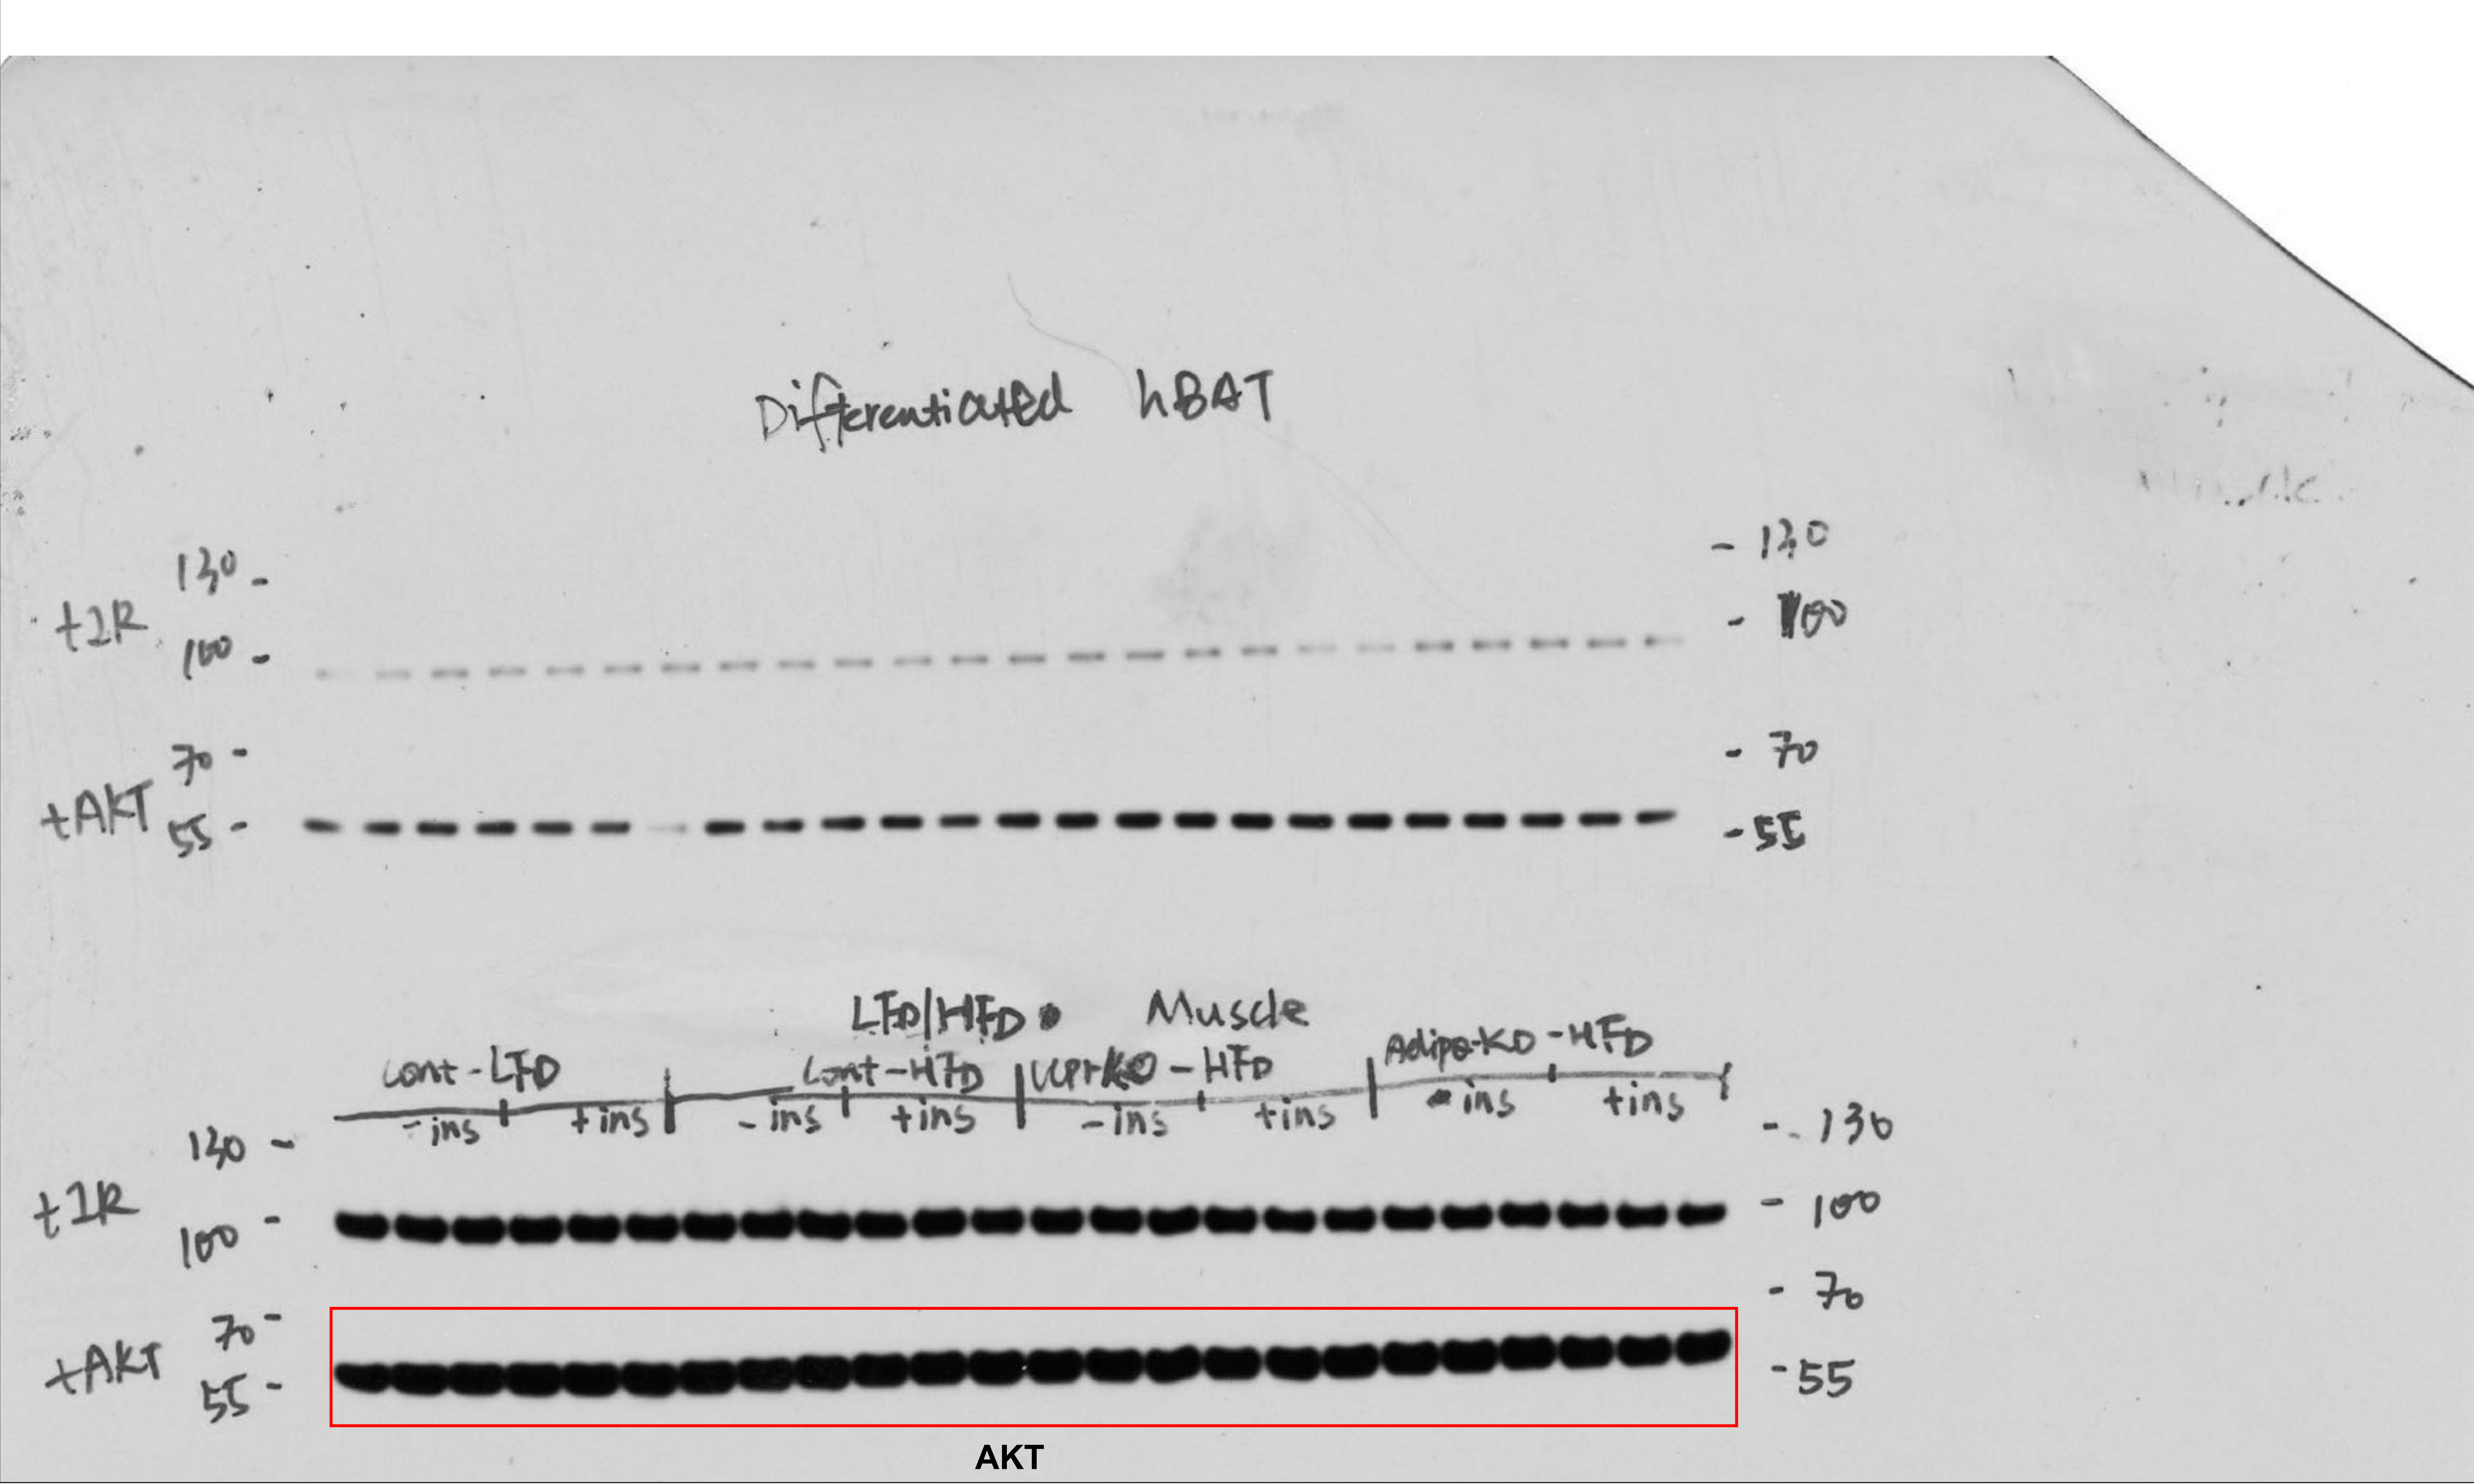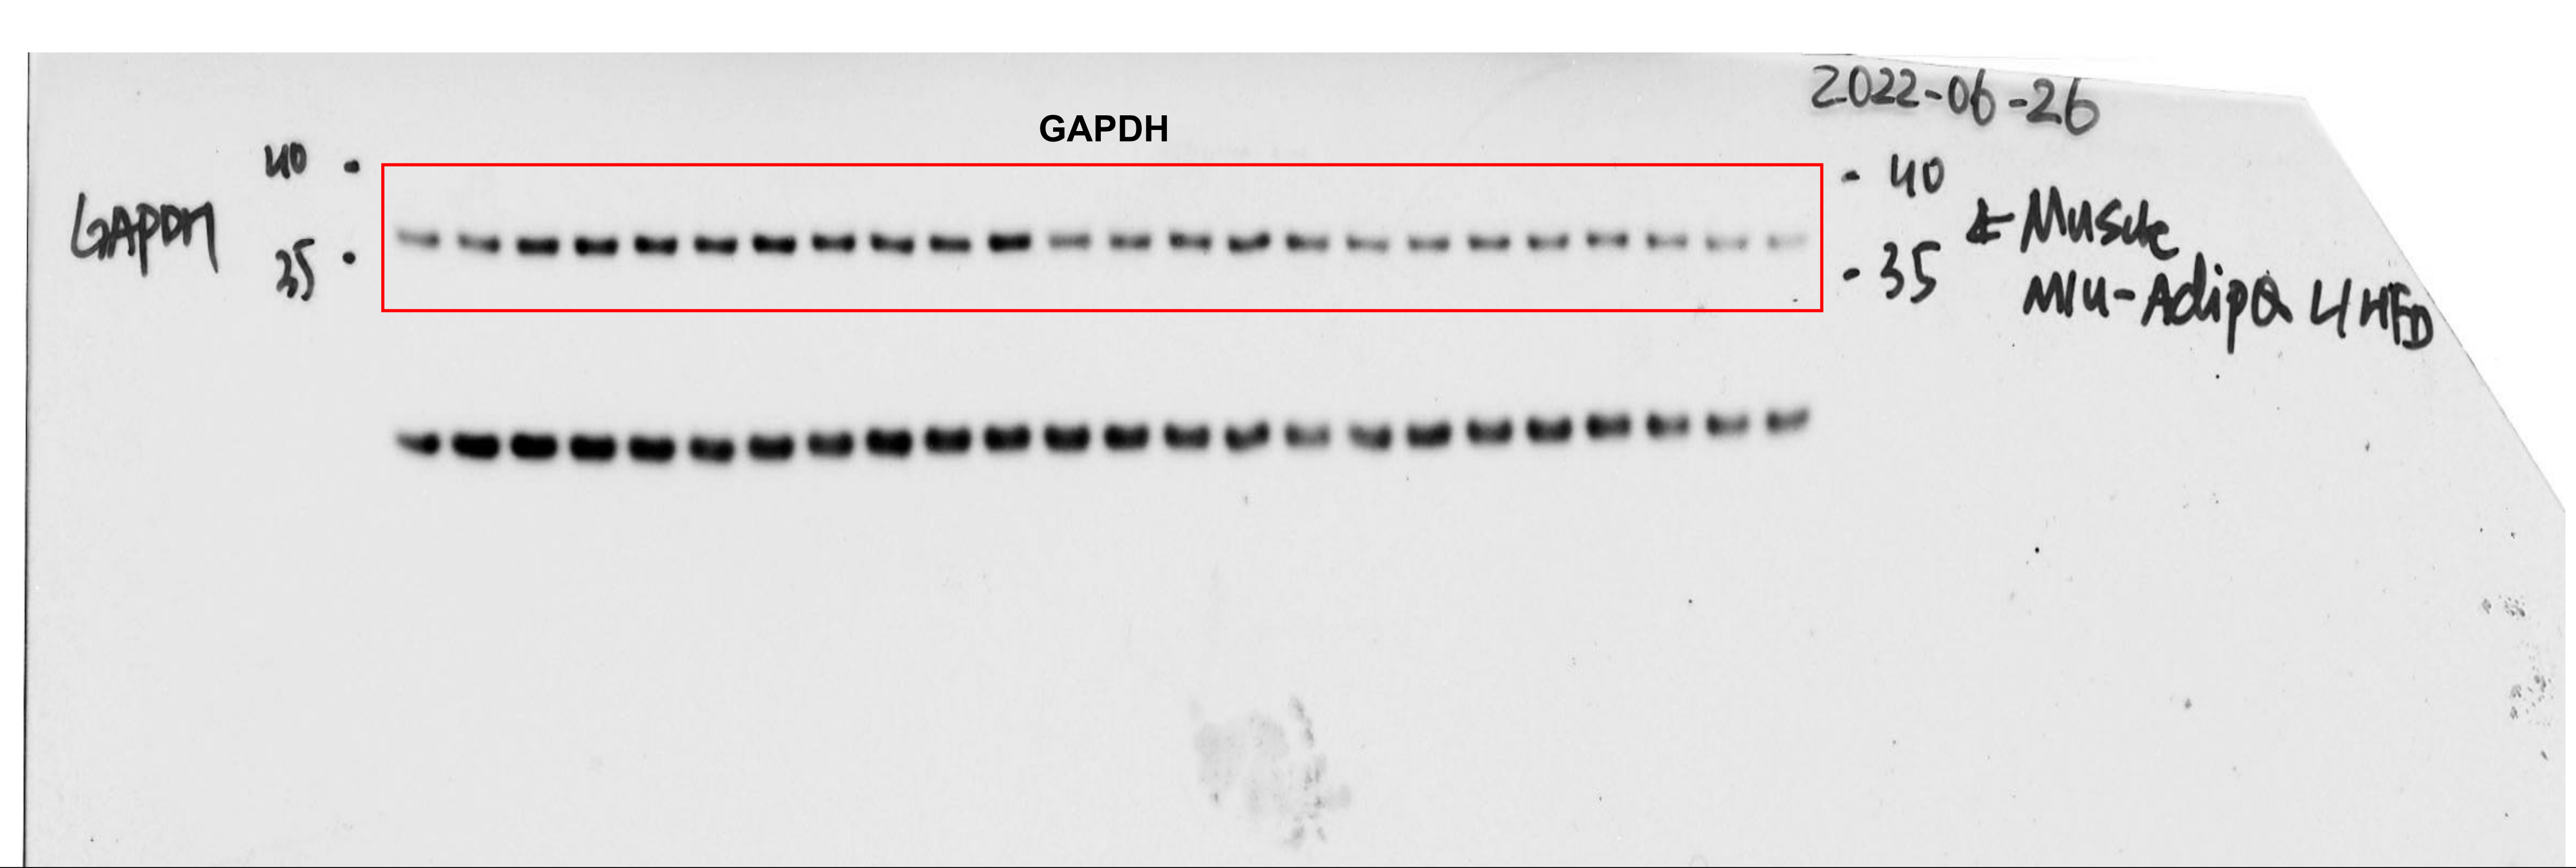



Figure 3g

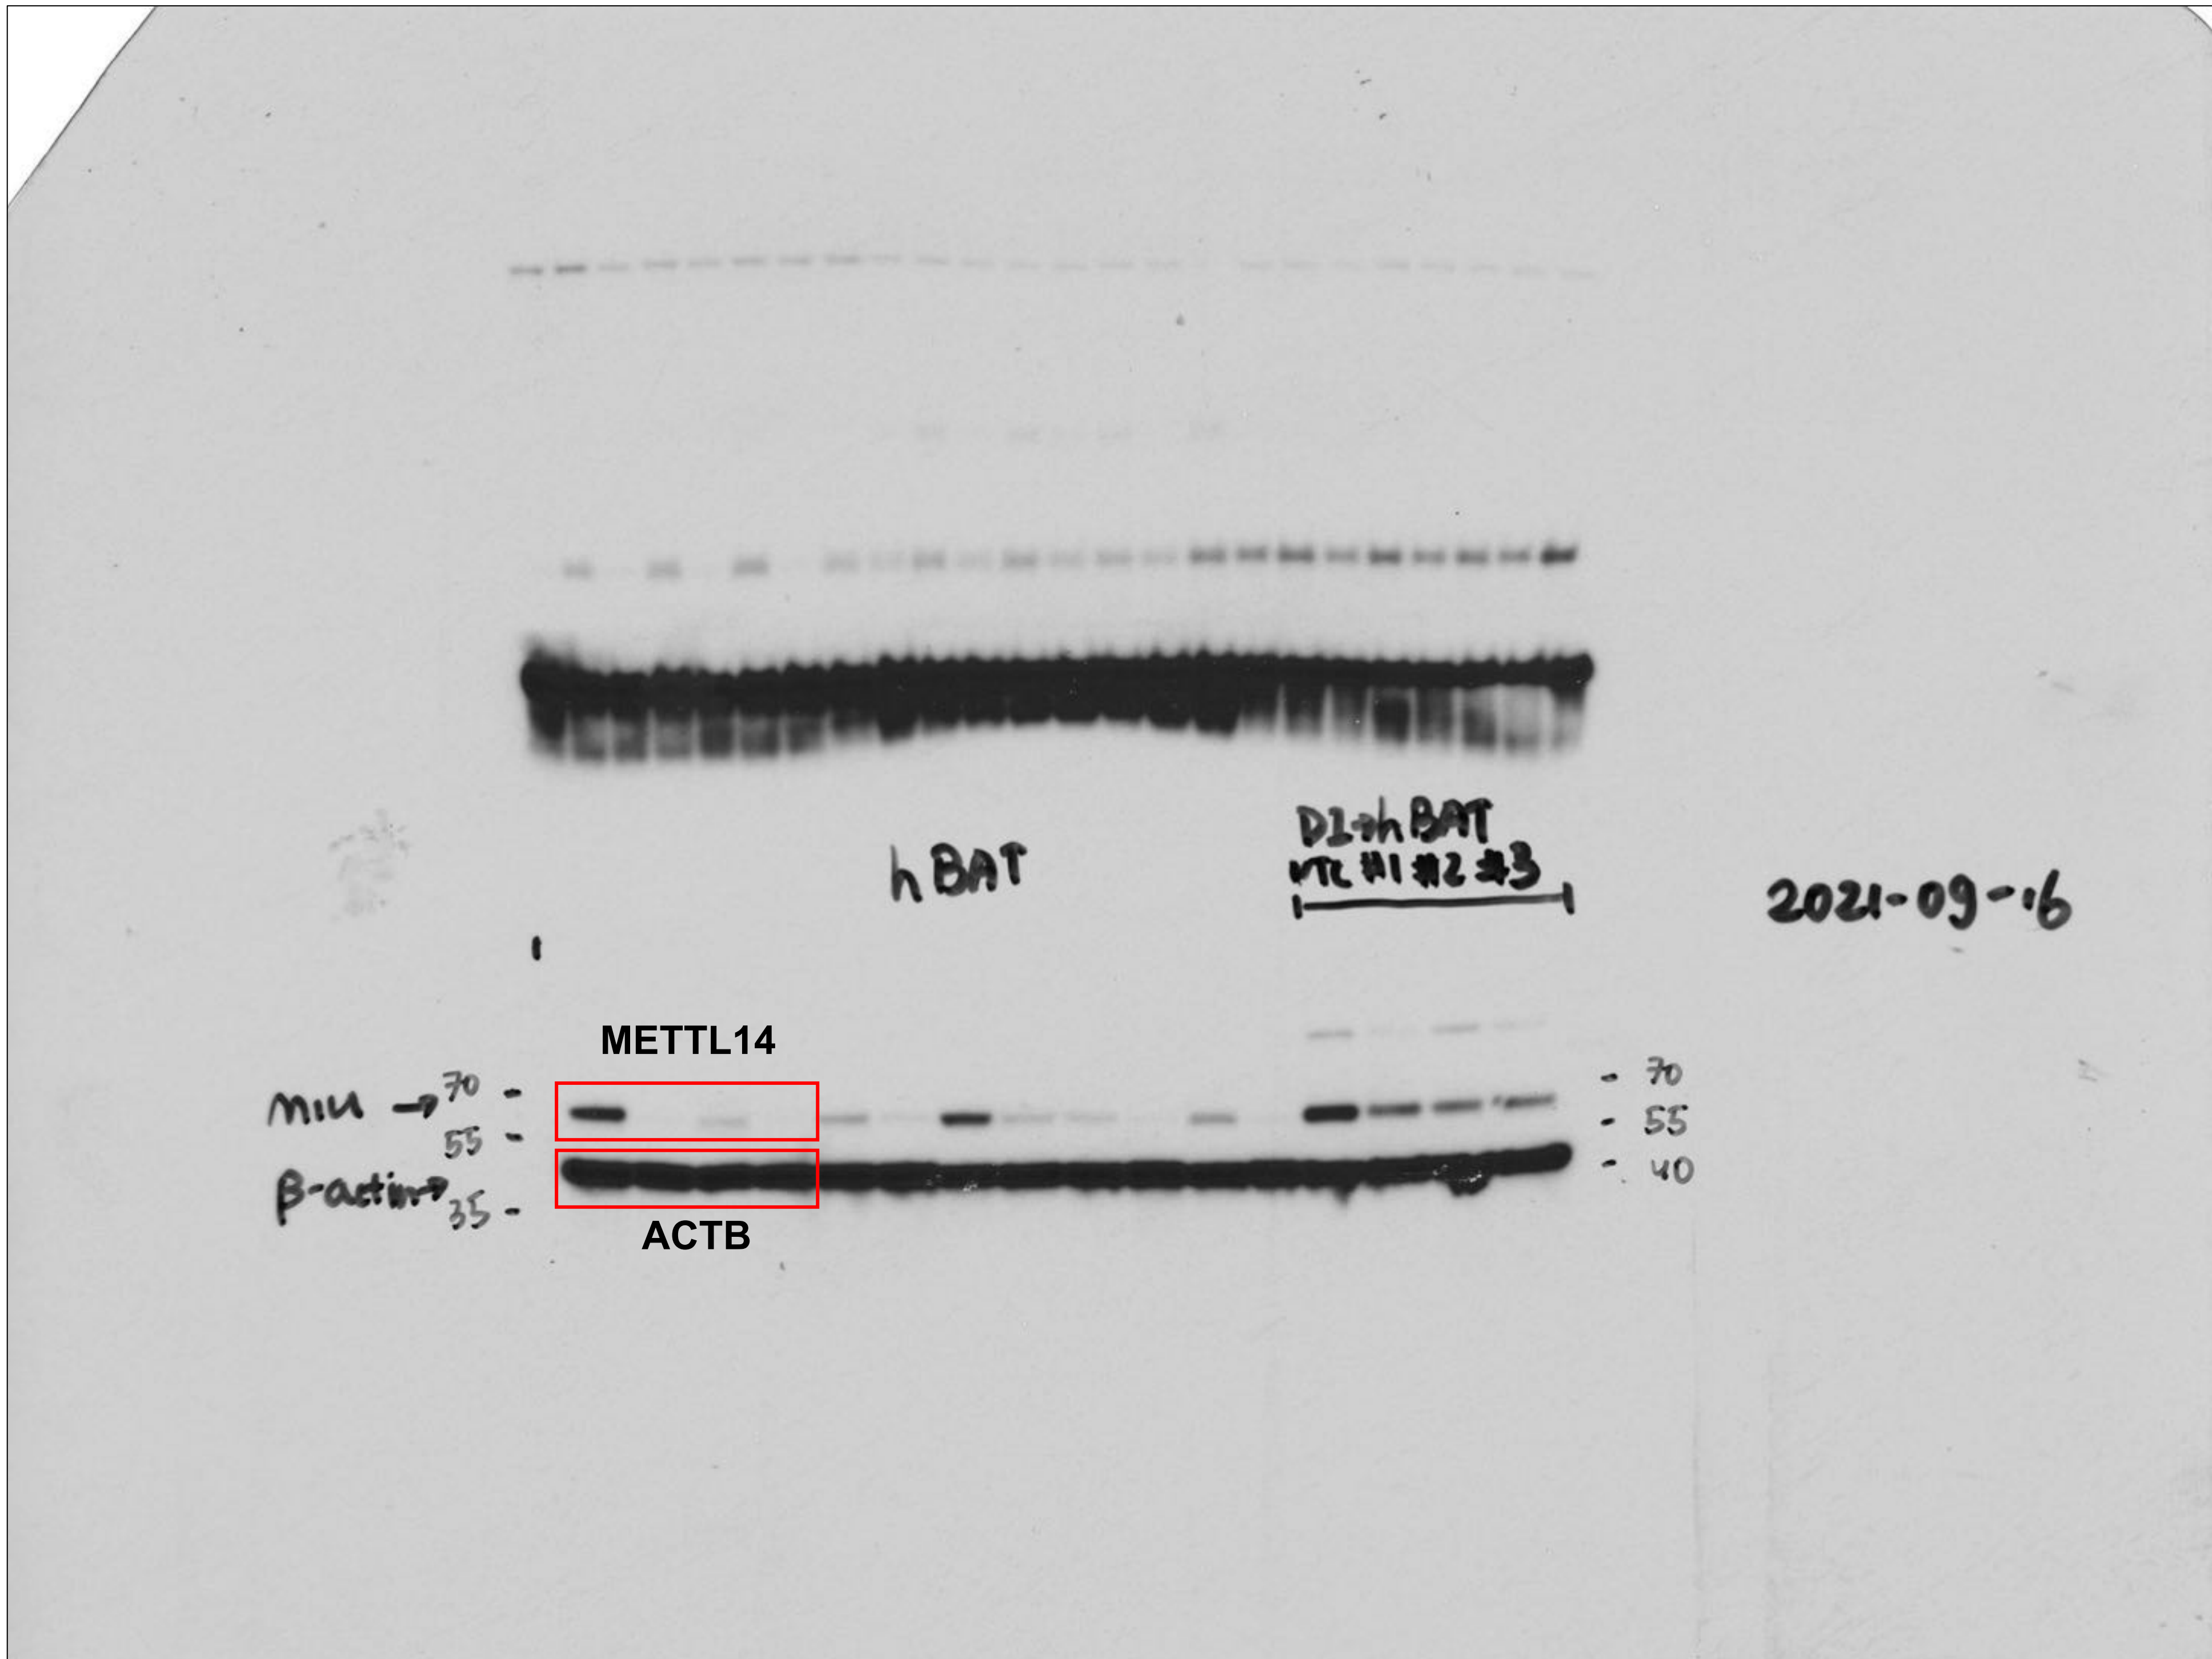



Figure 3h

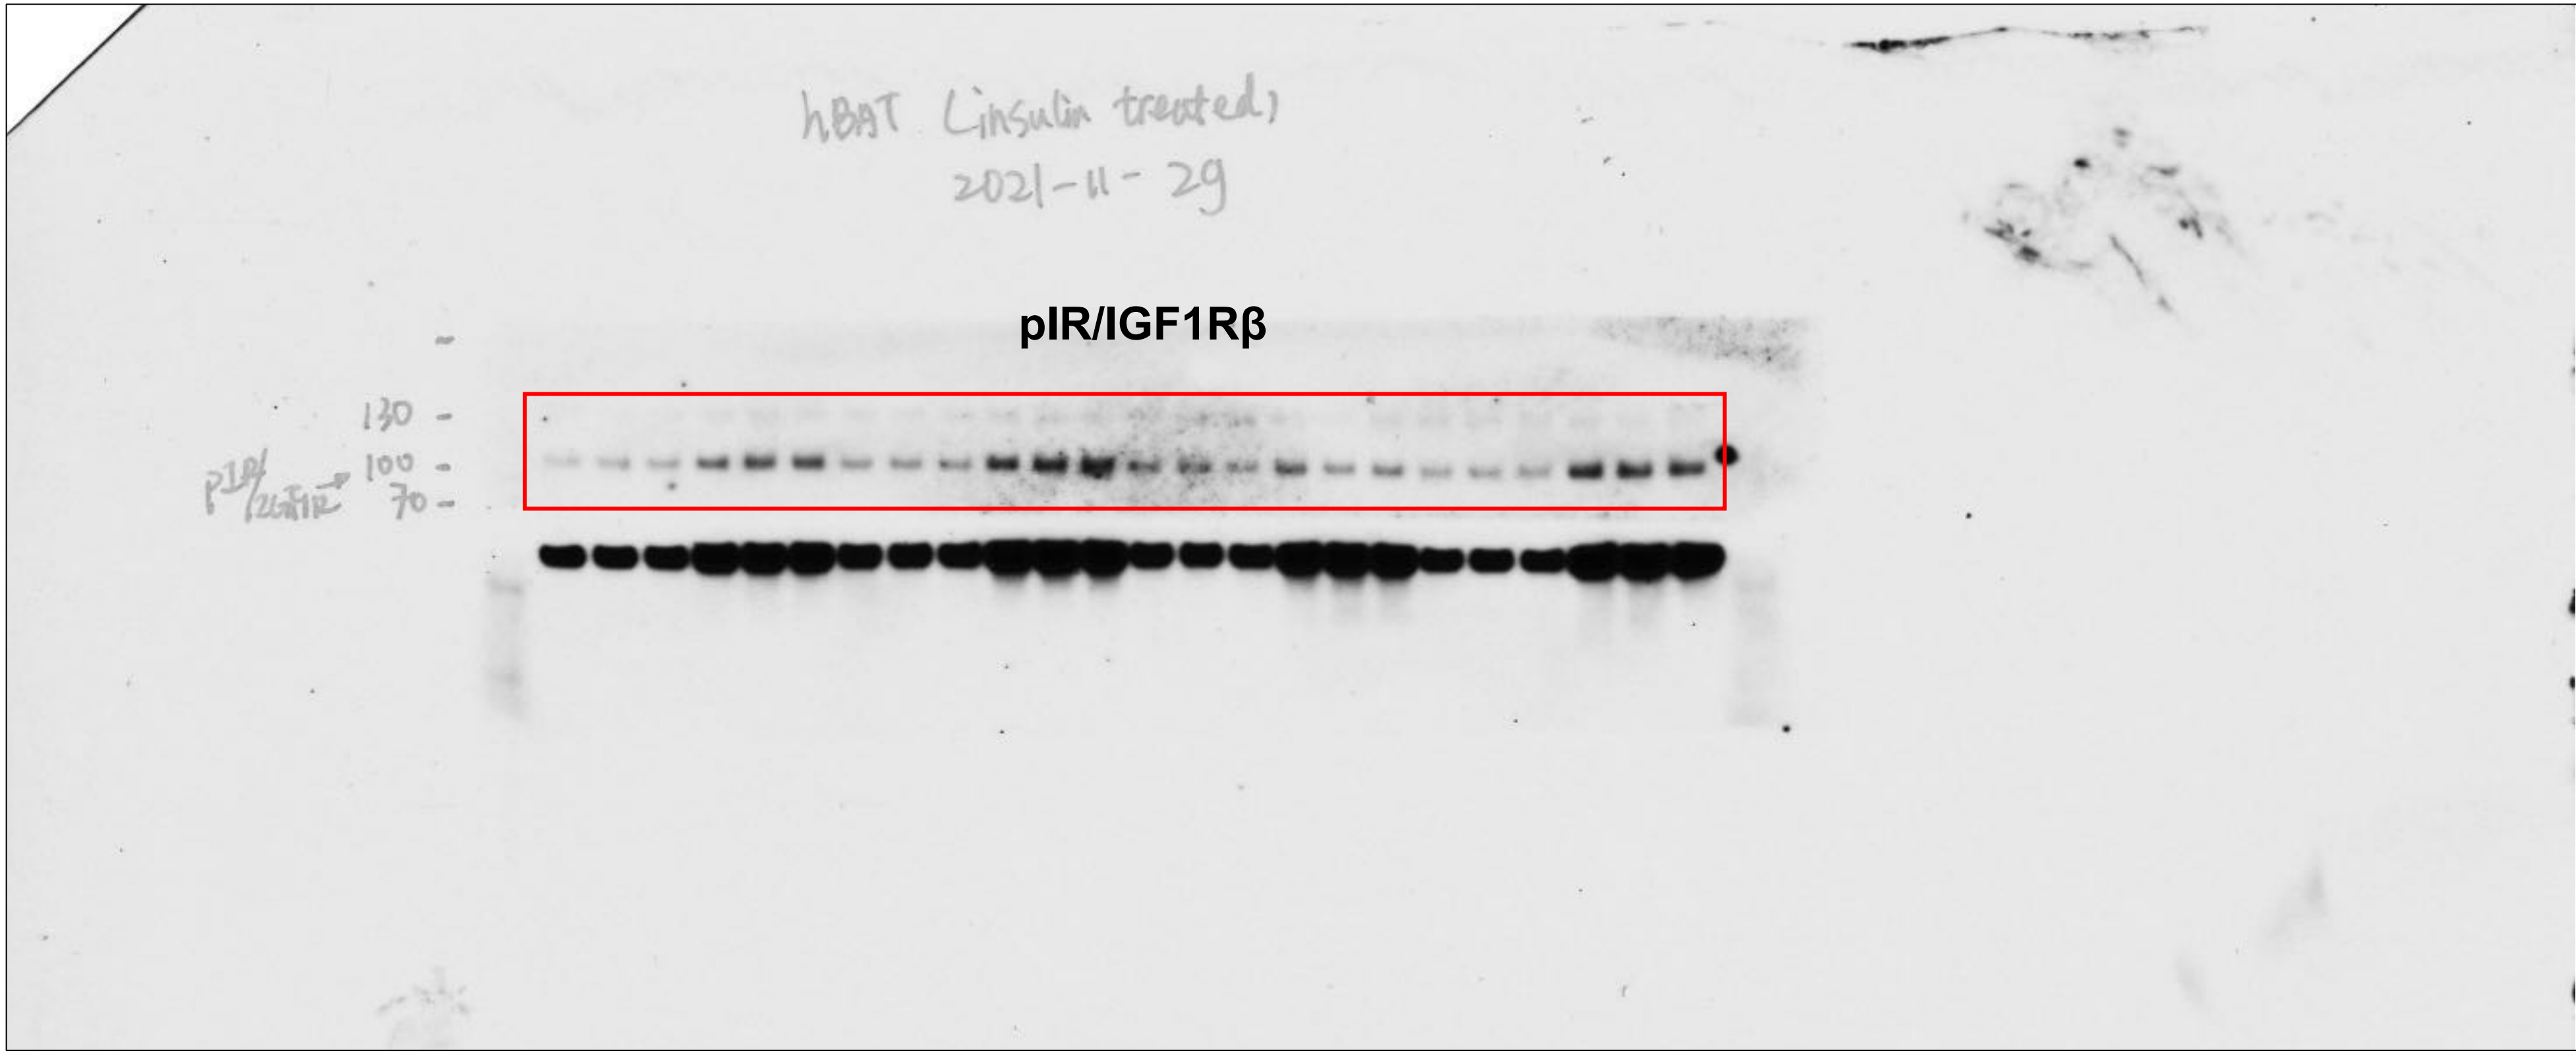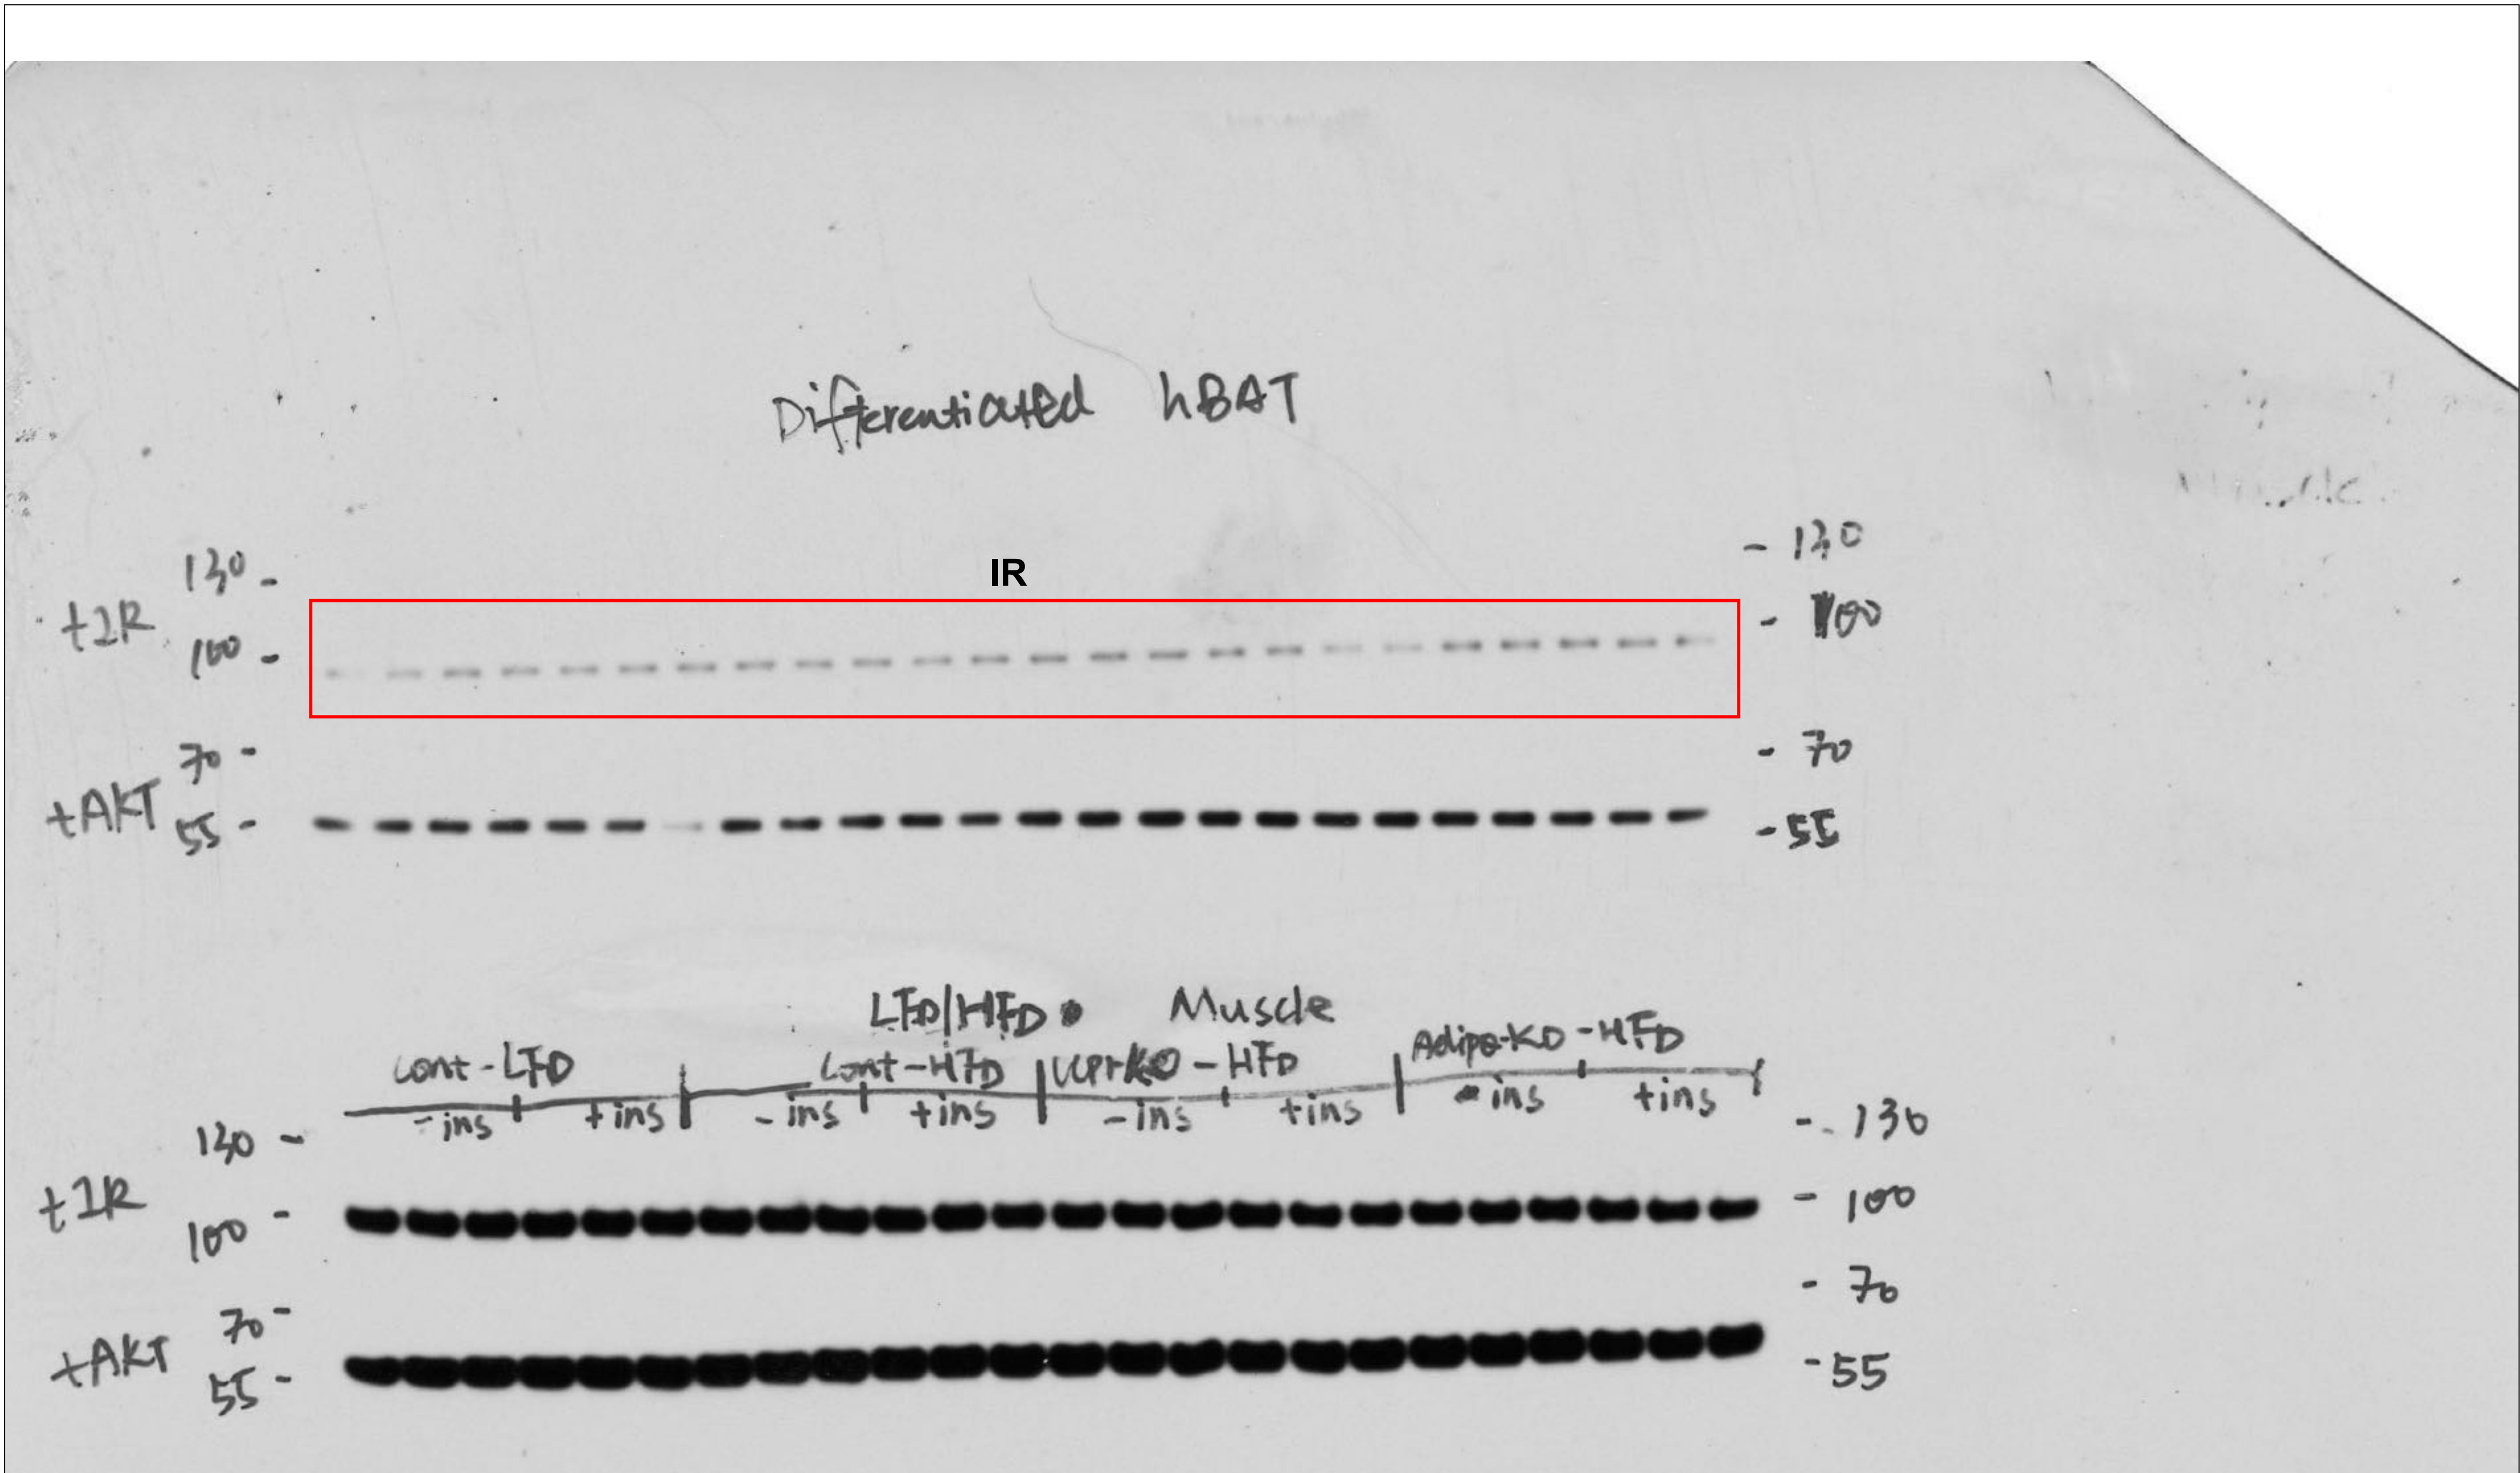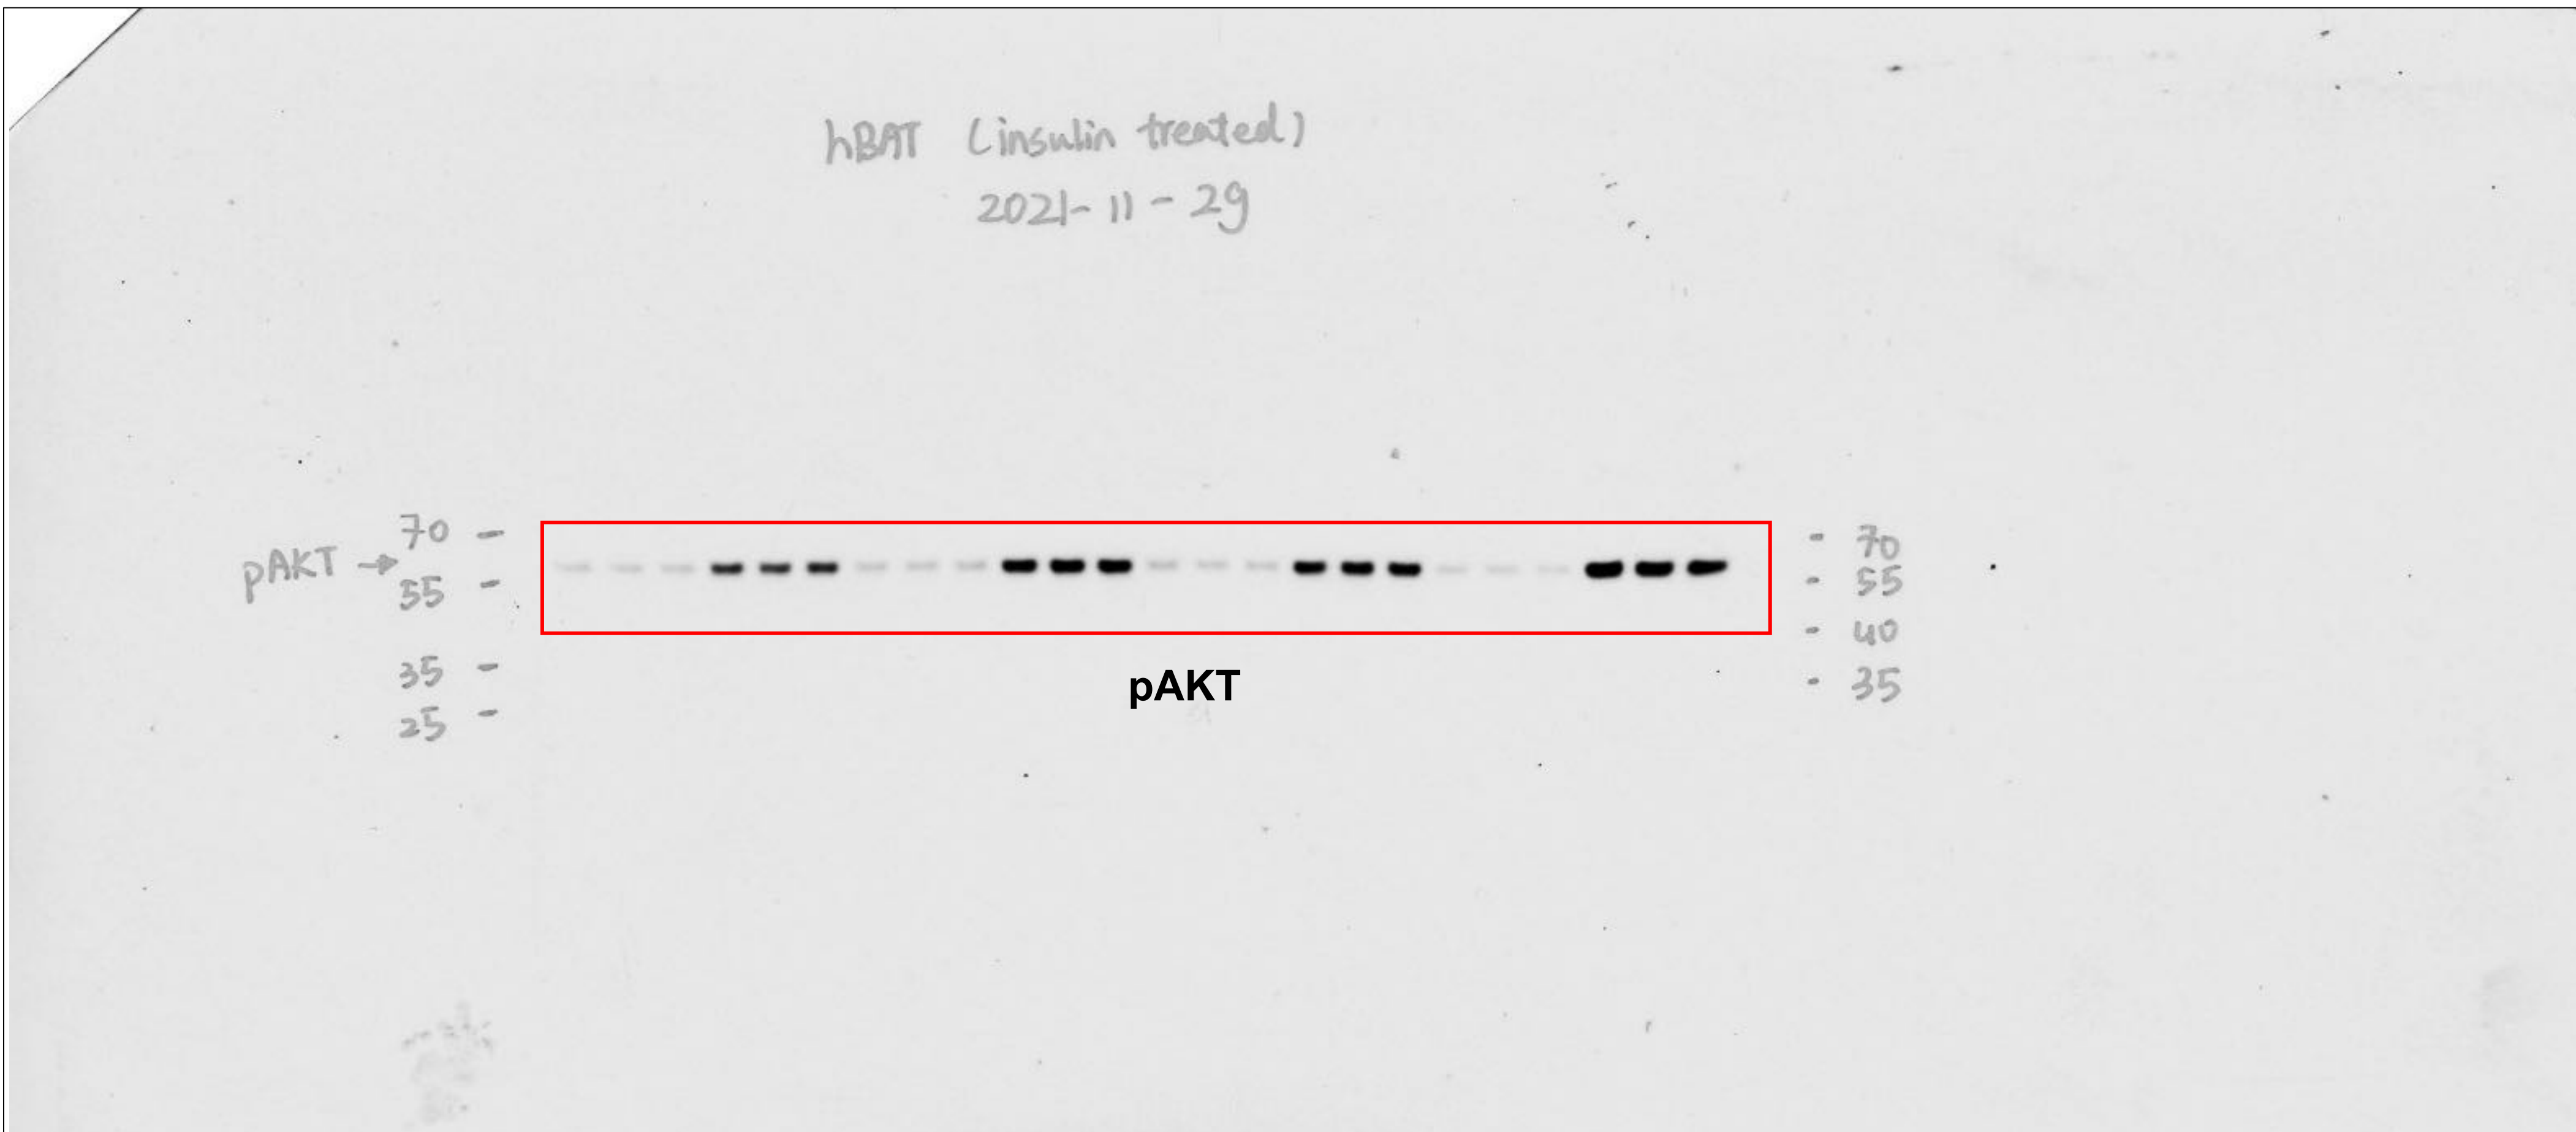



### Figure 3h

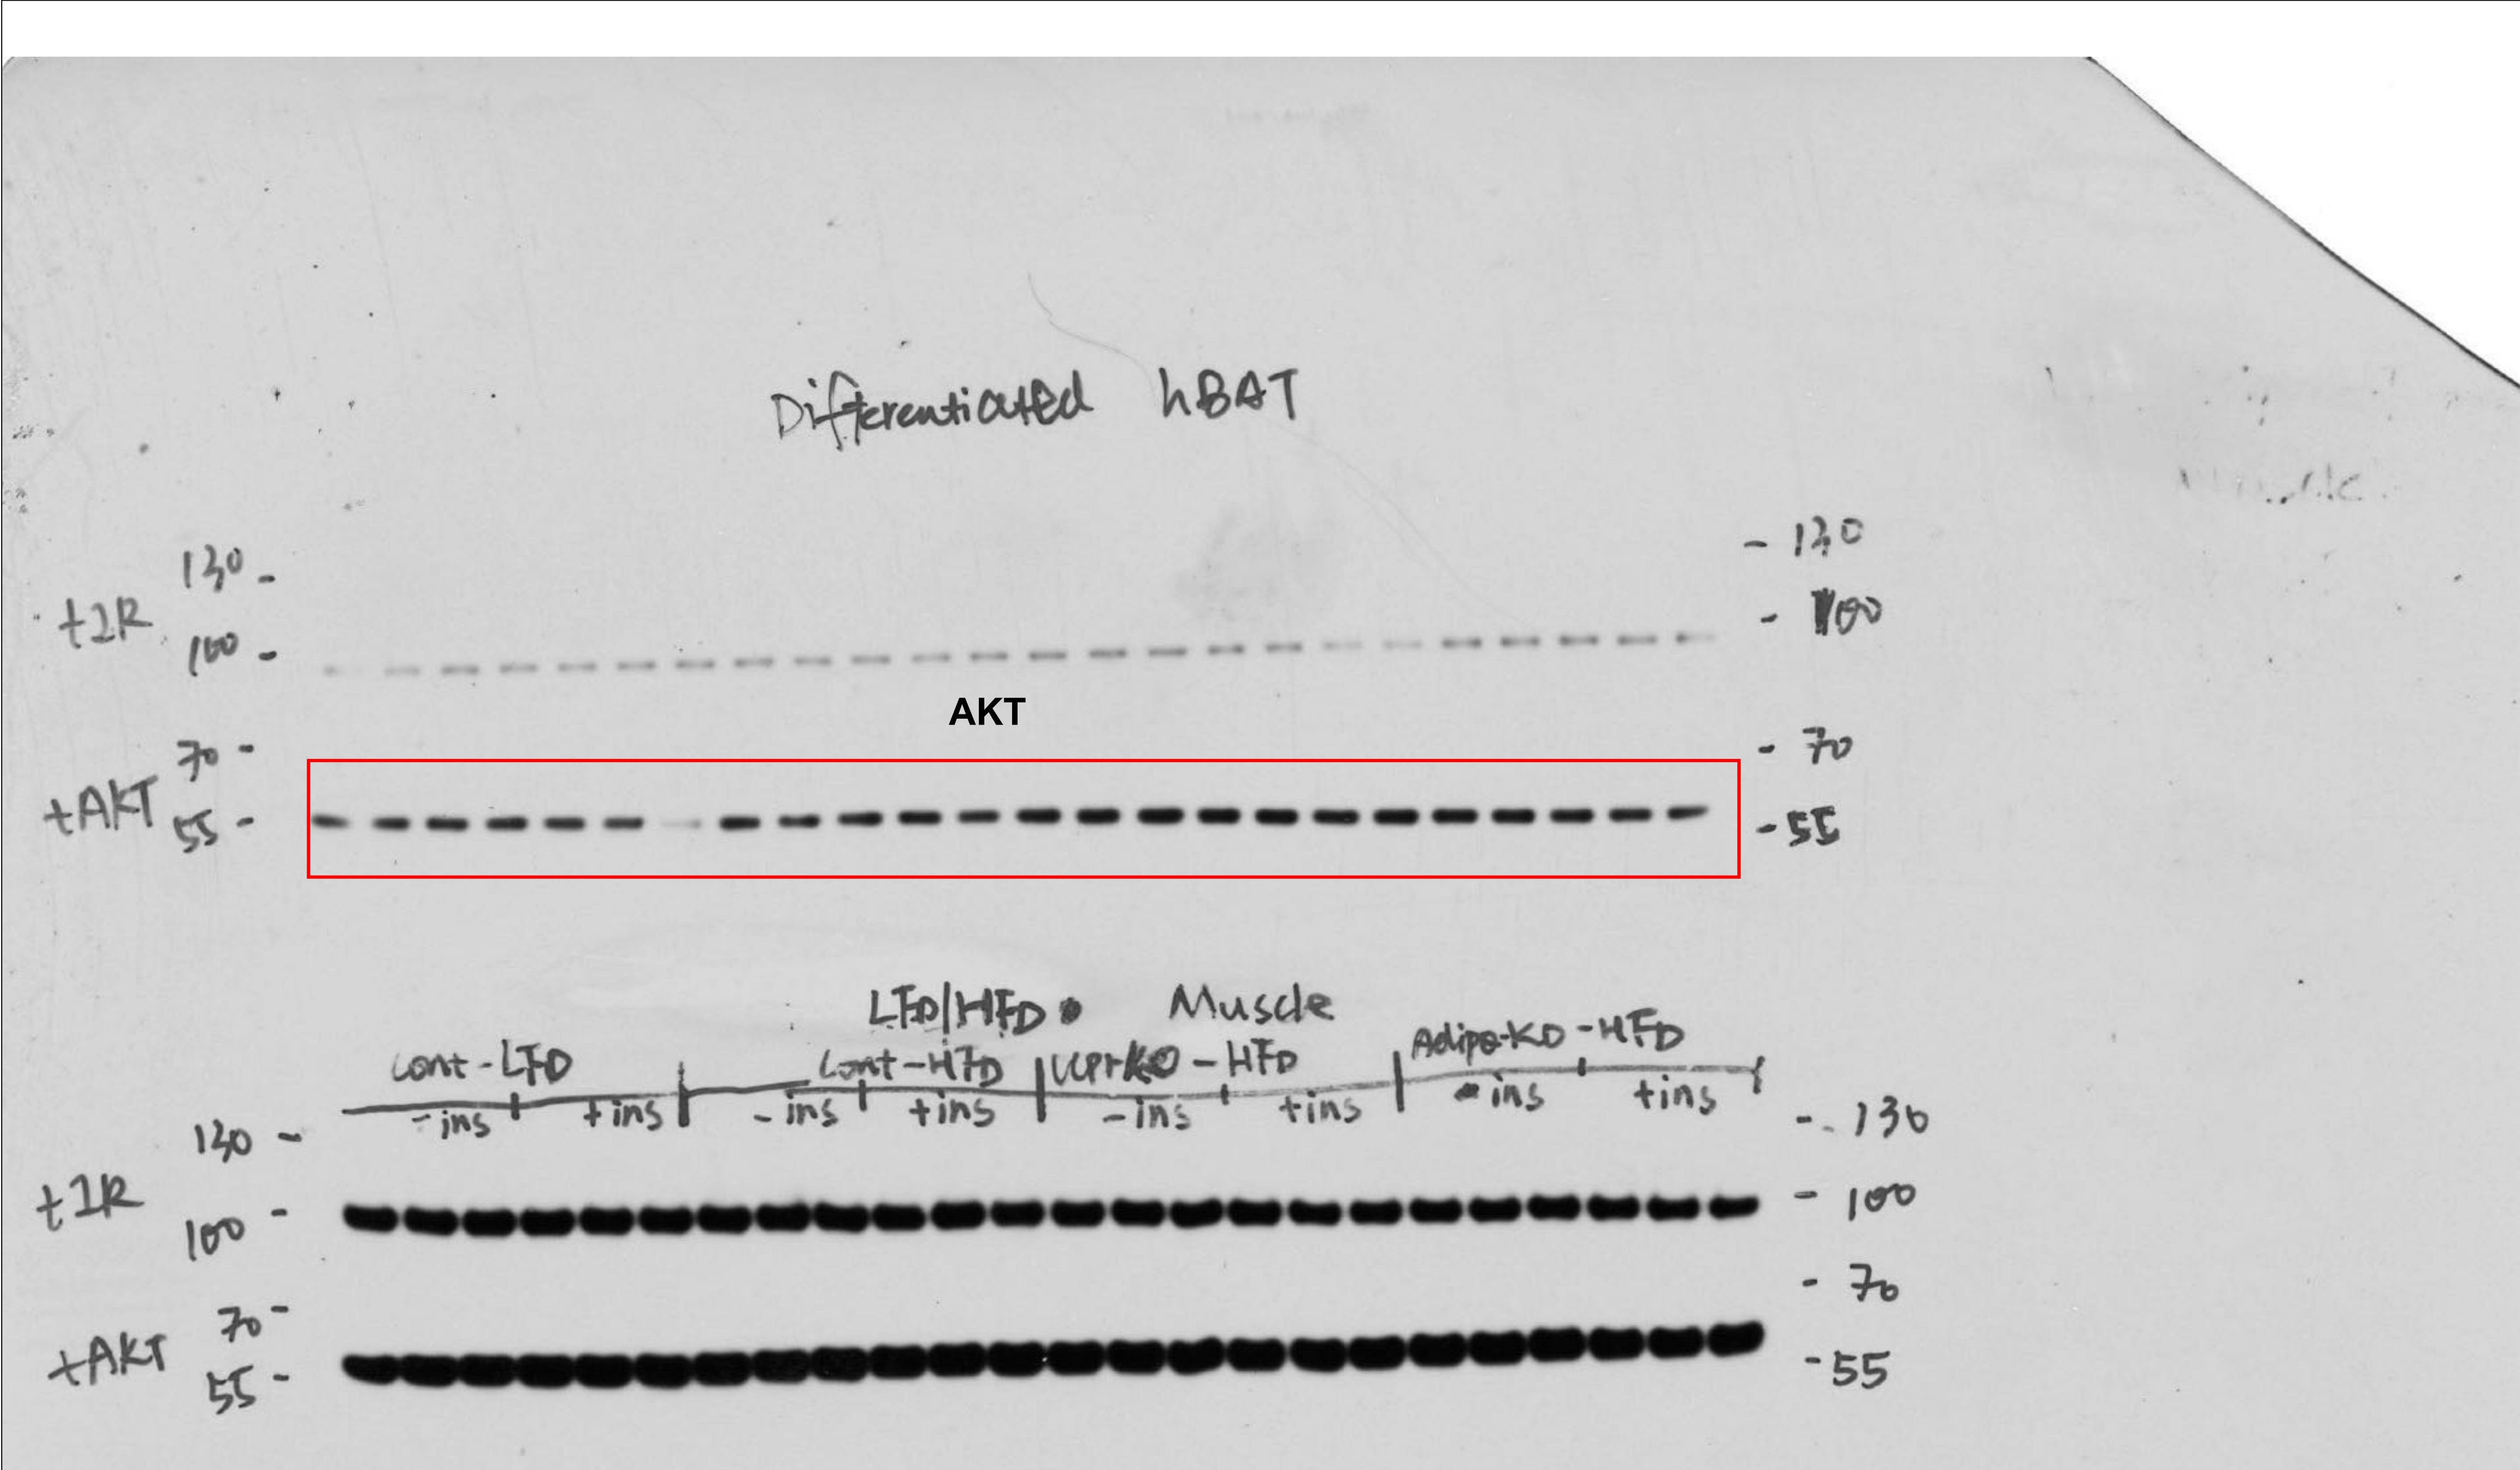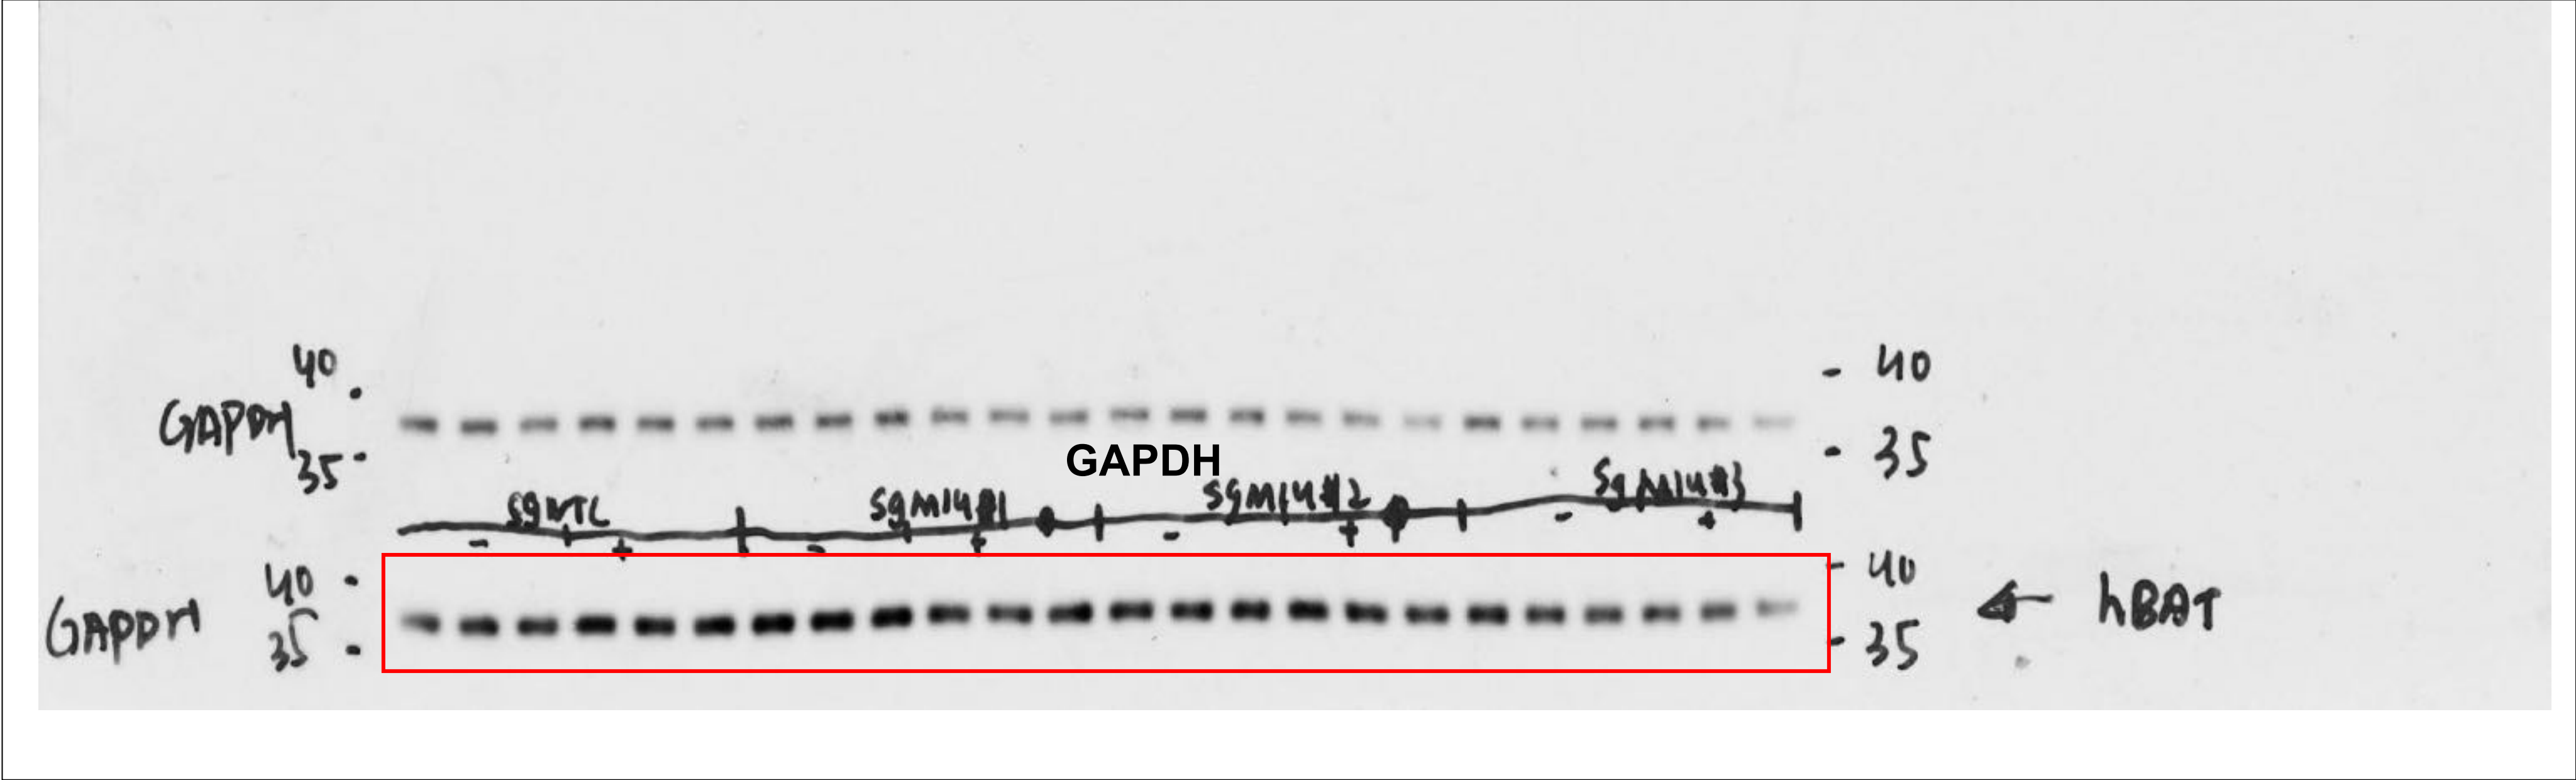



Figure 3k

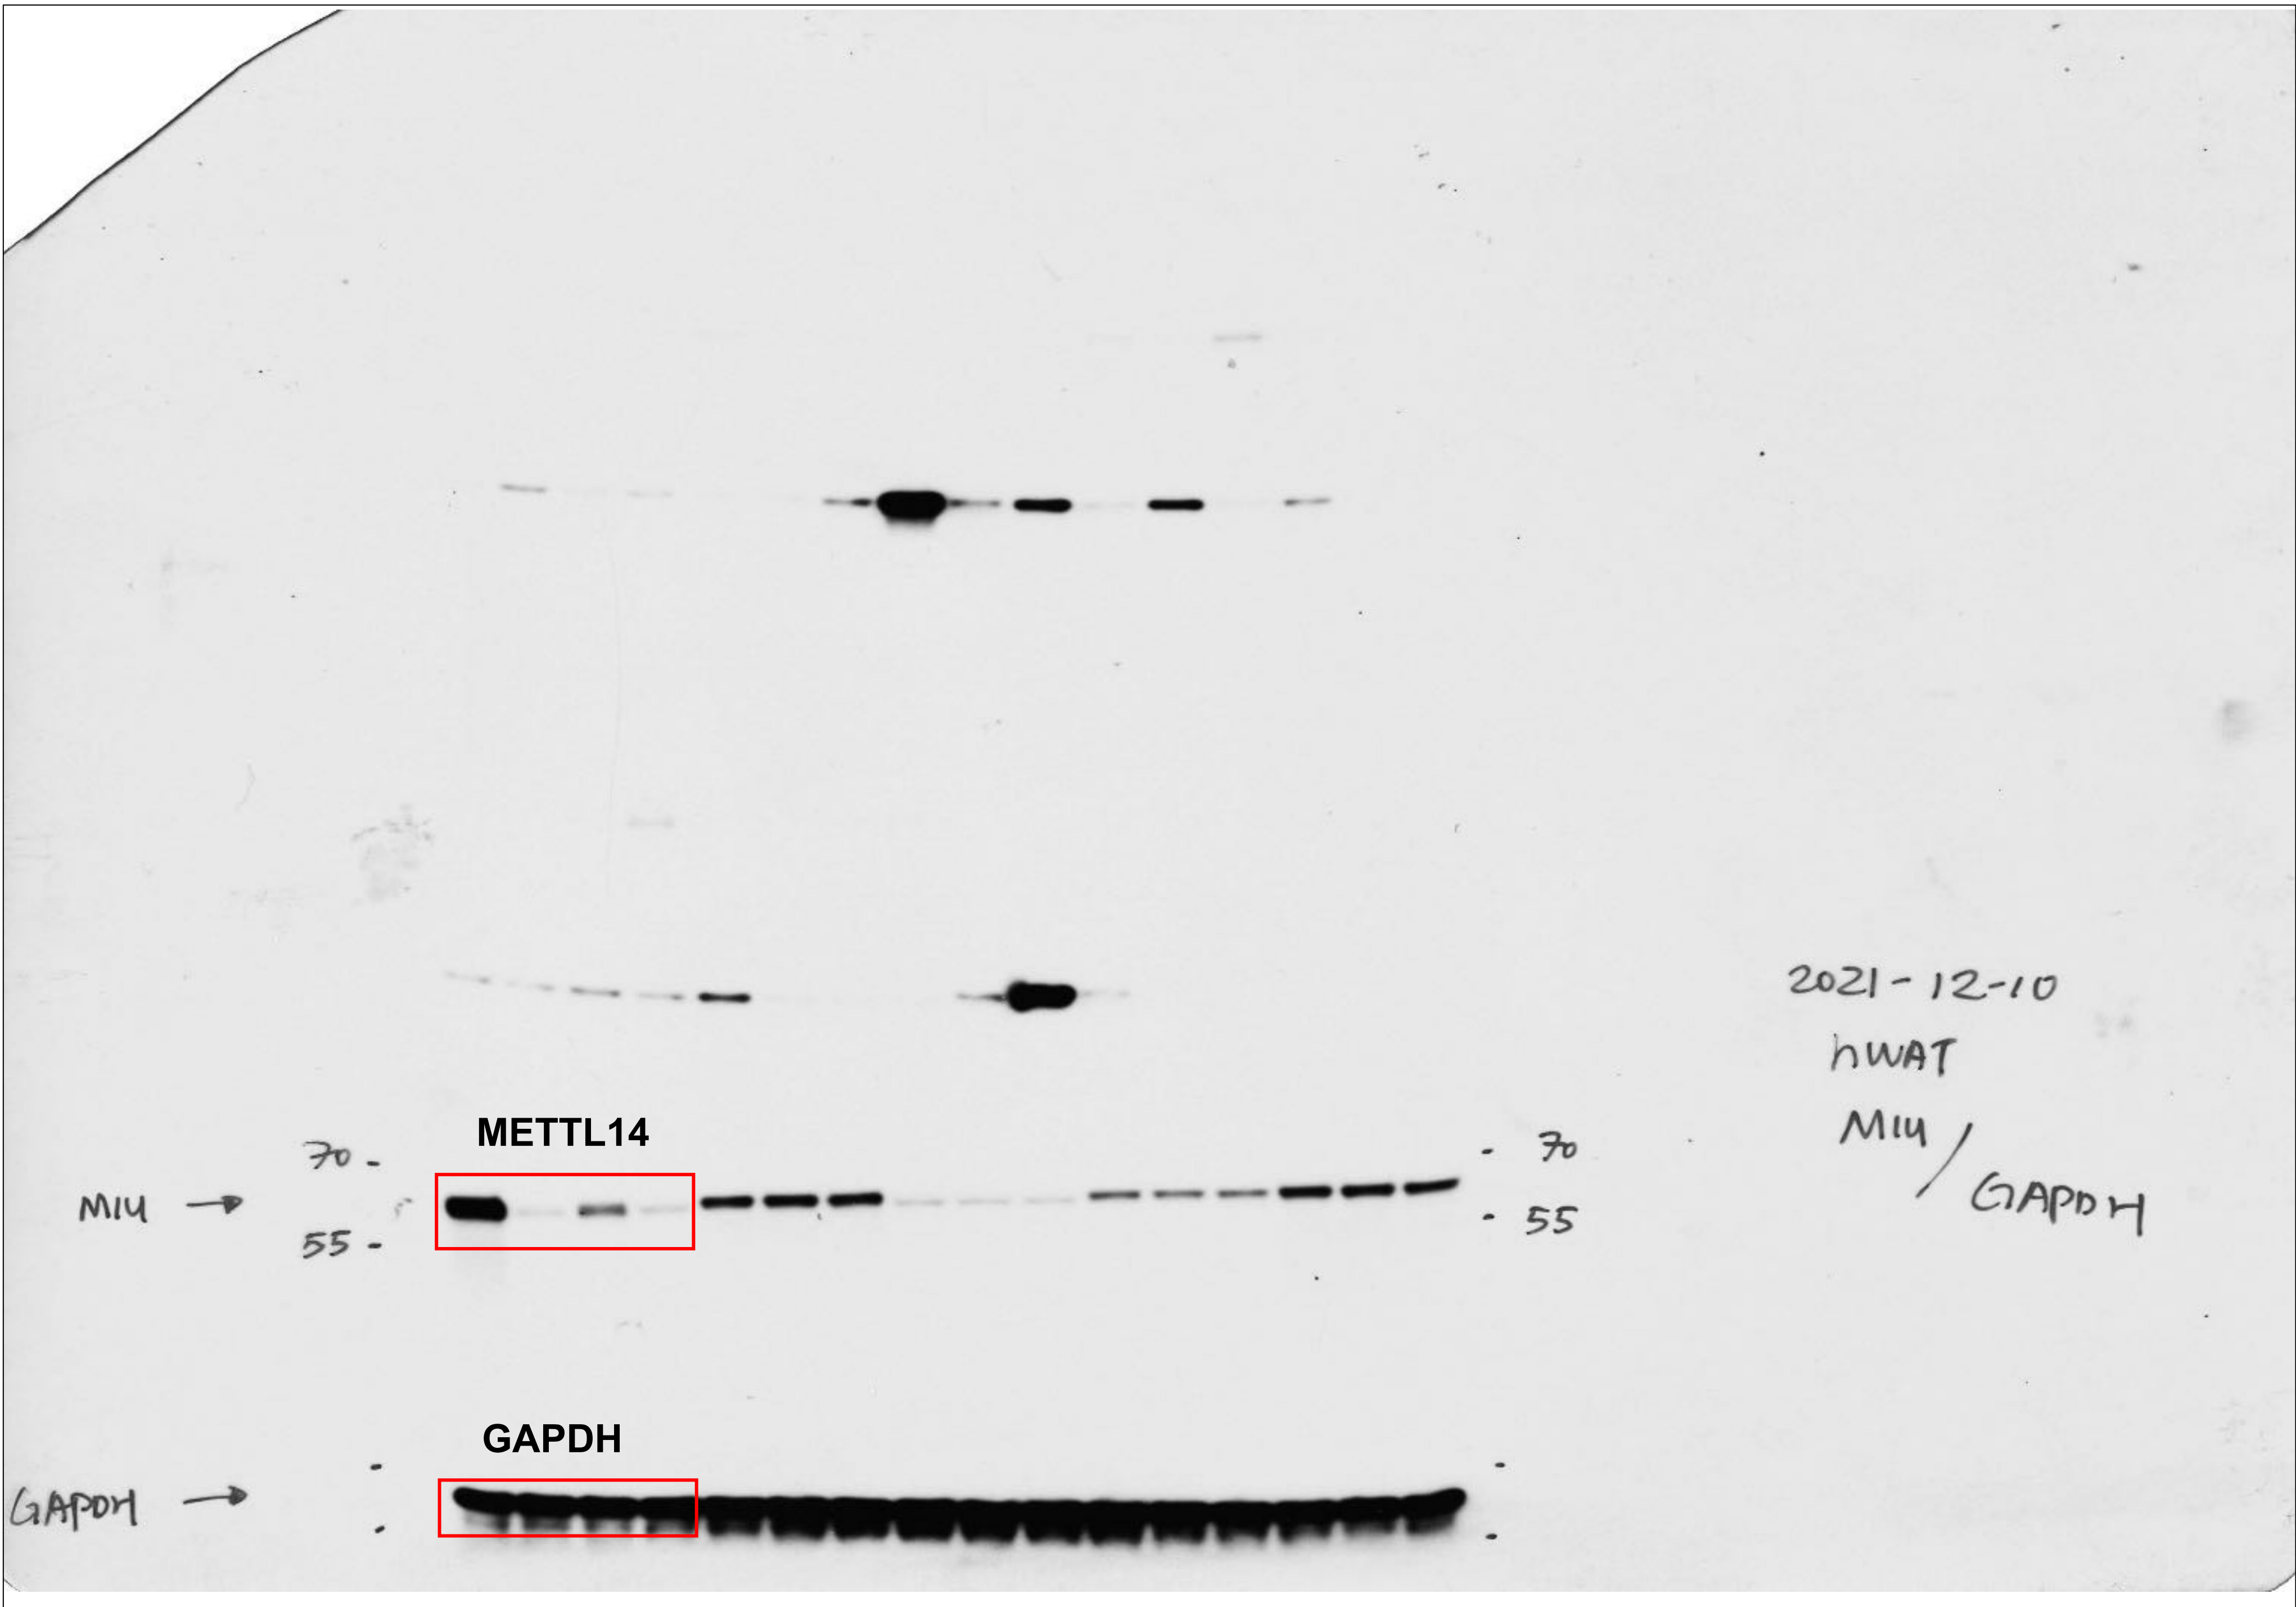



Figure 3I

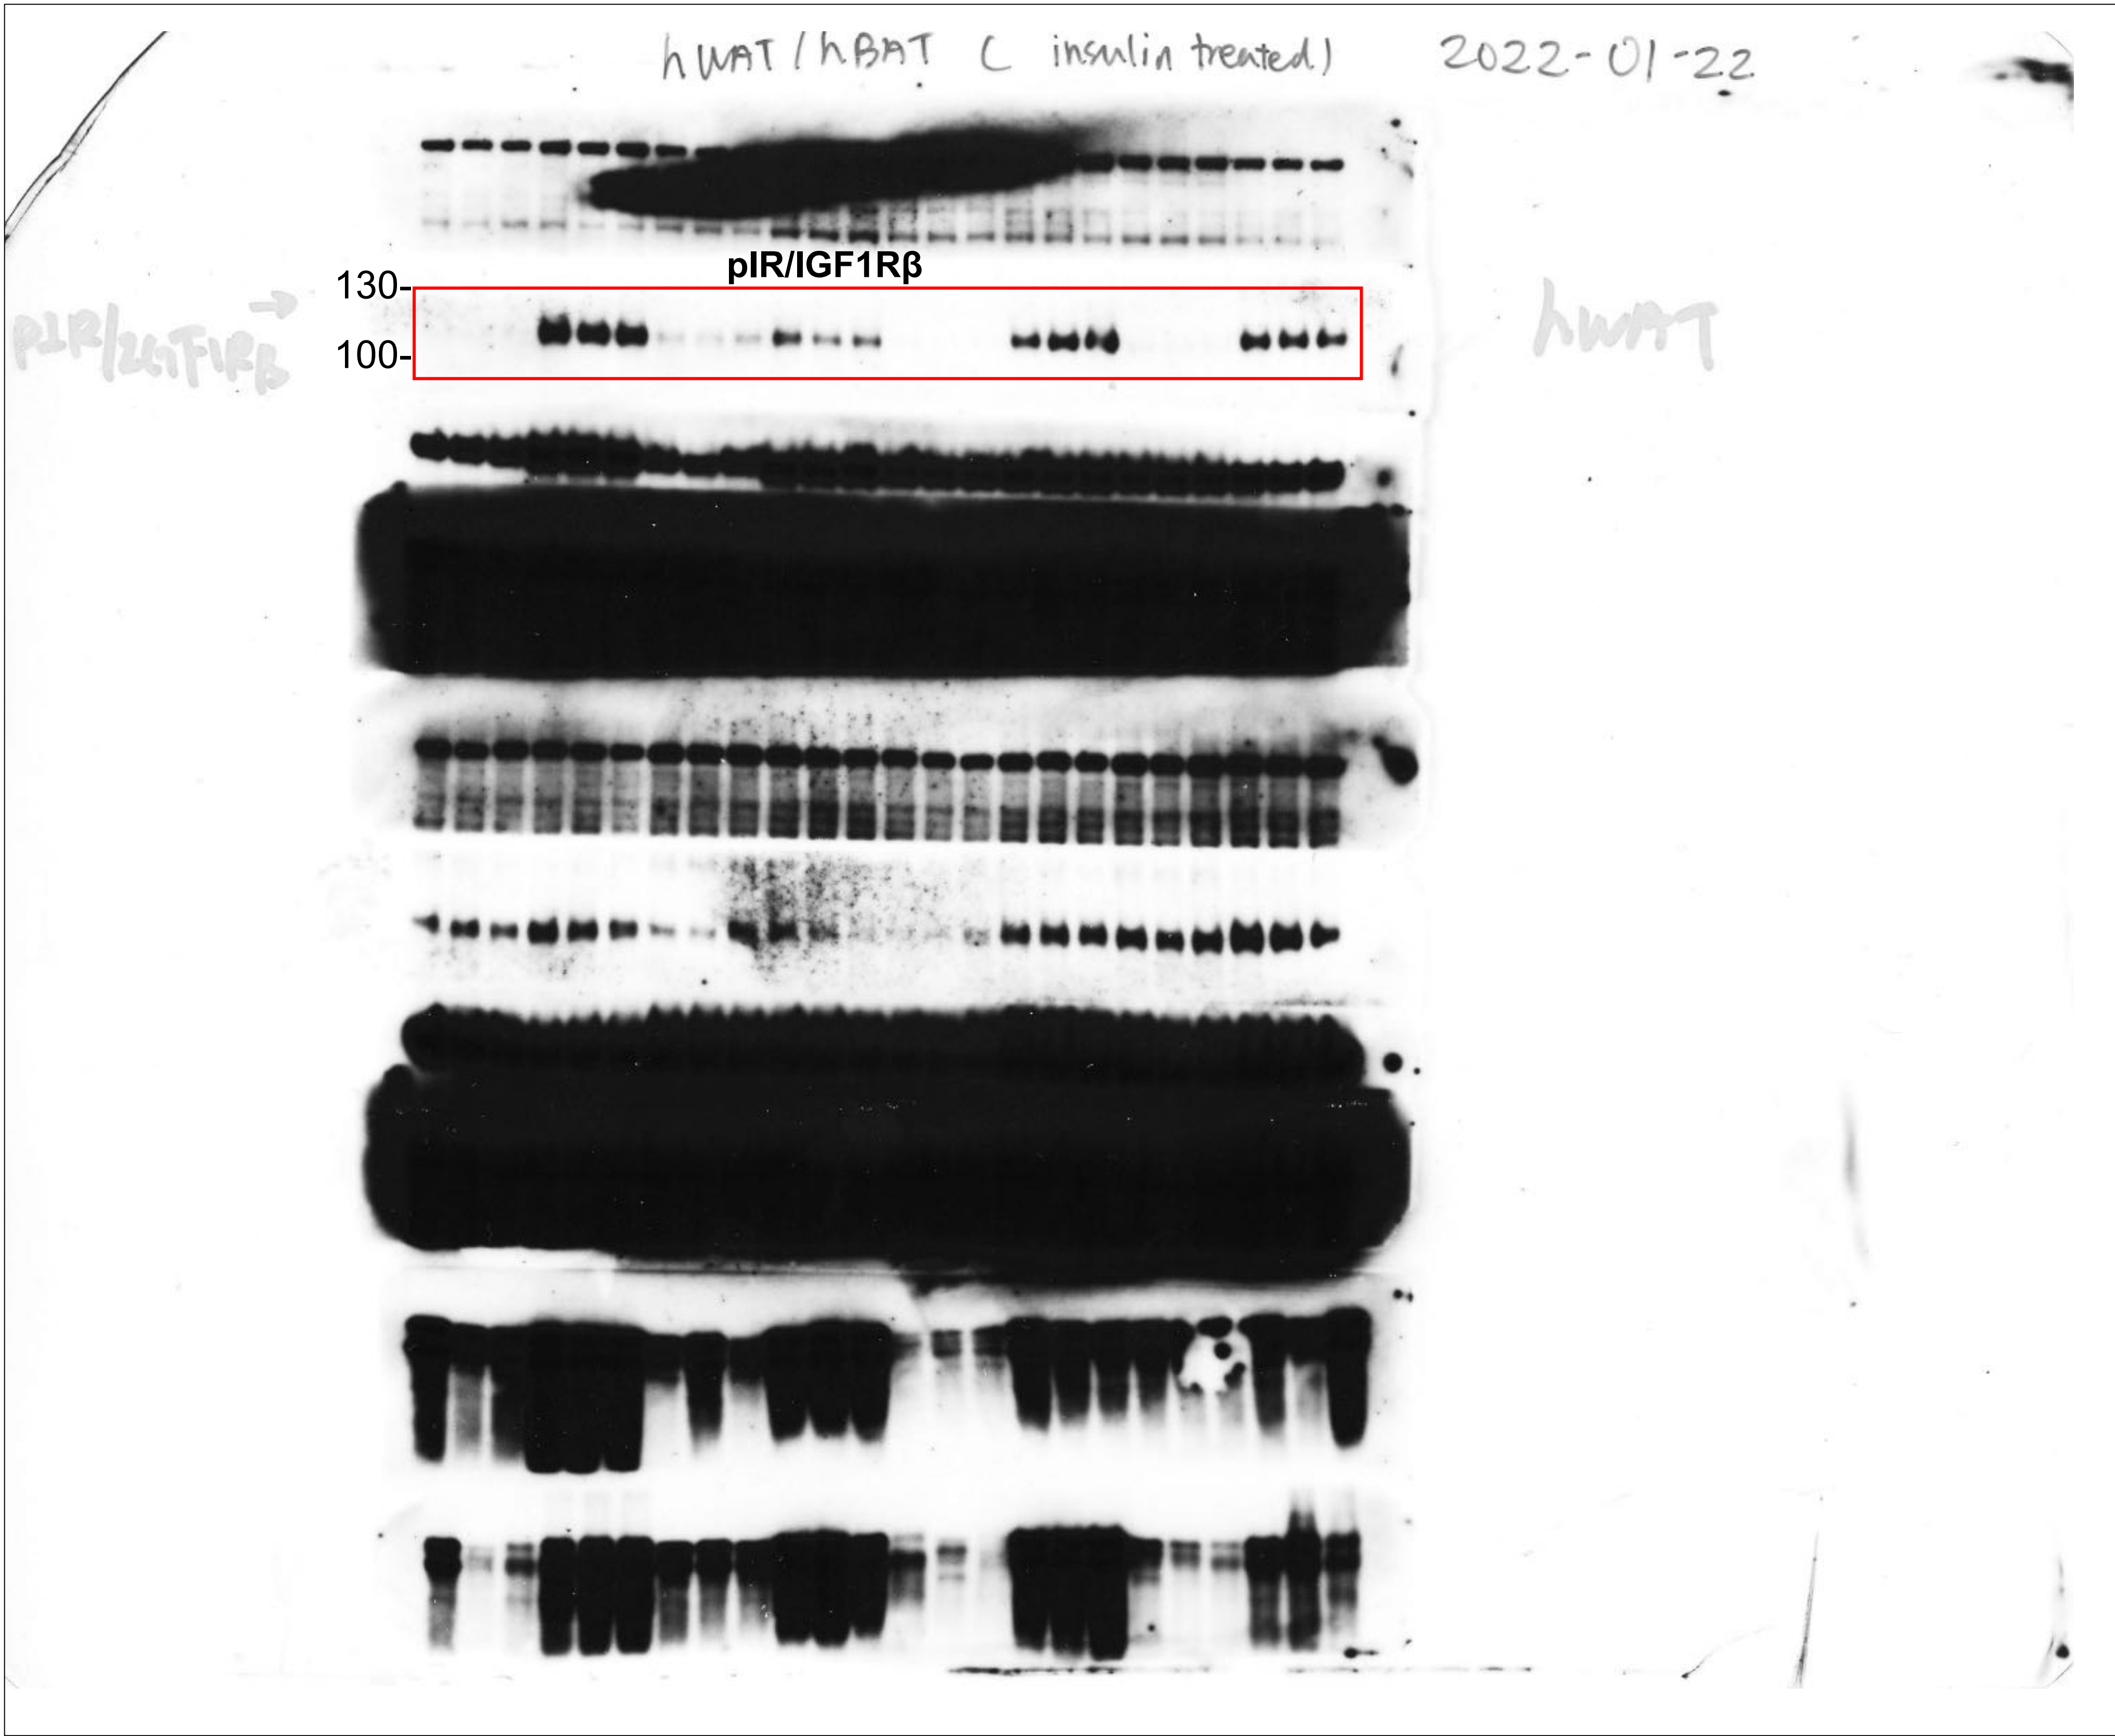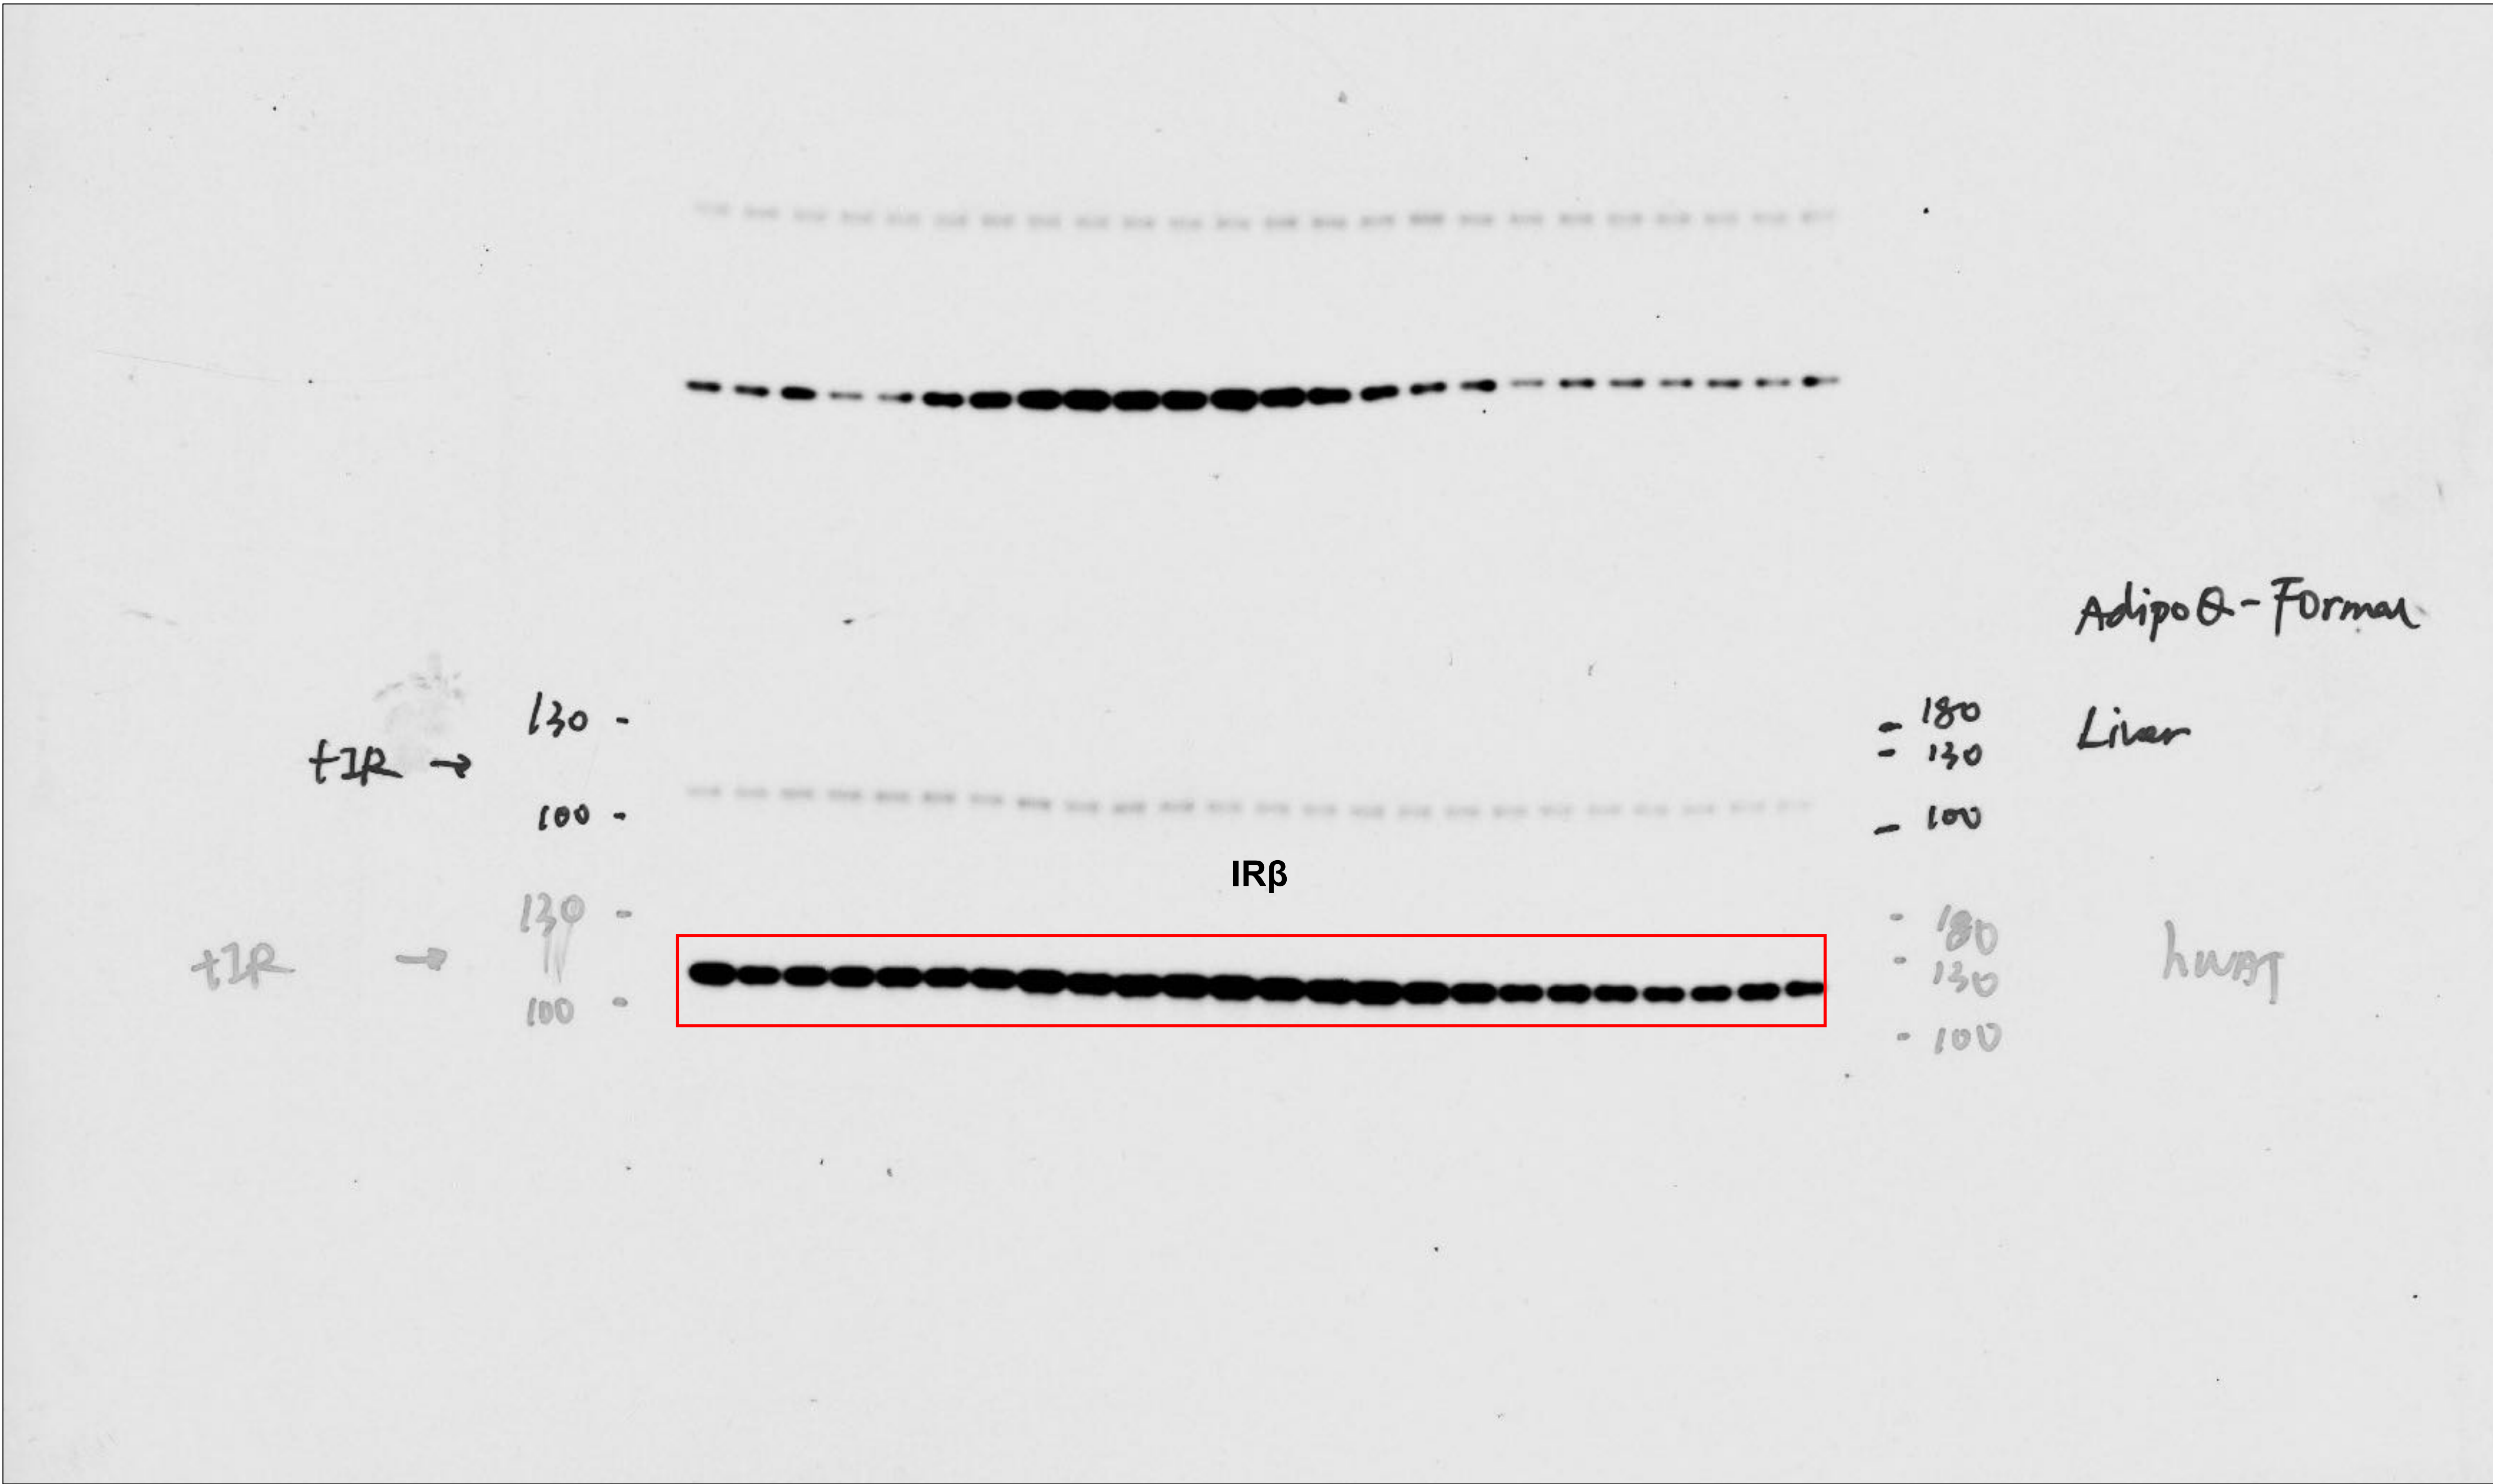



Figure 3I

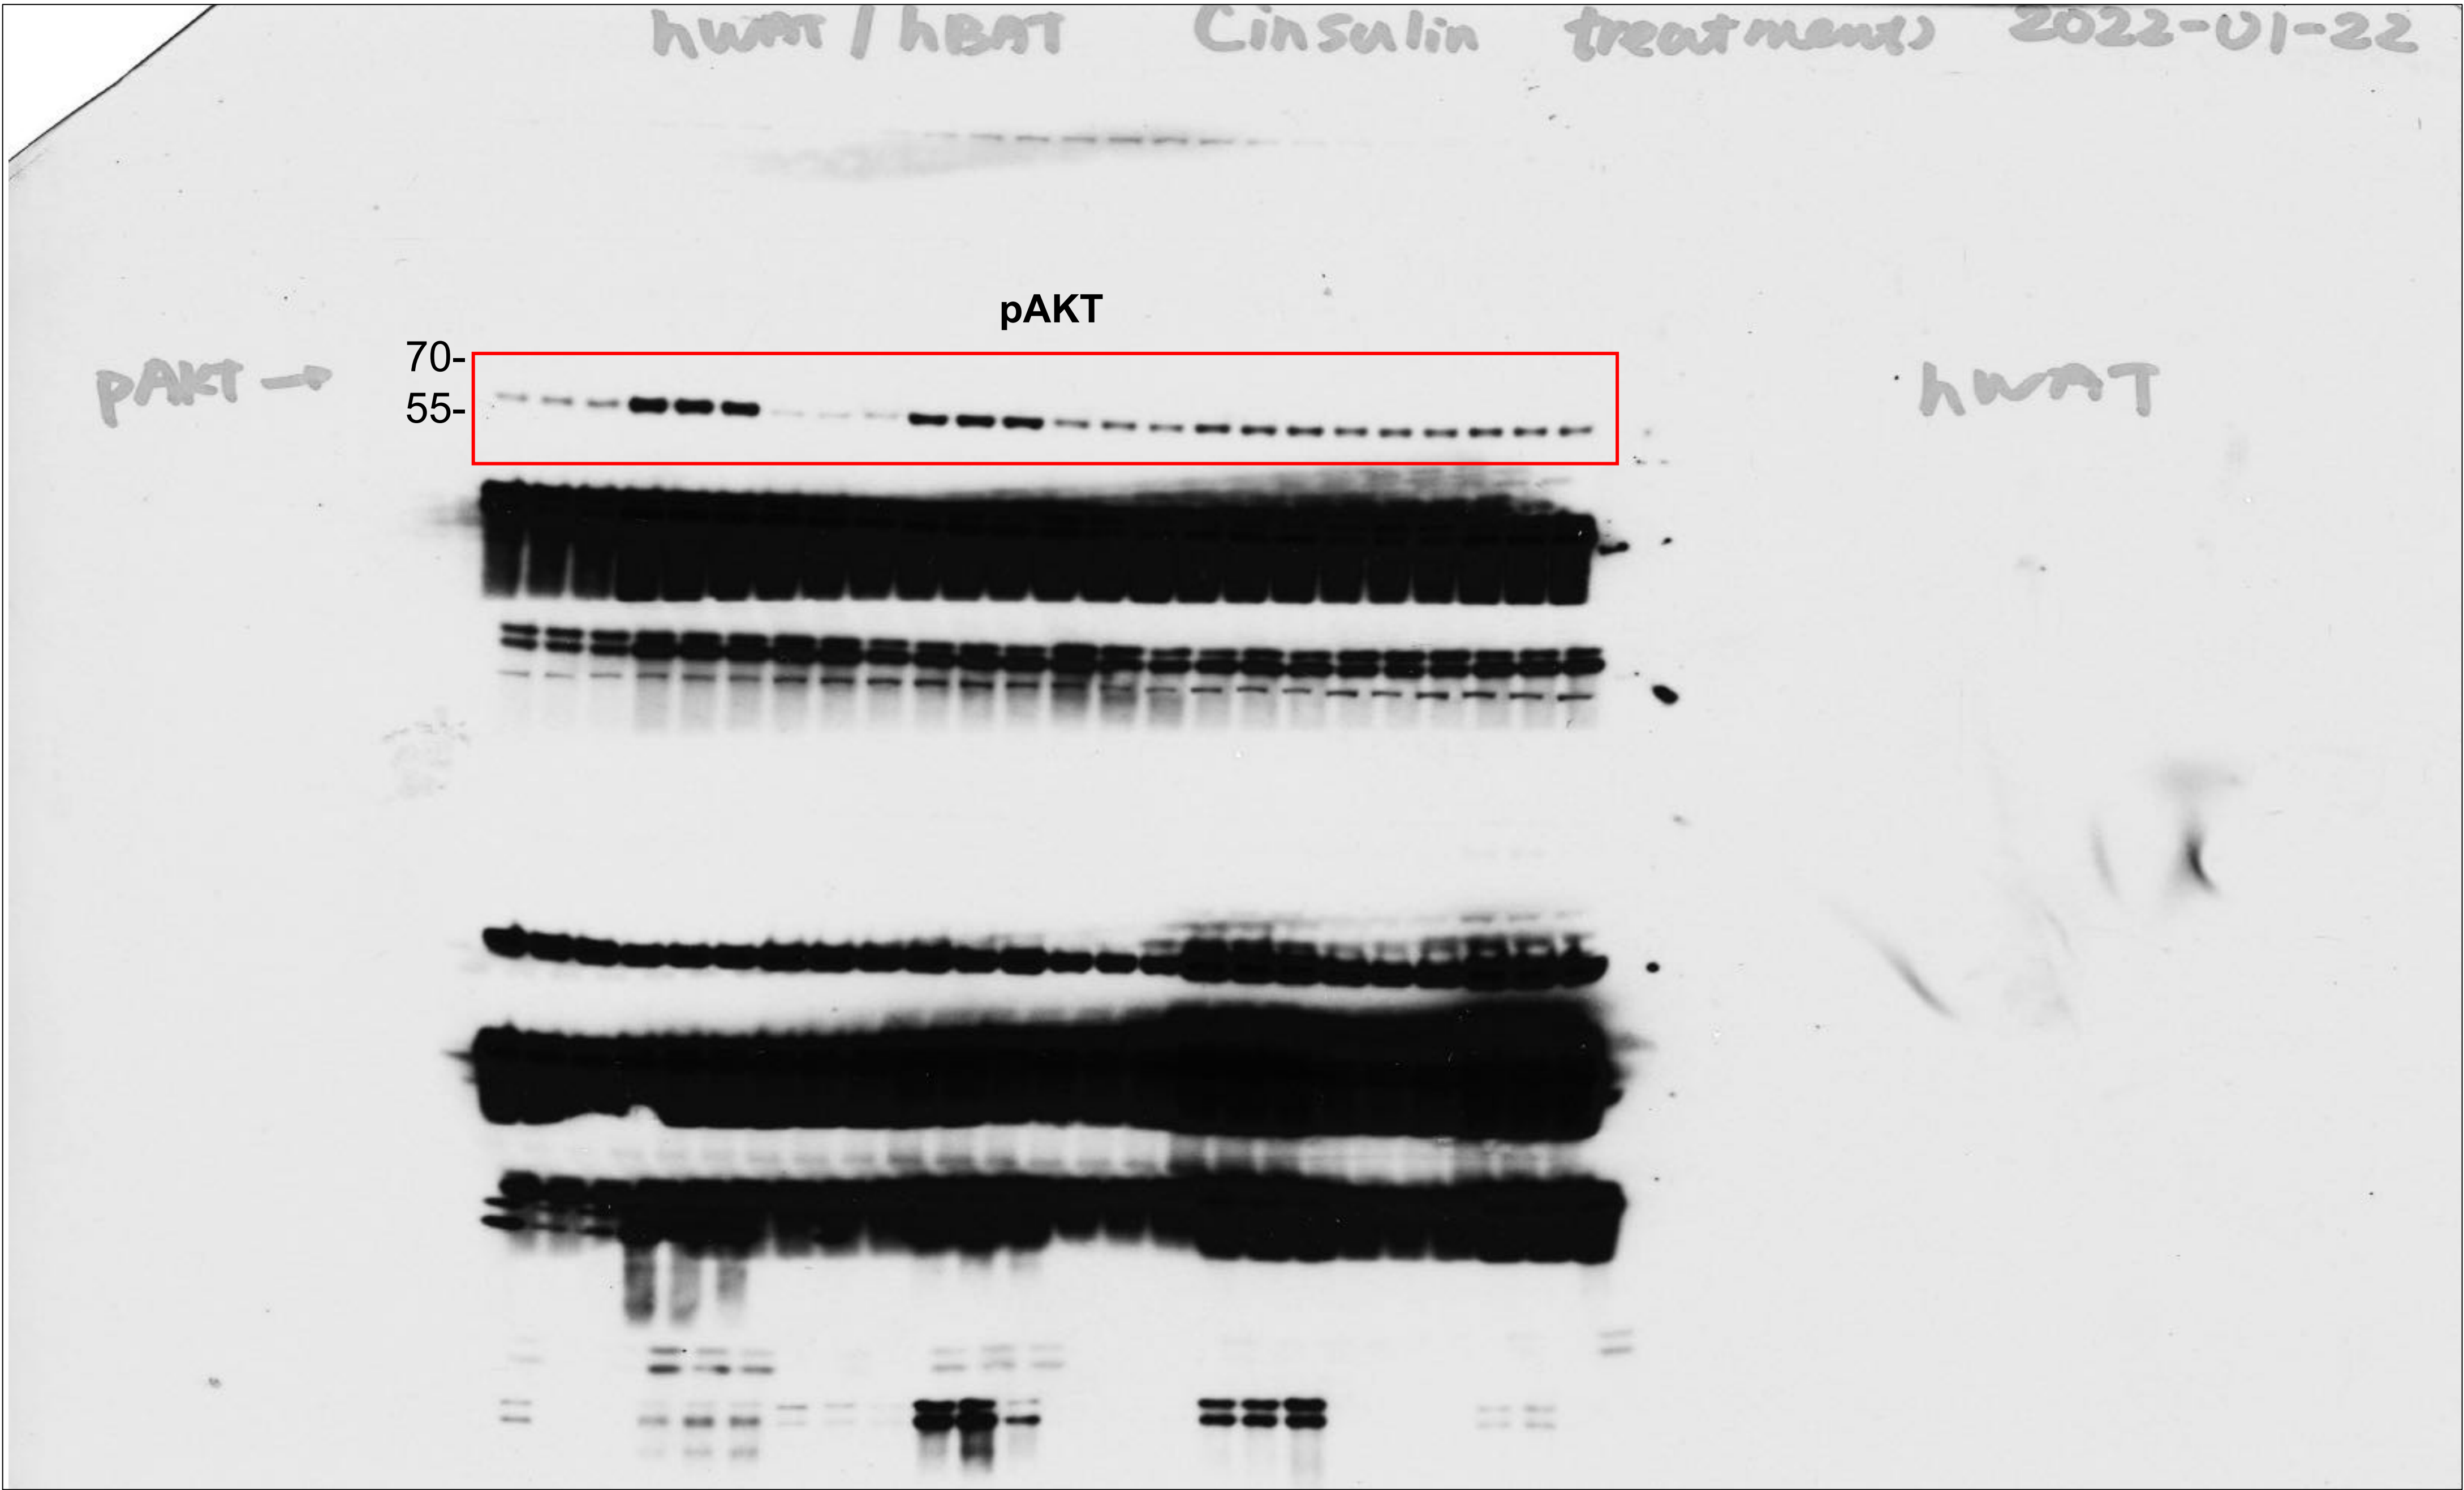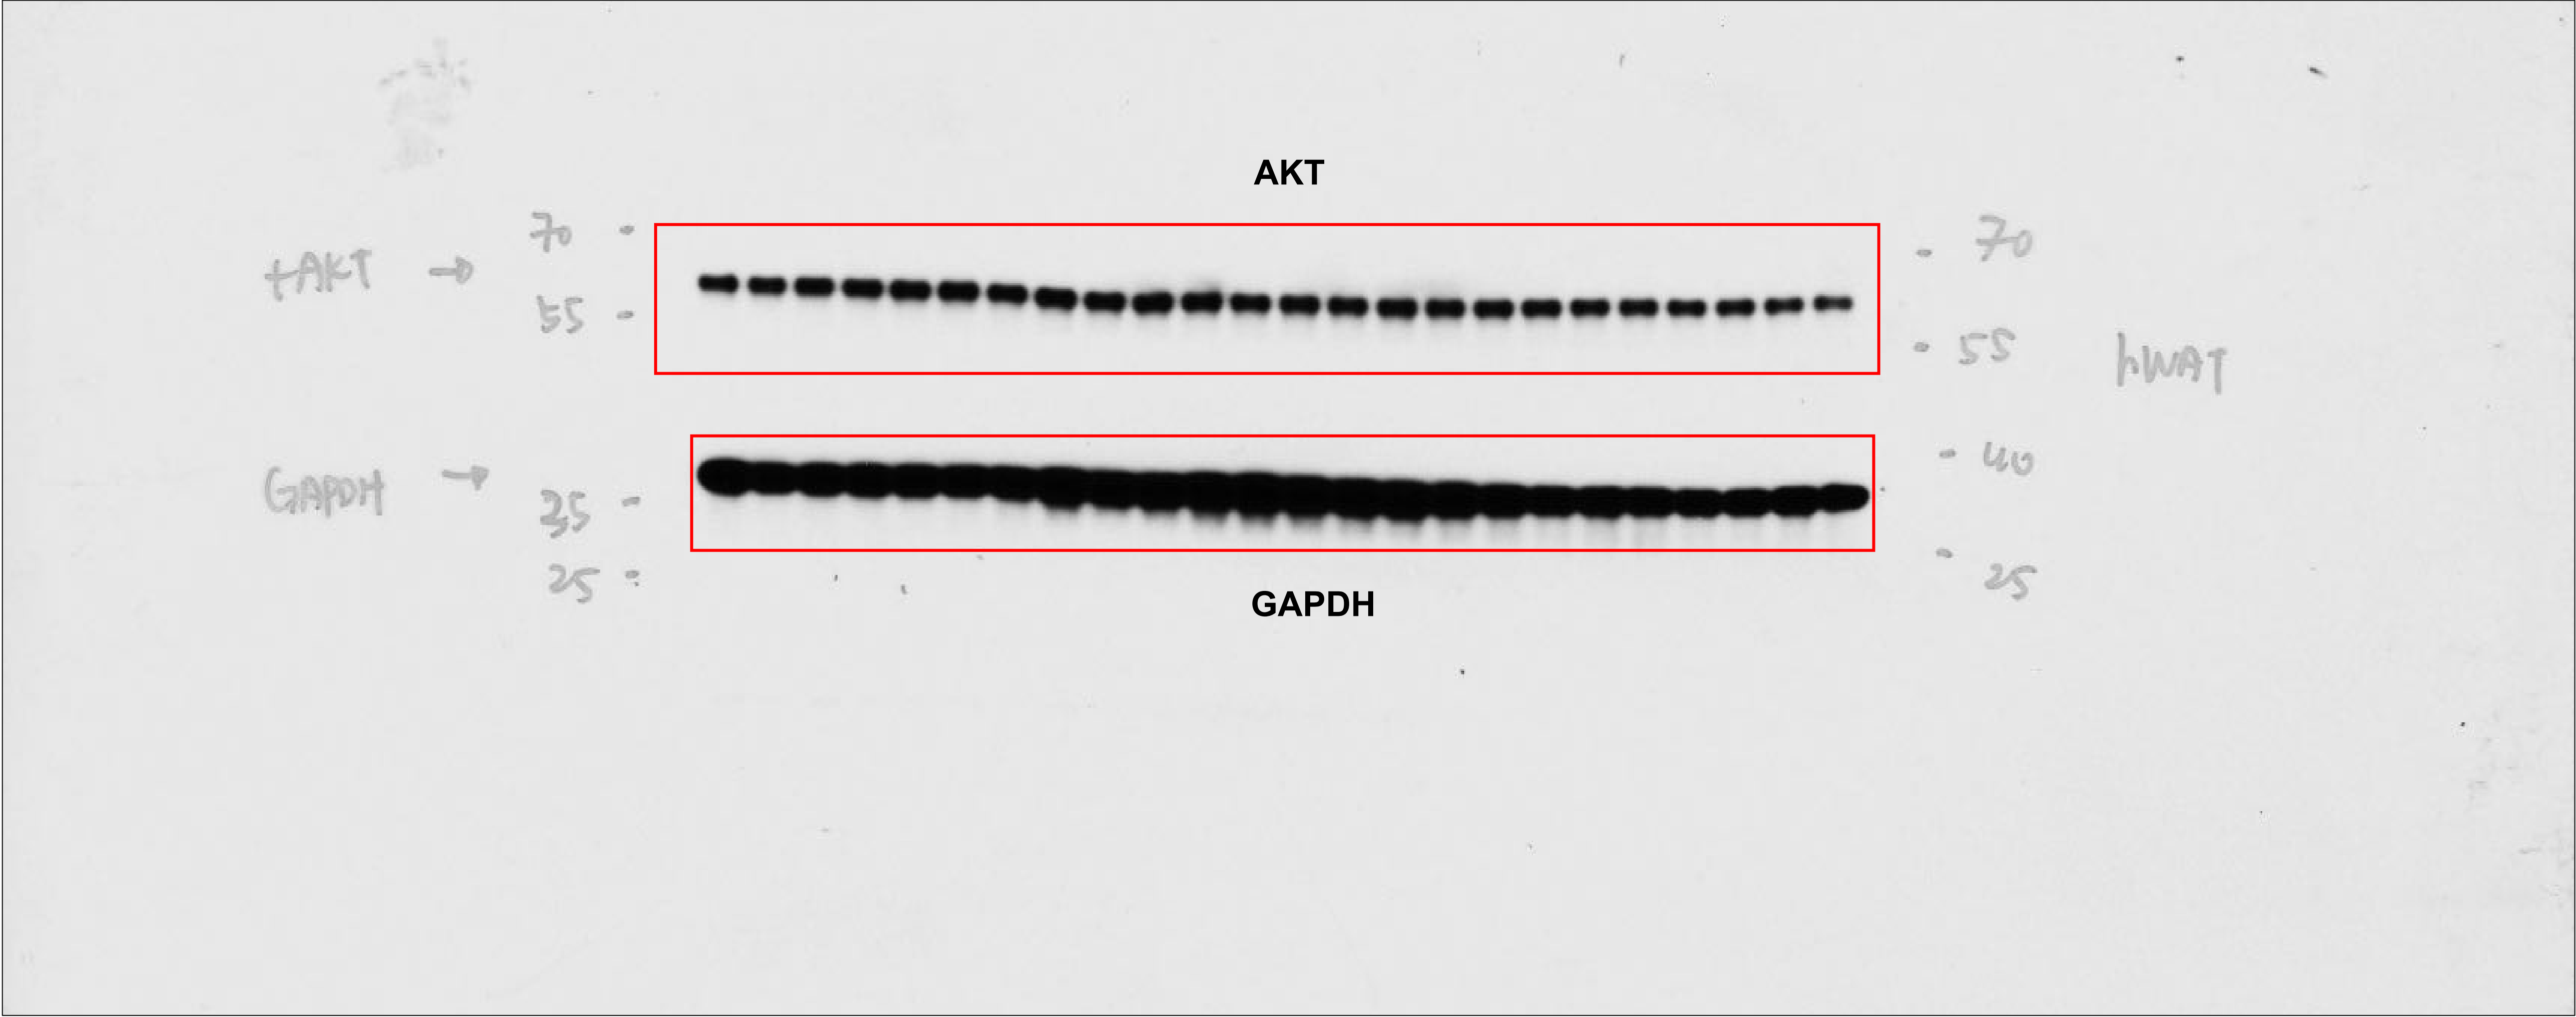



Figure 7e

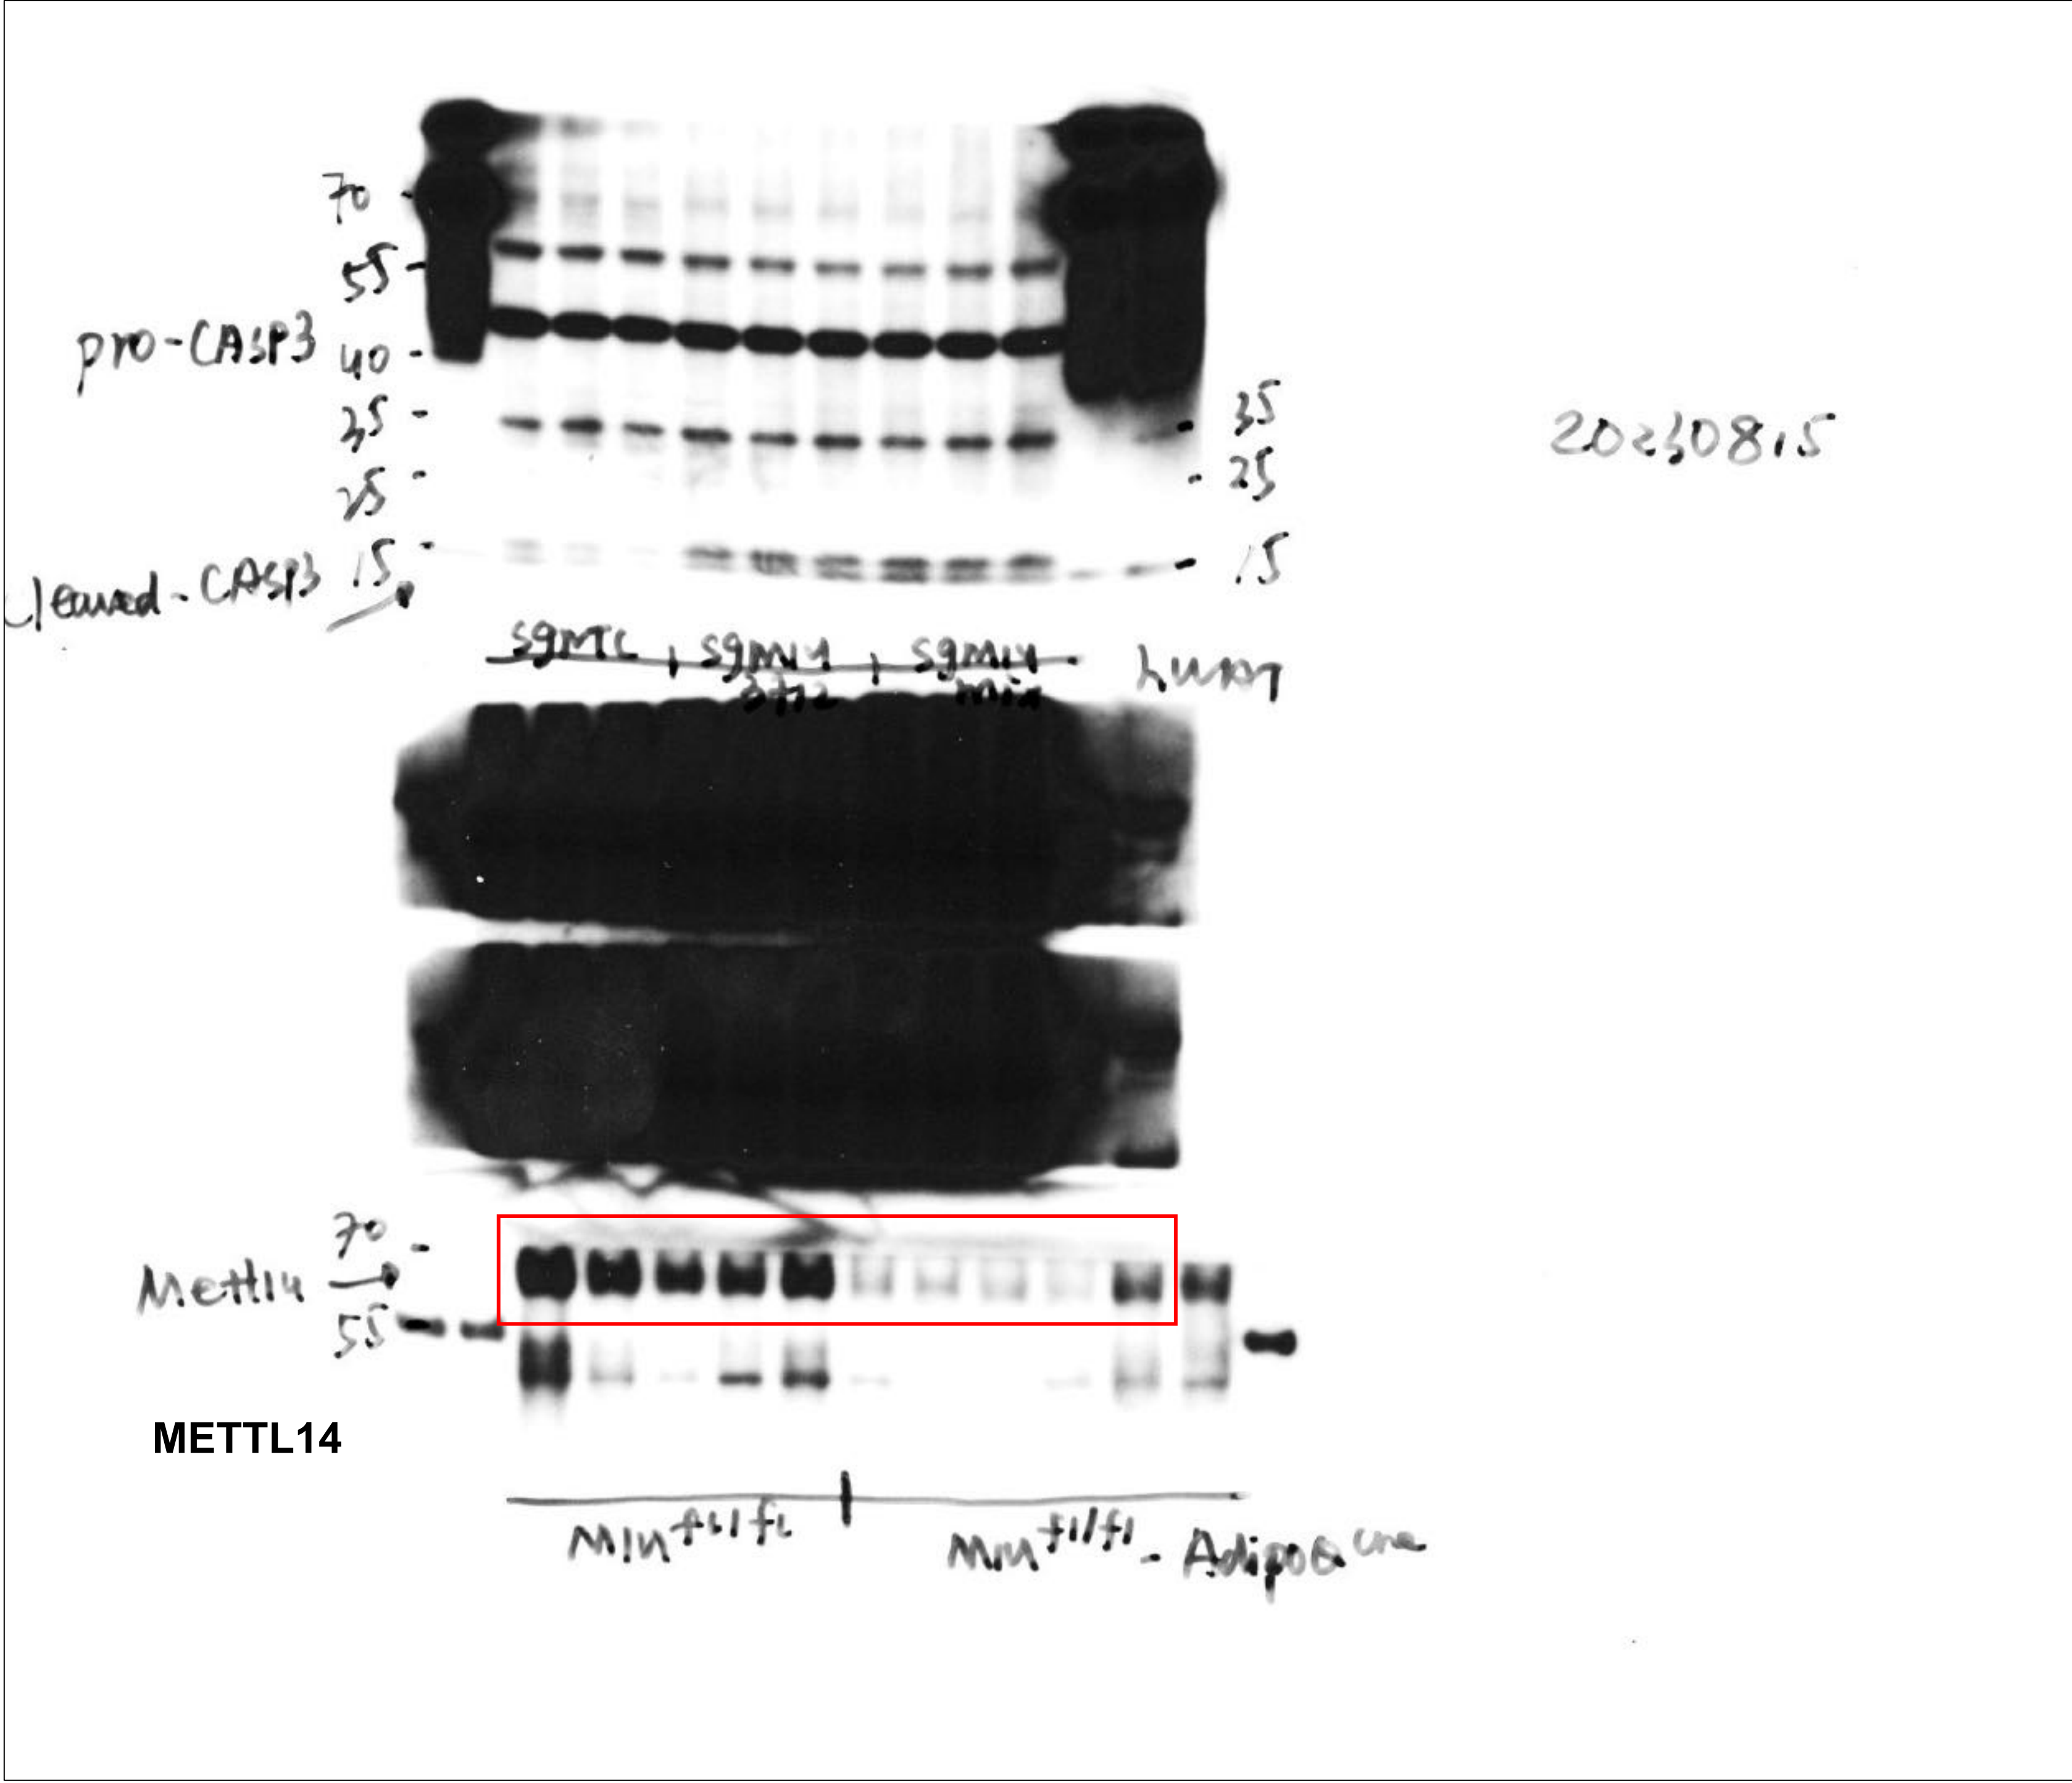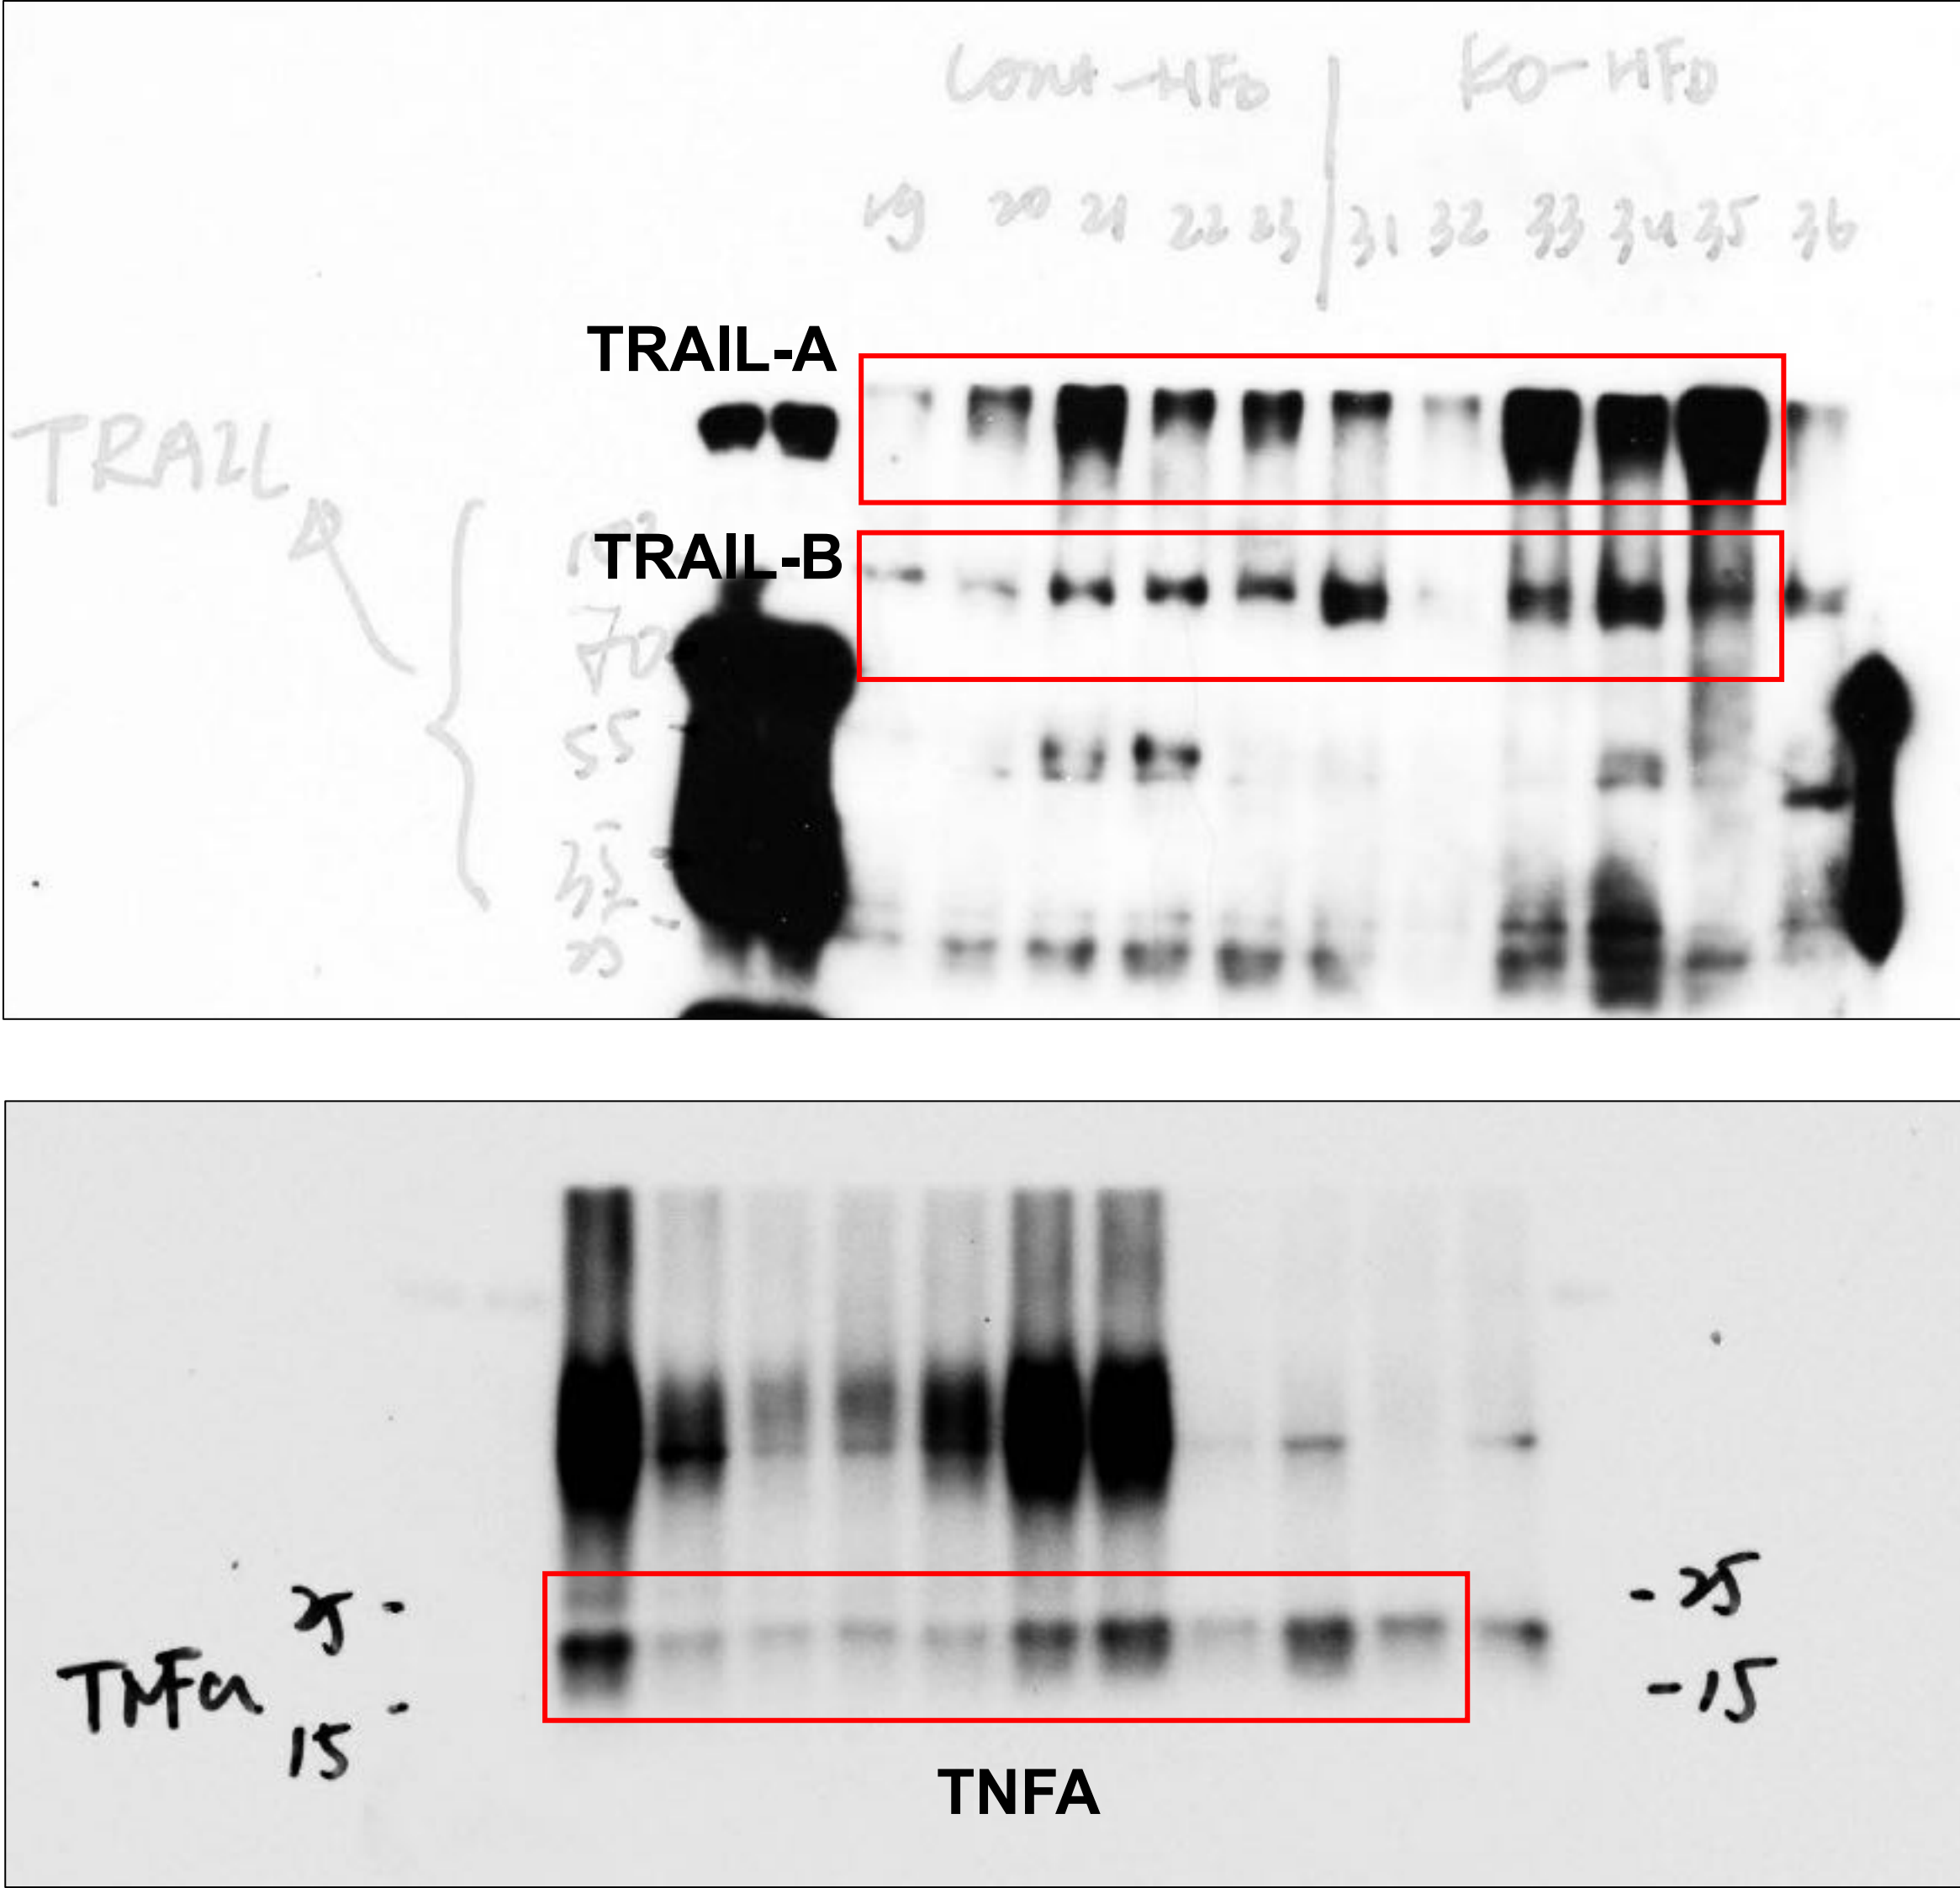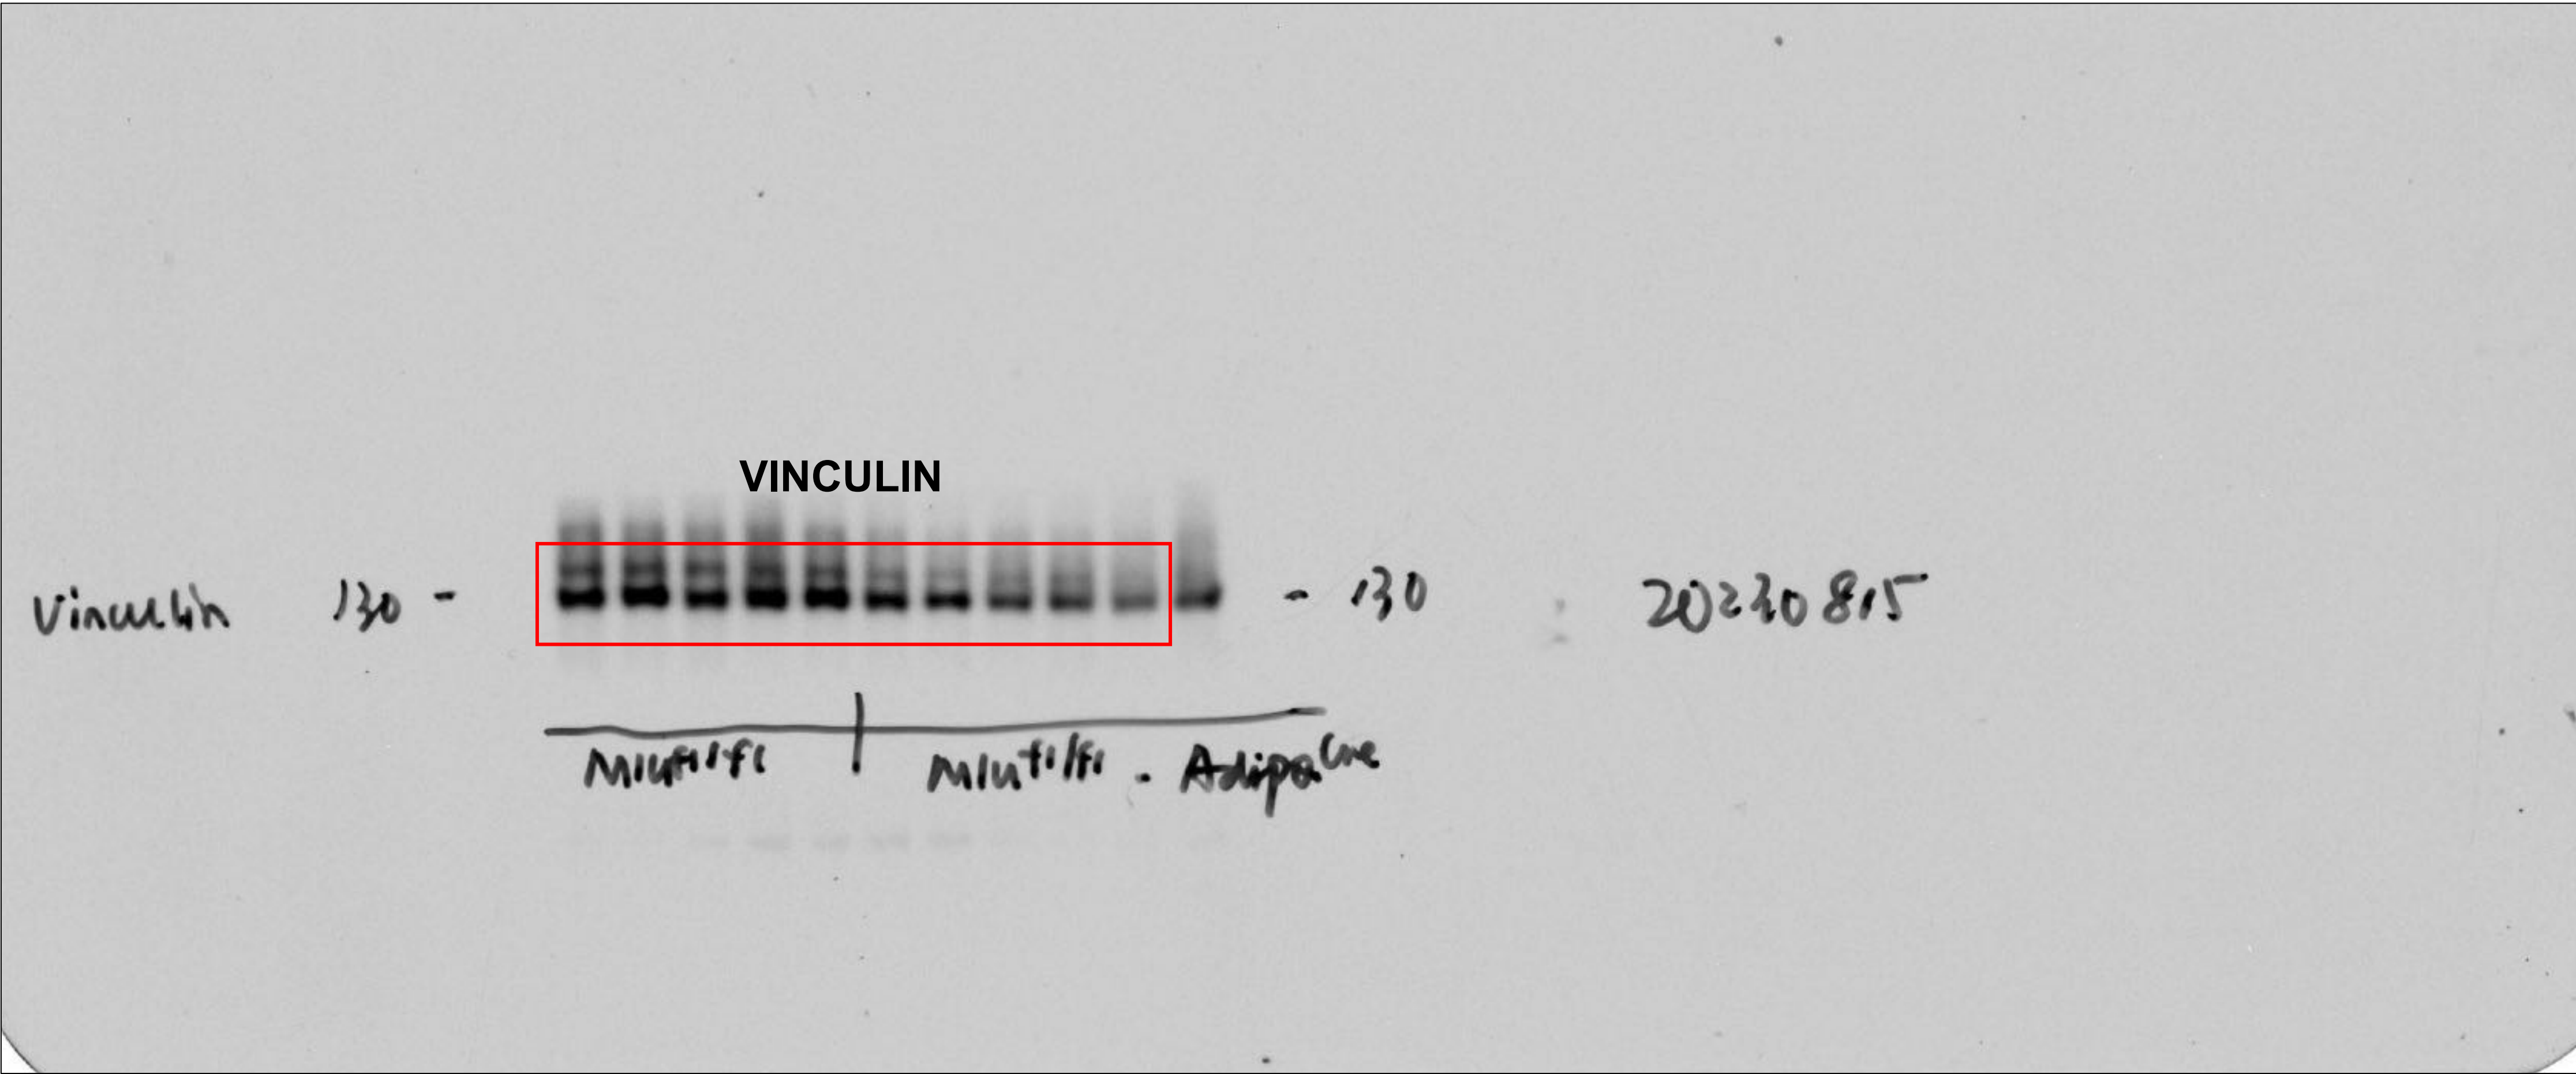



Figure 7k

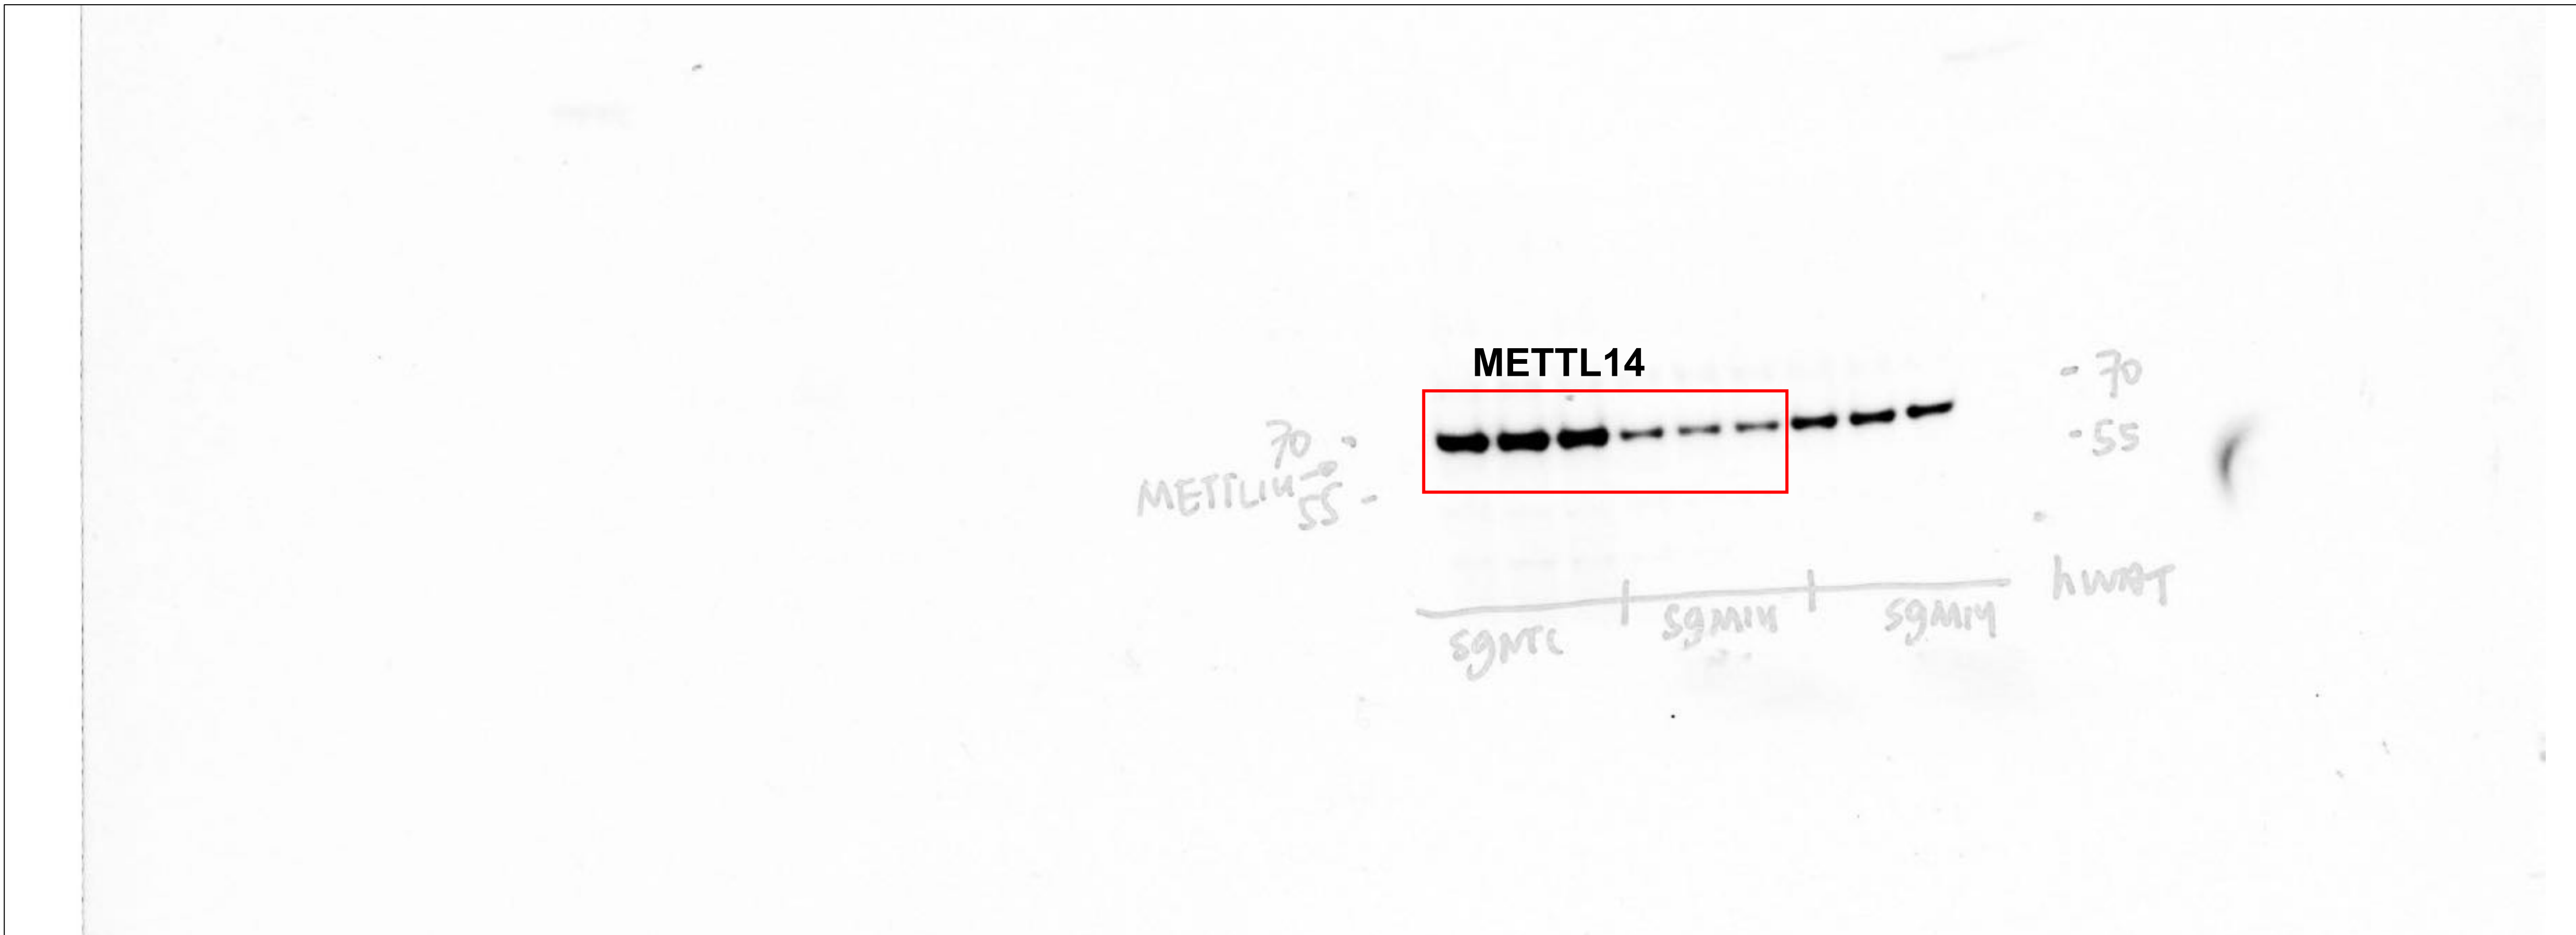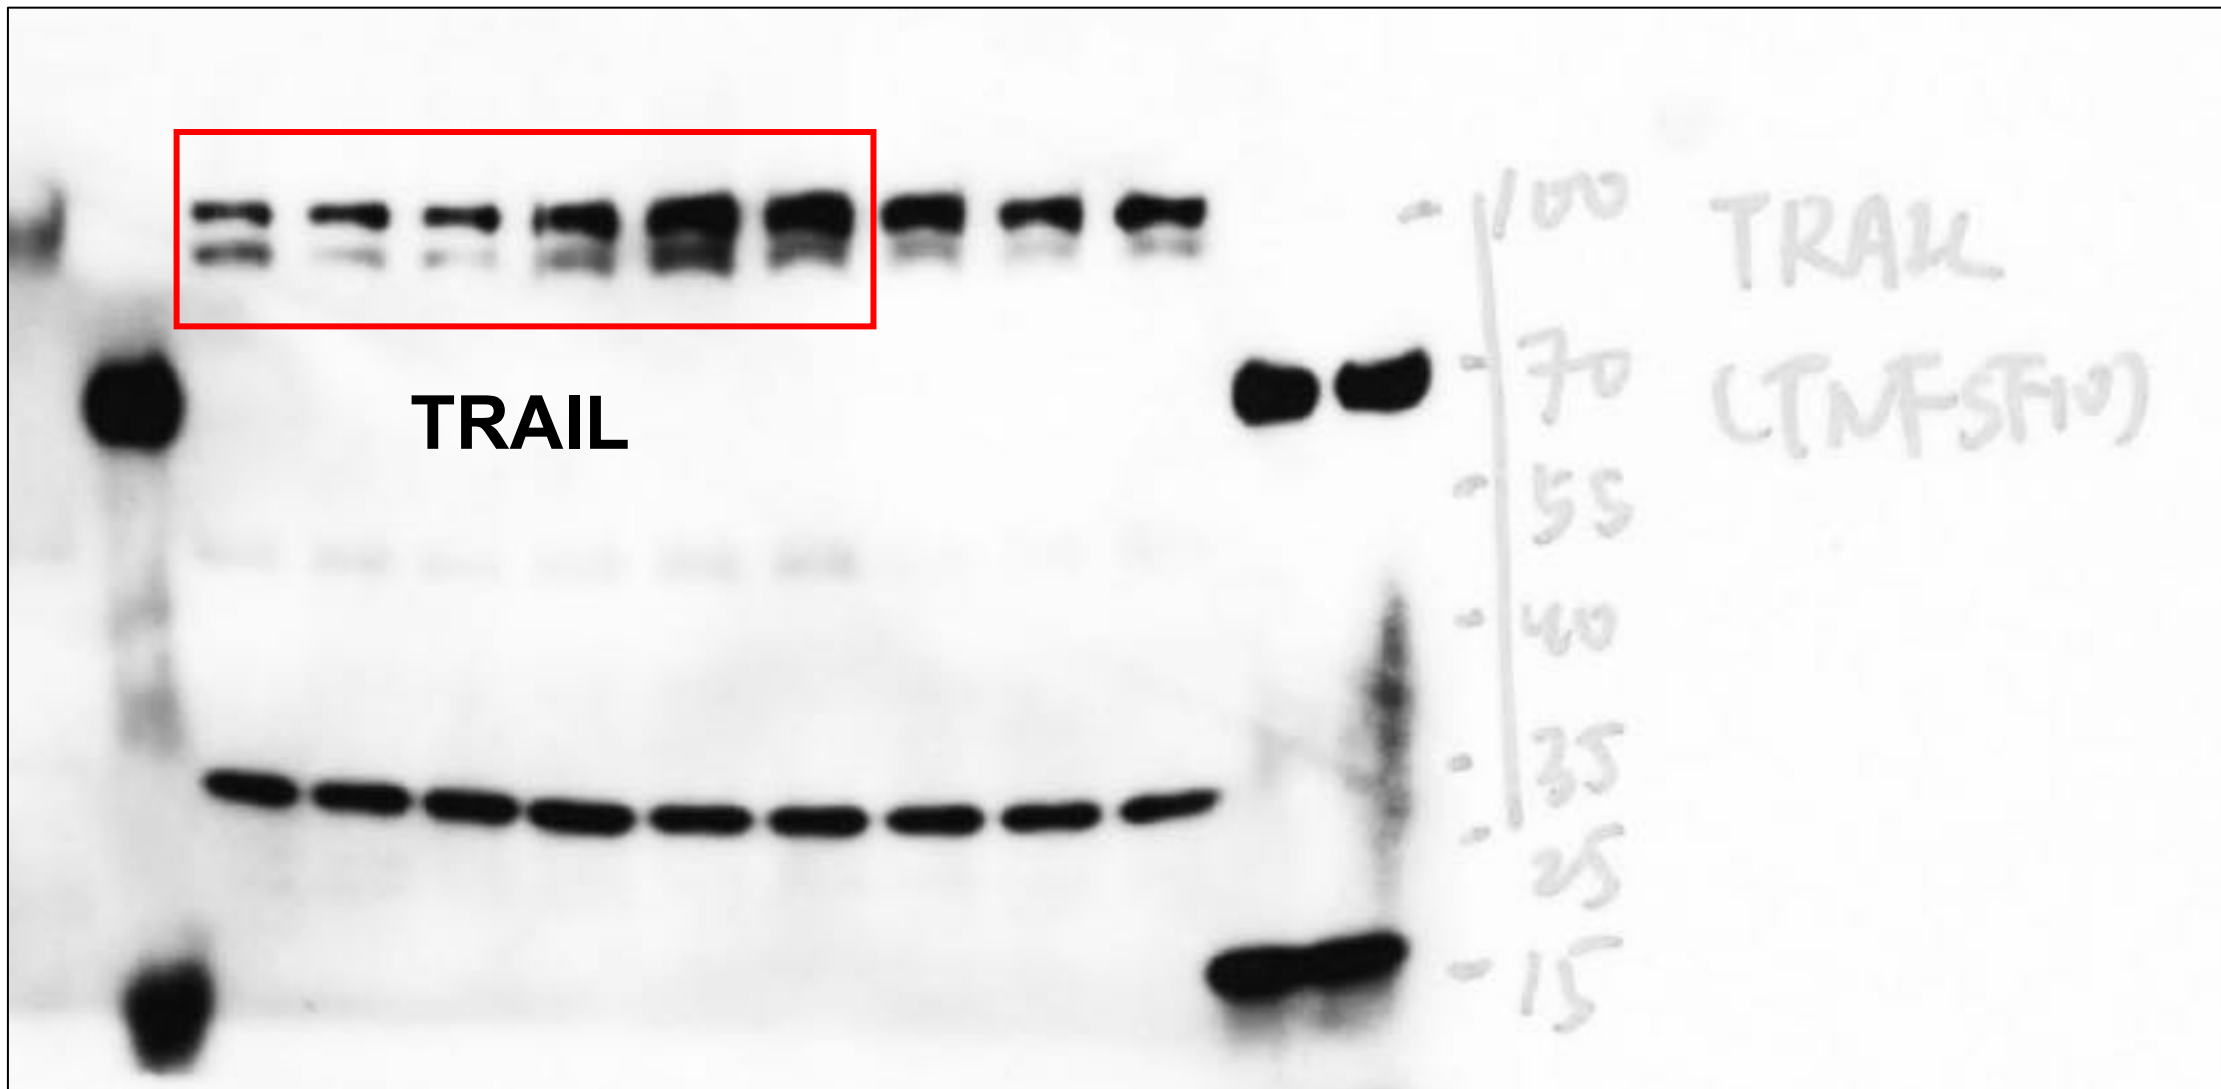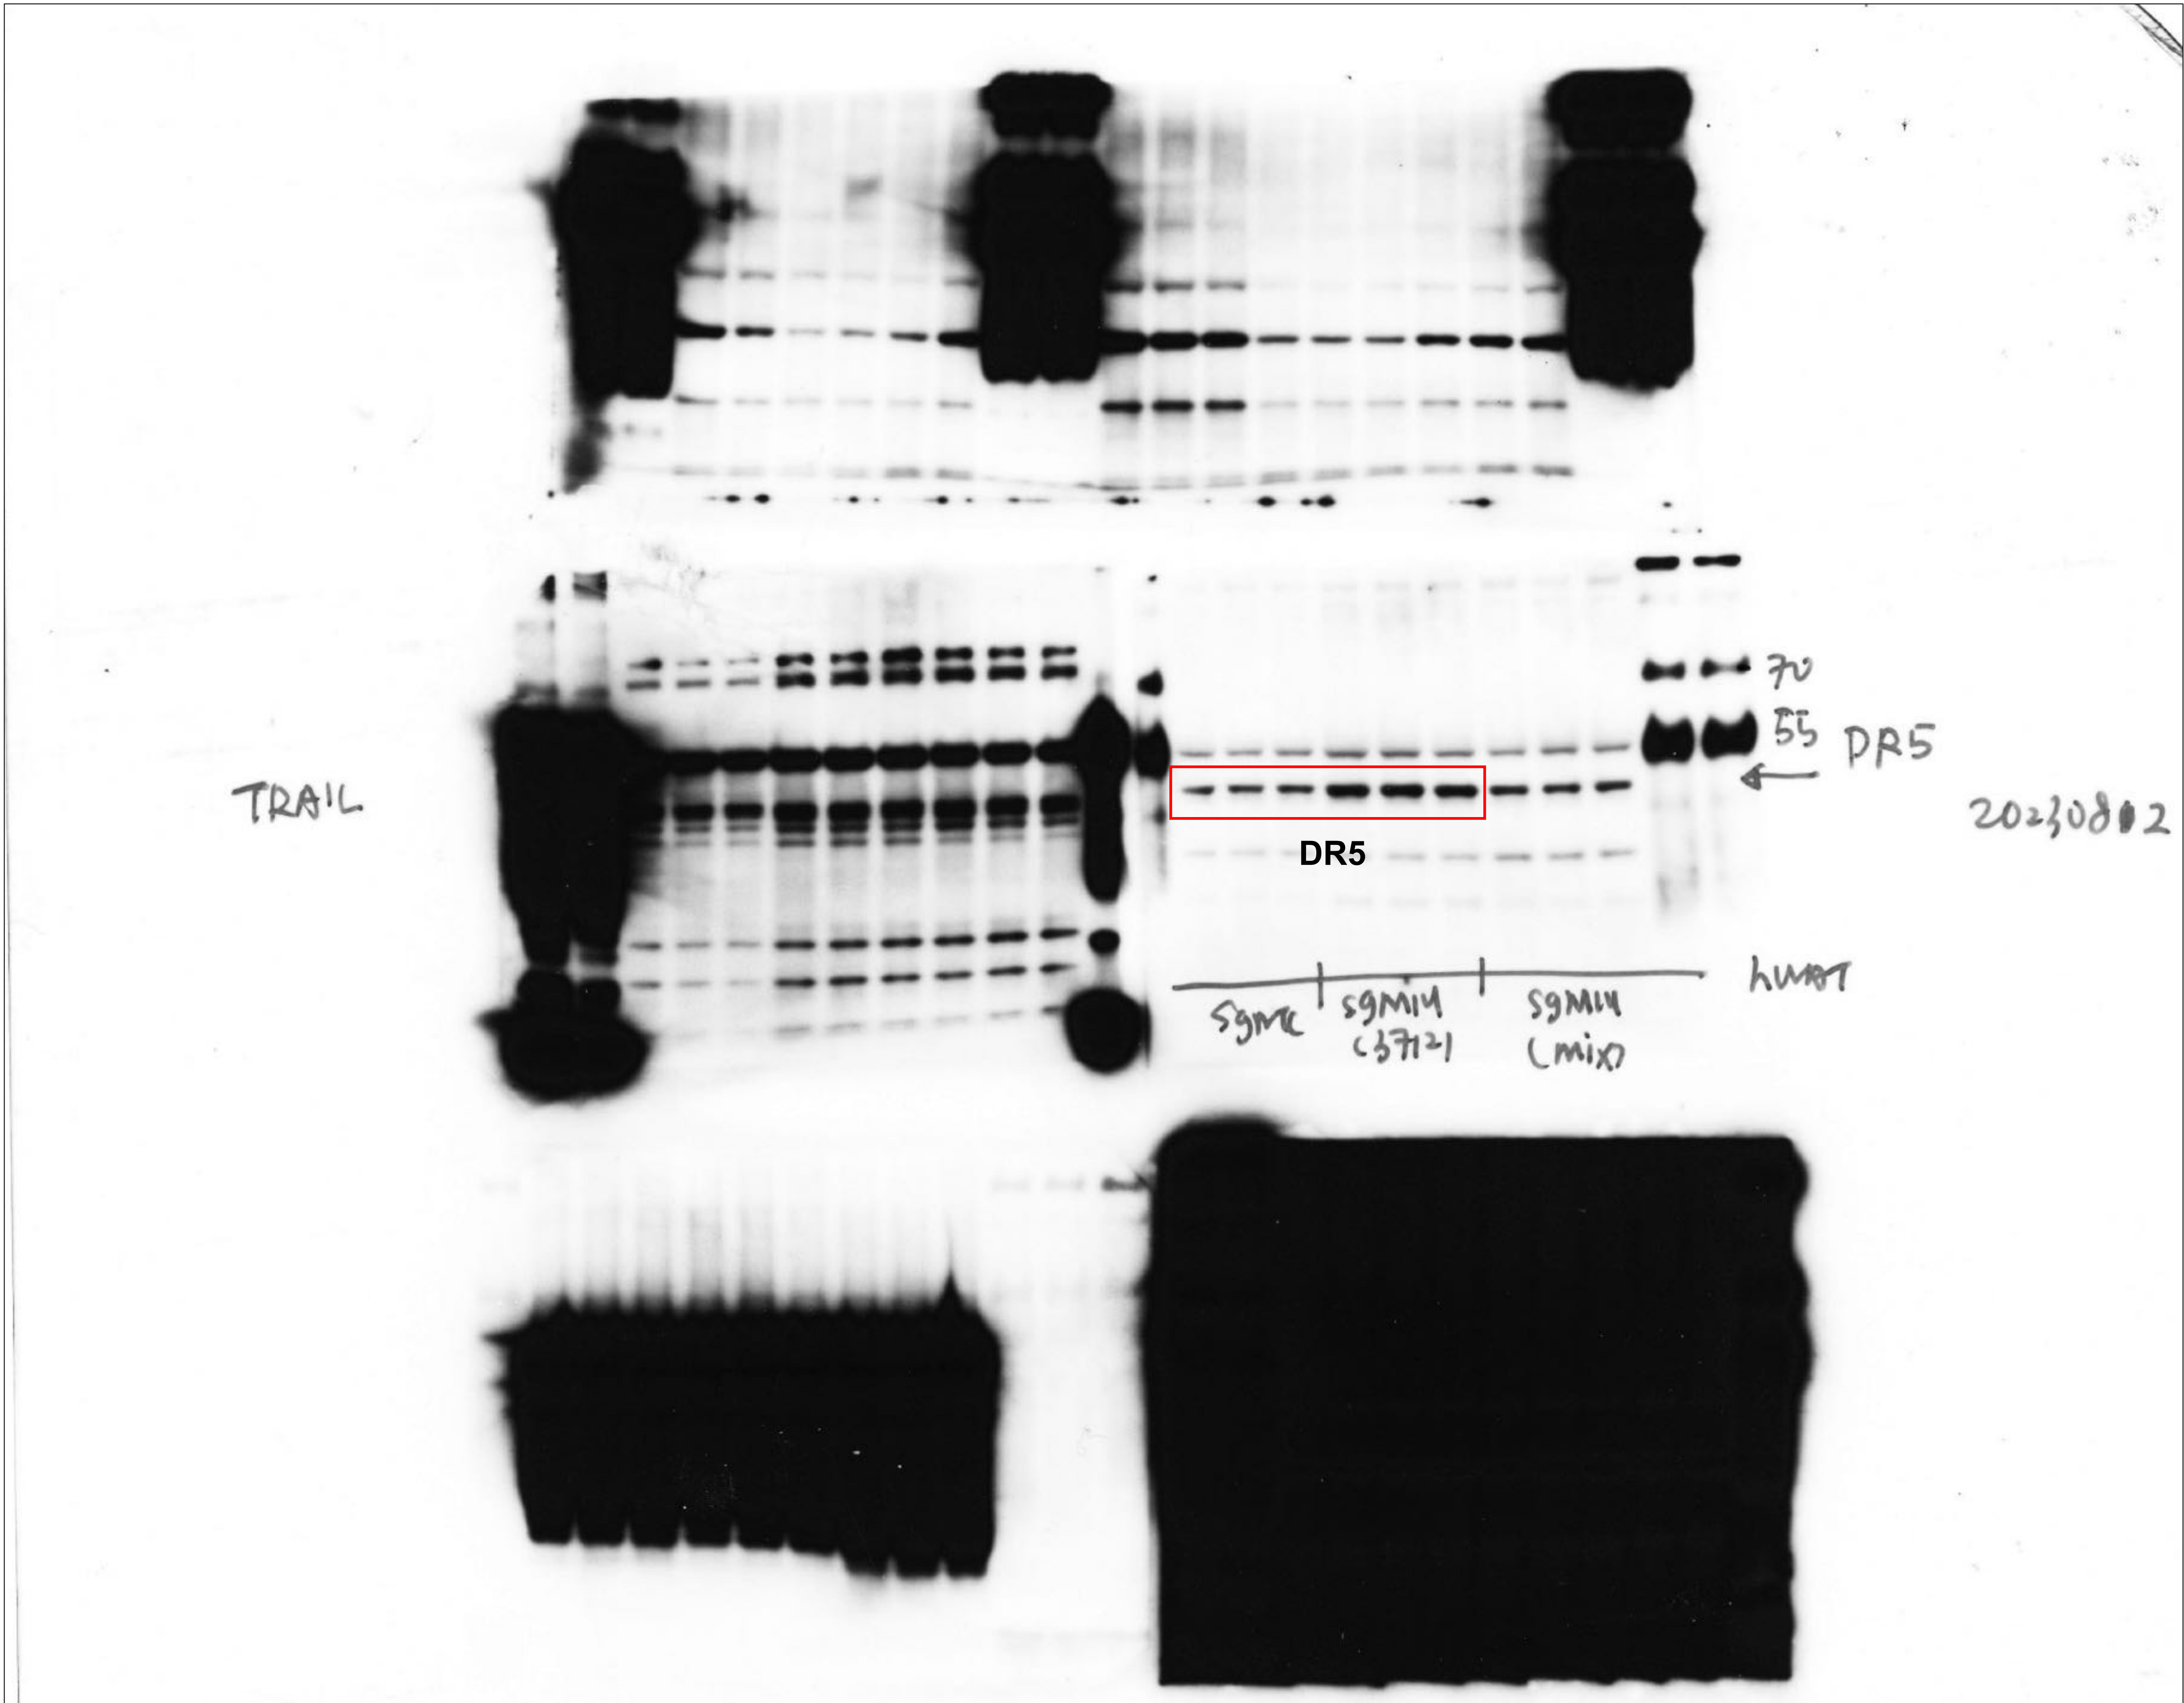



Figure 7k

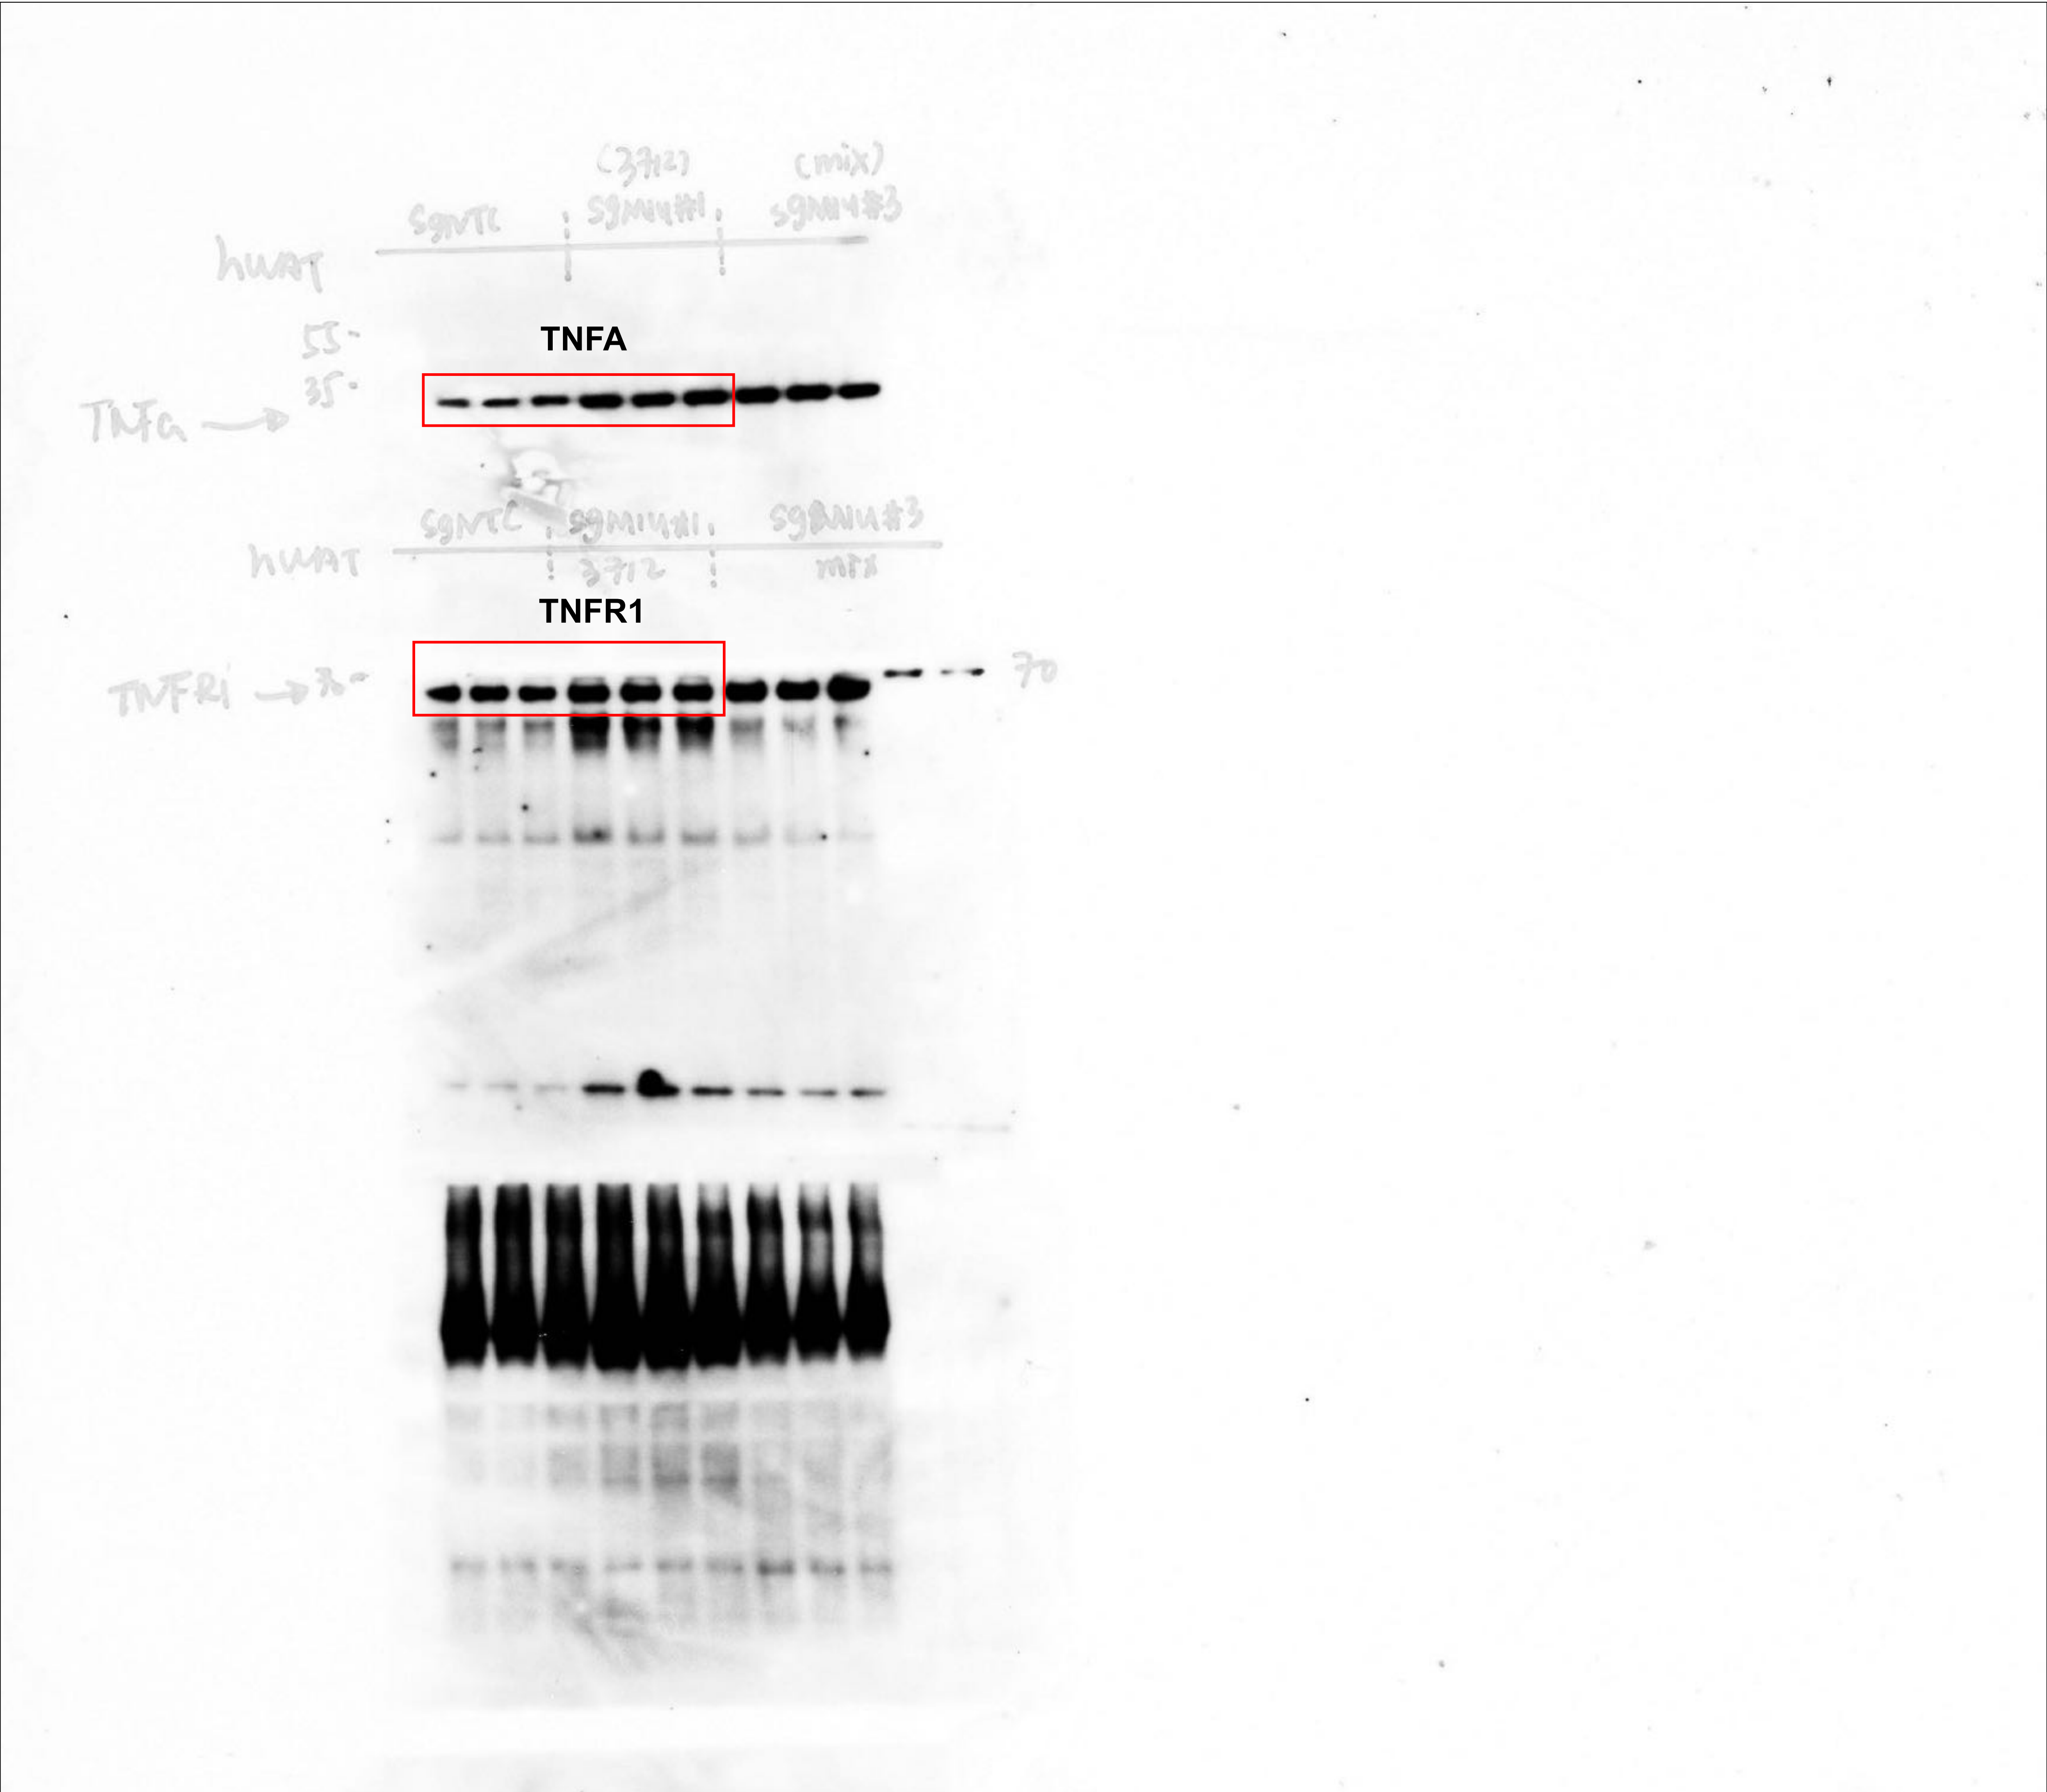



Figure 7k

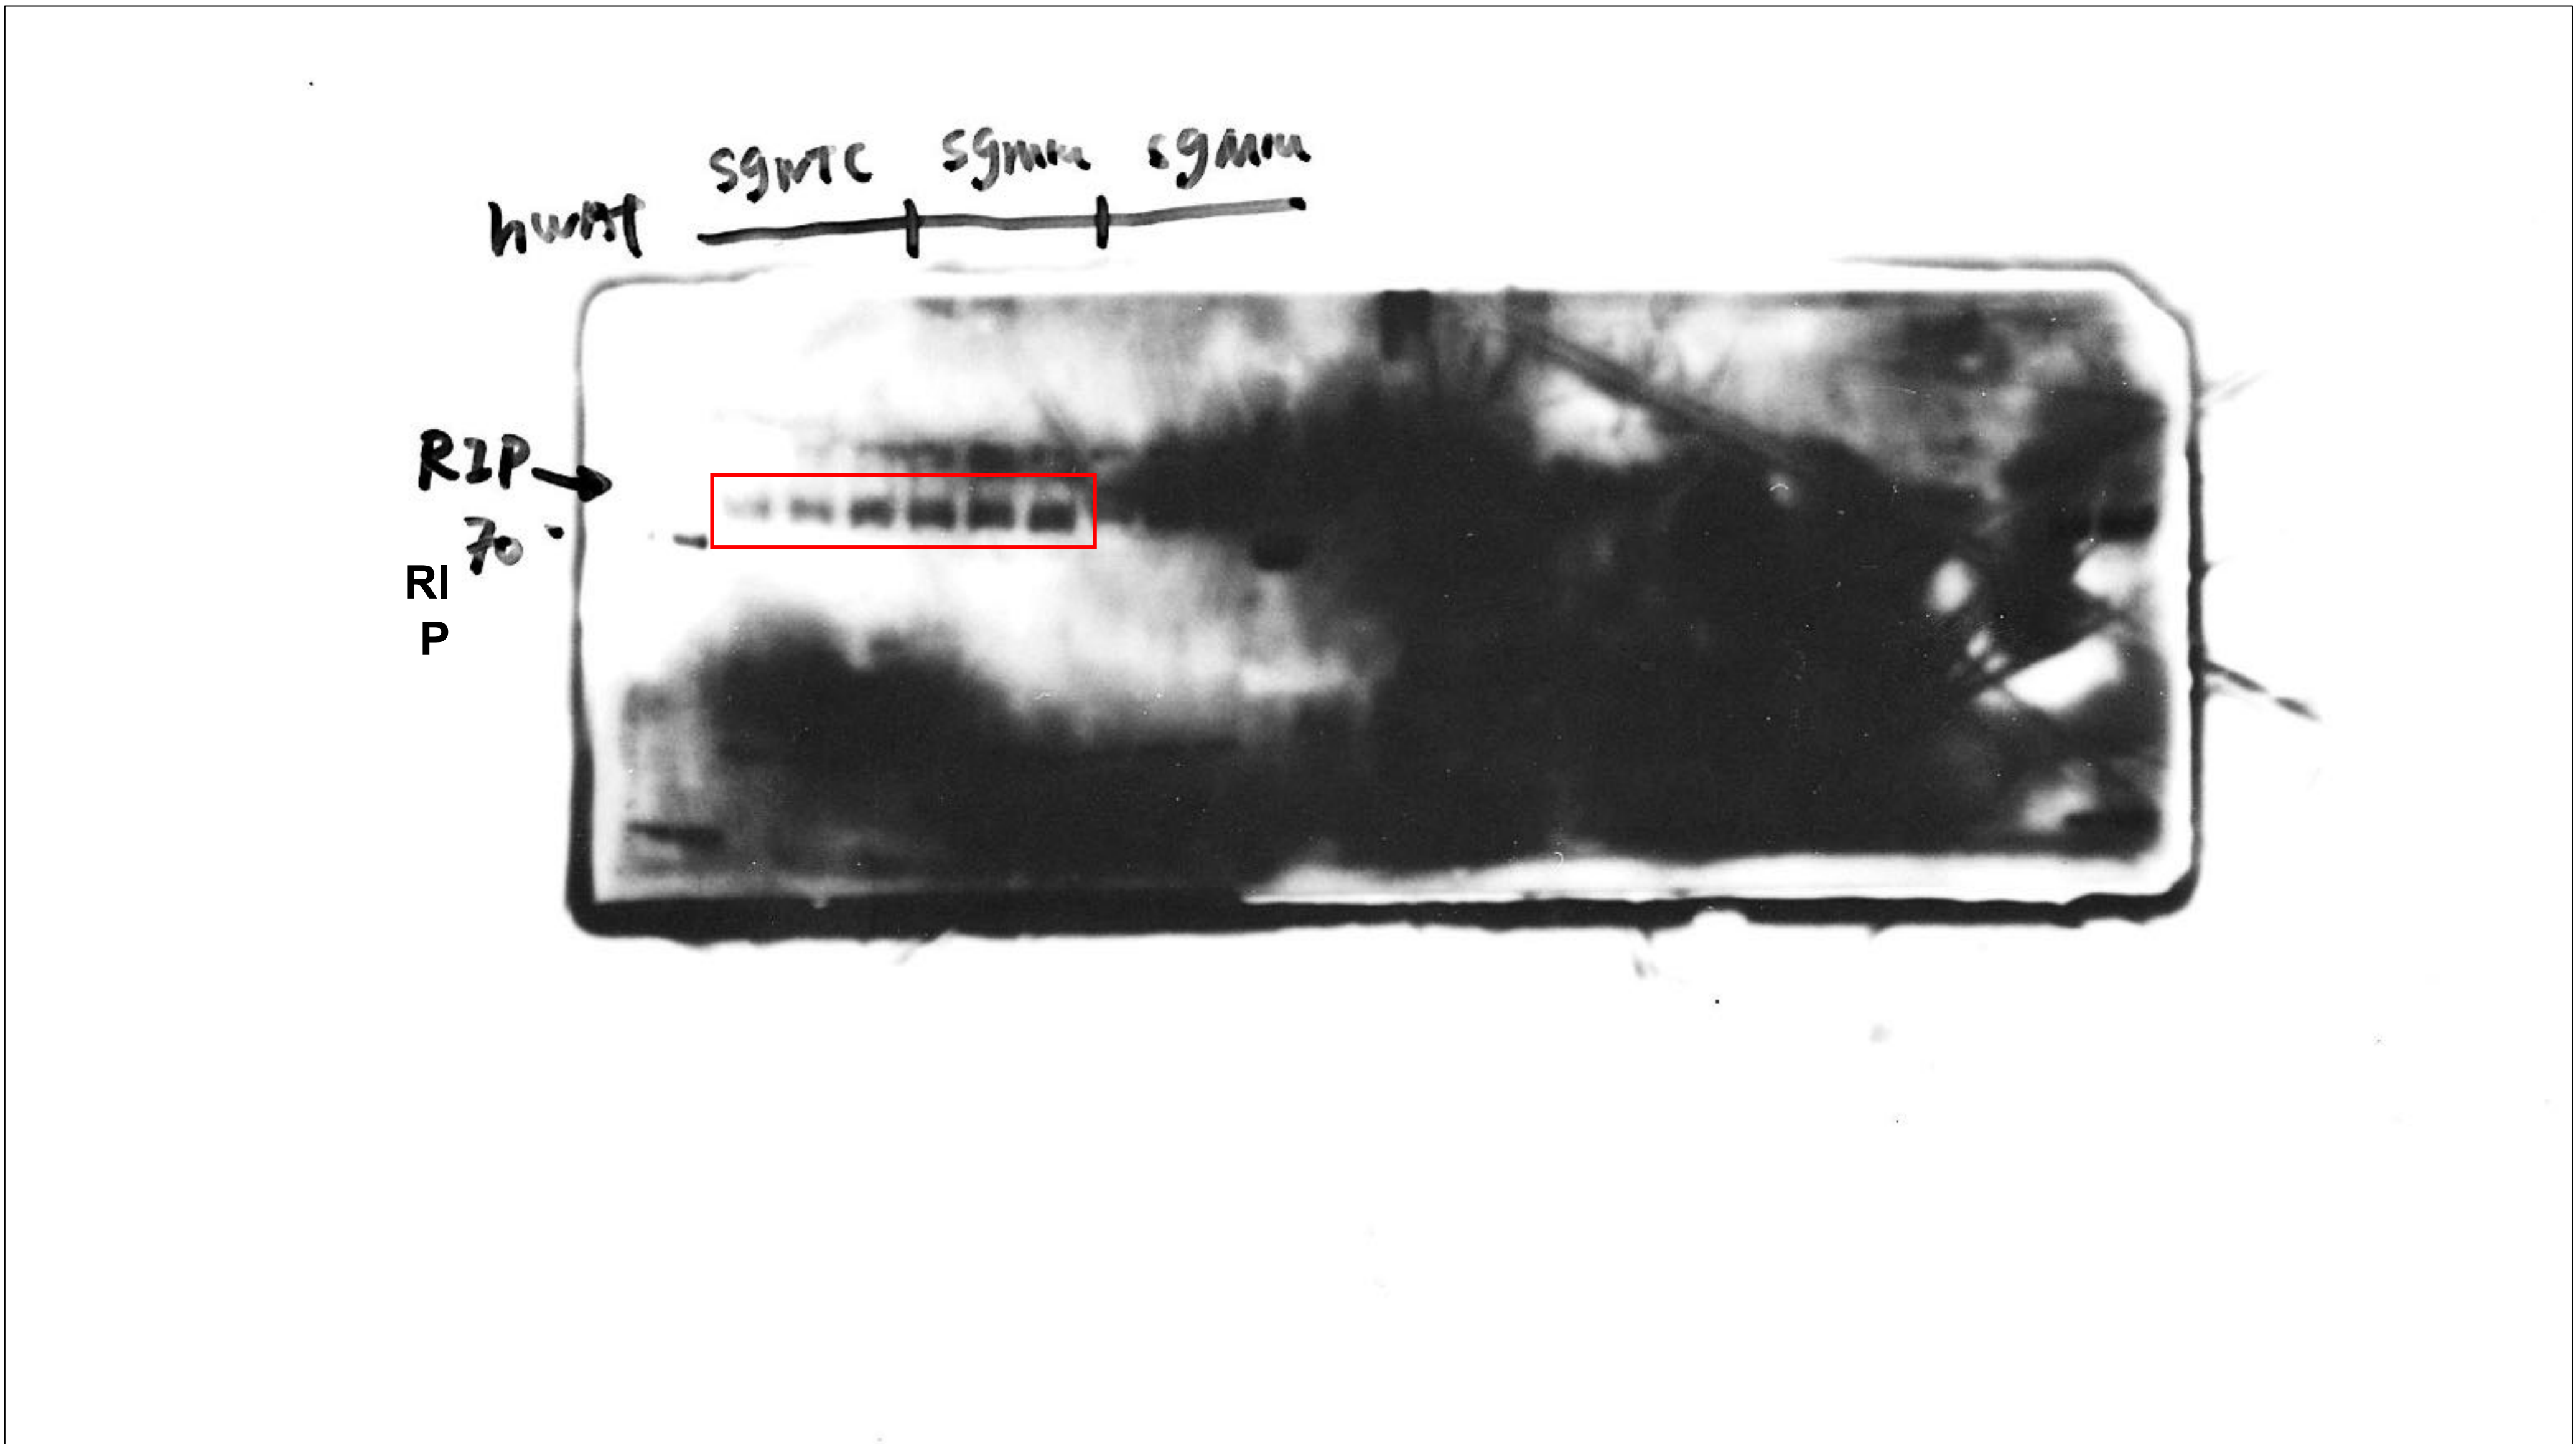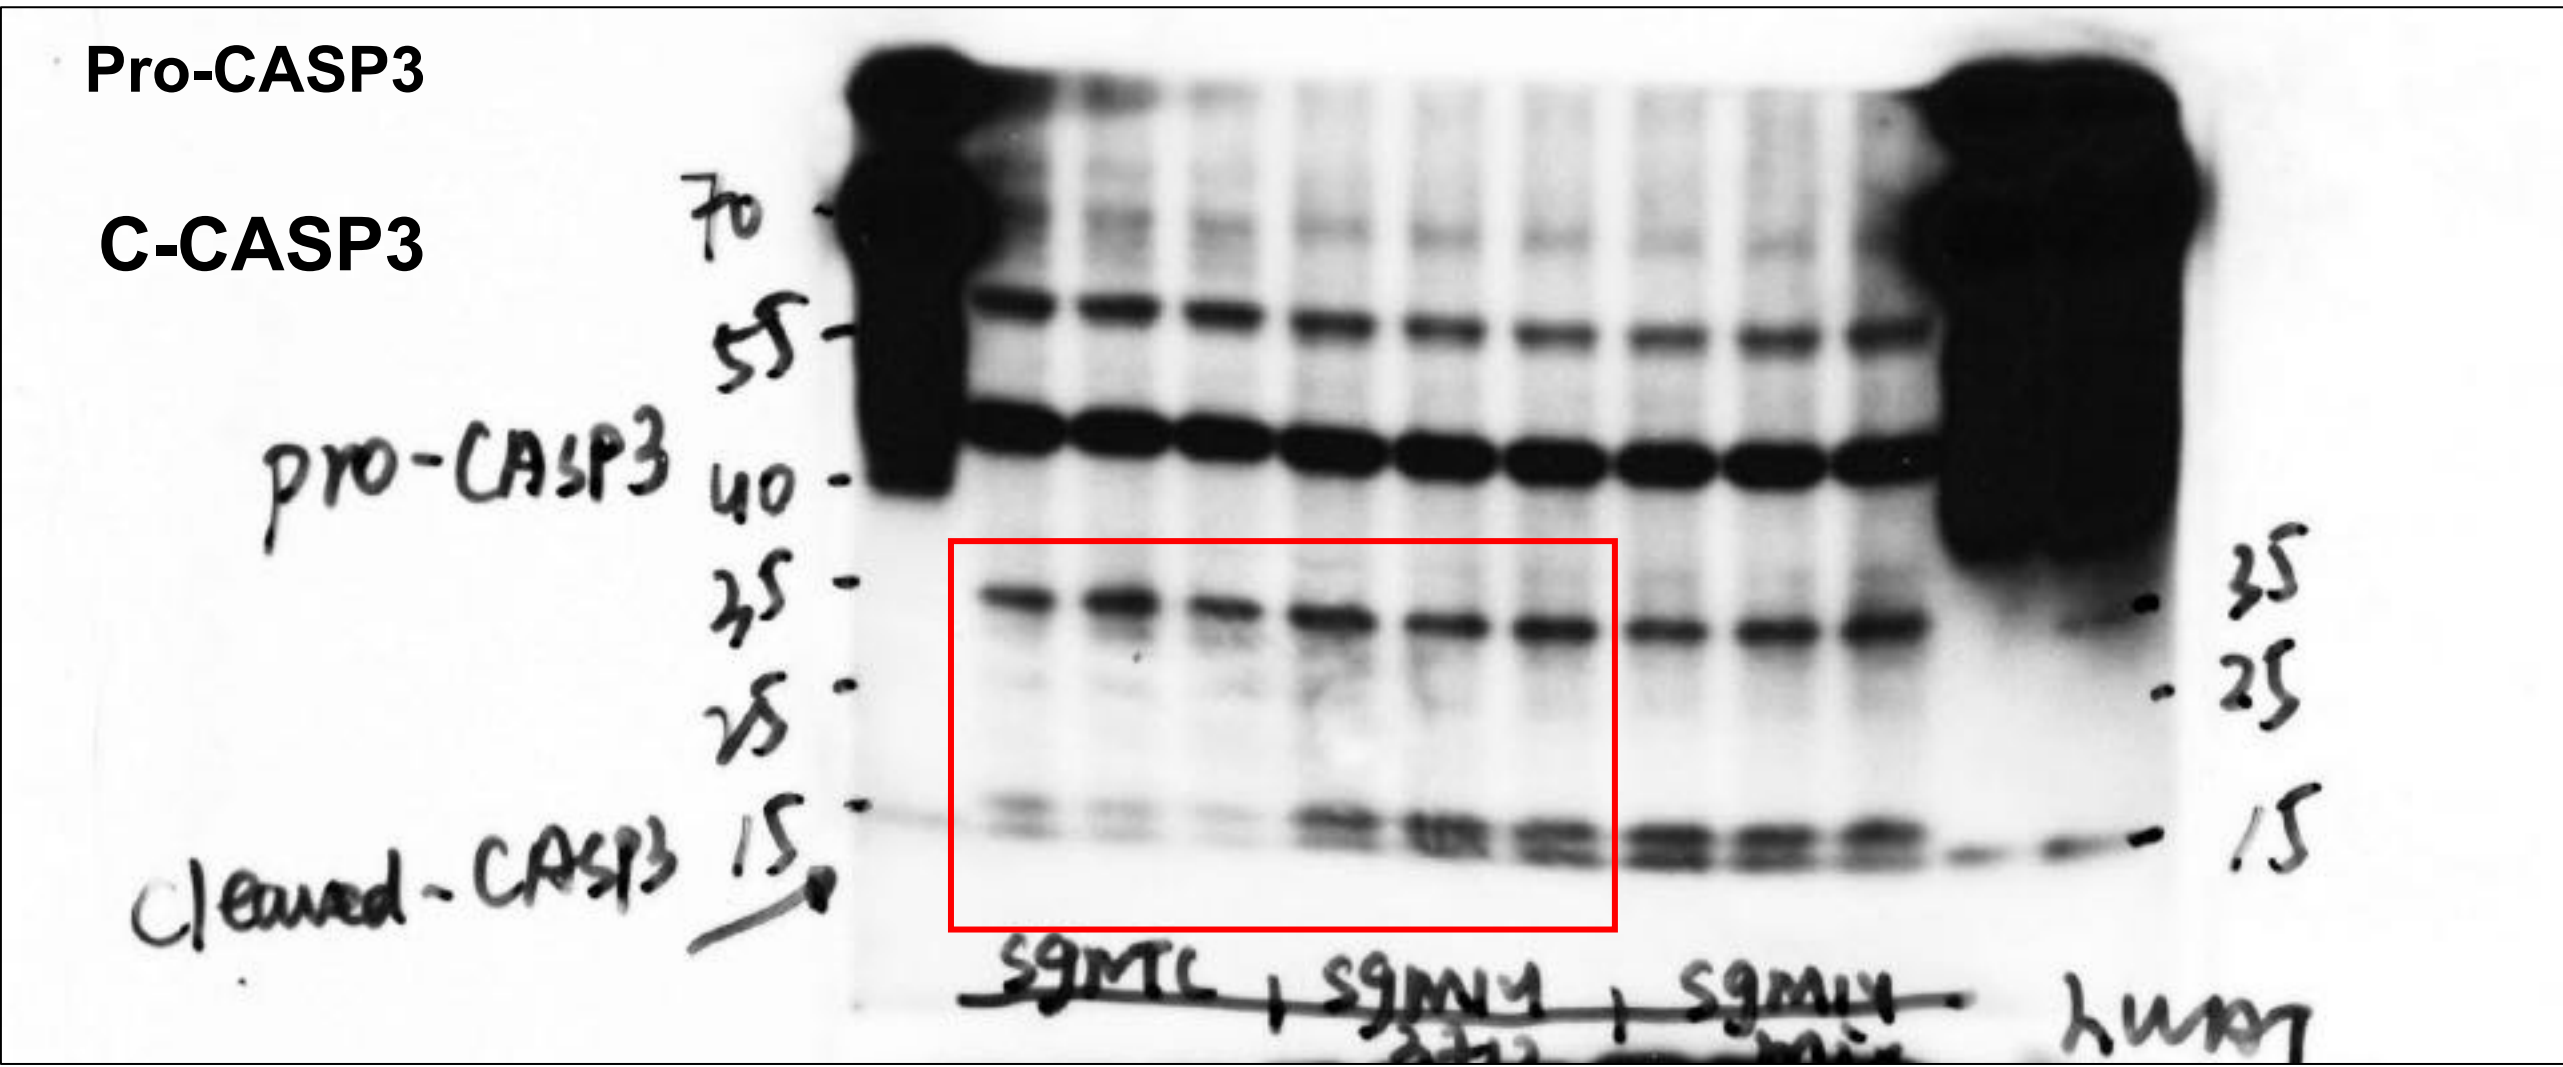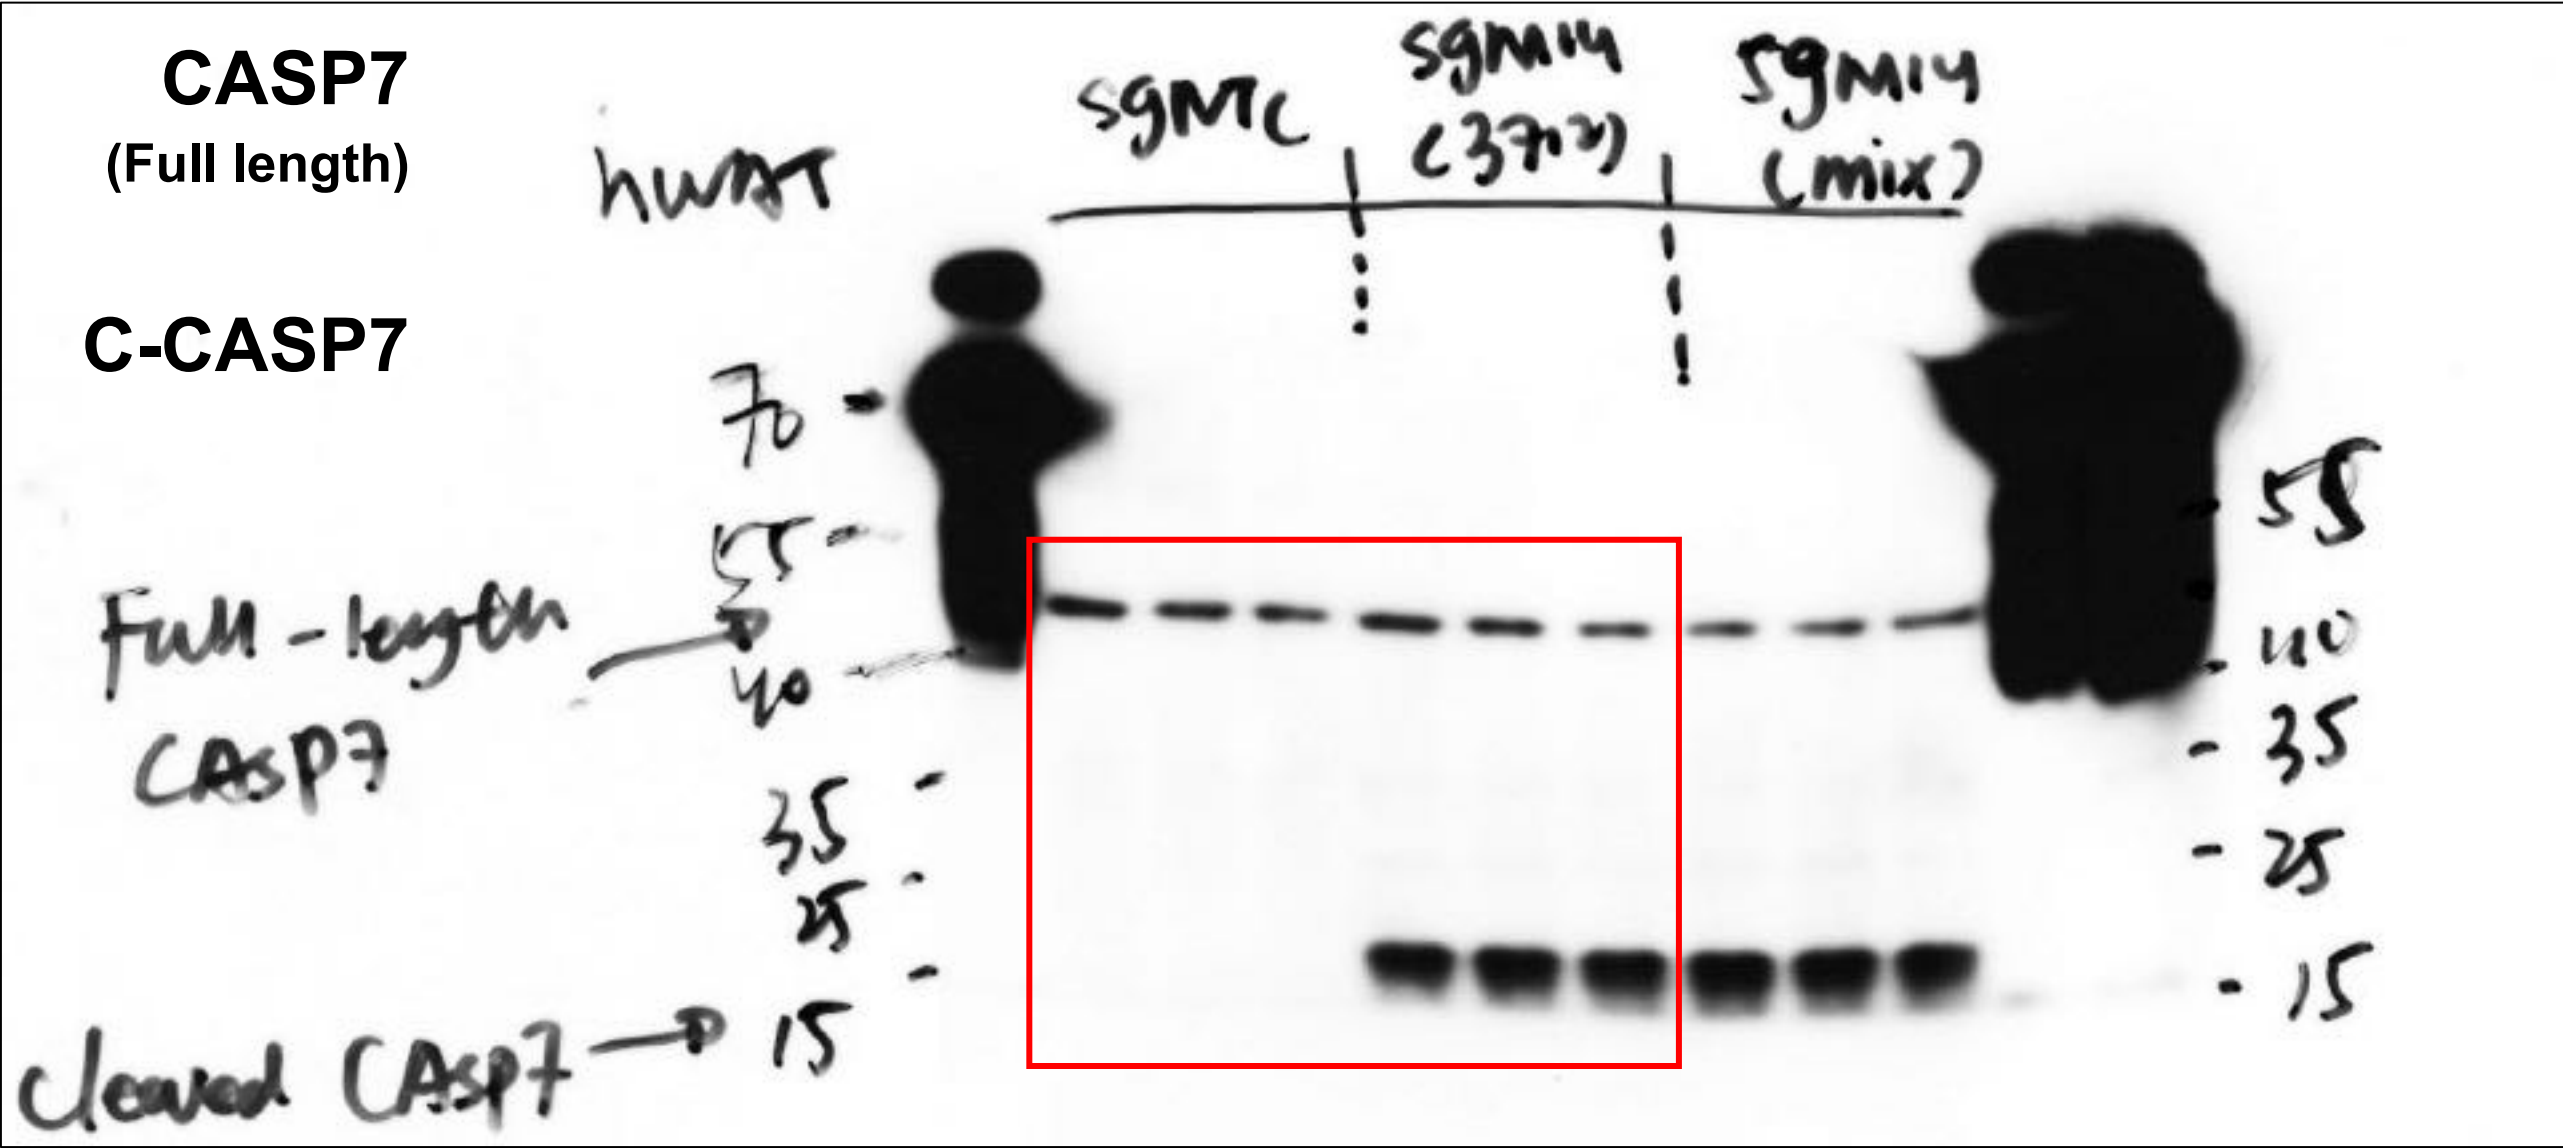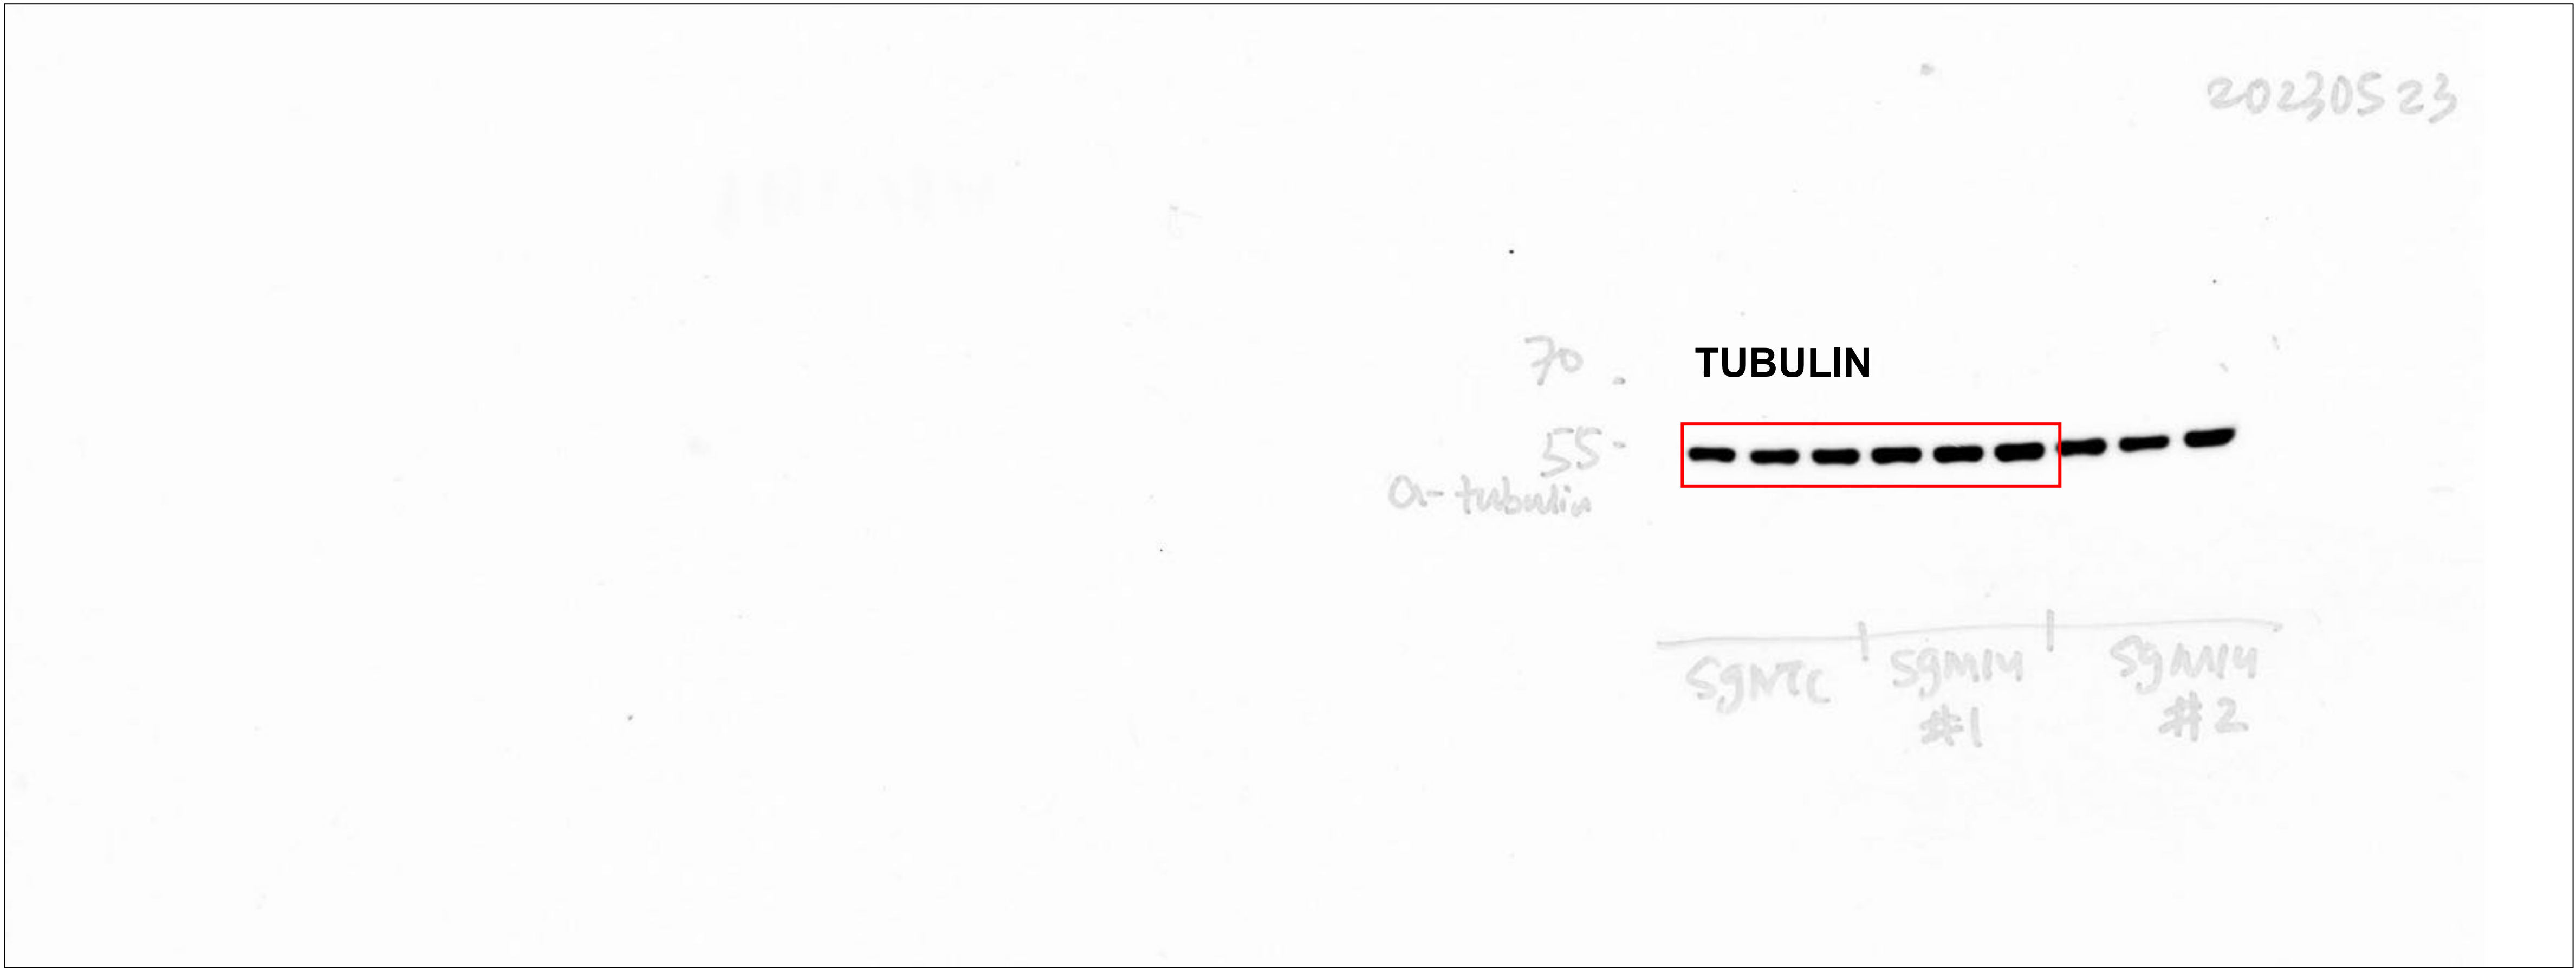



Figure 8b

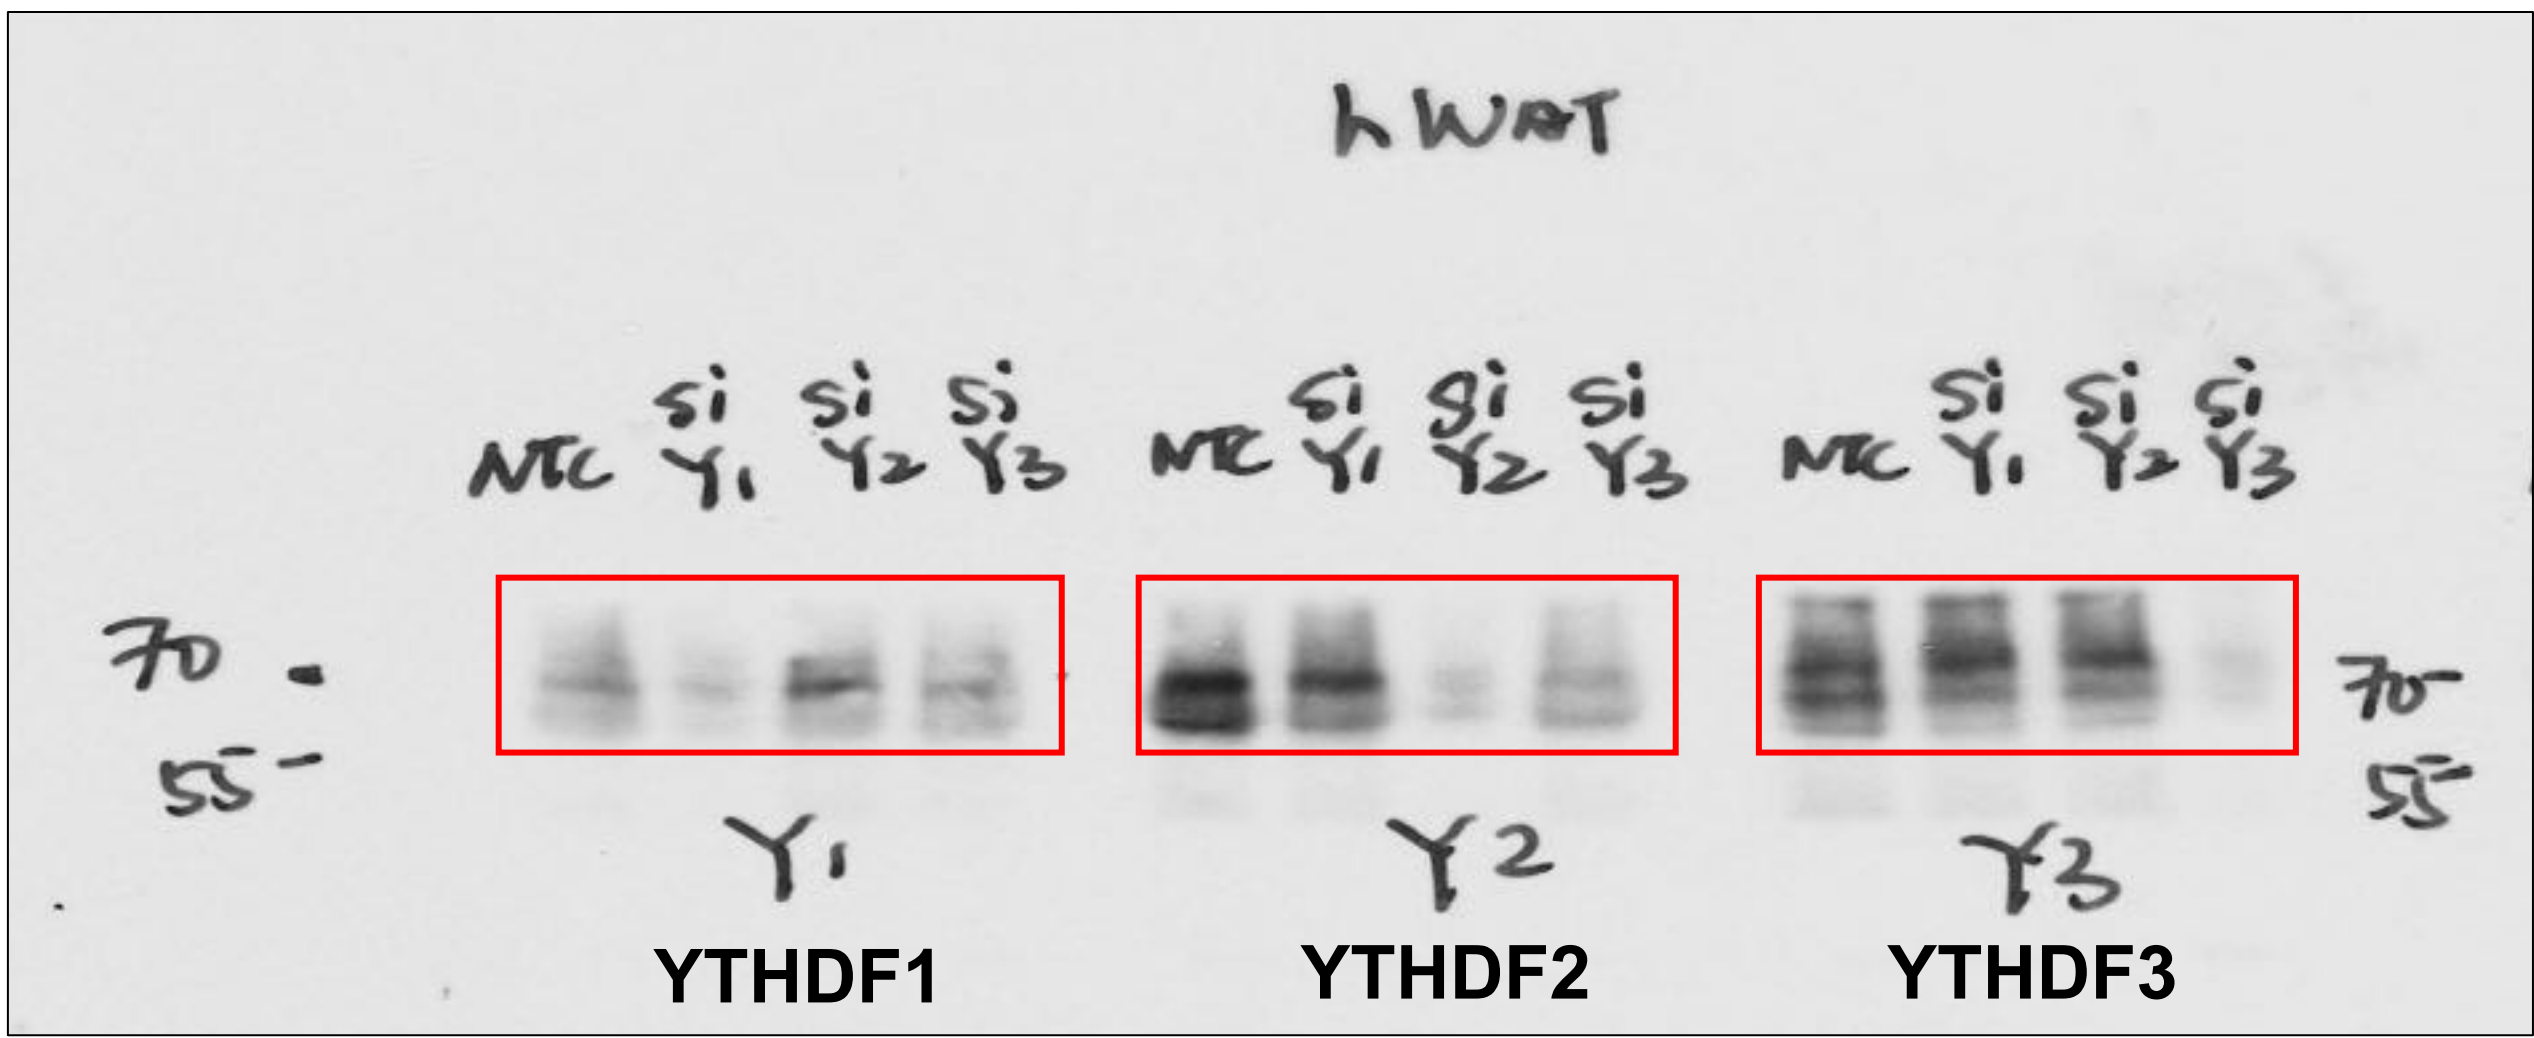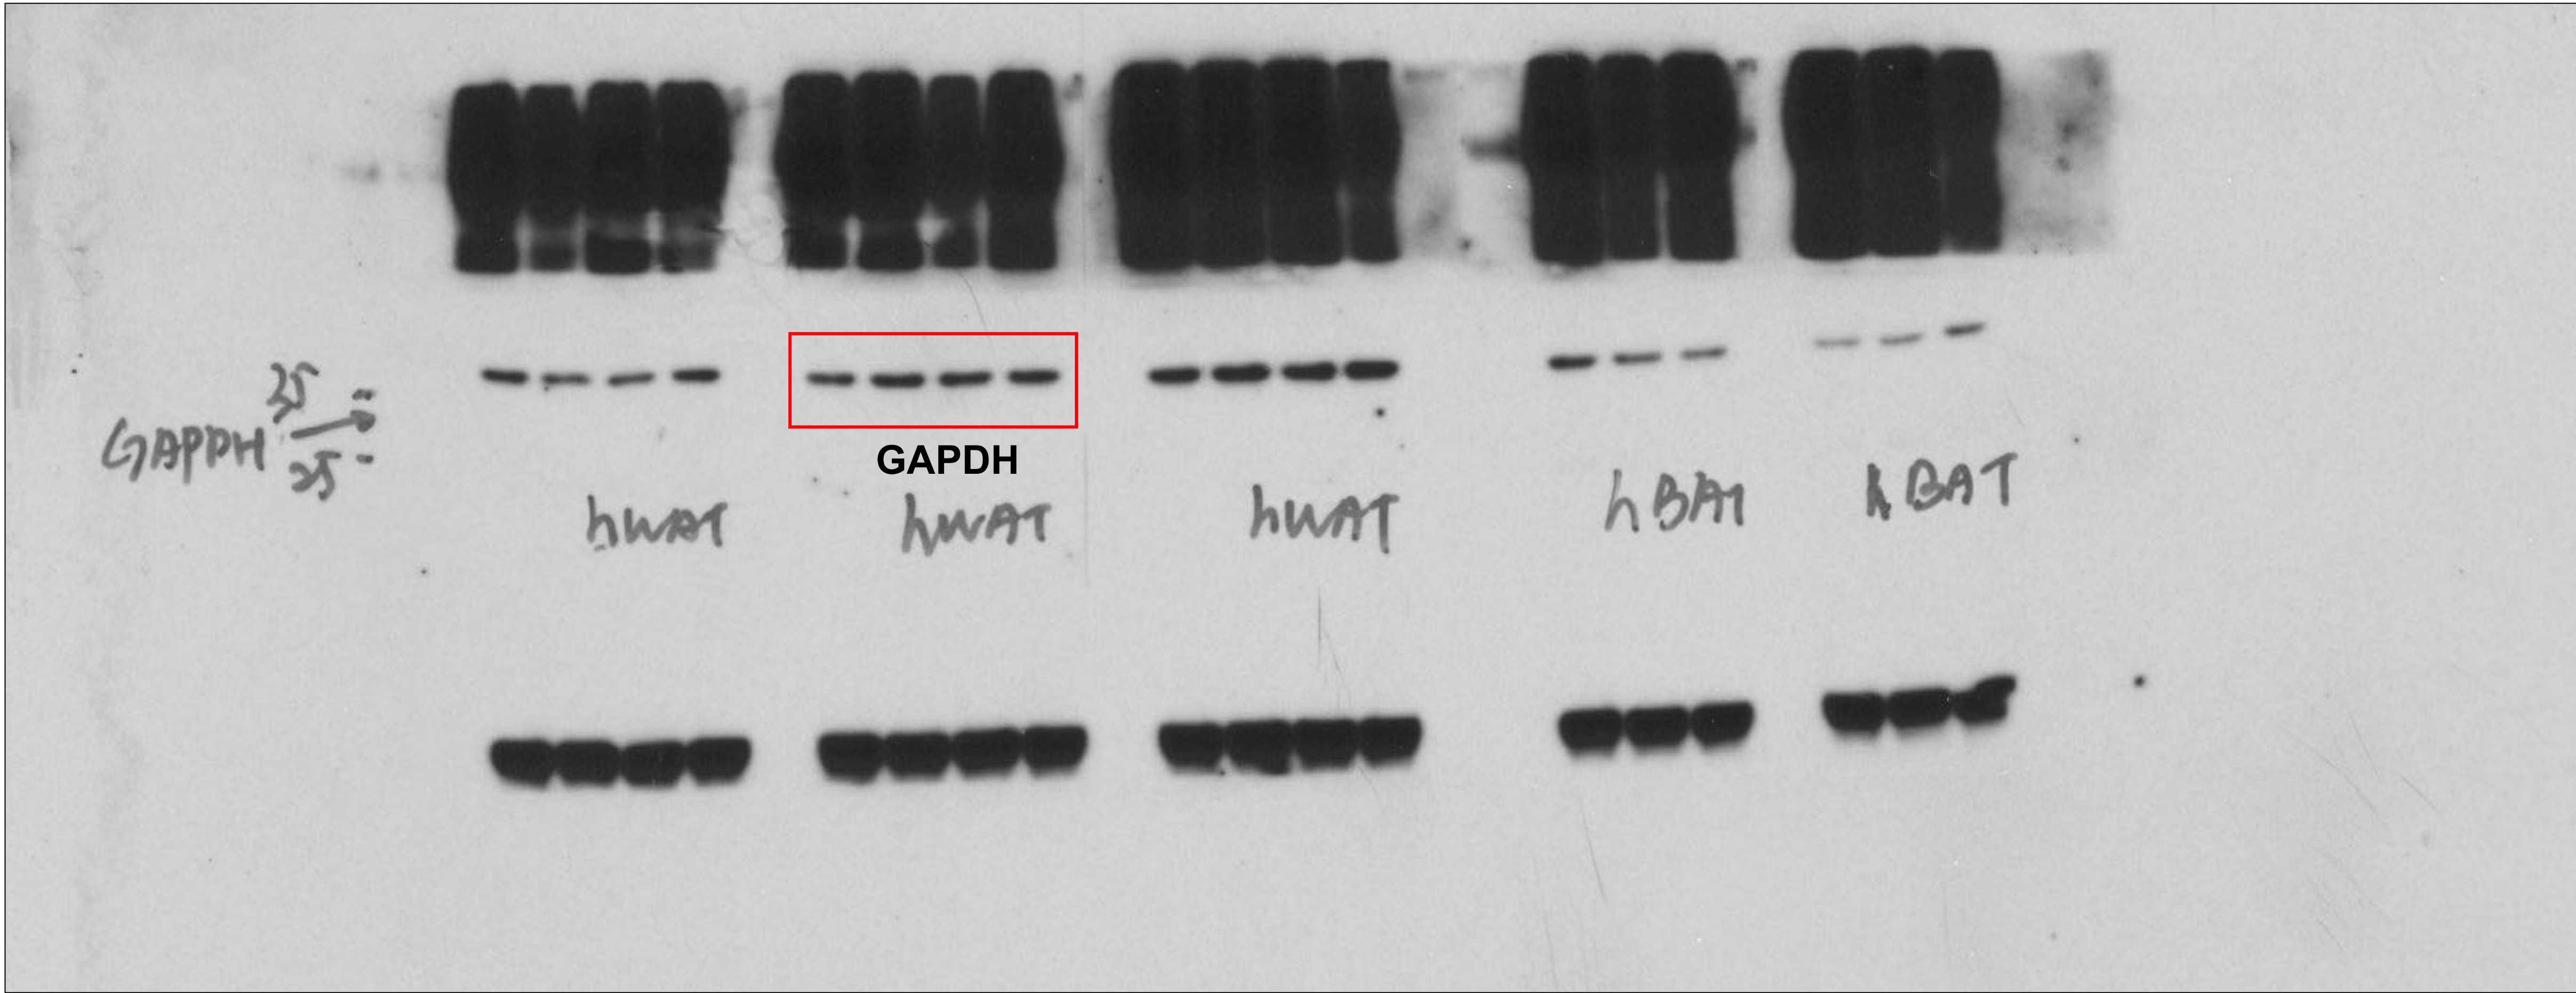

Figure 8d

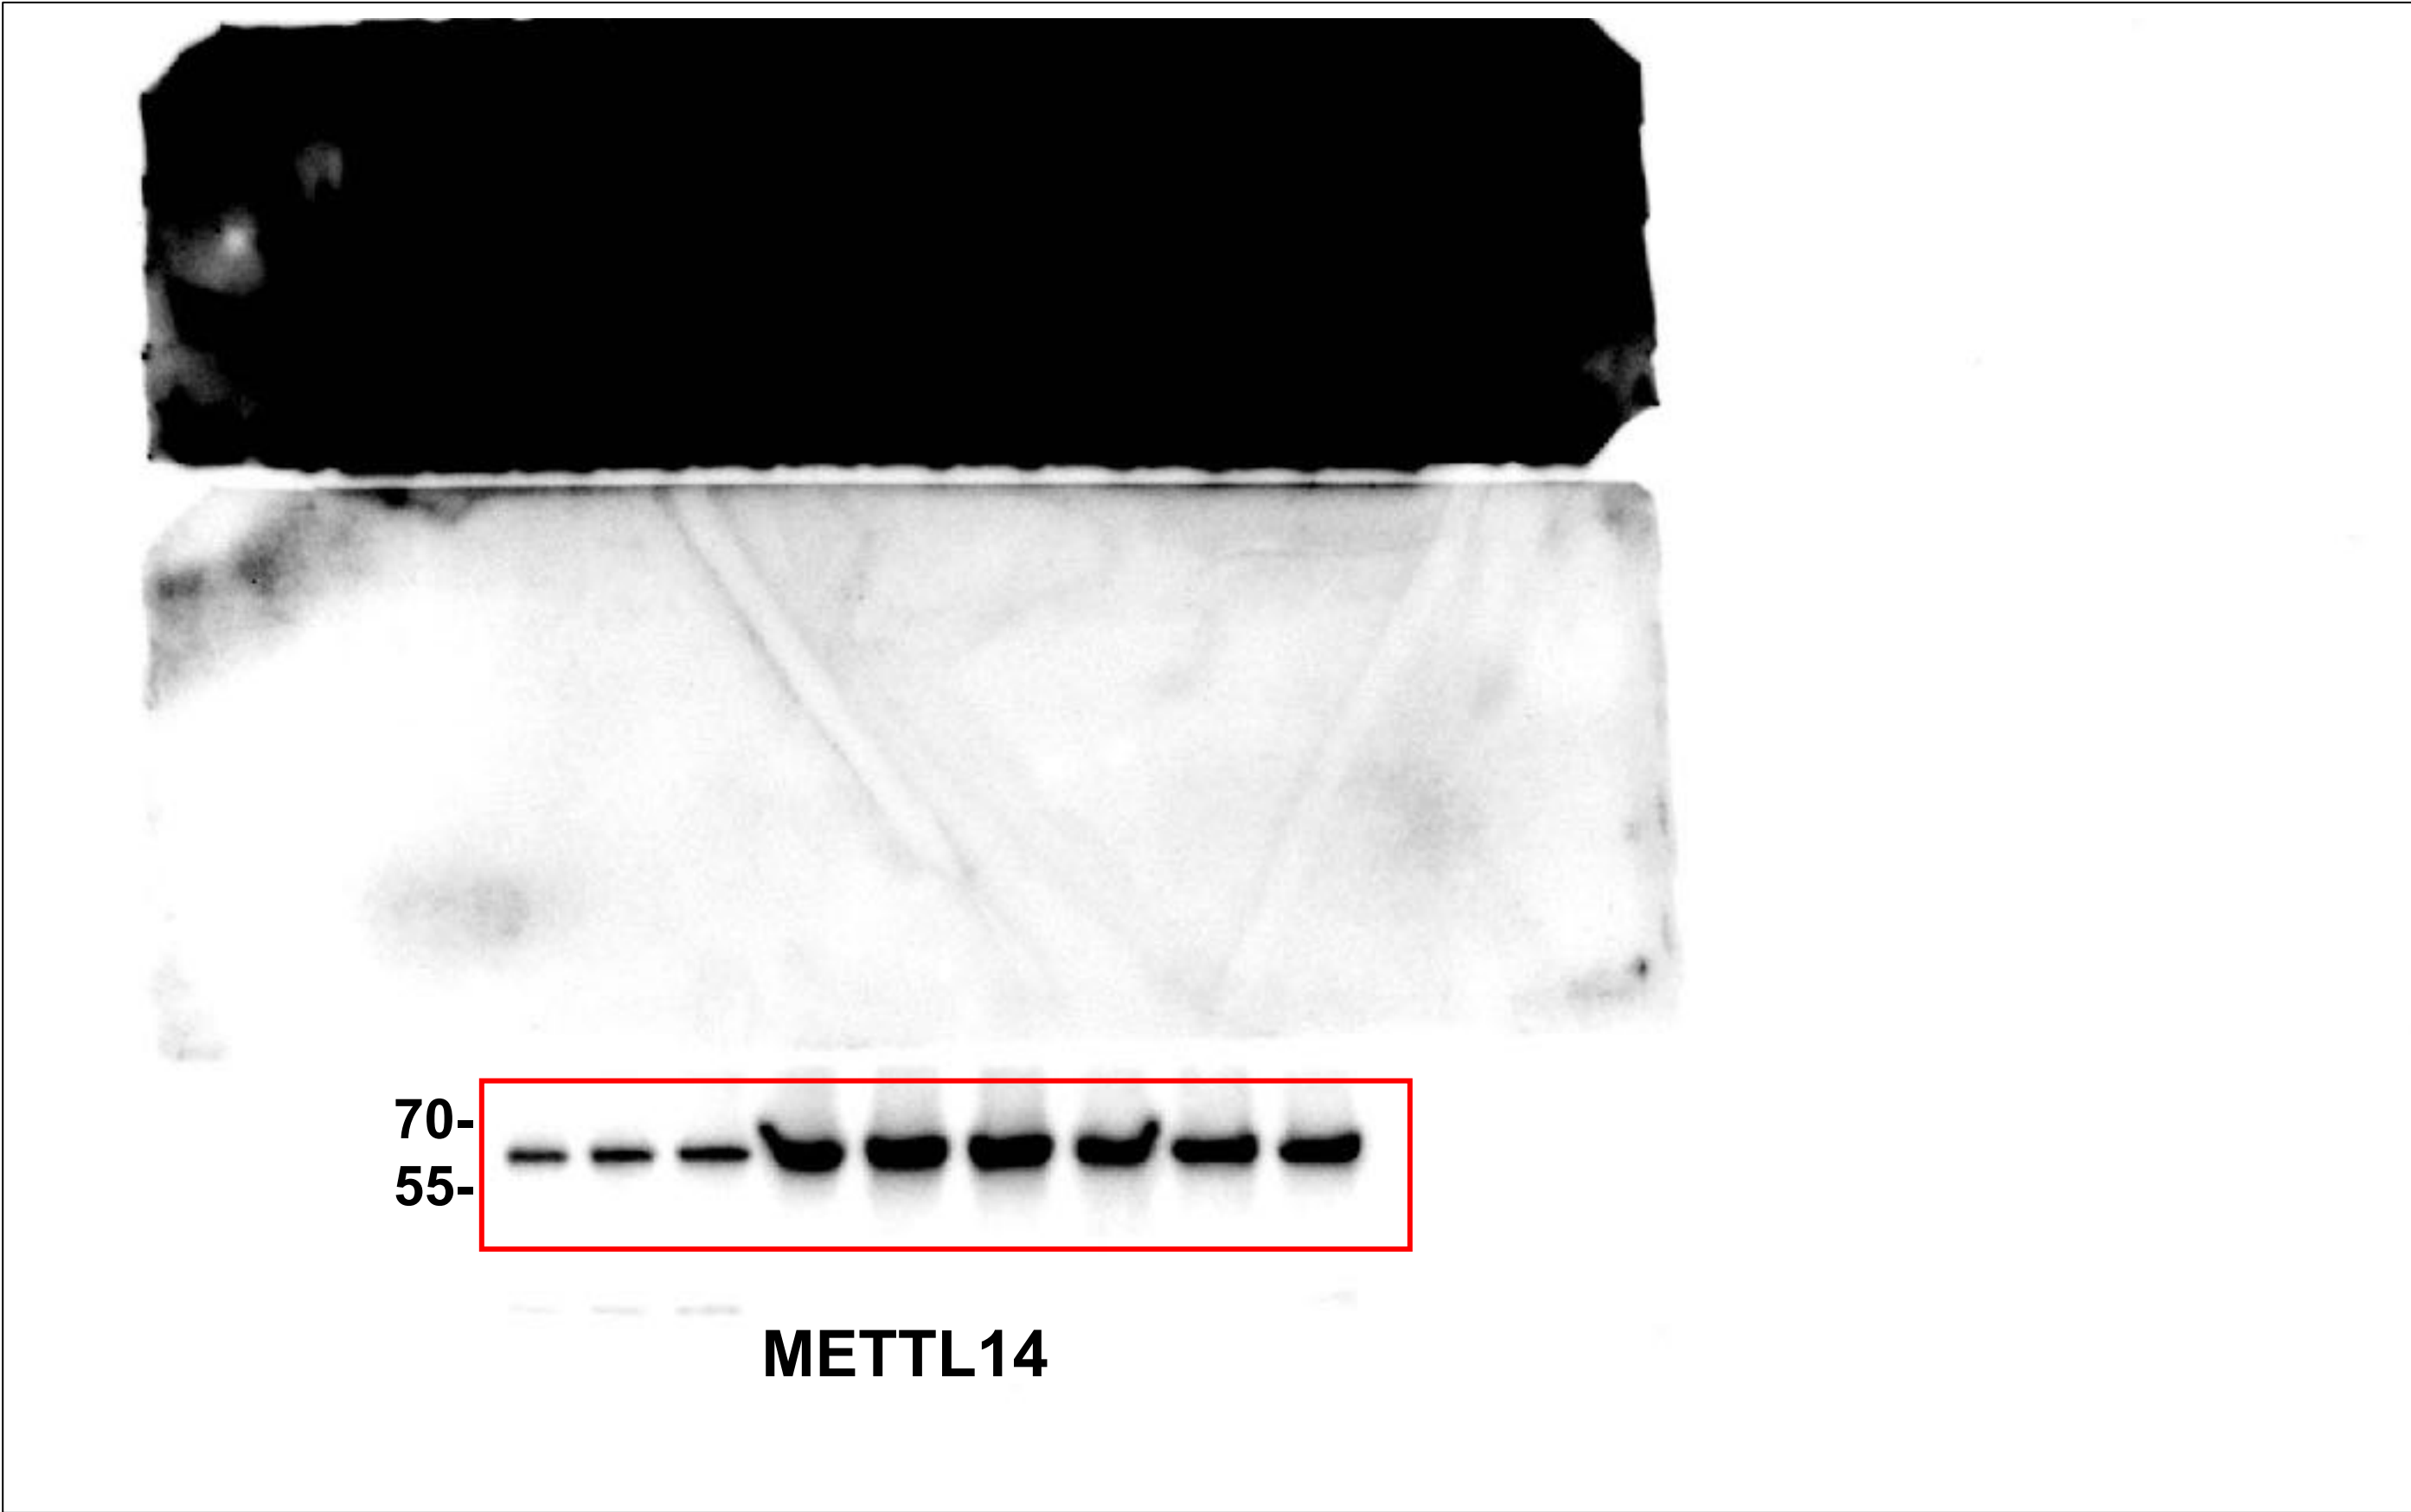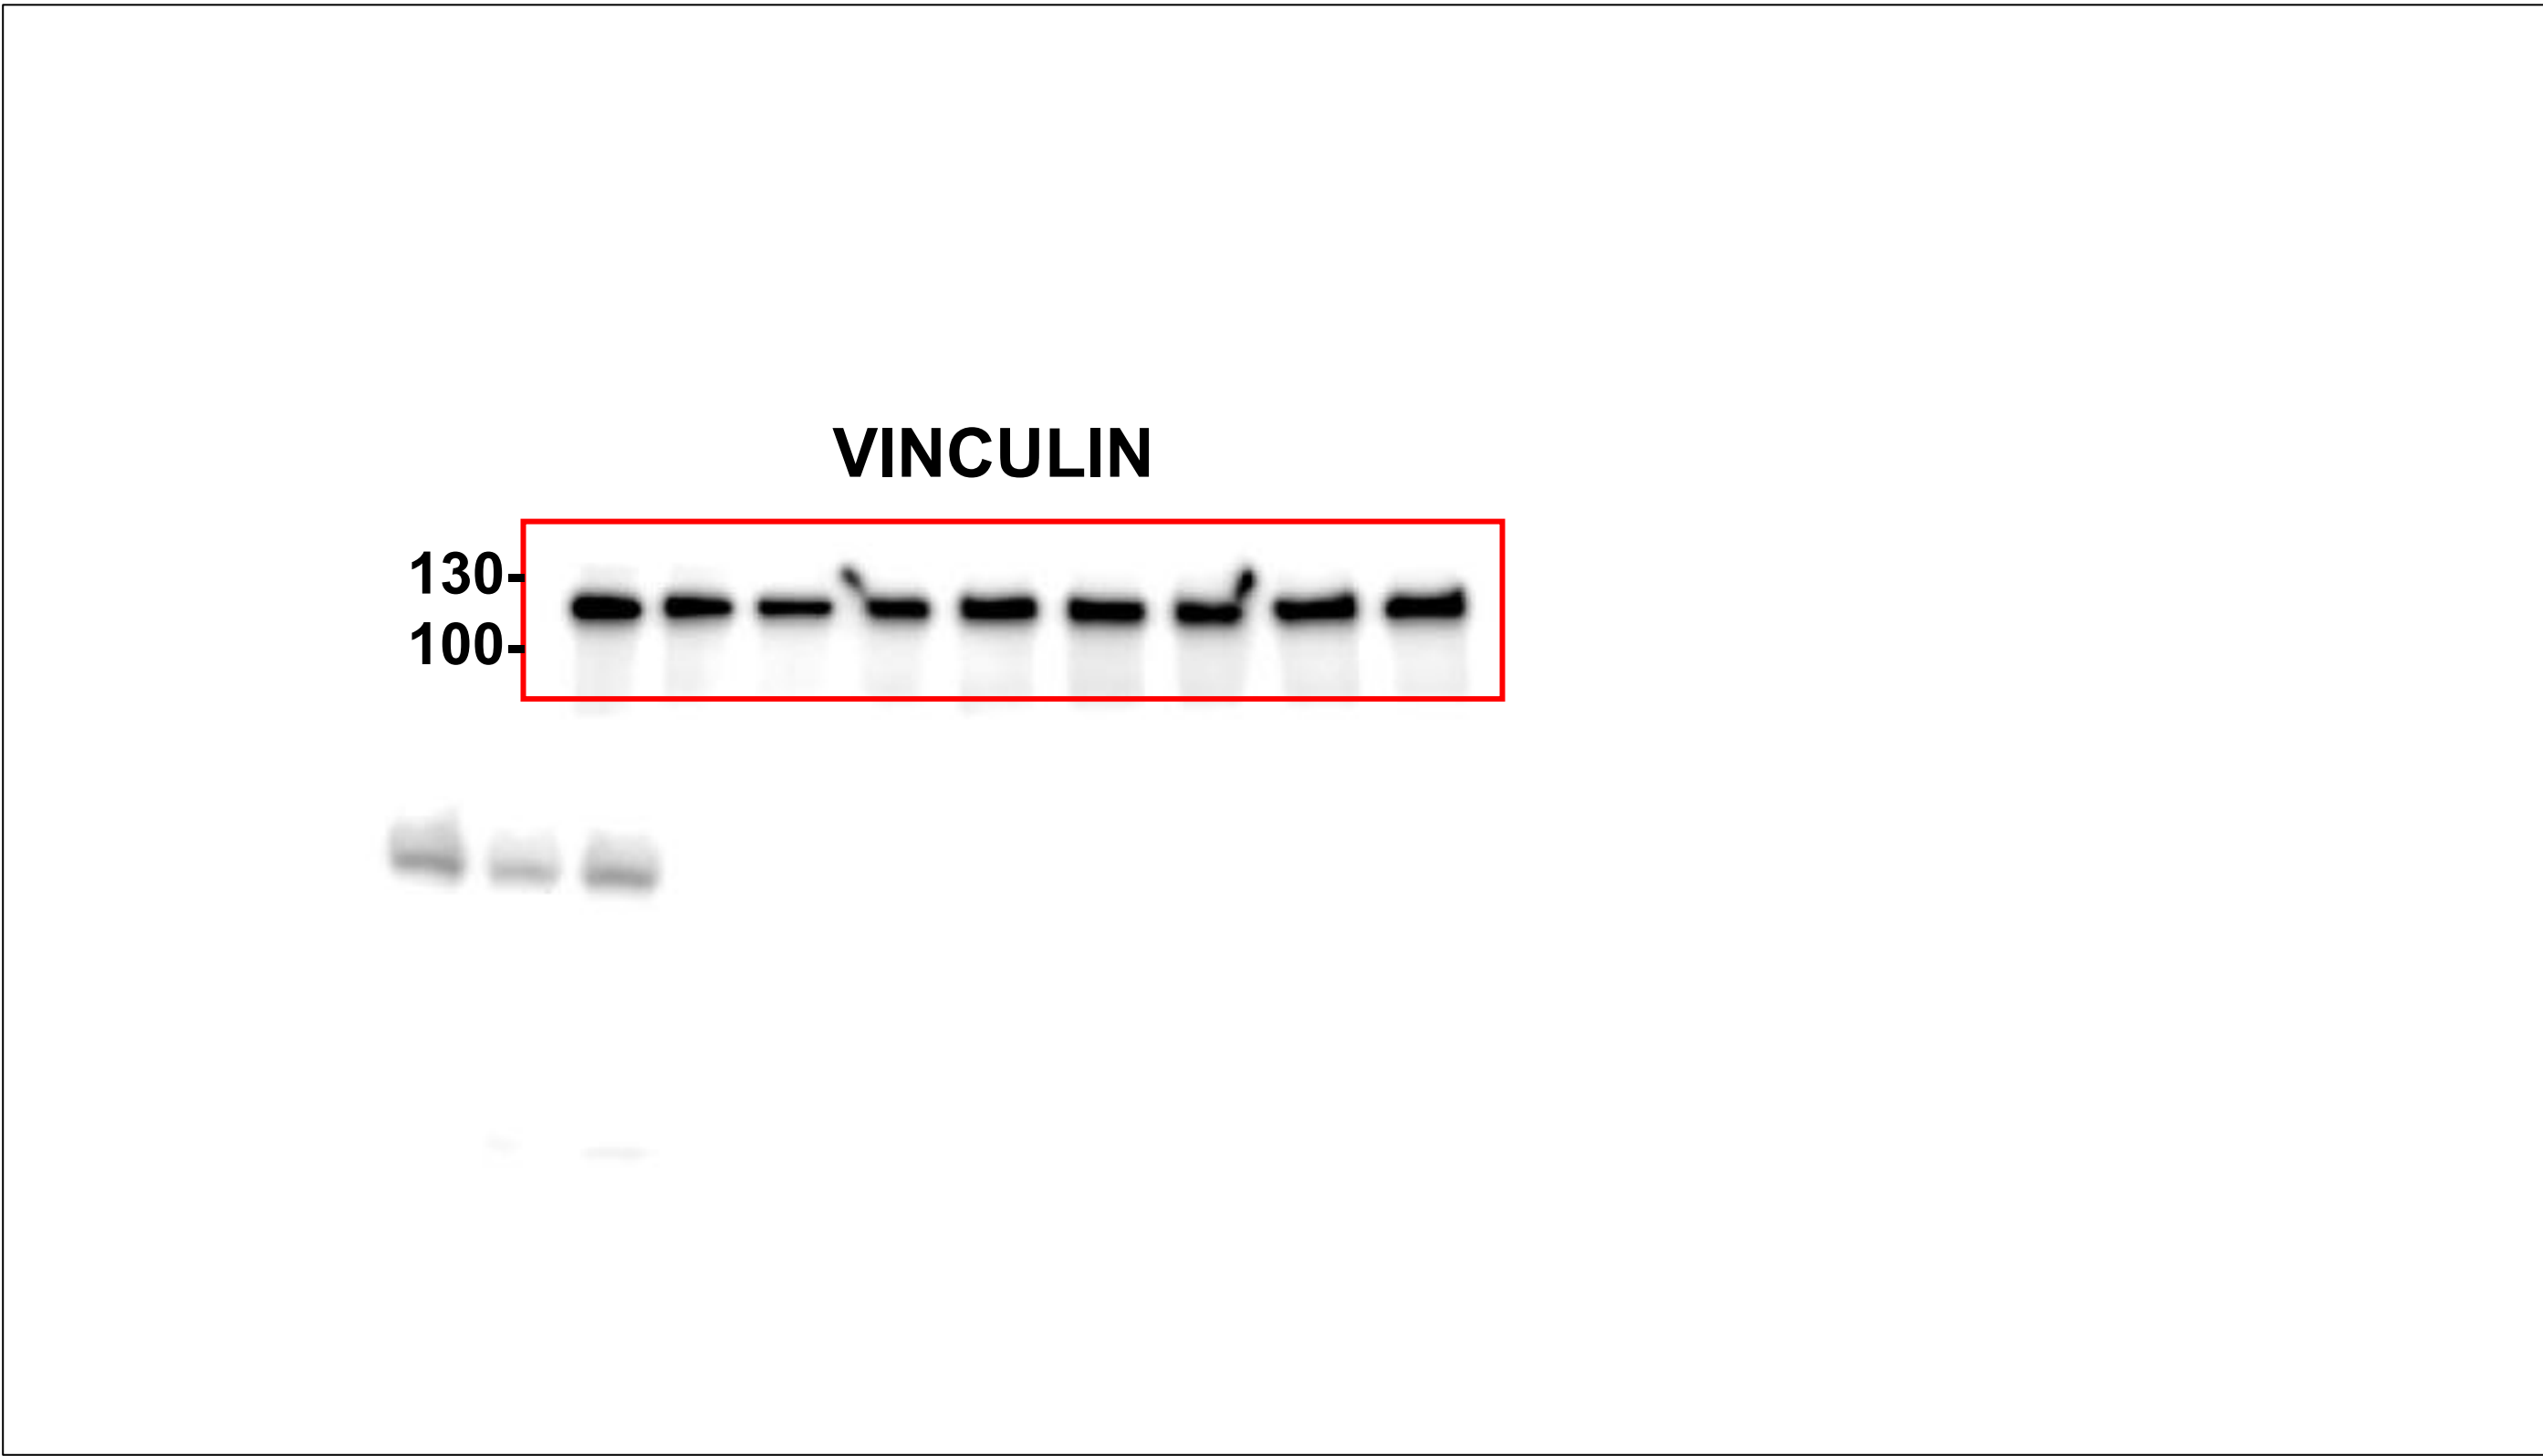



Figure 8i

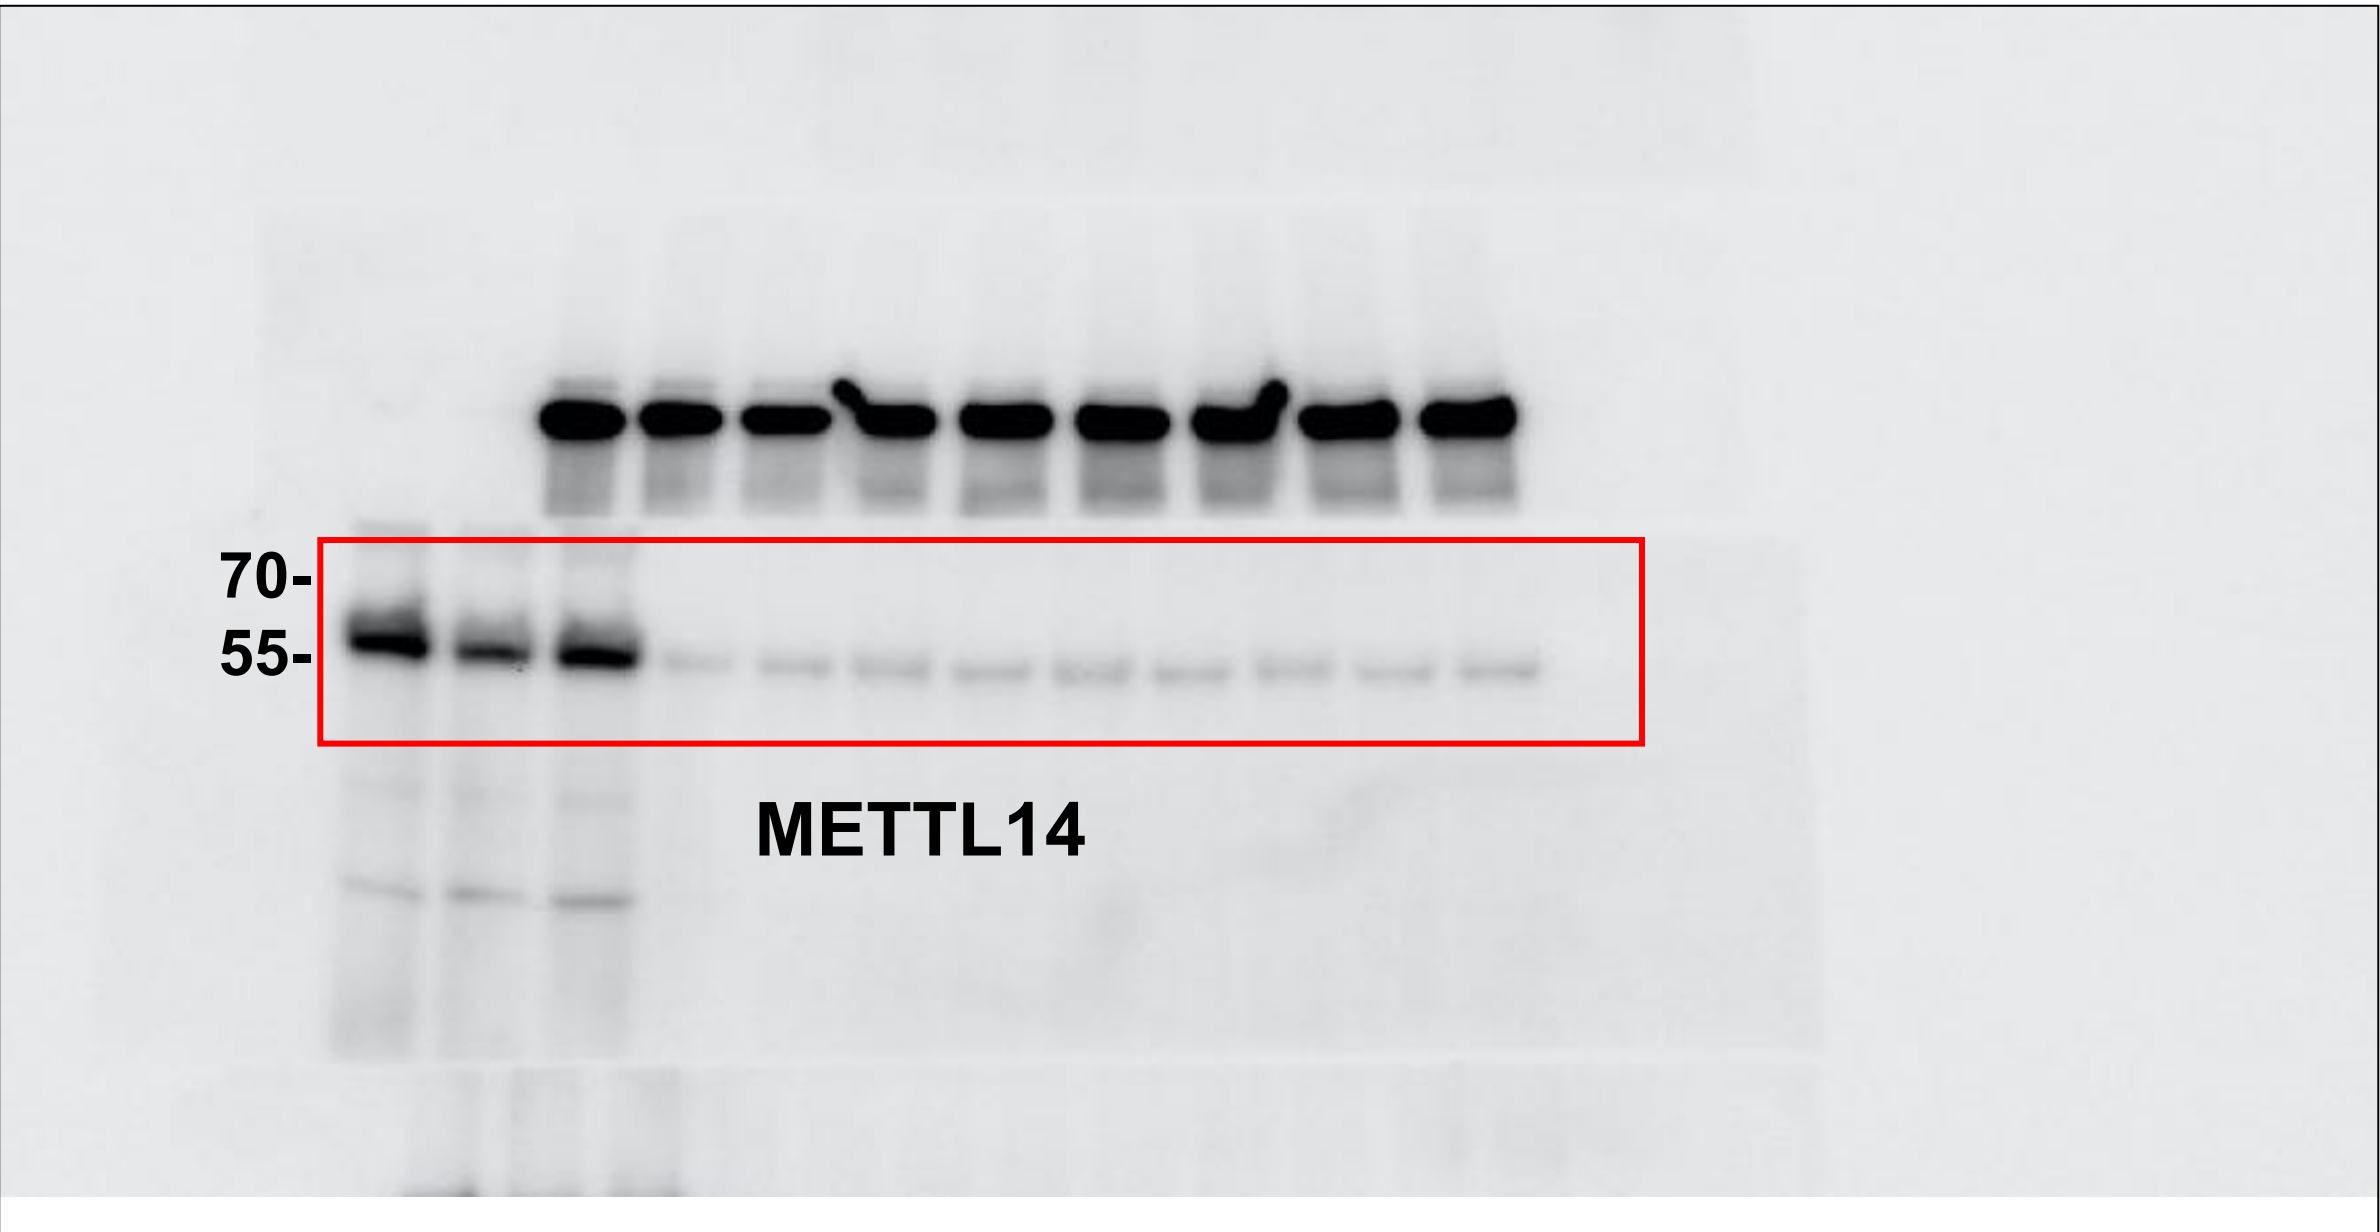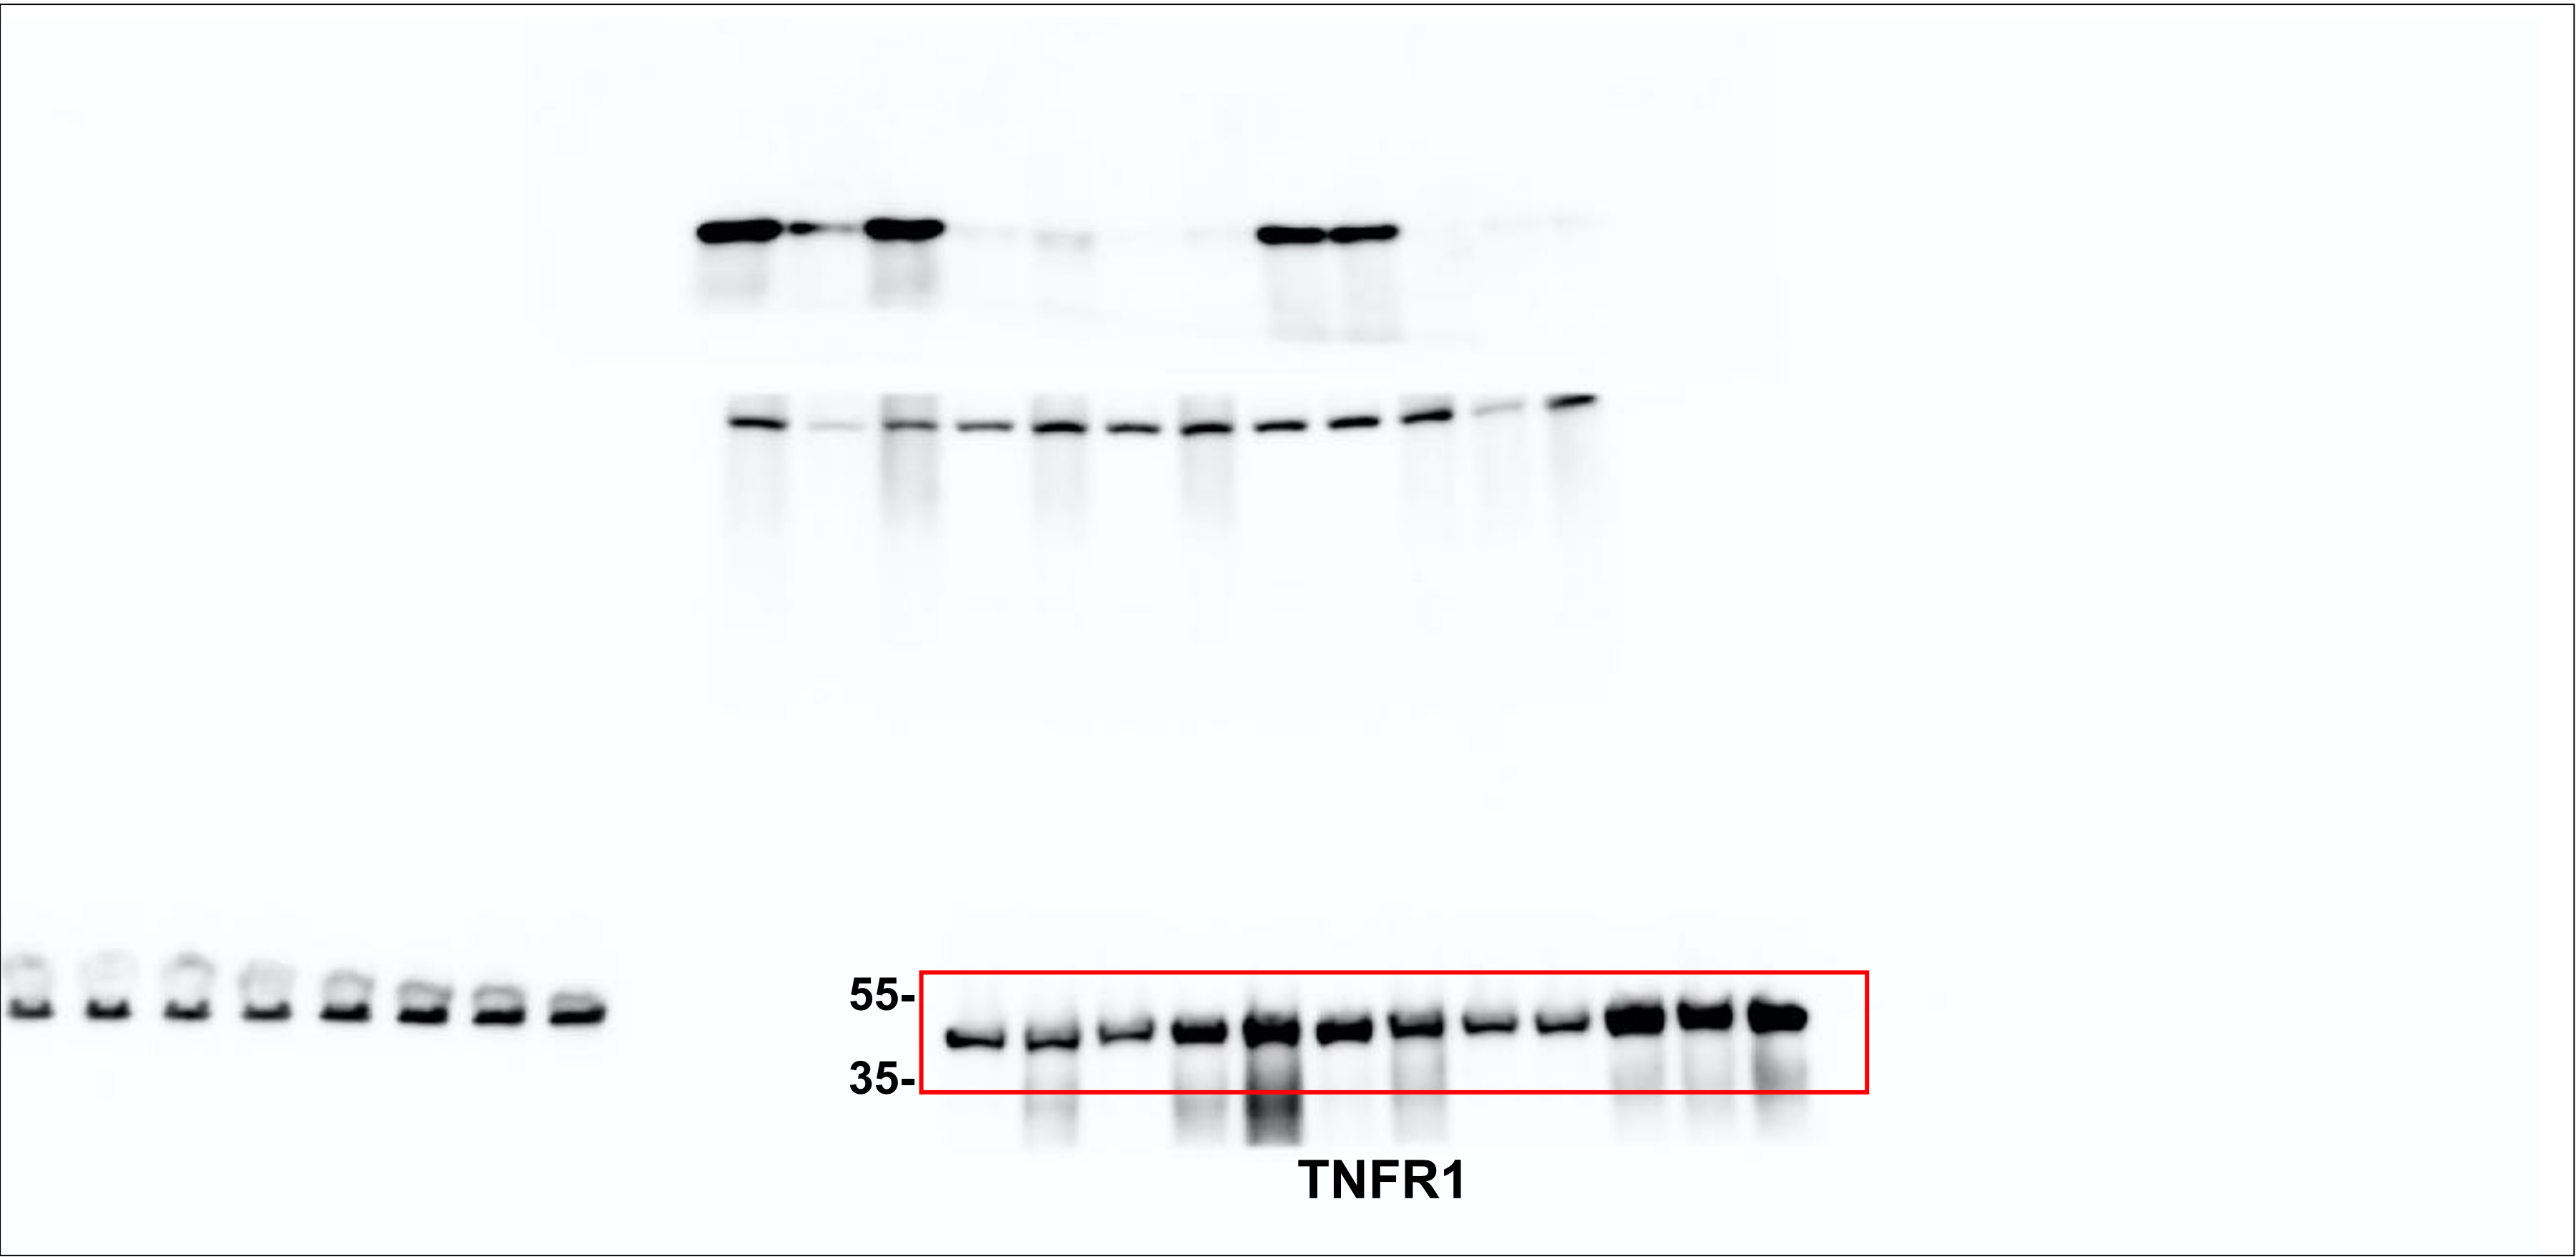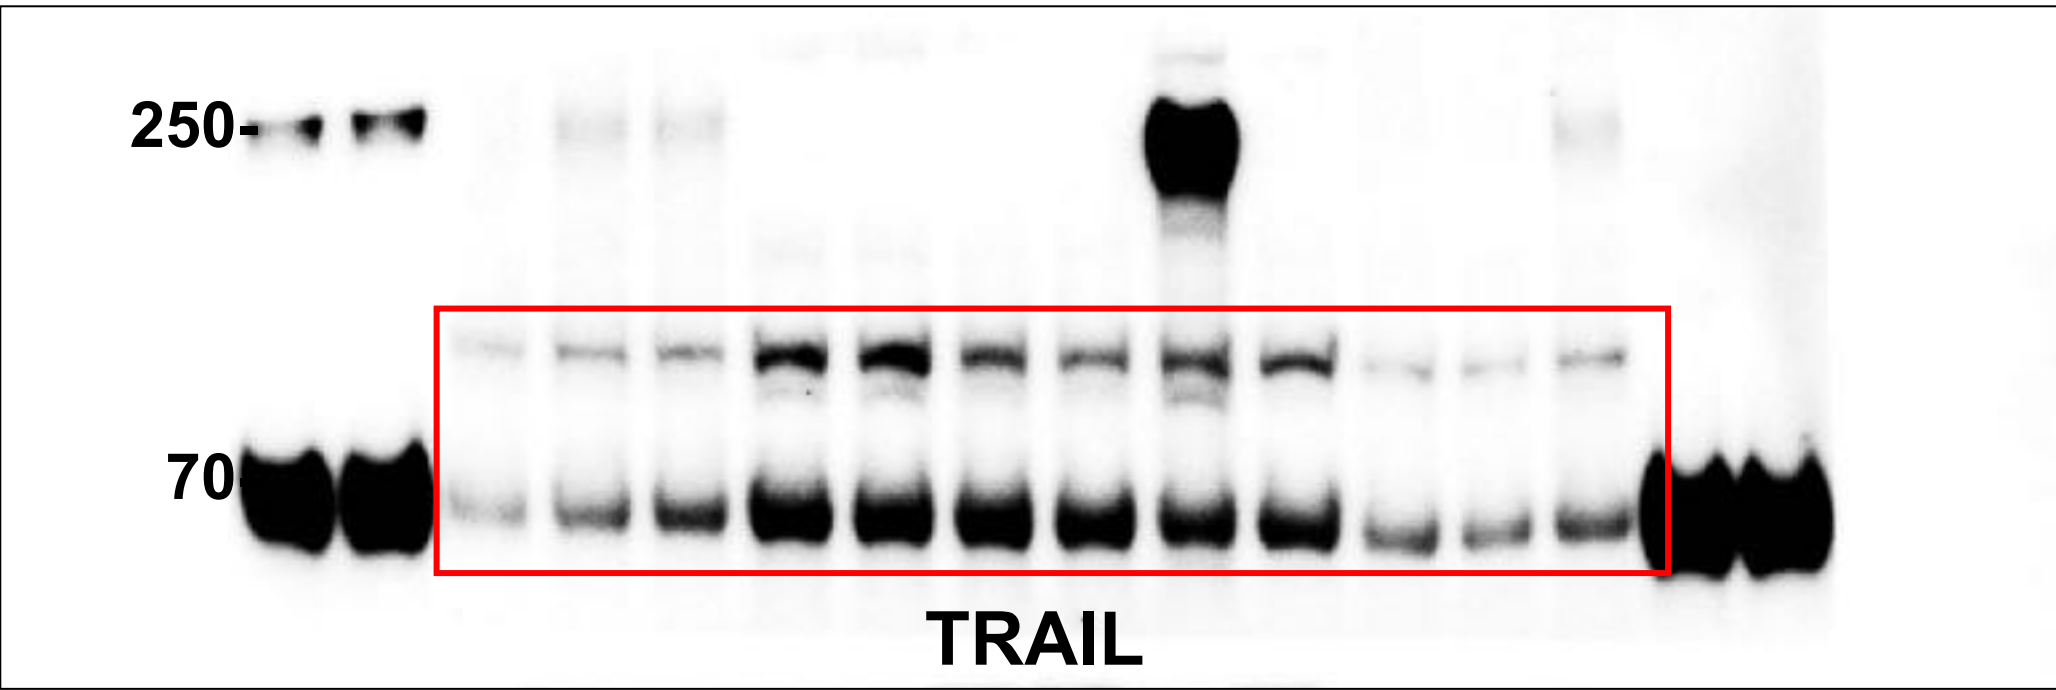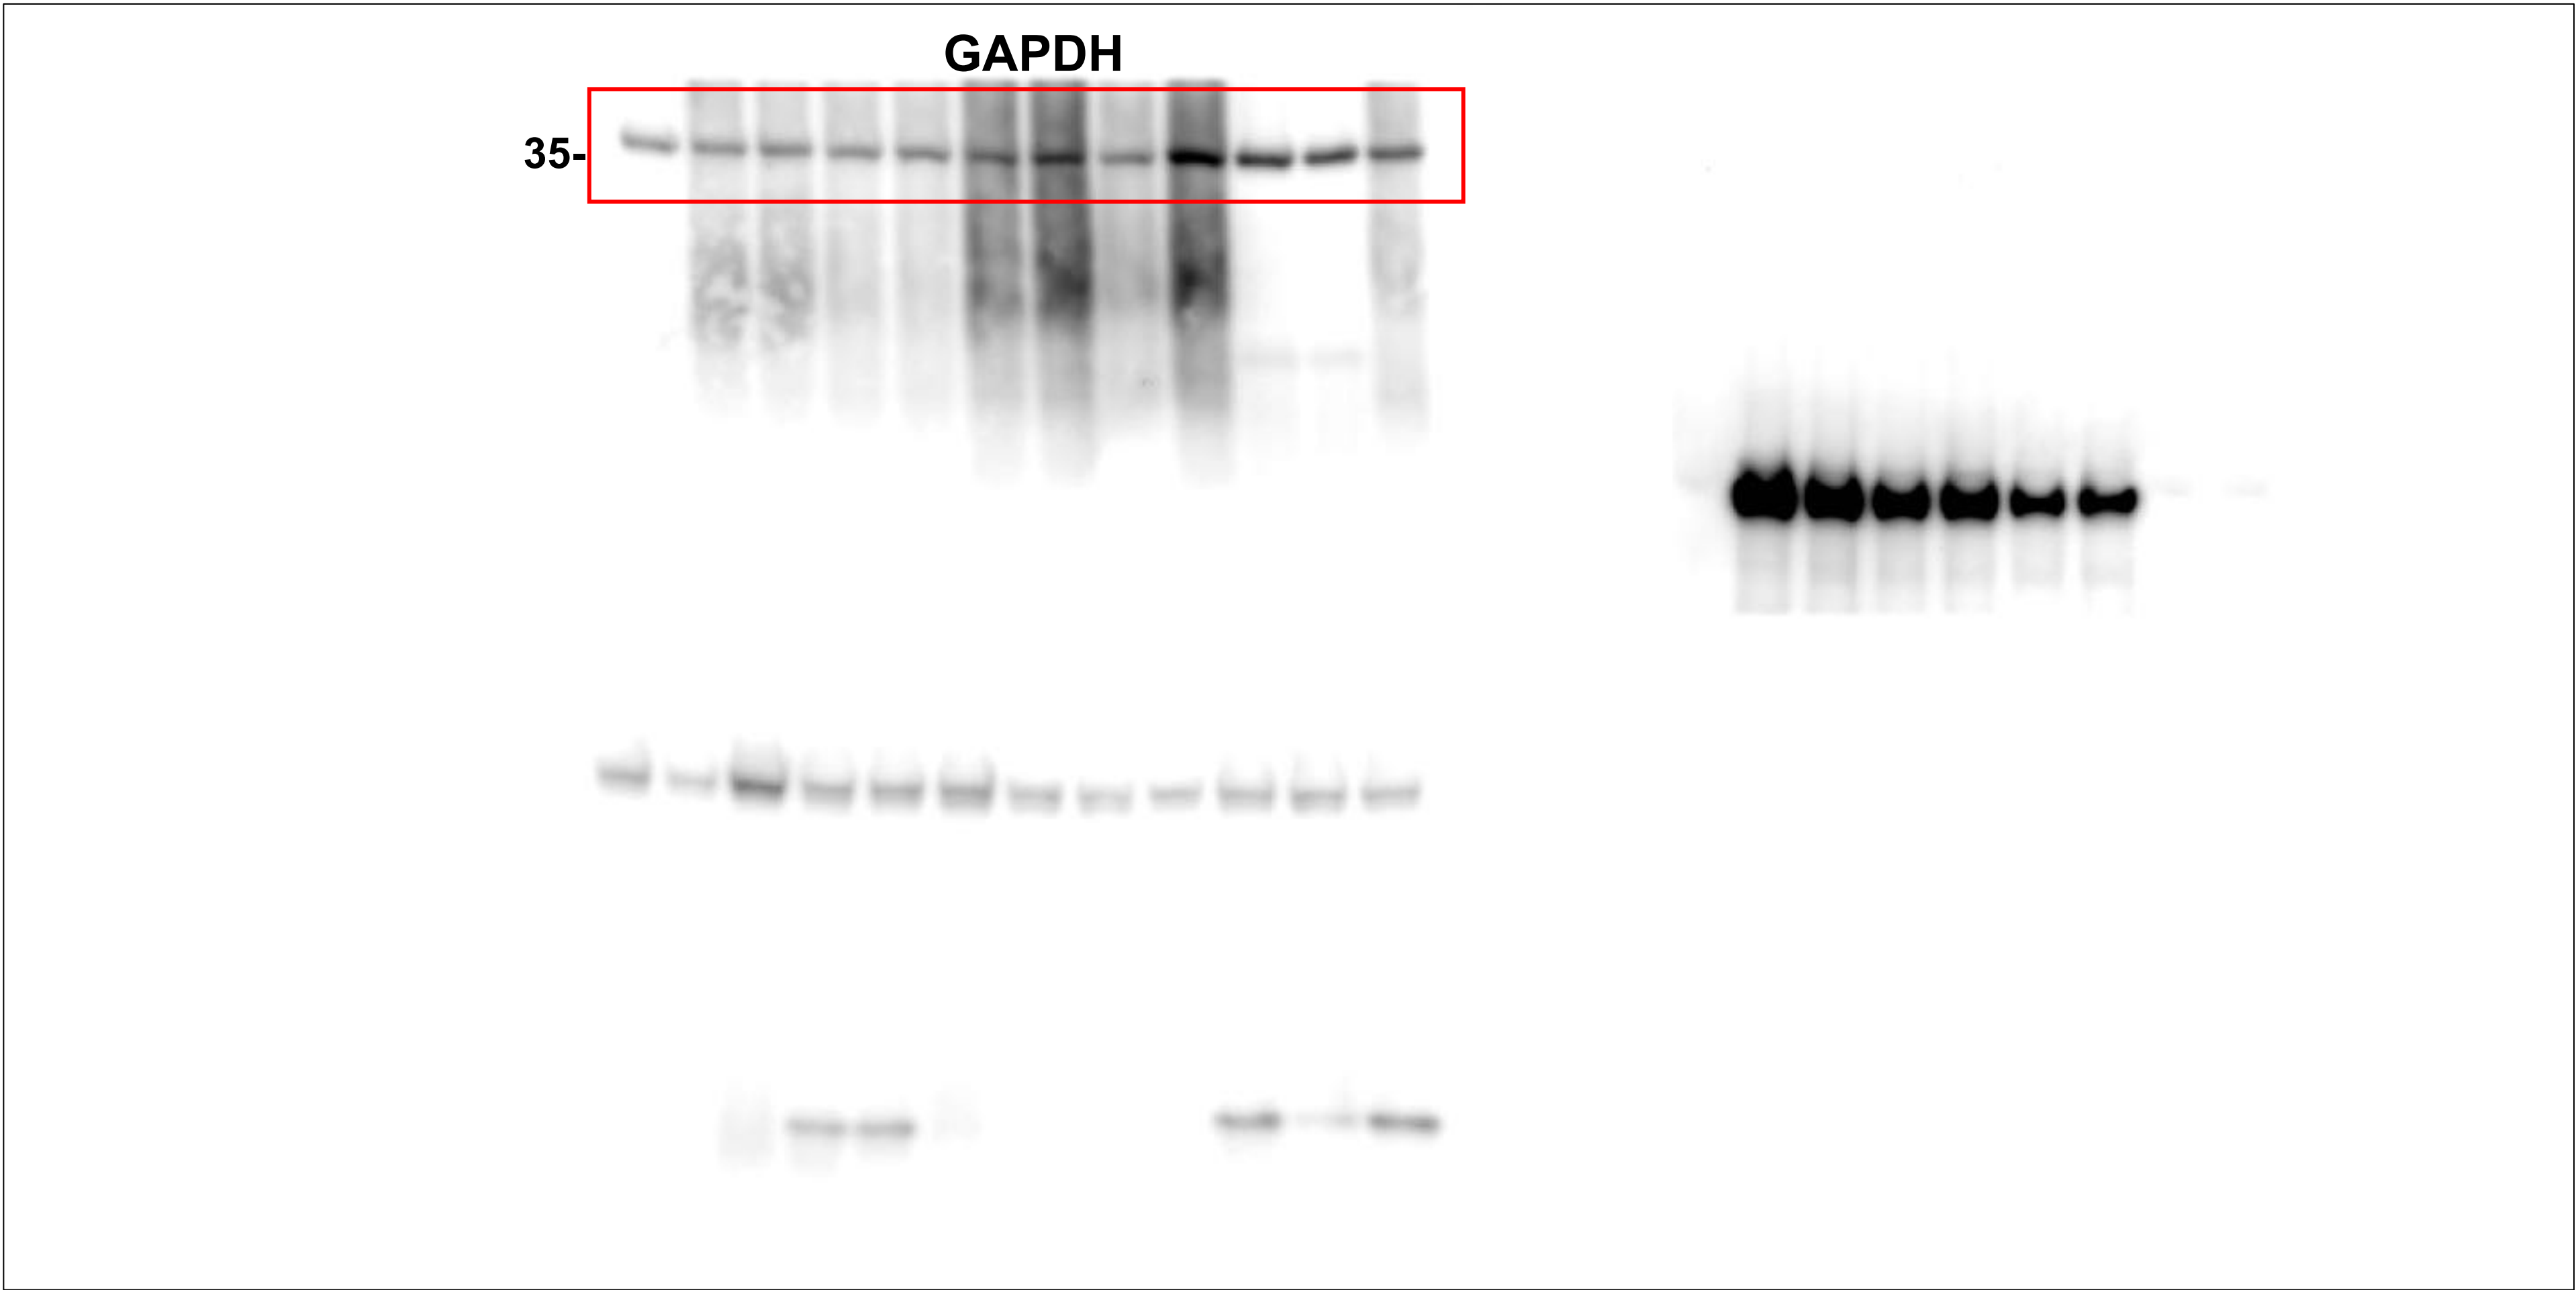



Figure 8m

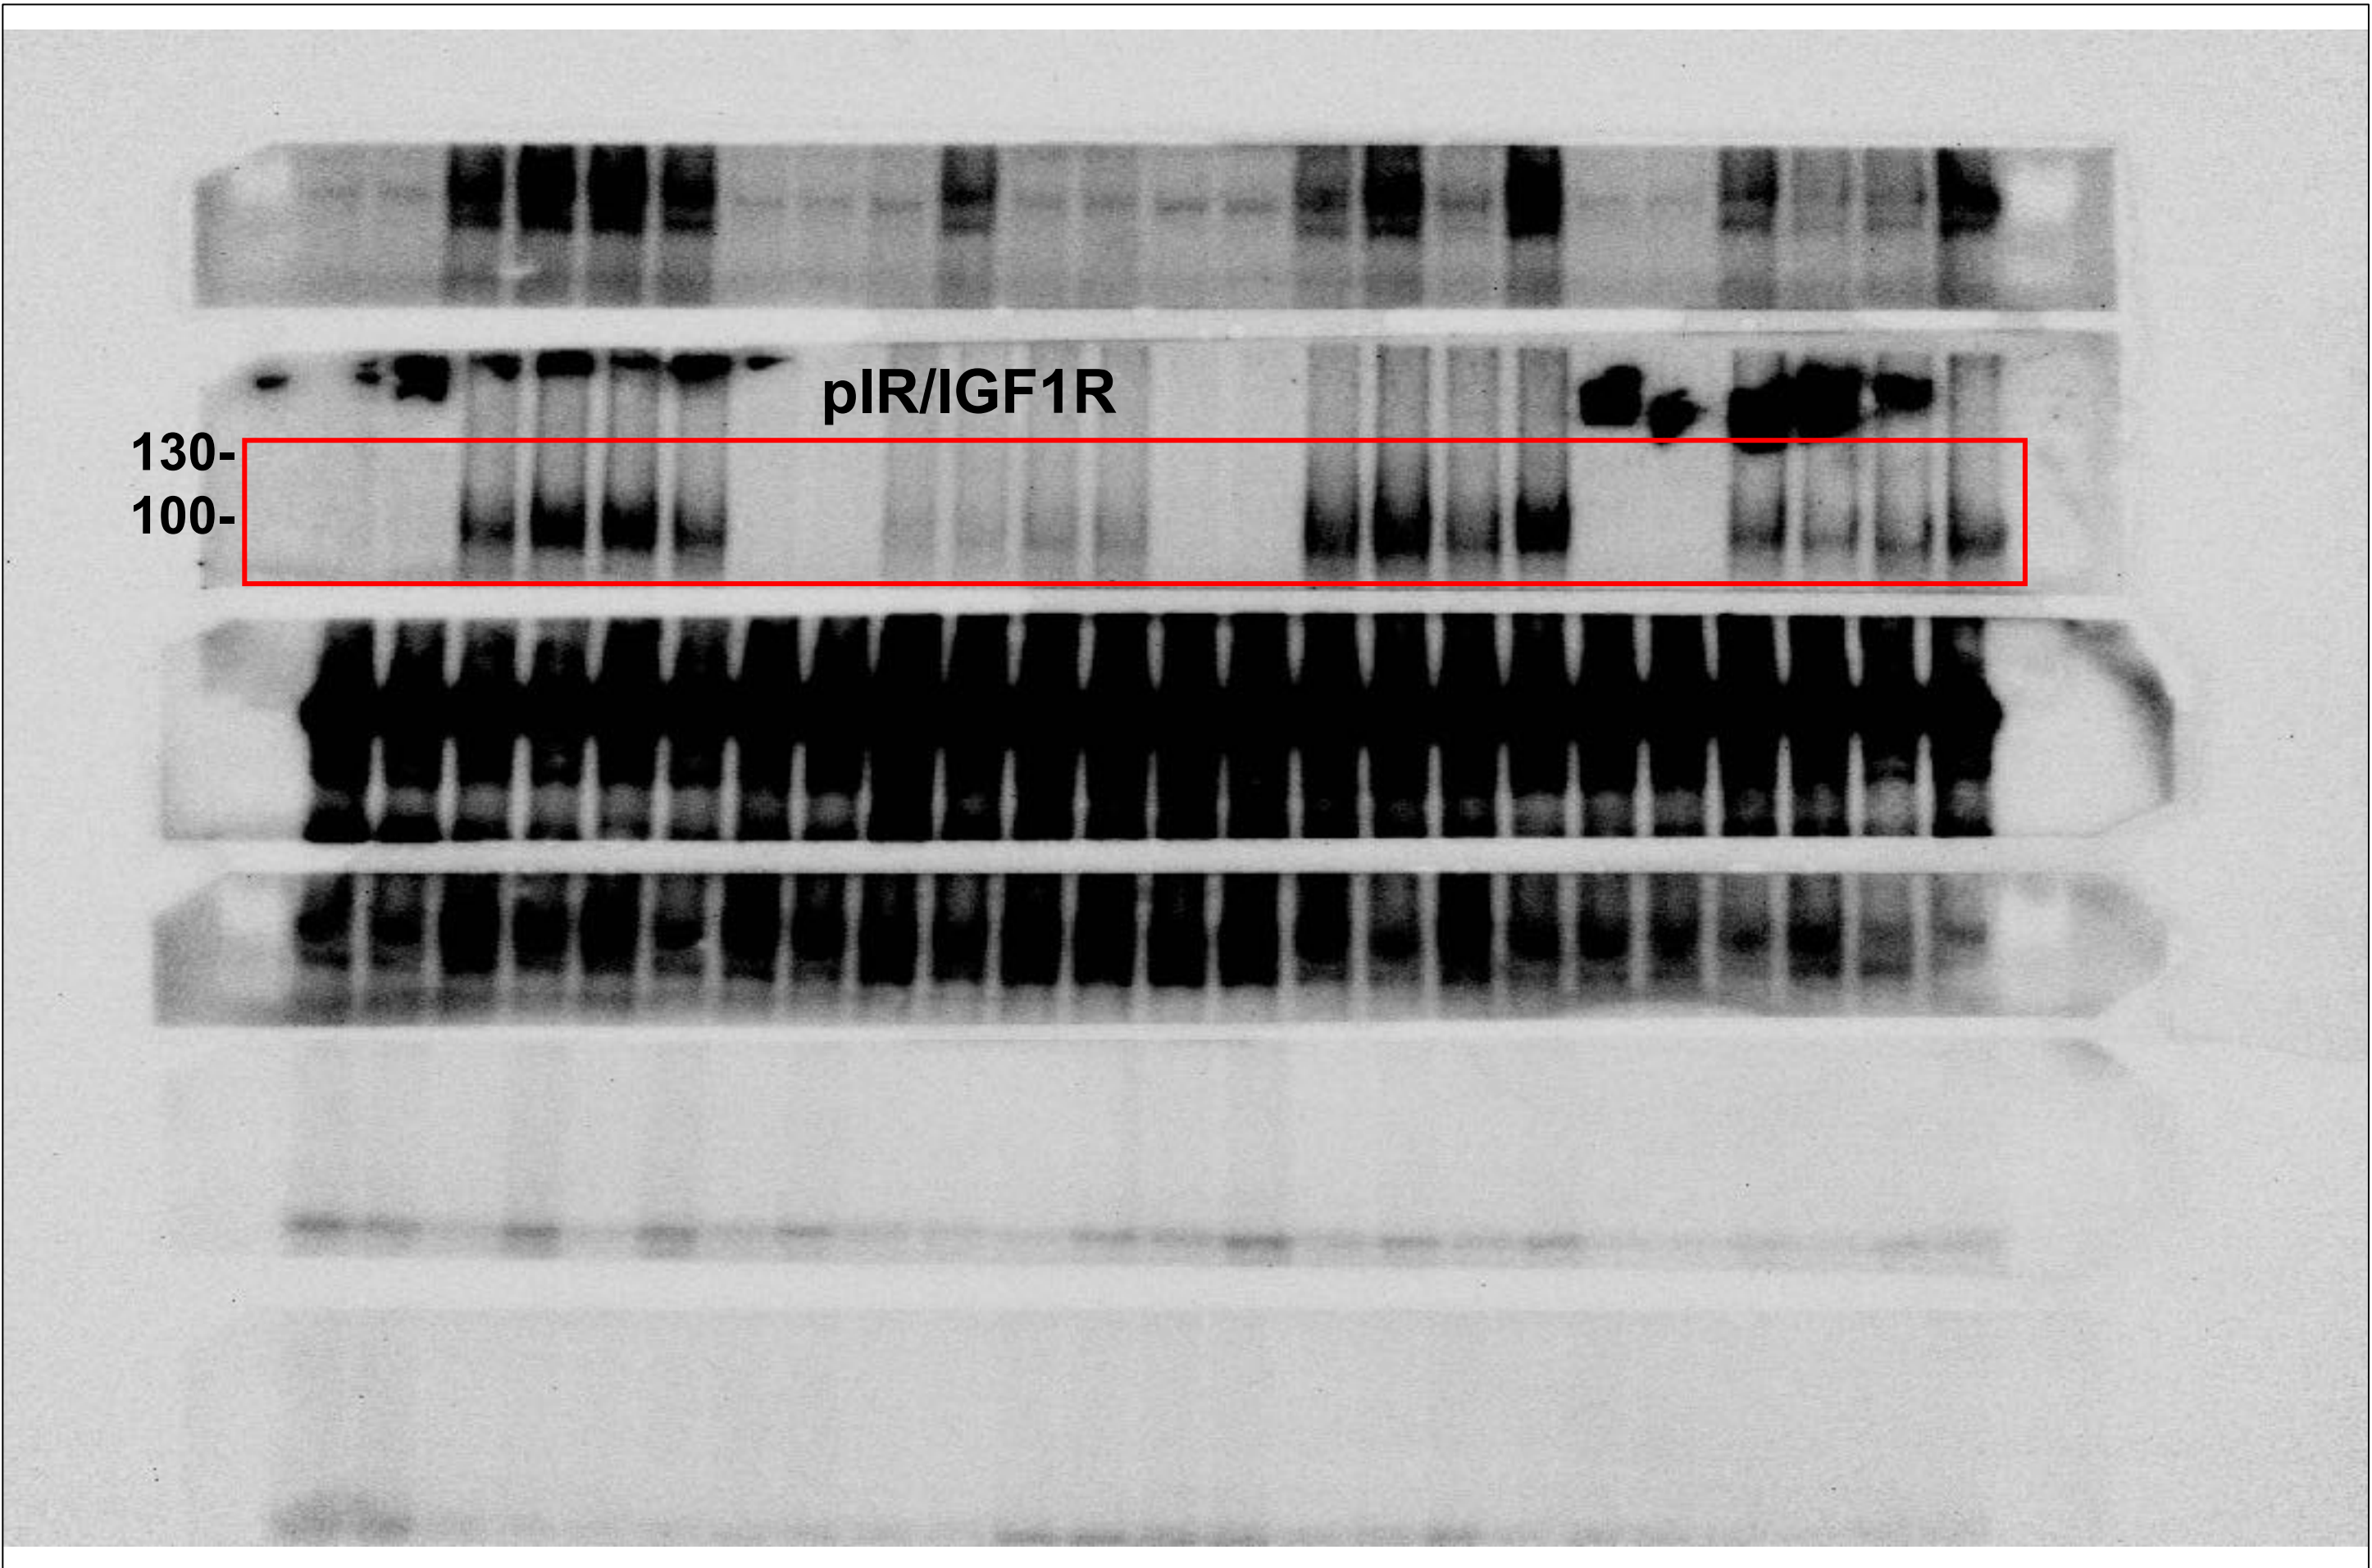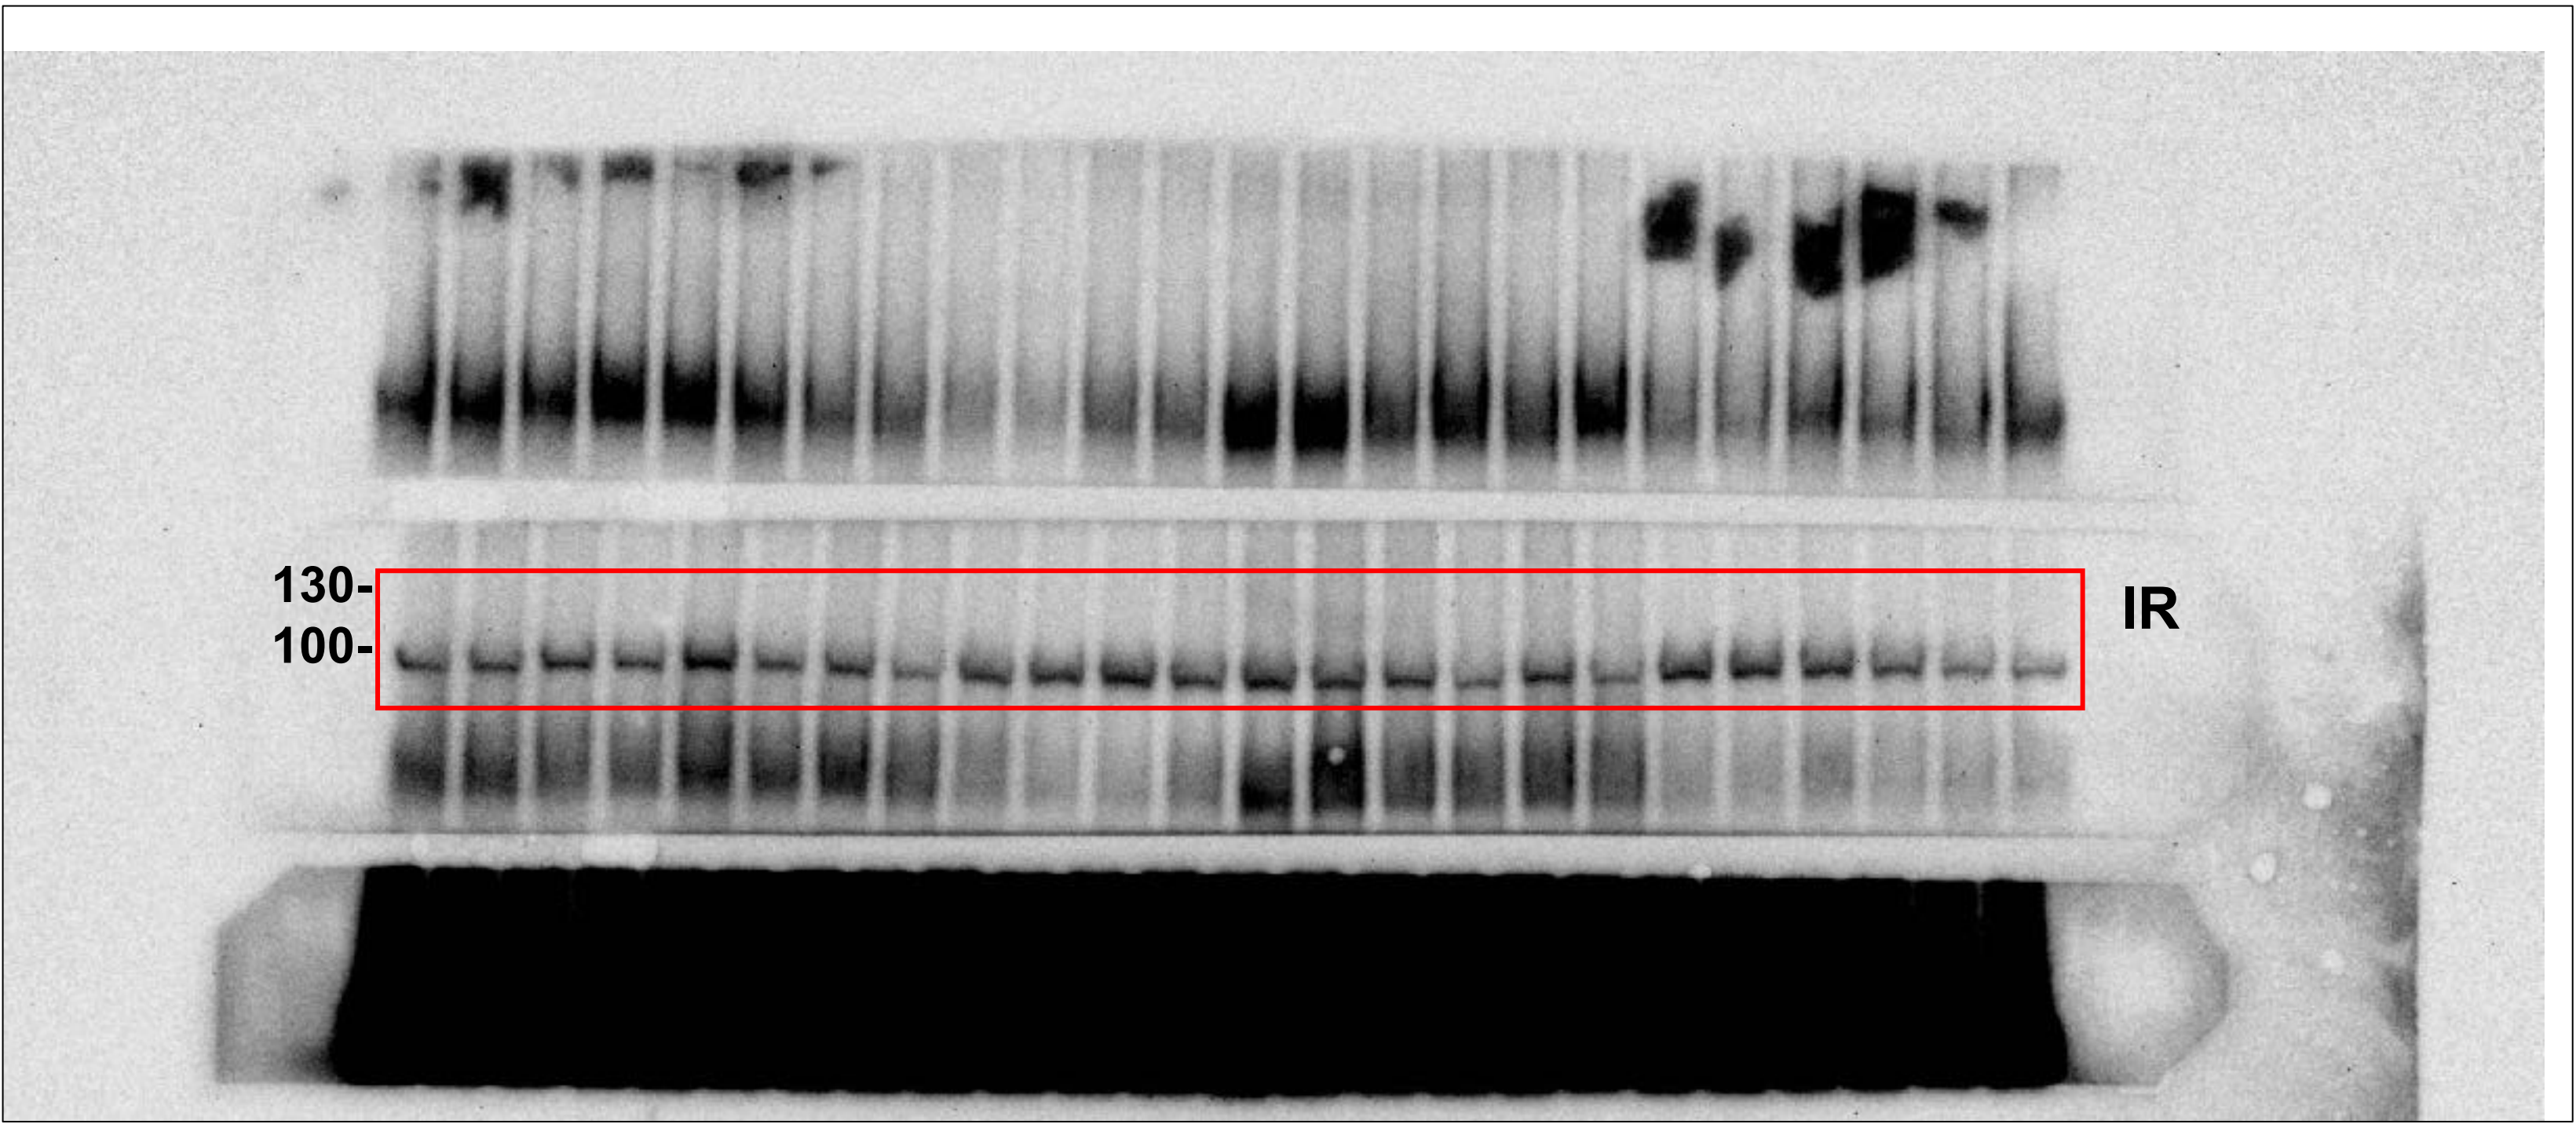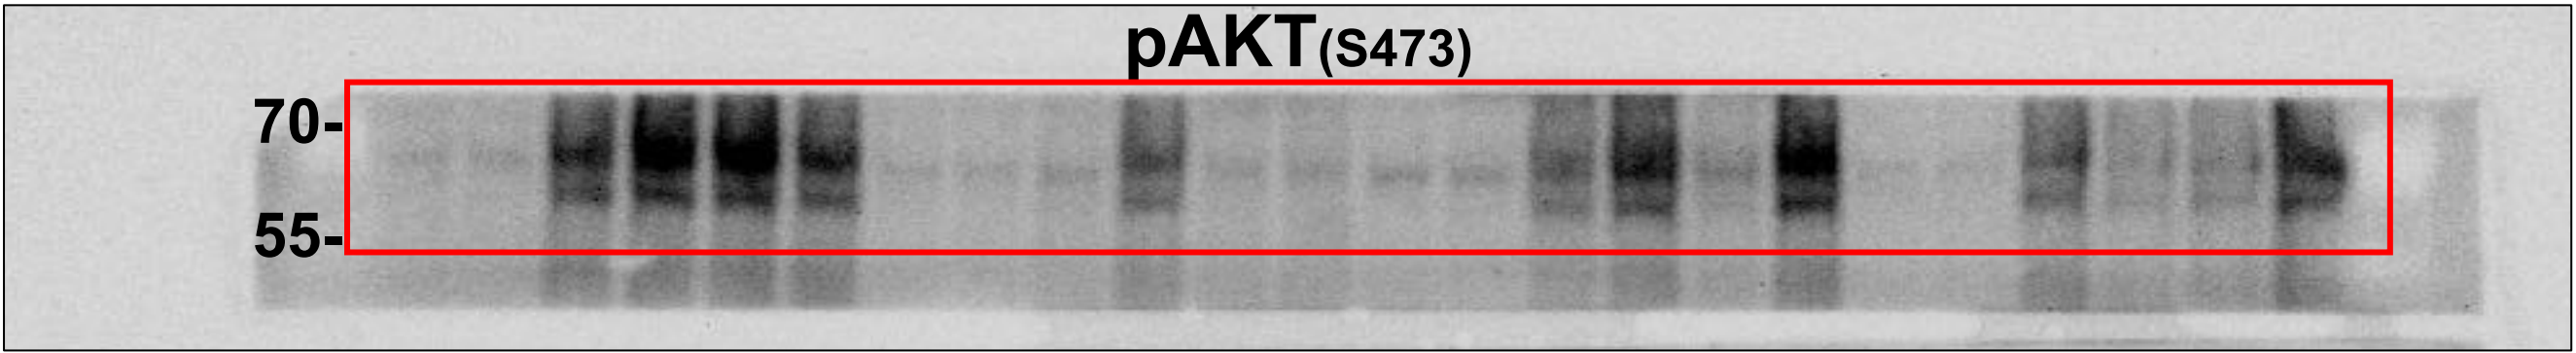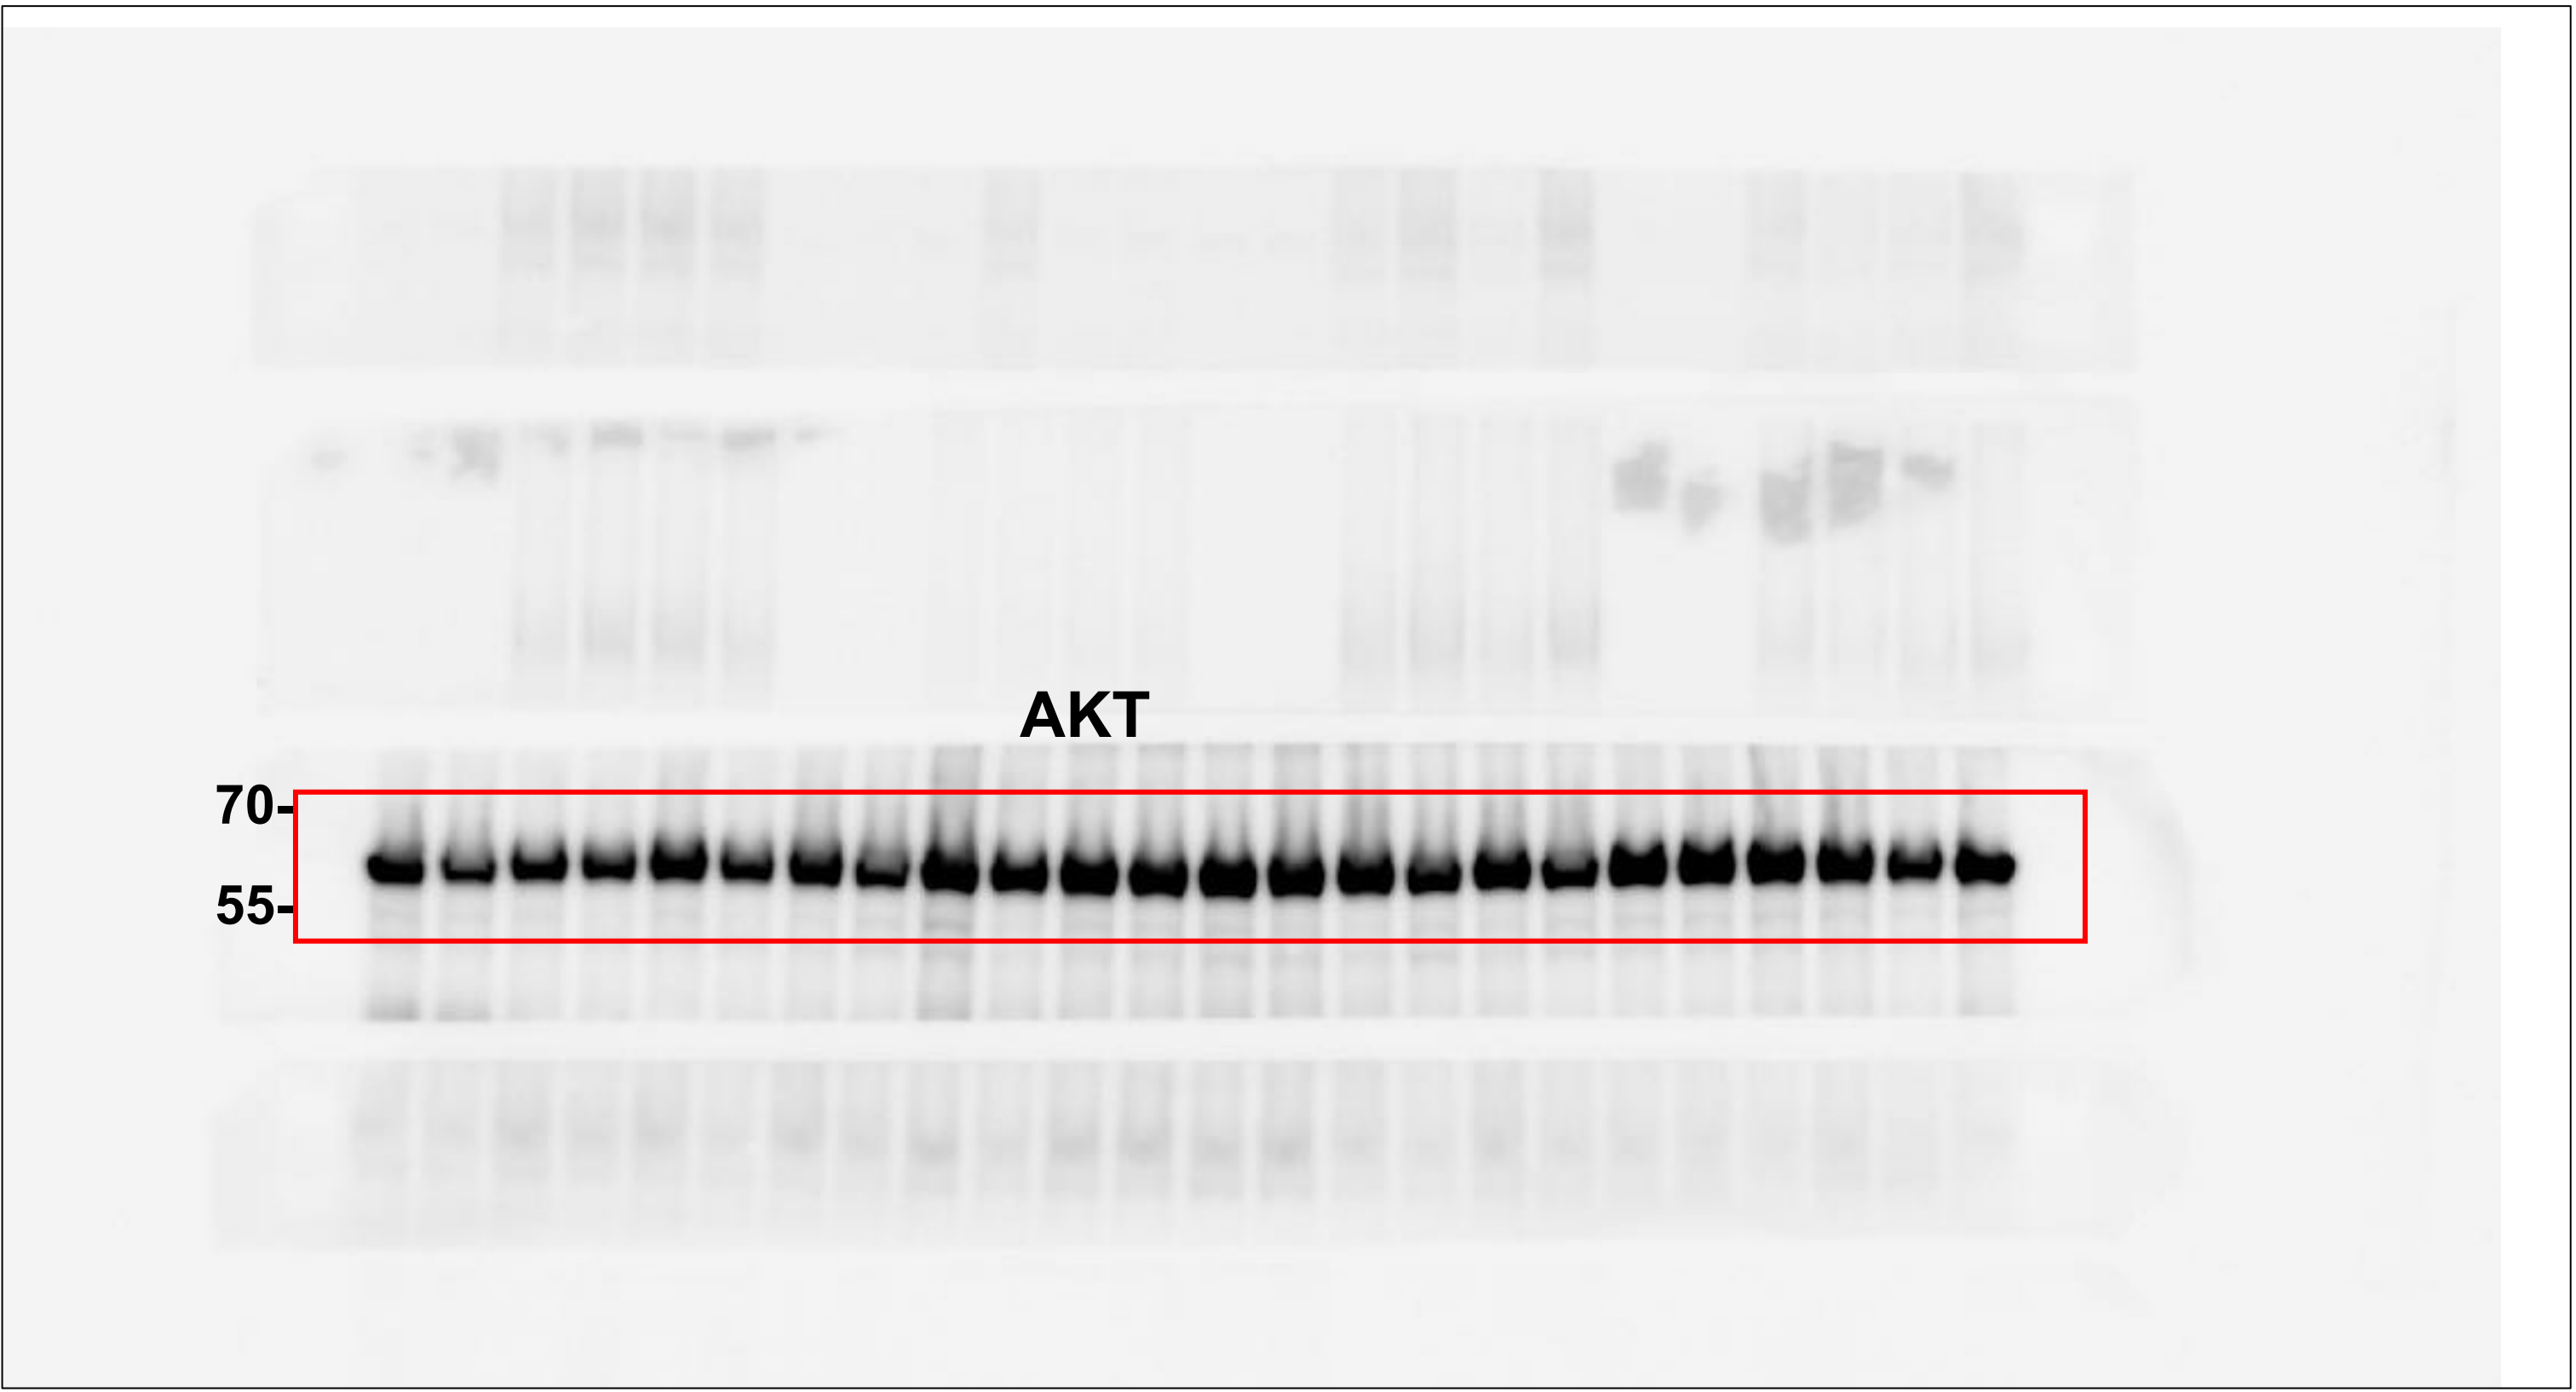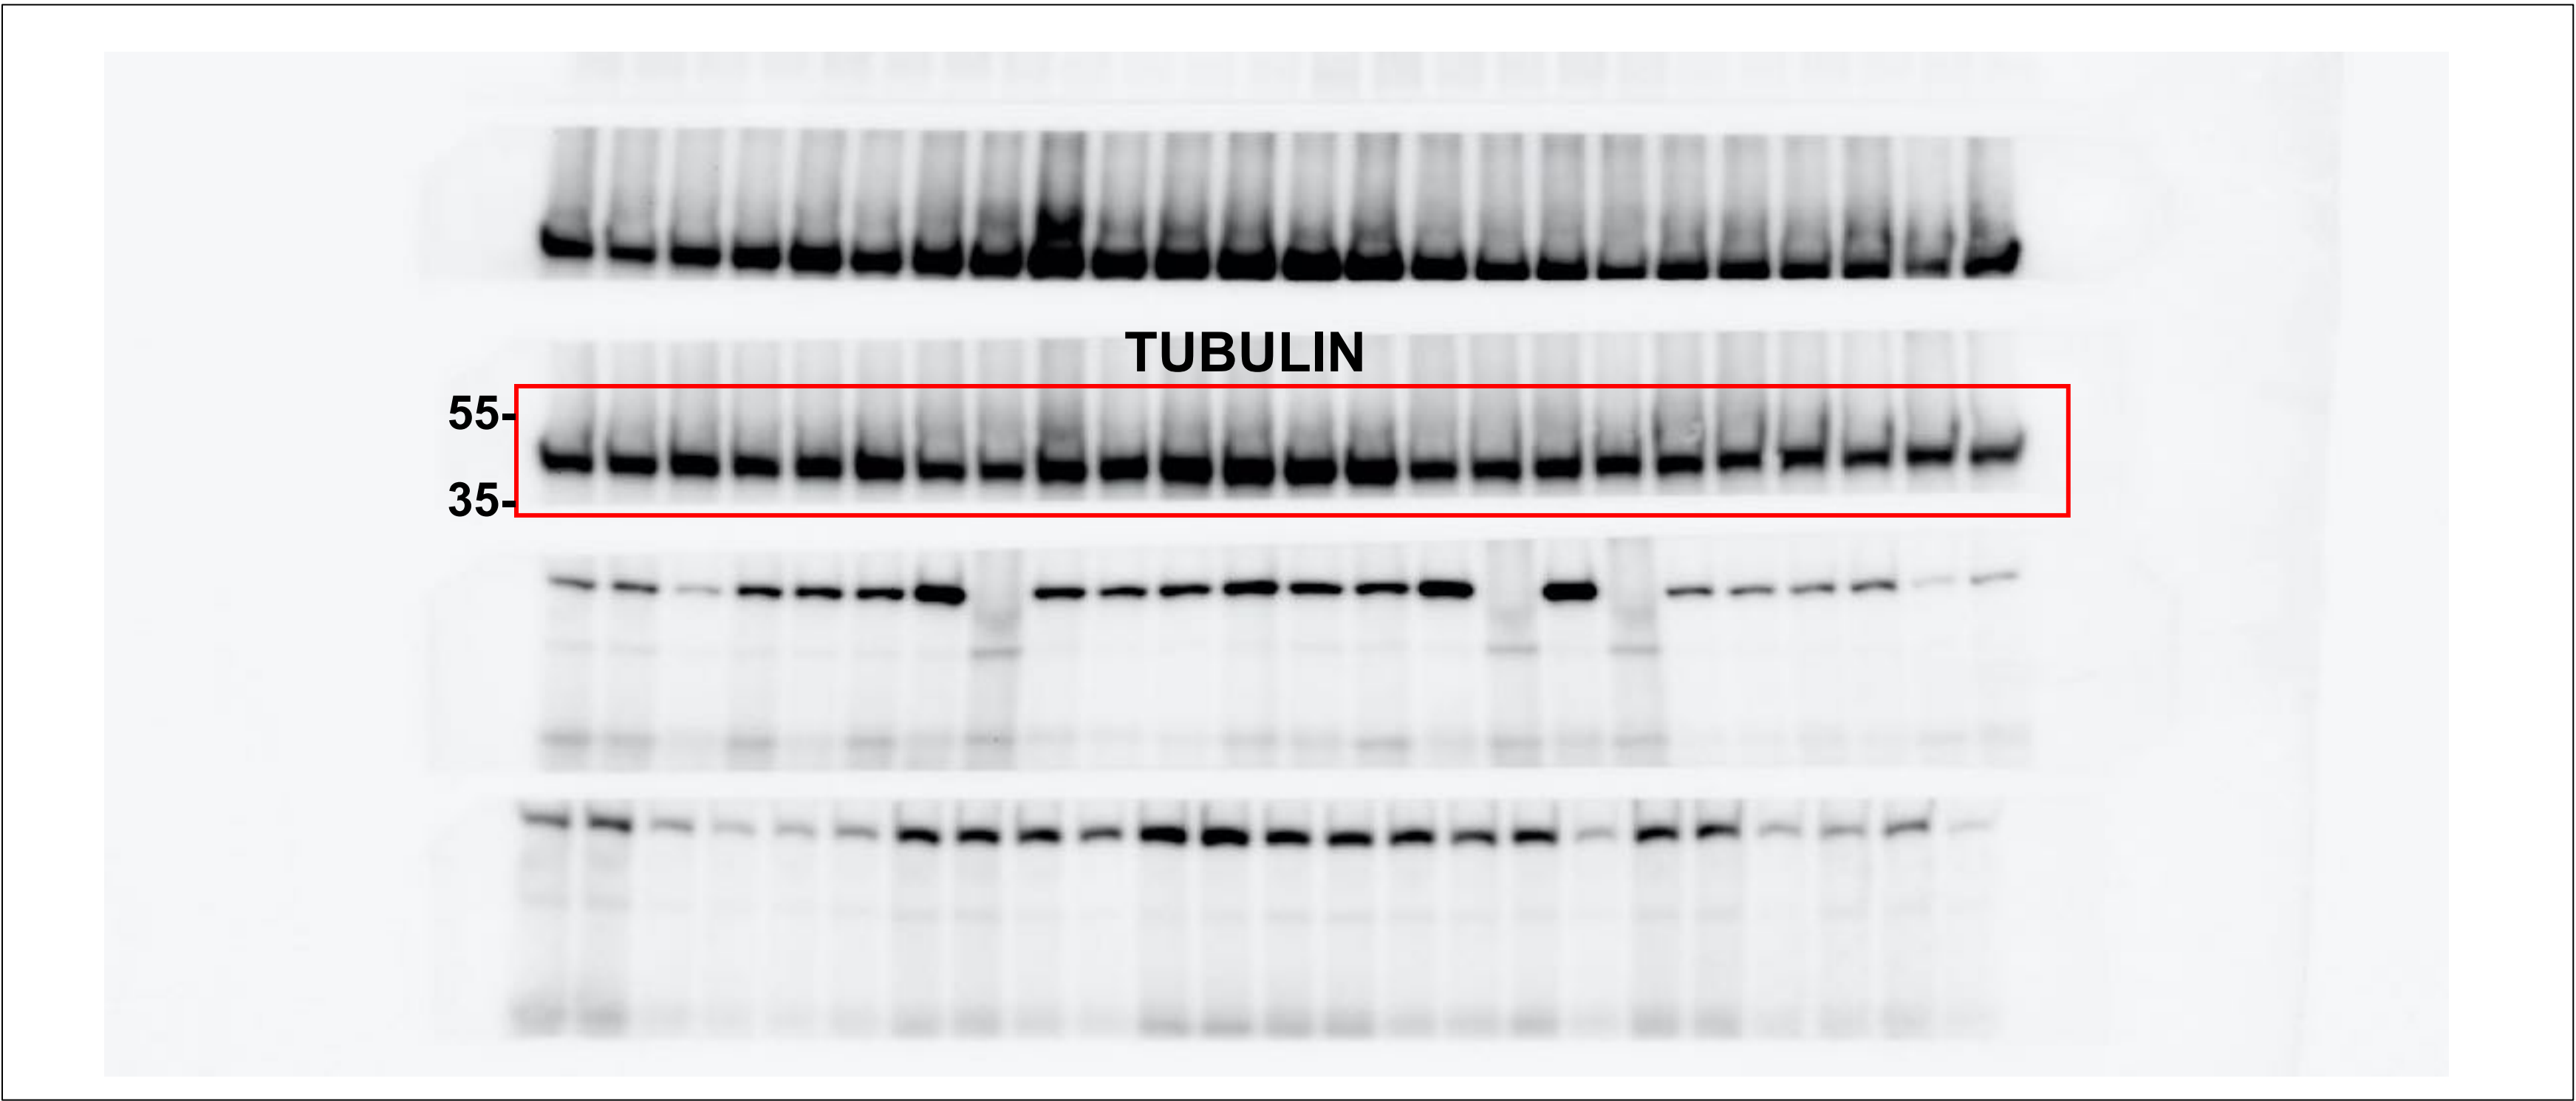

Supplement: MOESM4 [file uncropped WB for main figures.pdf › Source data/uncropped WB for main figures.pdf]
