# Supplementary material for: Divergent roles of m6A in orchestrating brown and white adipocyte transcriptomes and systemic metabolism
Source: Springer Nature journal article supplement (doi:10.1038/s41467-024-55694-w), 2025-01-09

## **Uncropped Western Blots for Supplementary Figures**

Supplementary Figure 1

f

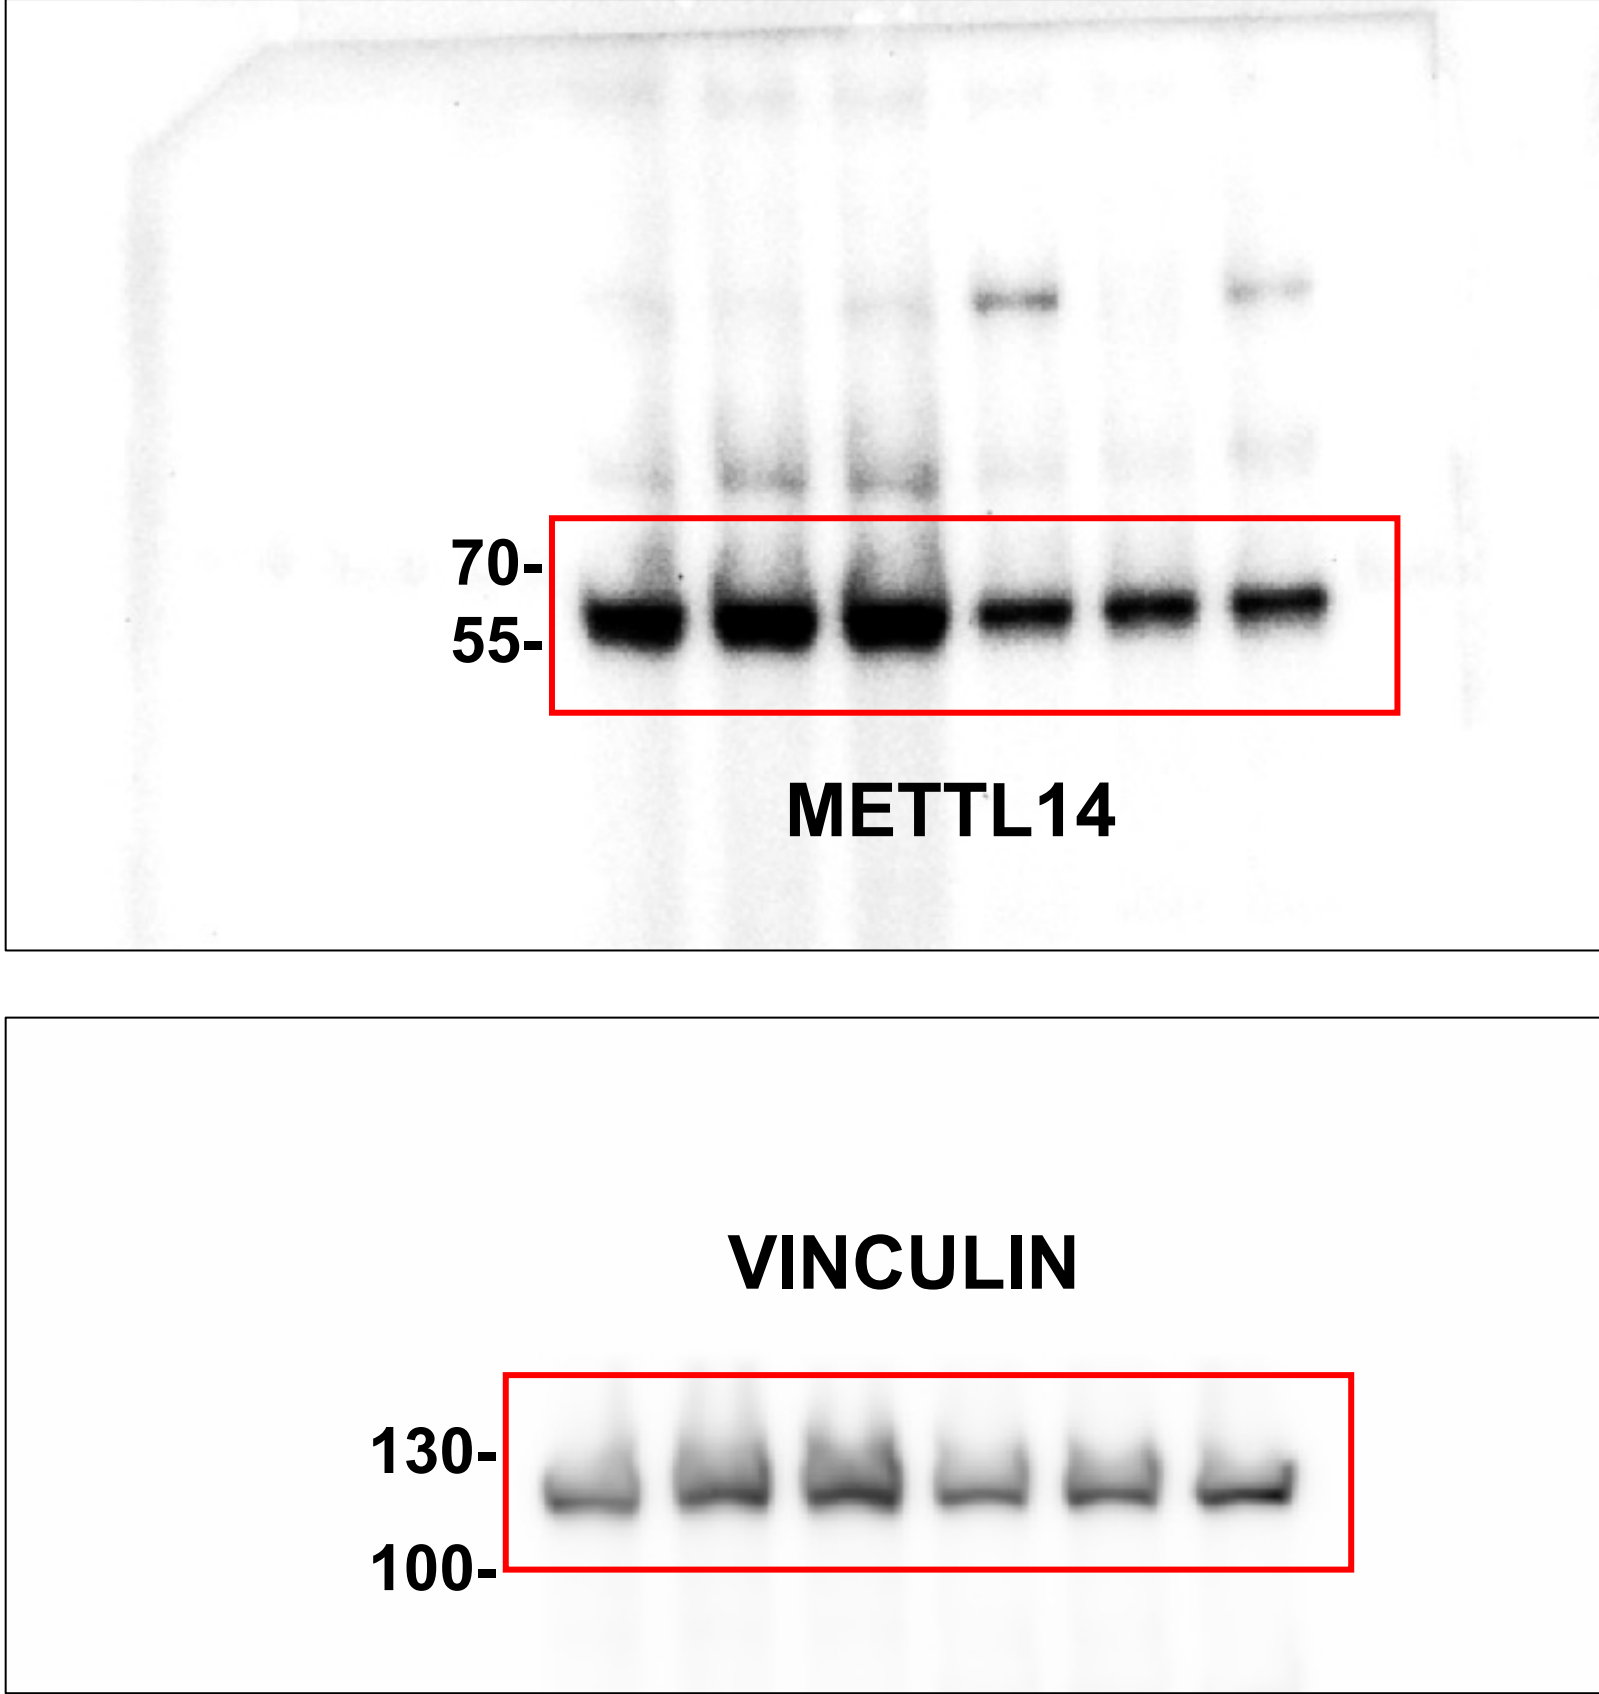

h

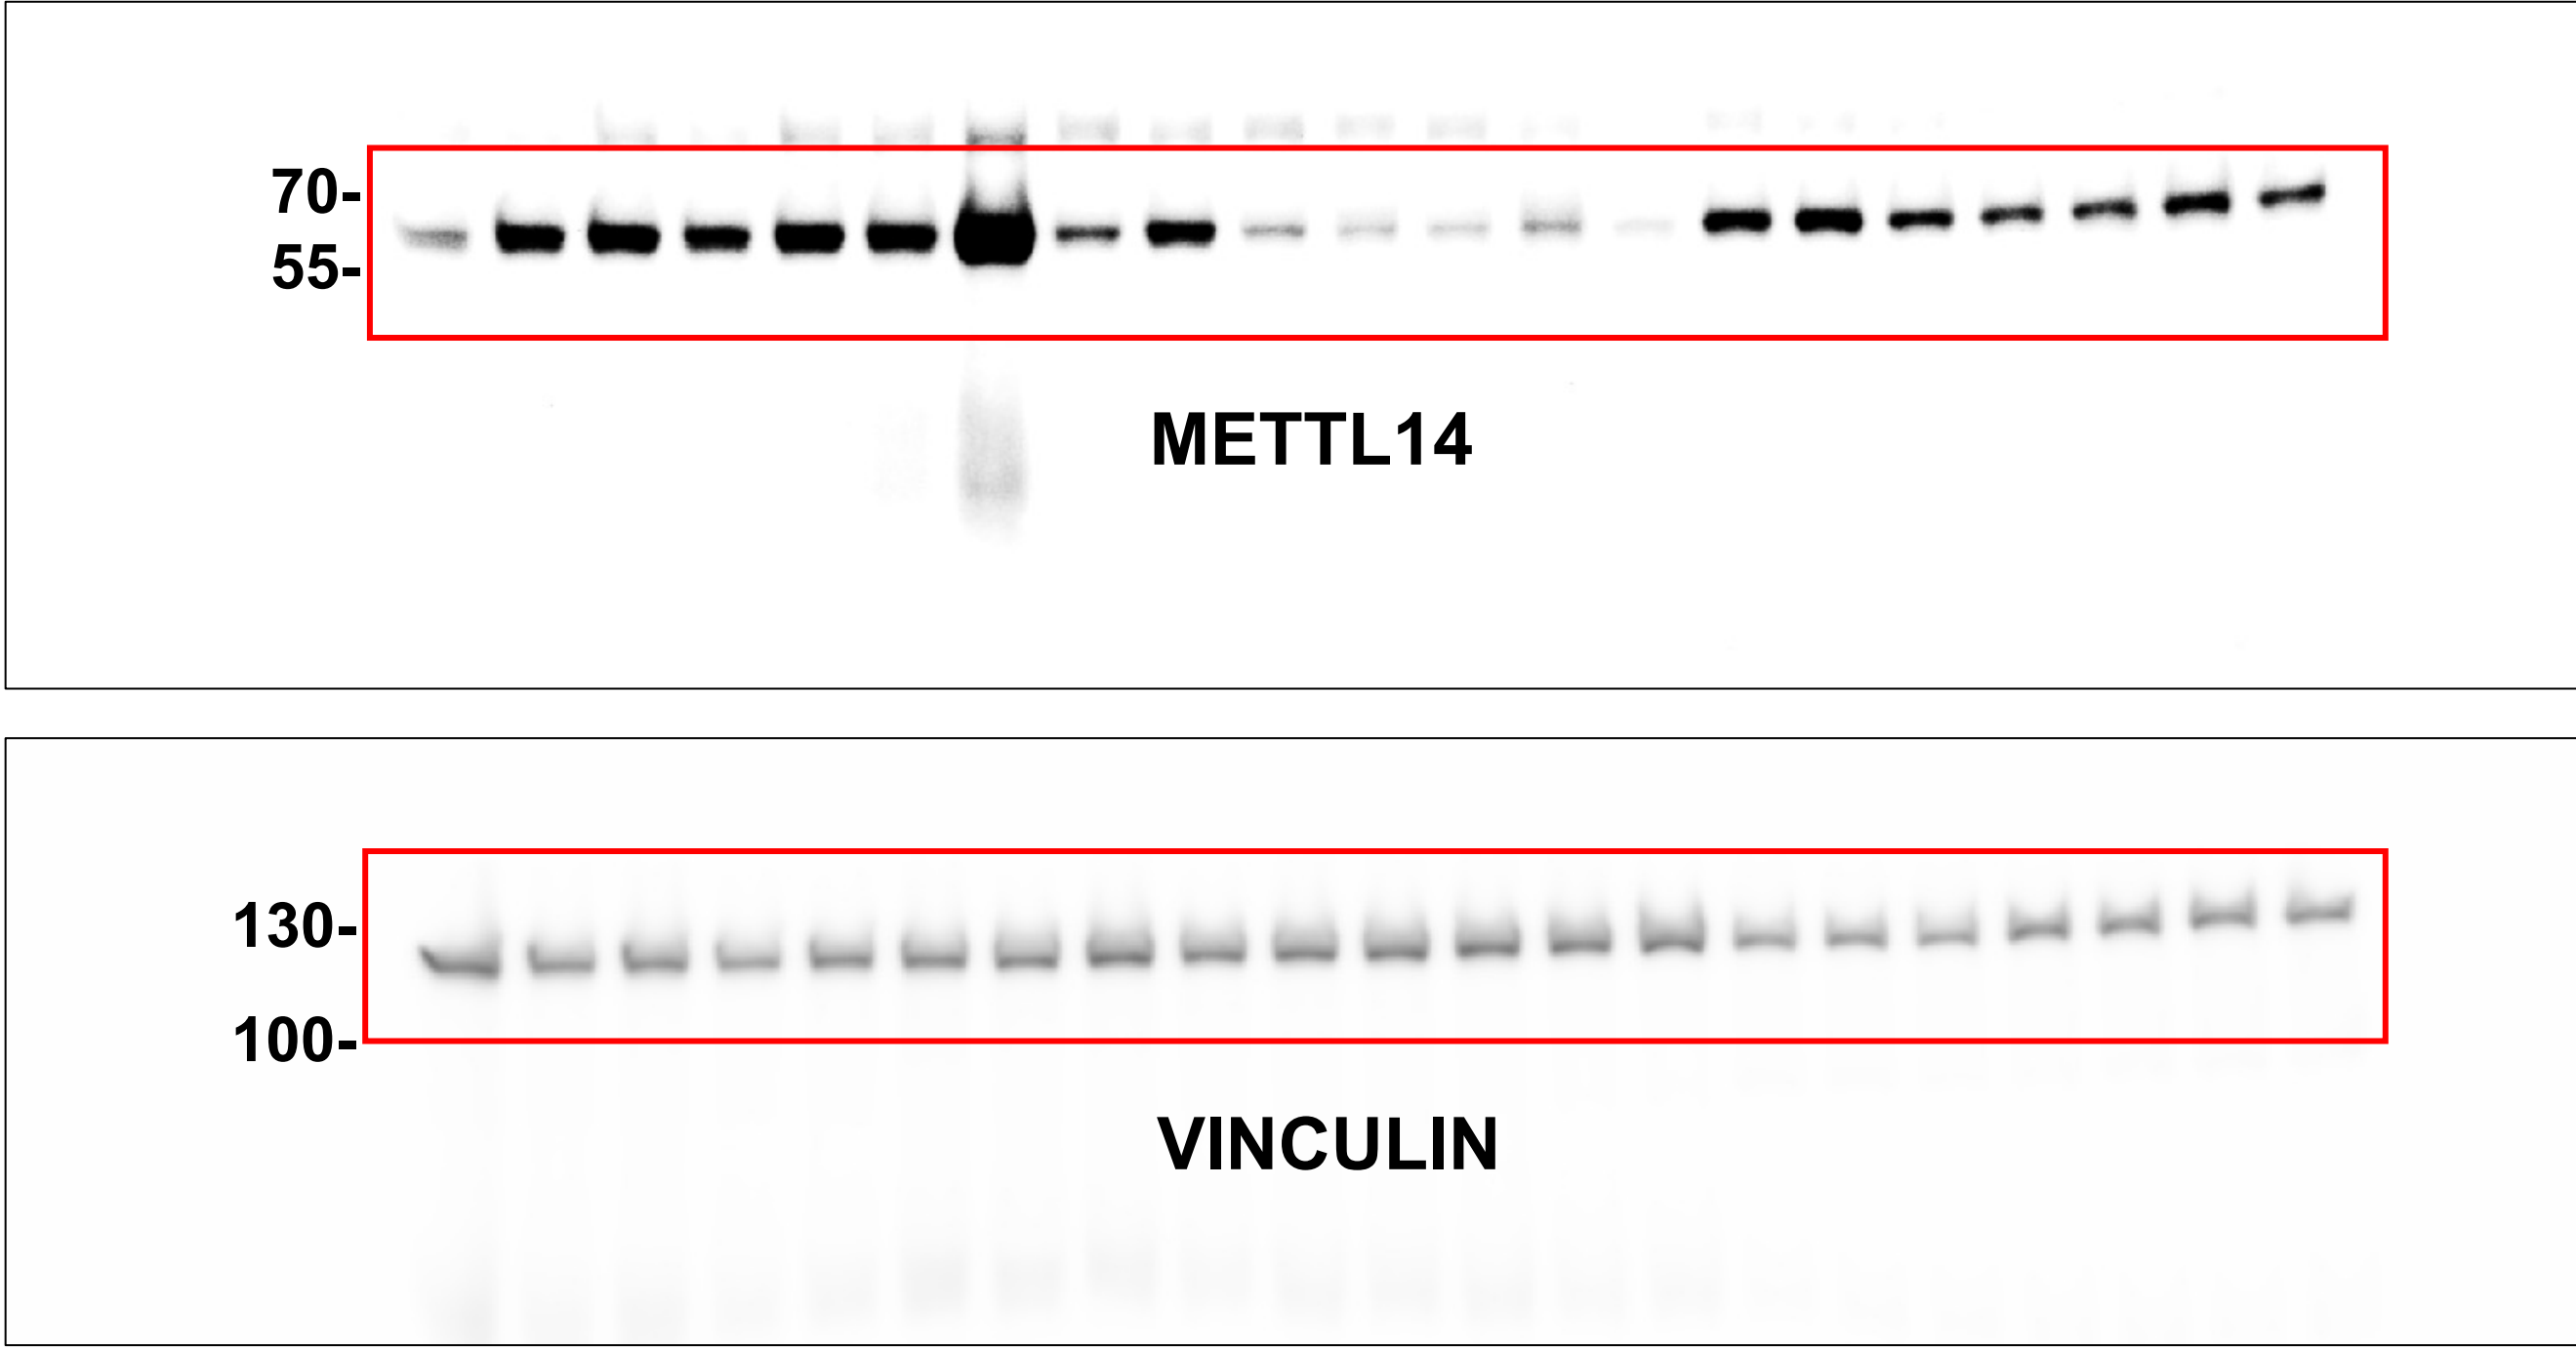

j

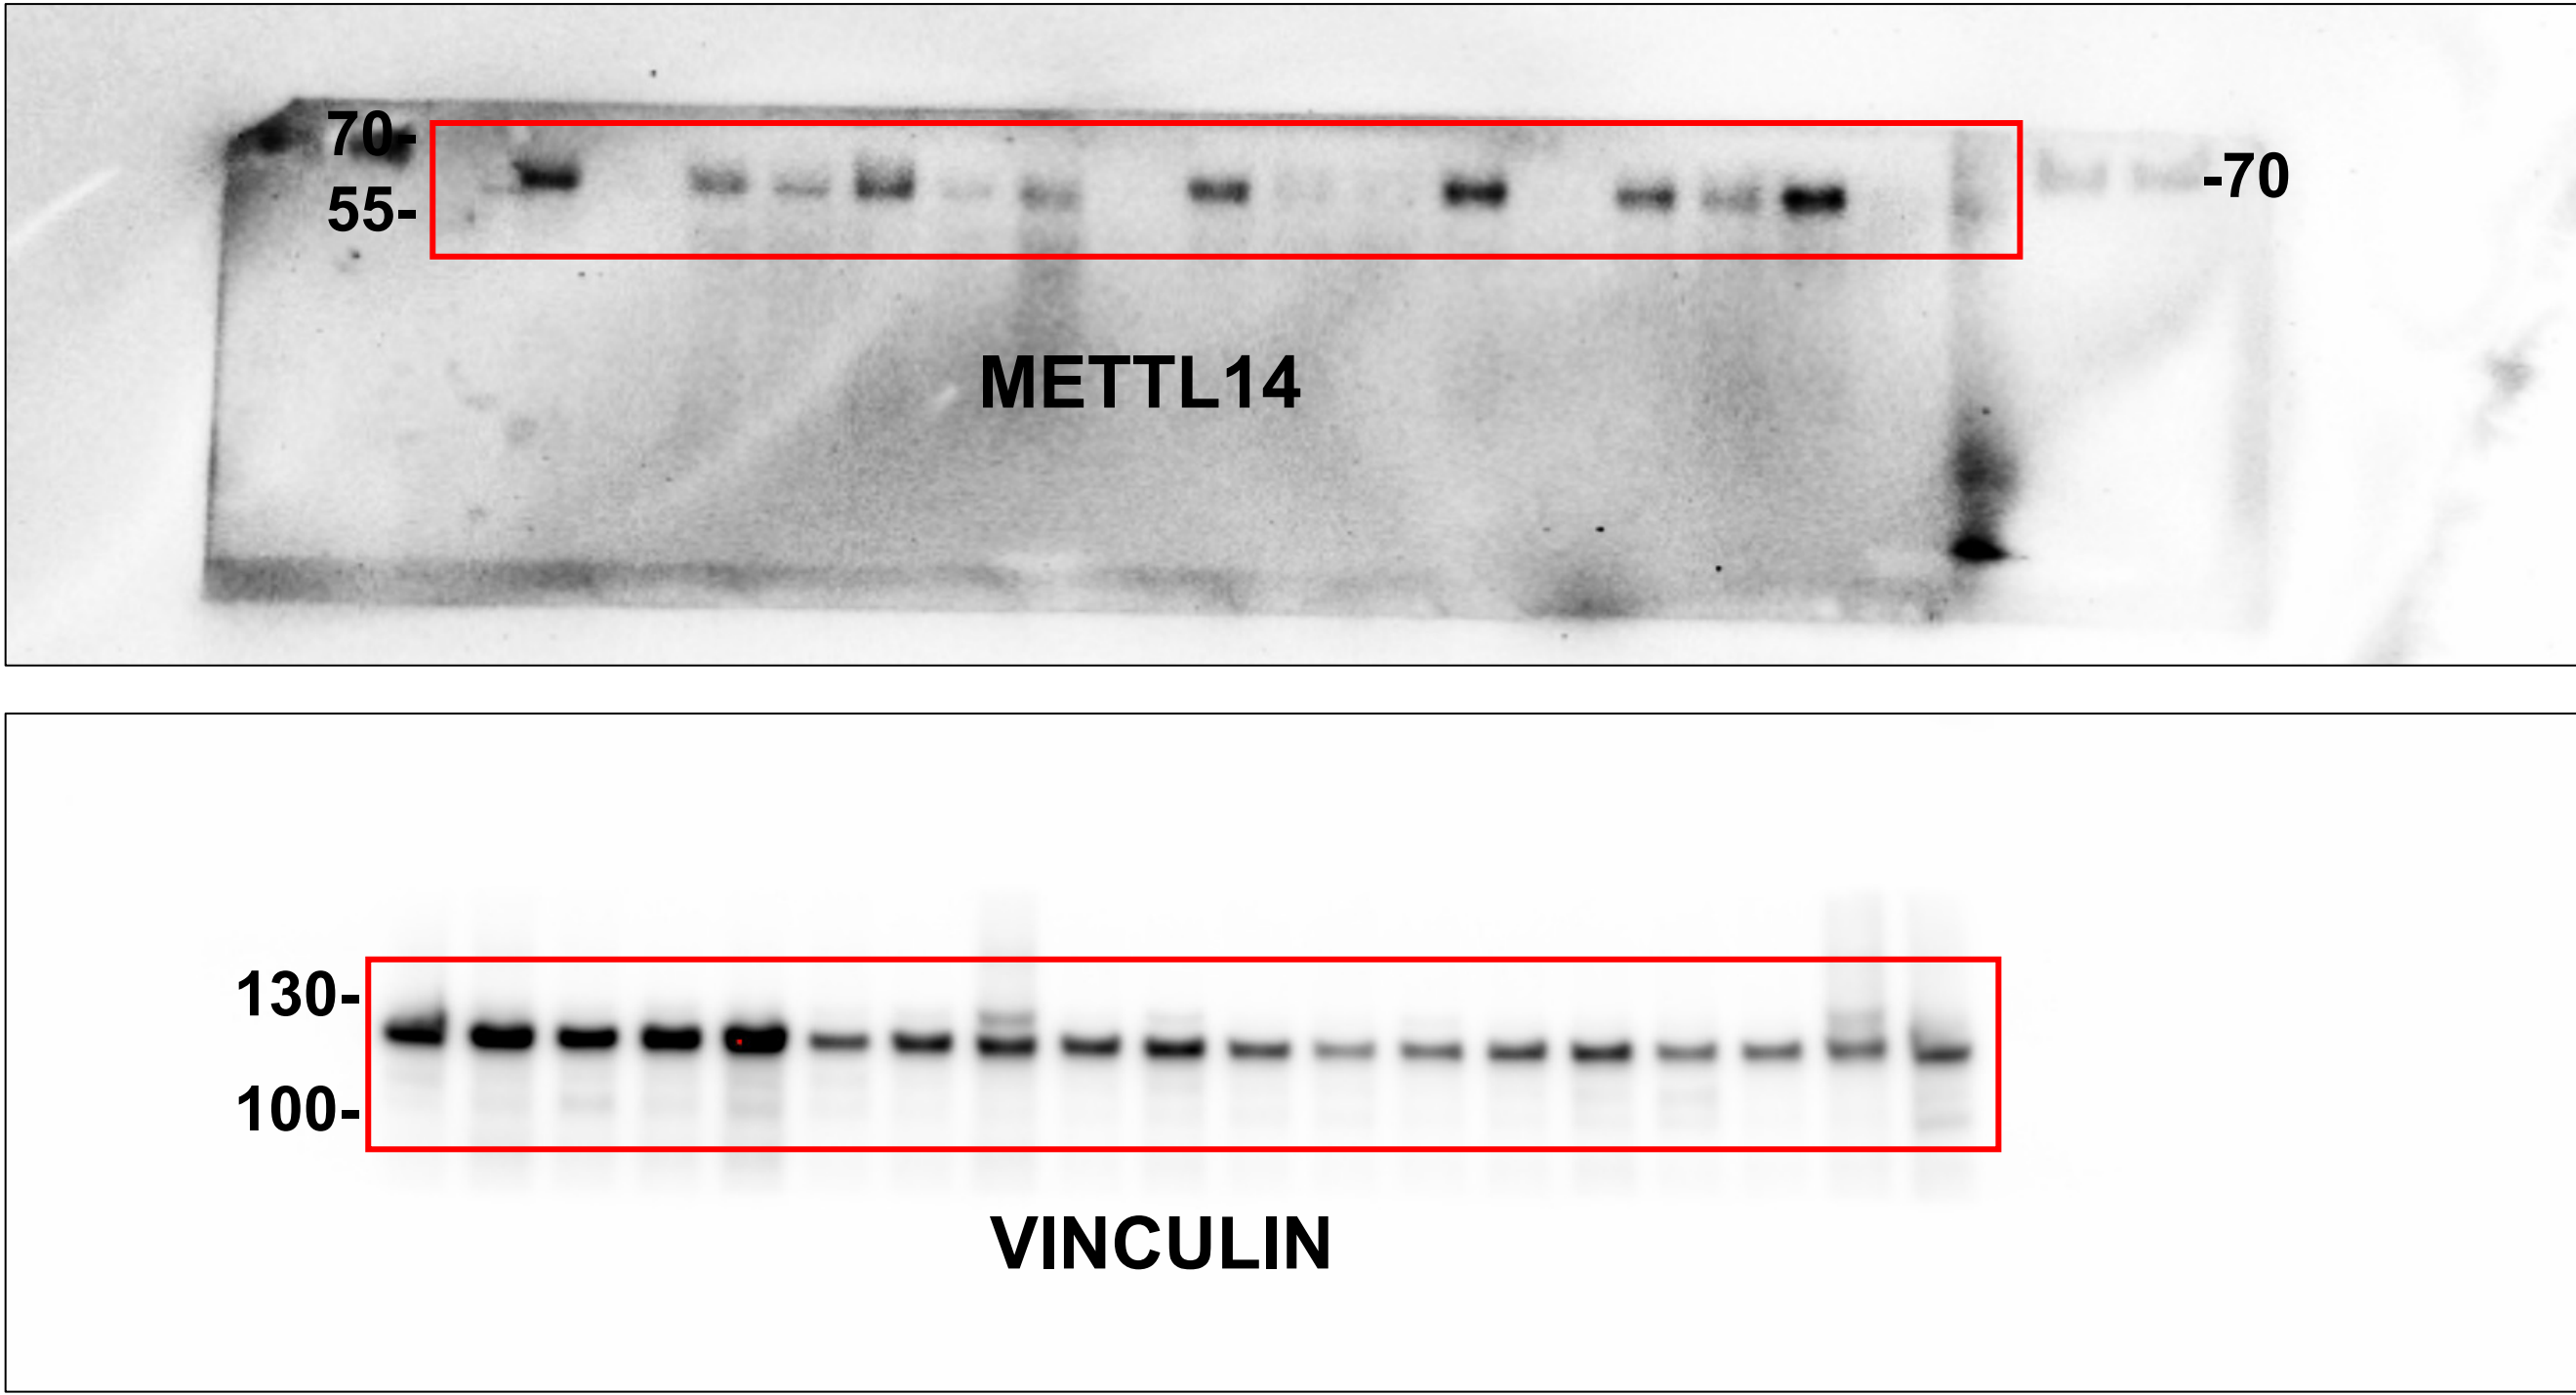

l

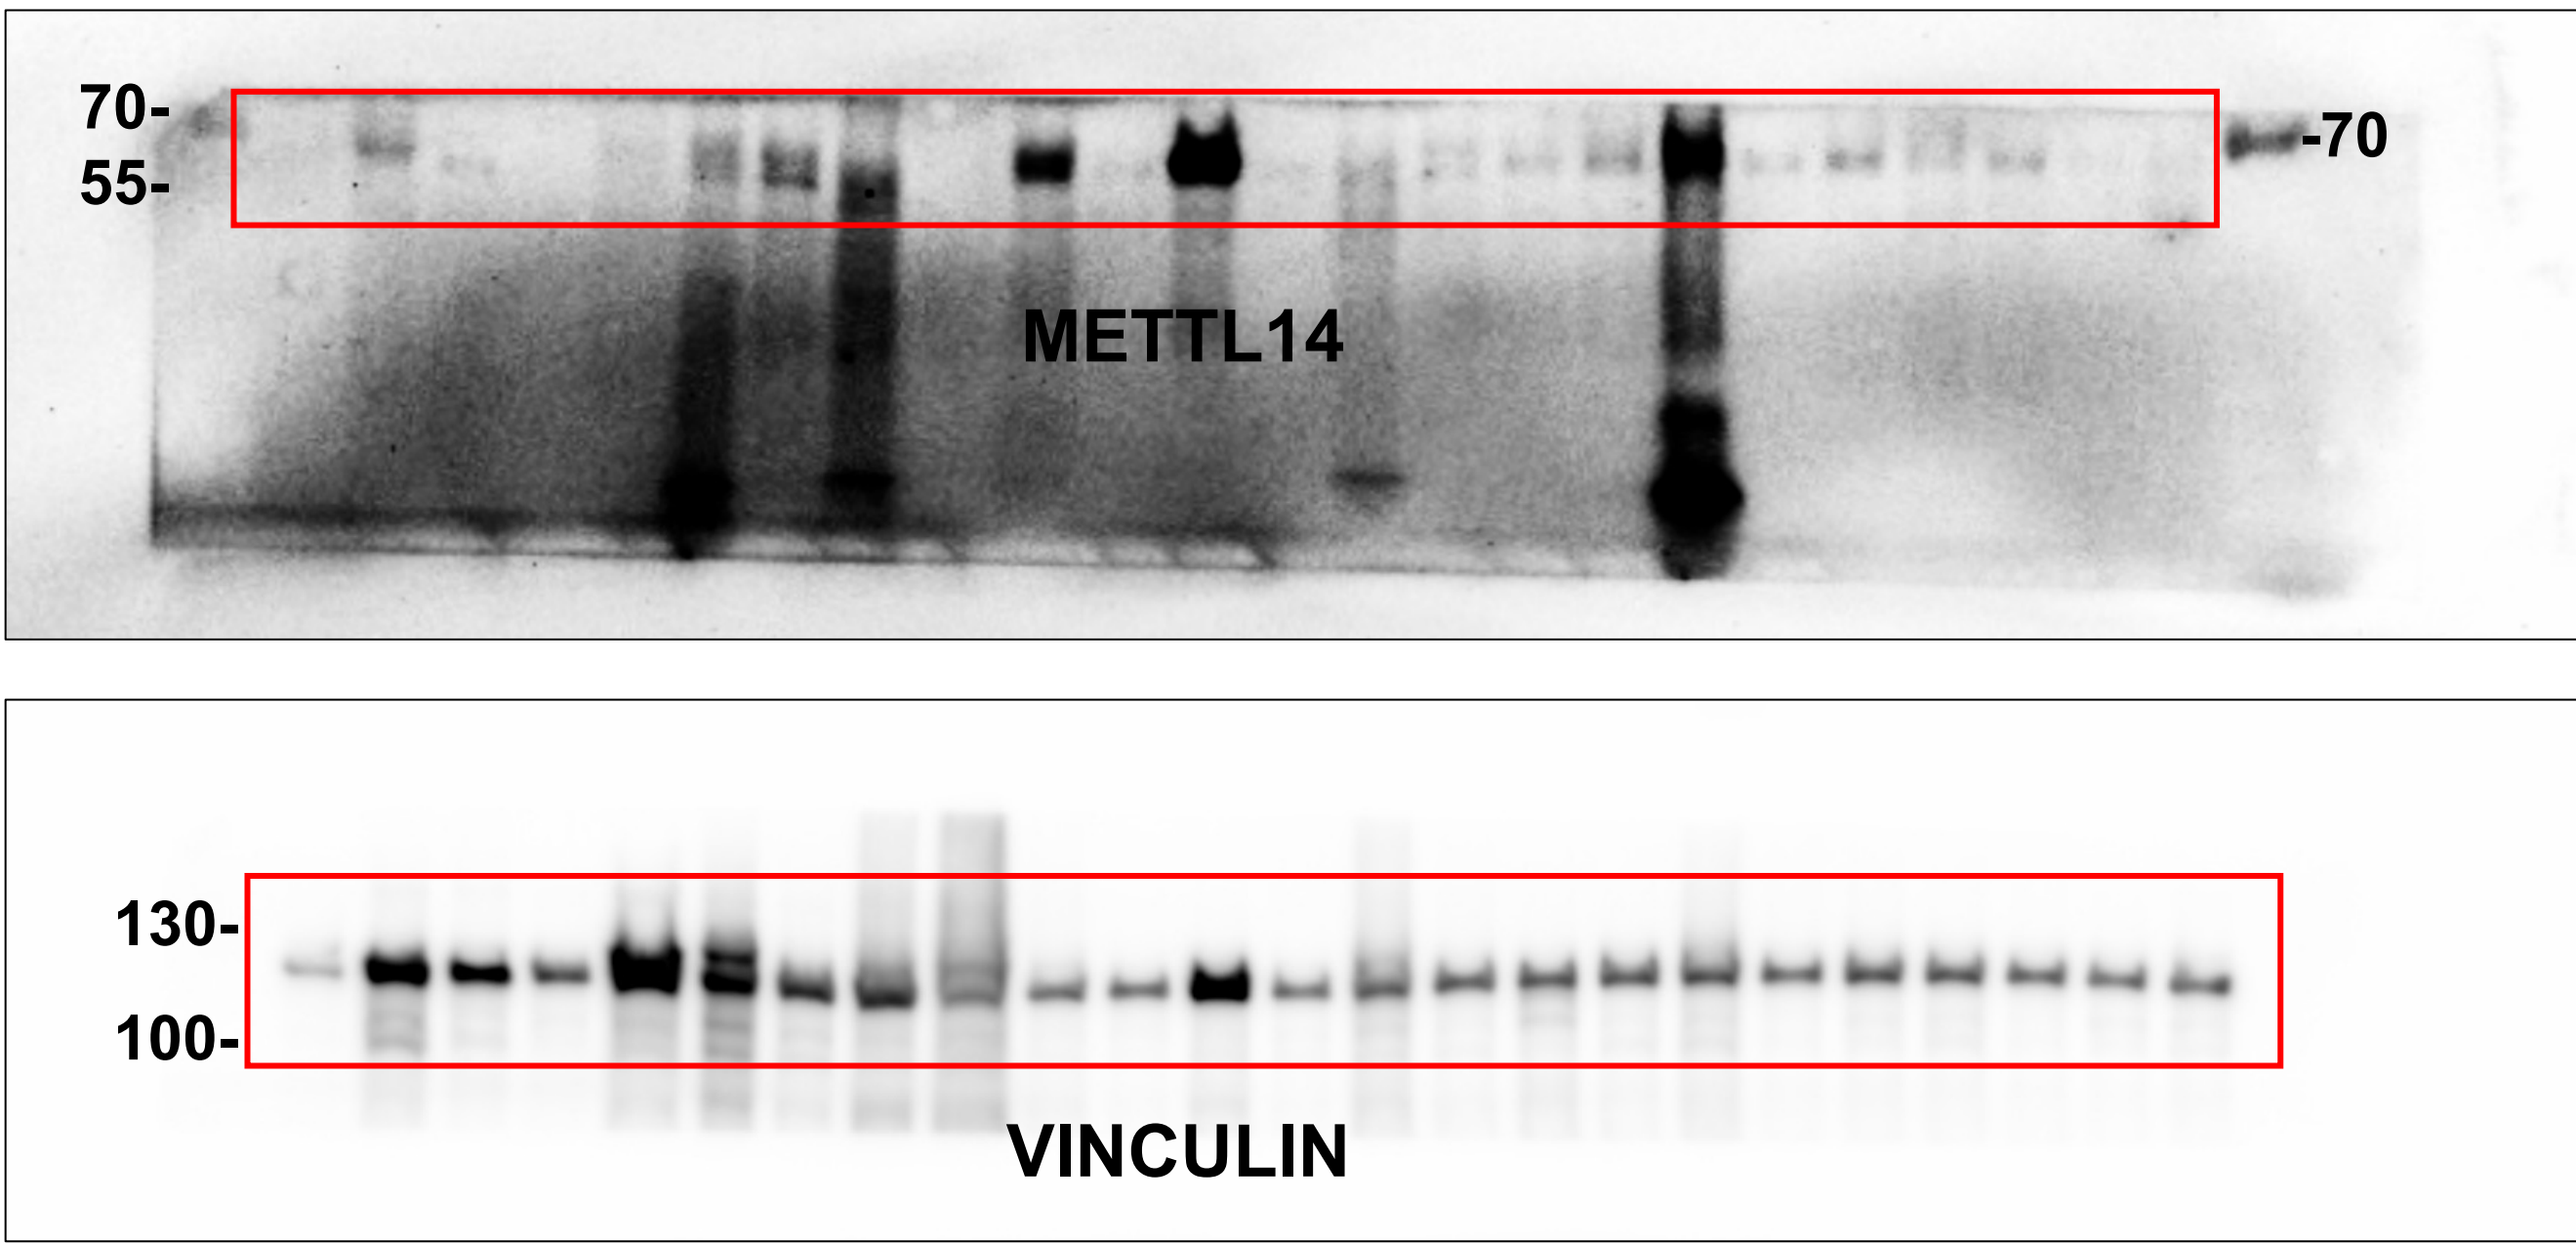



Supplementary Figure 2

a

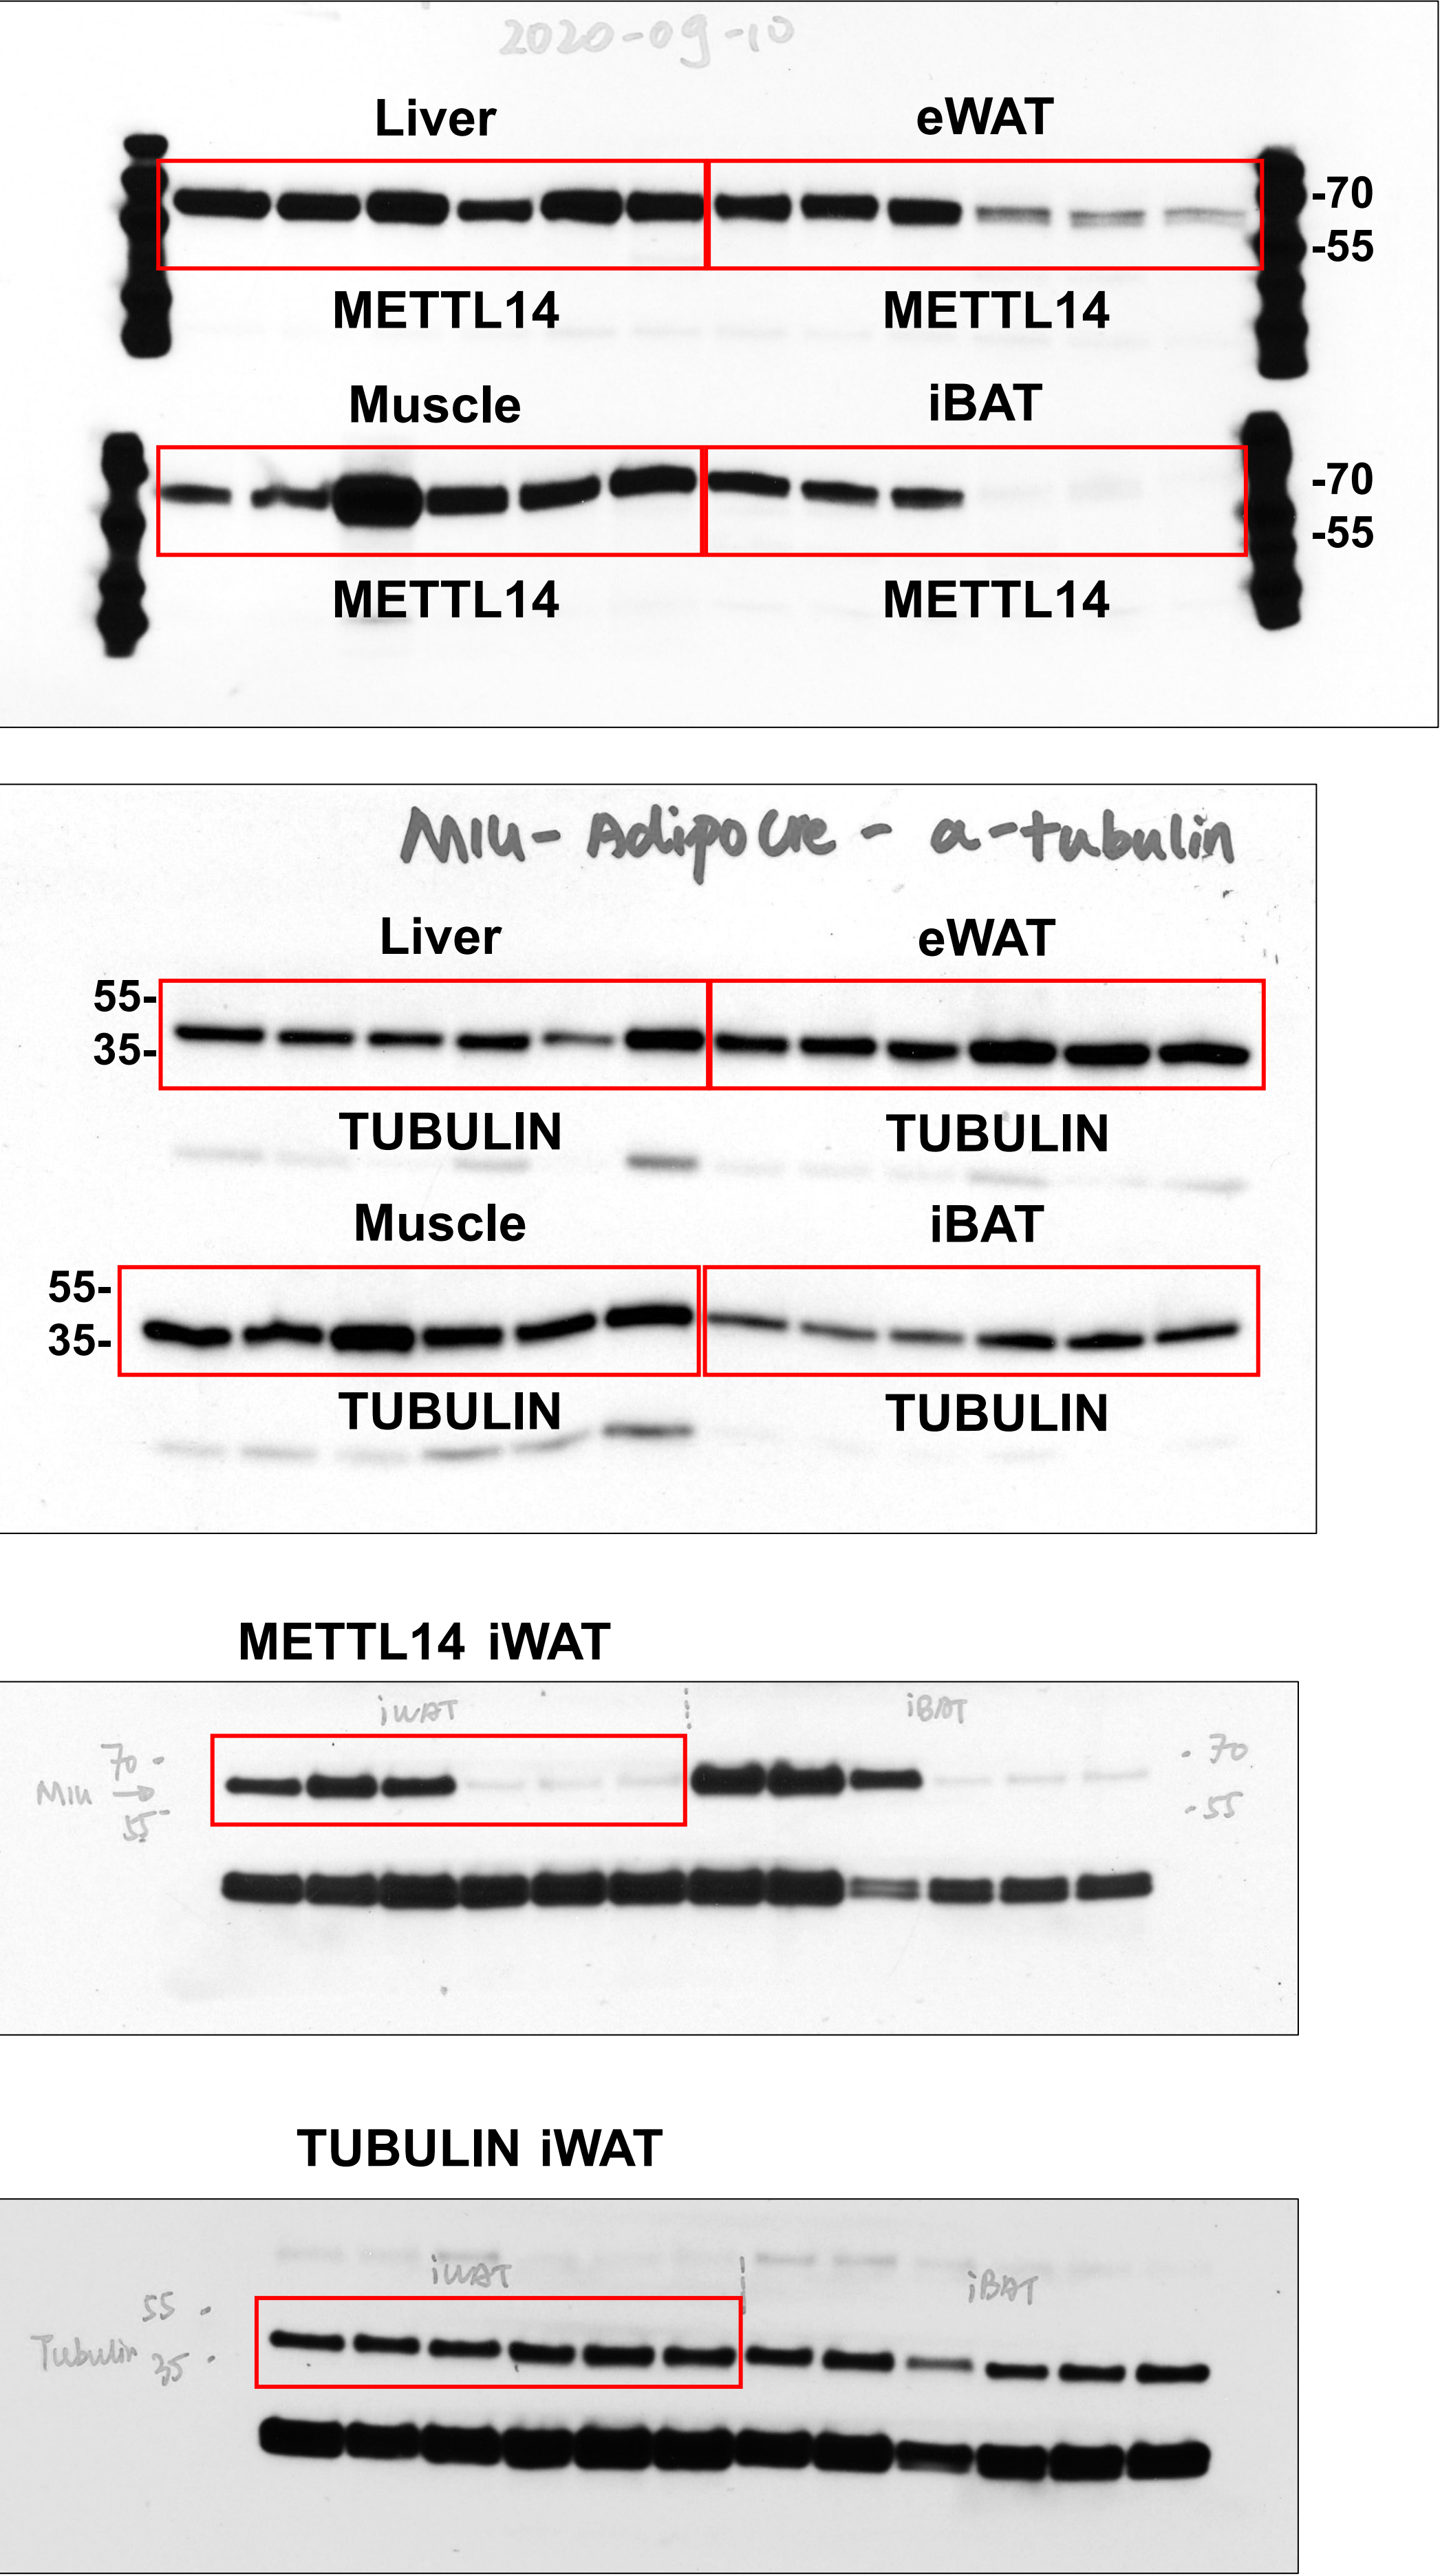

b

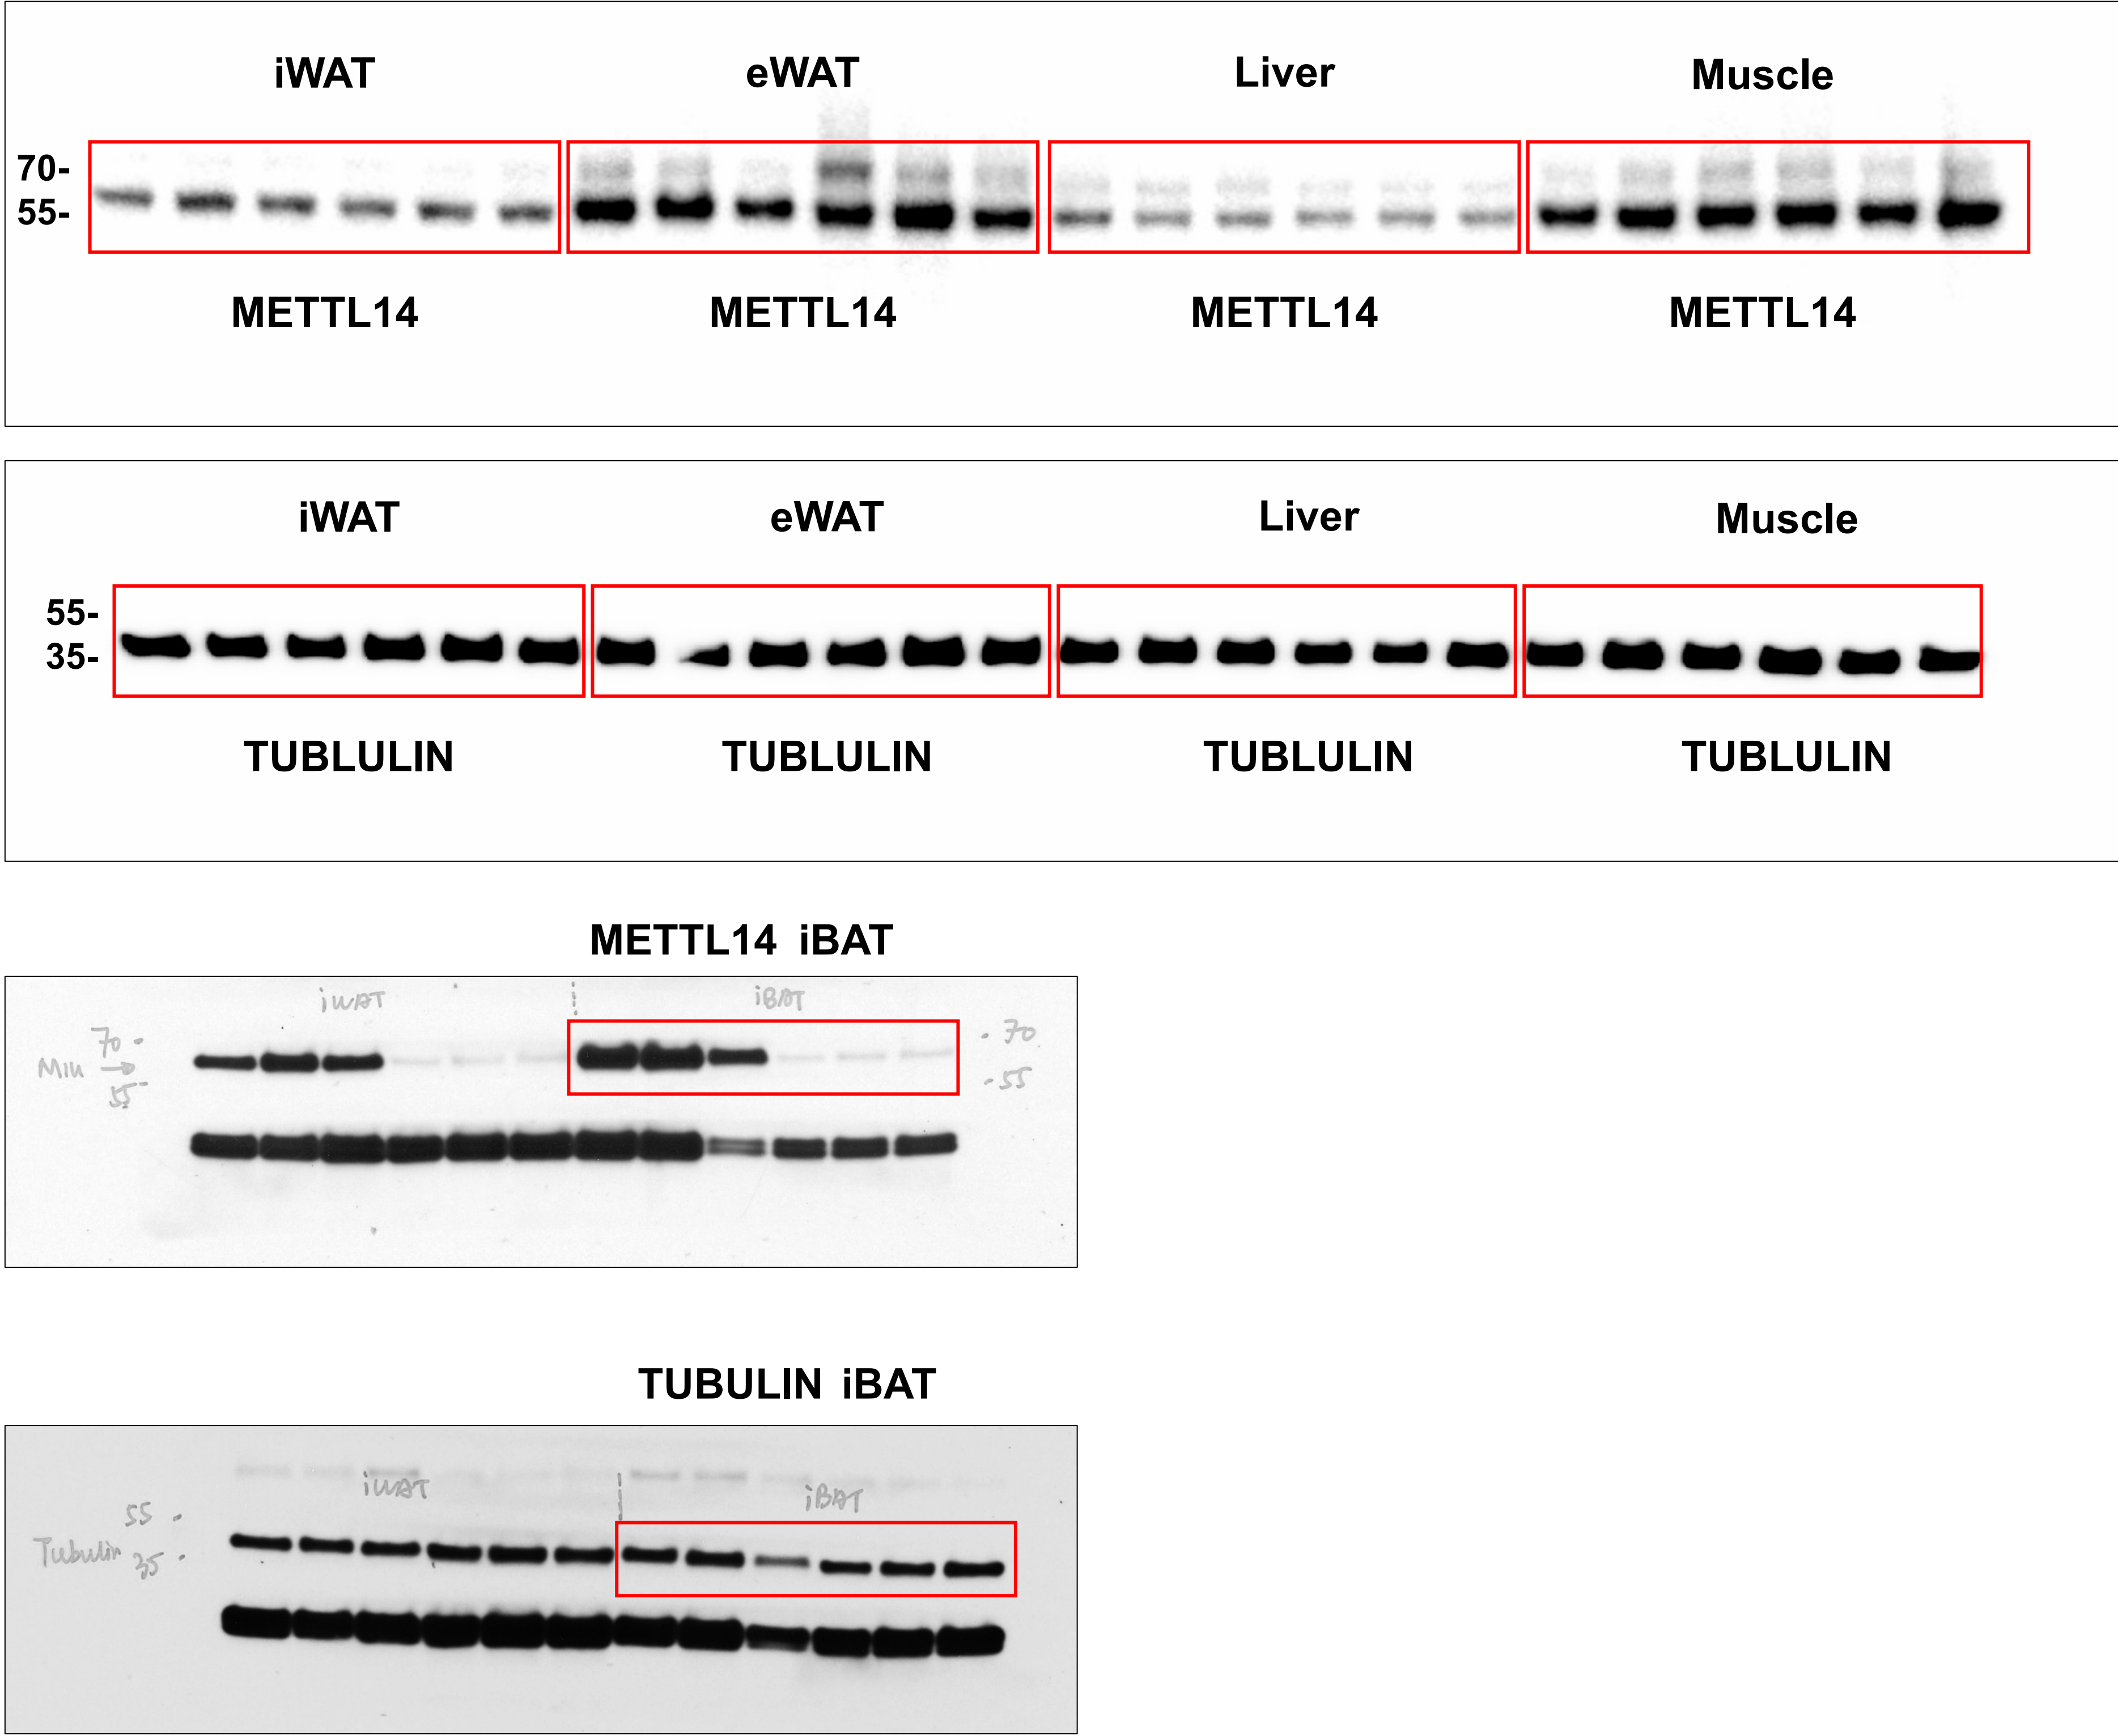



Supplementary Figure 4

a

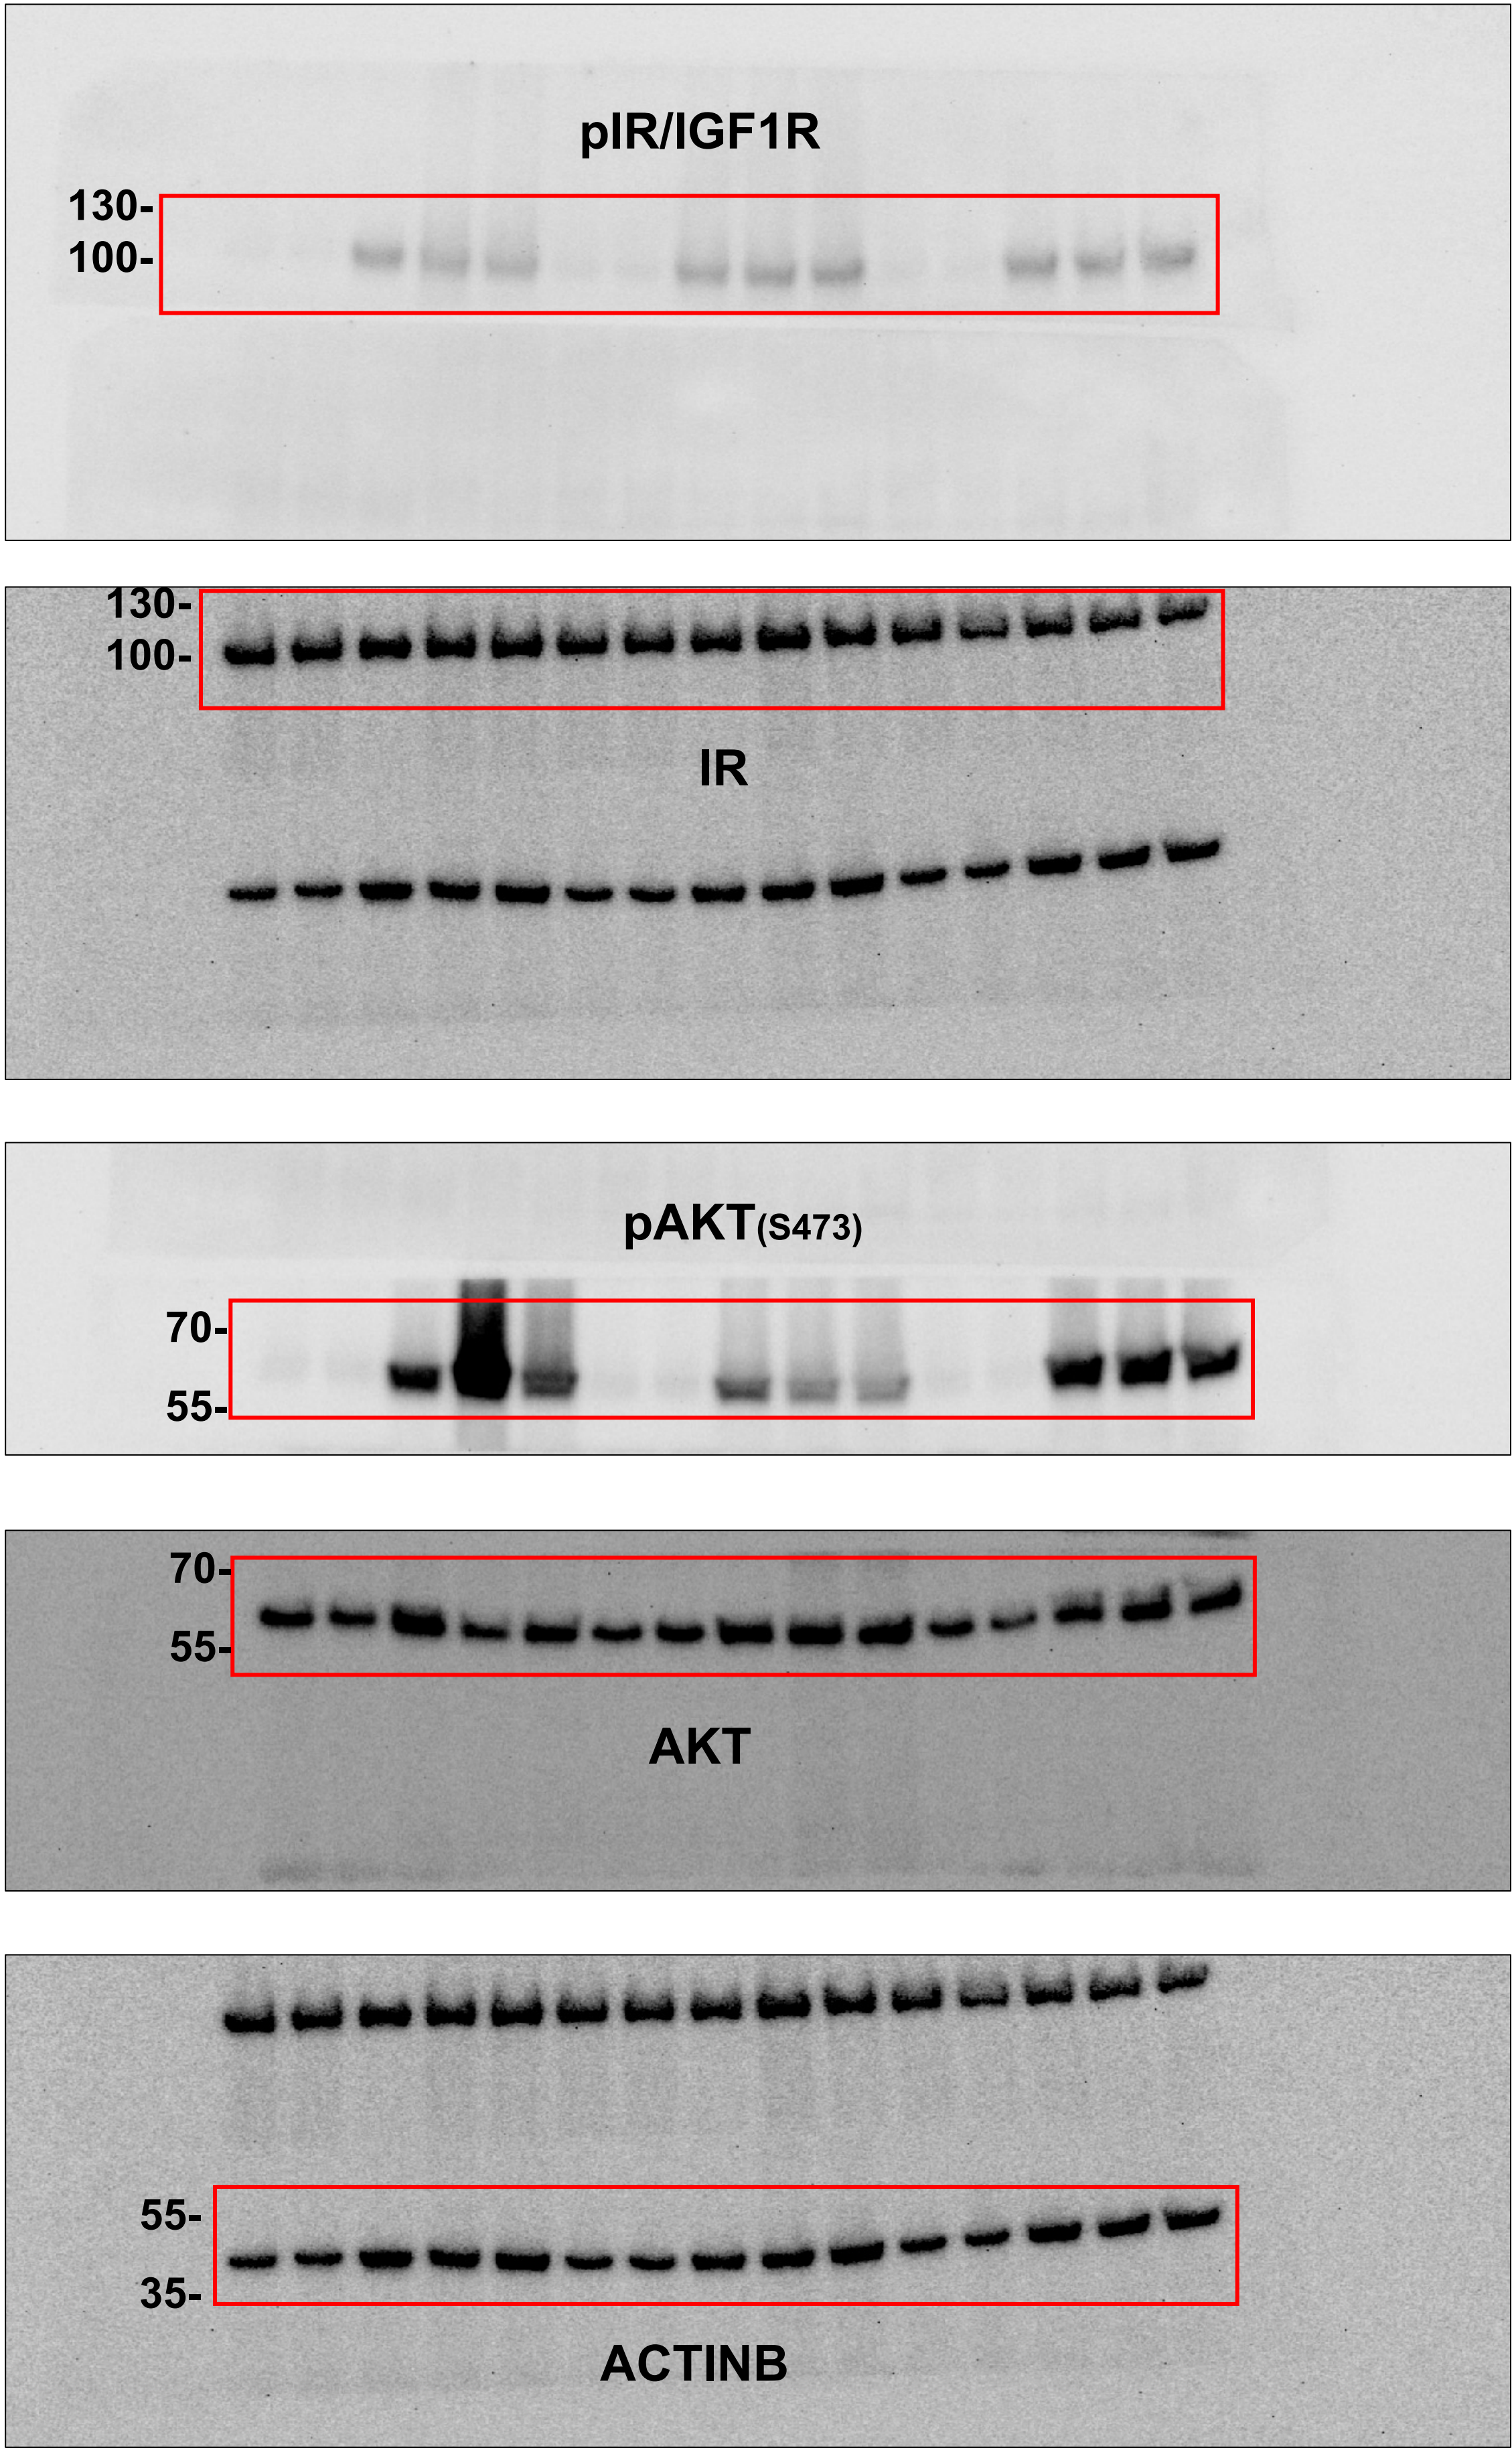

b

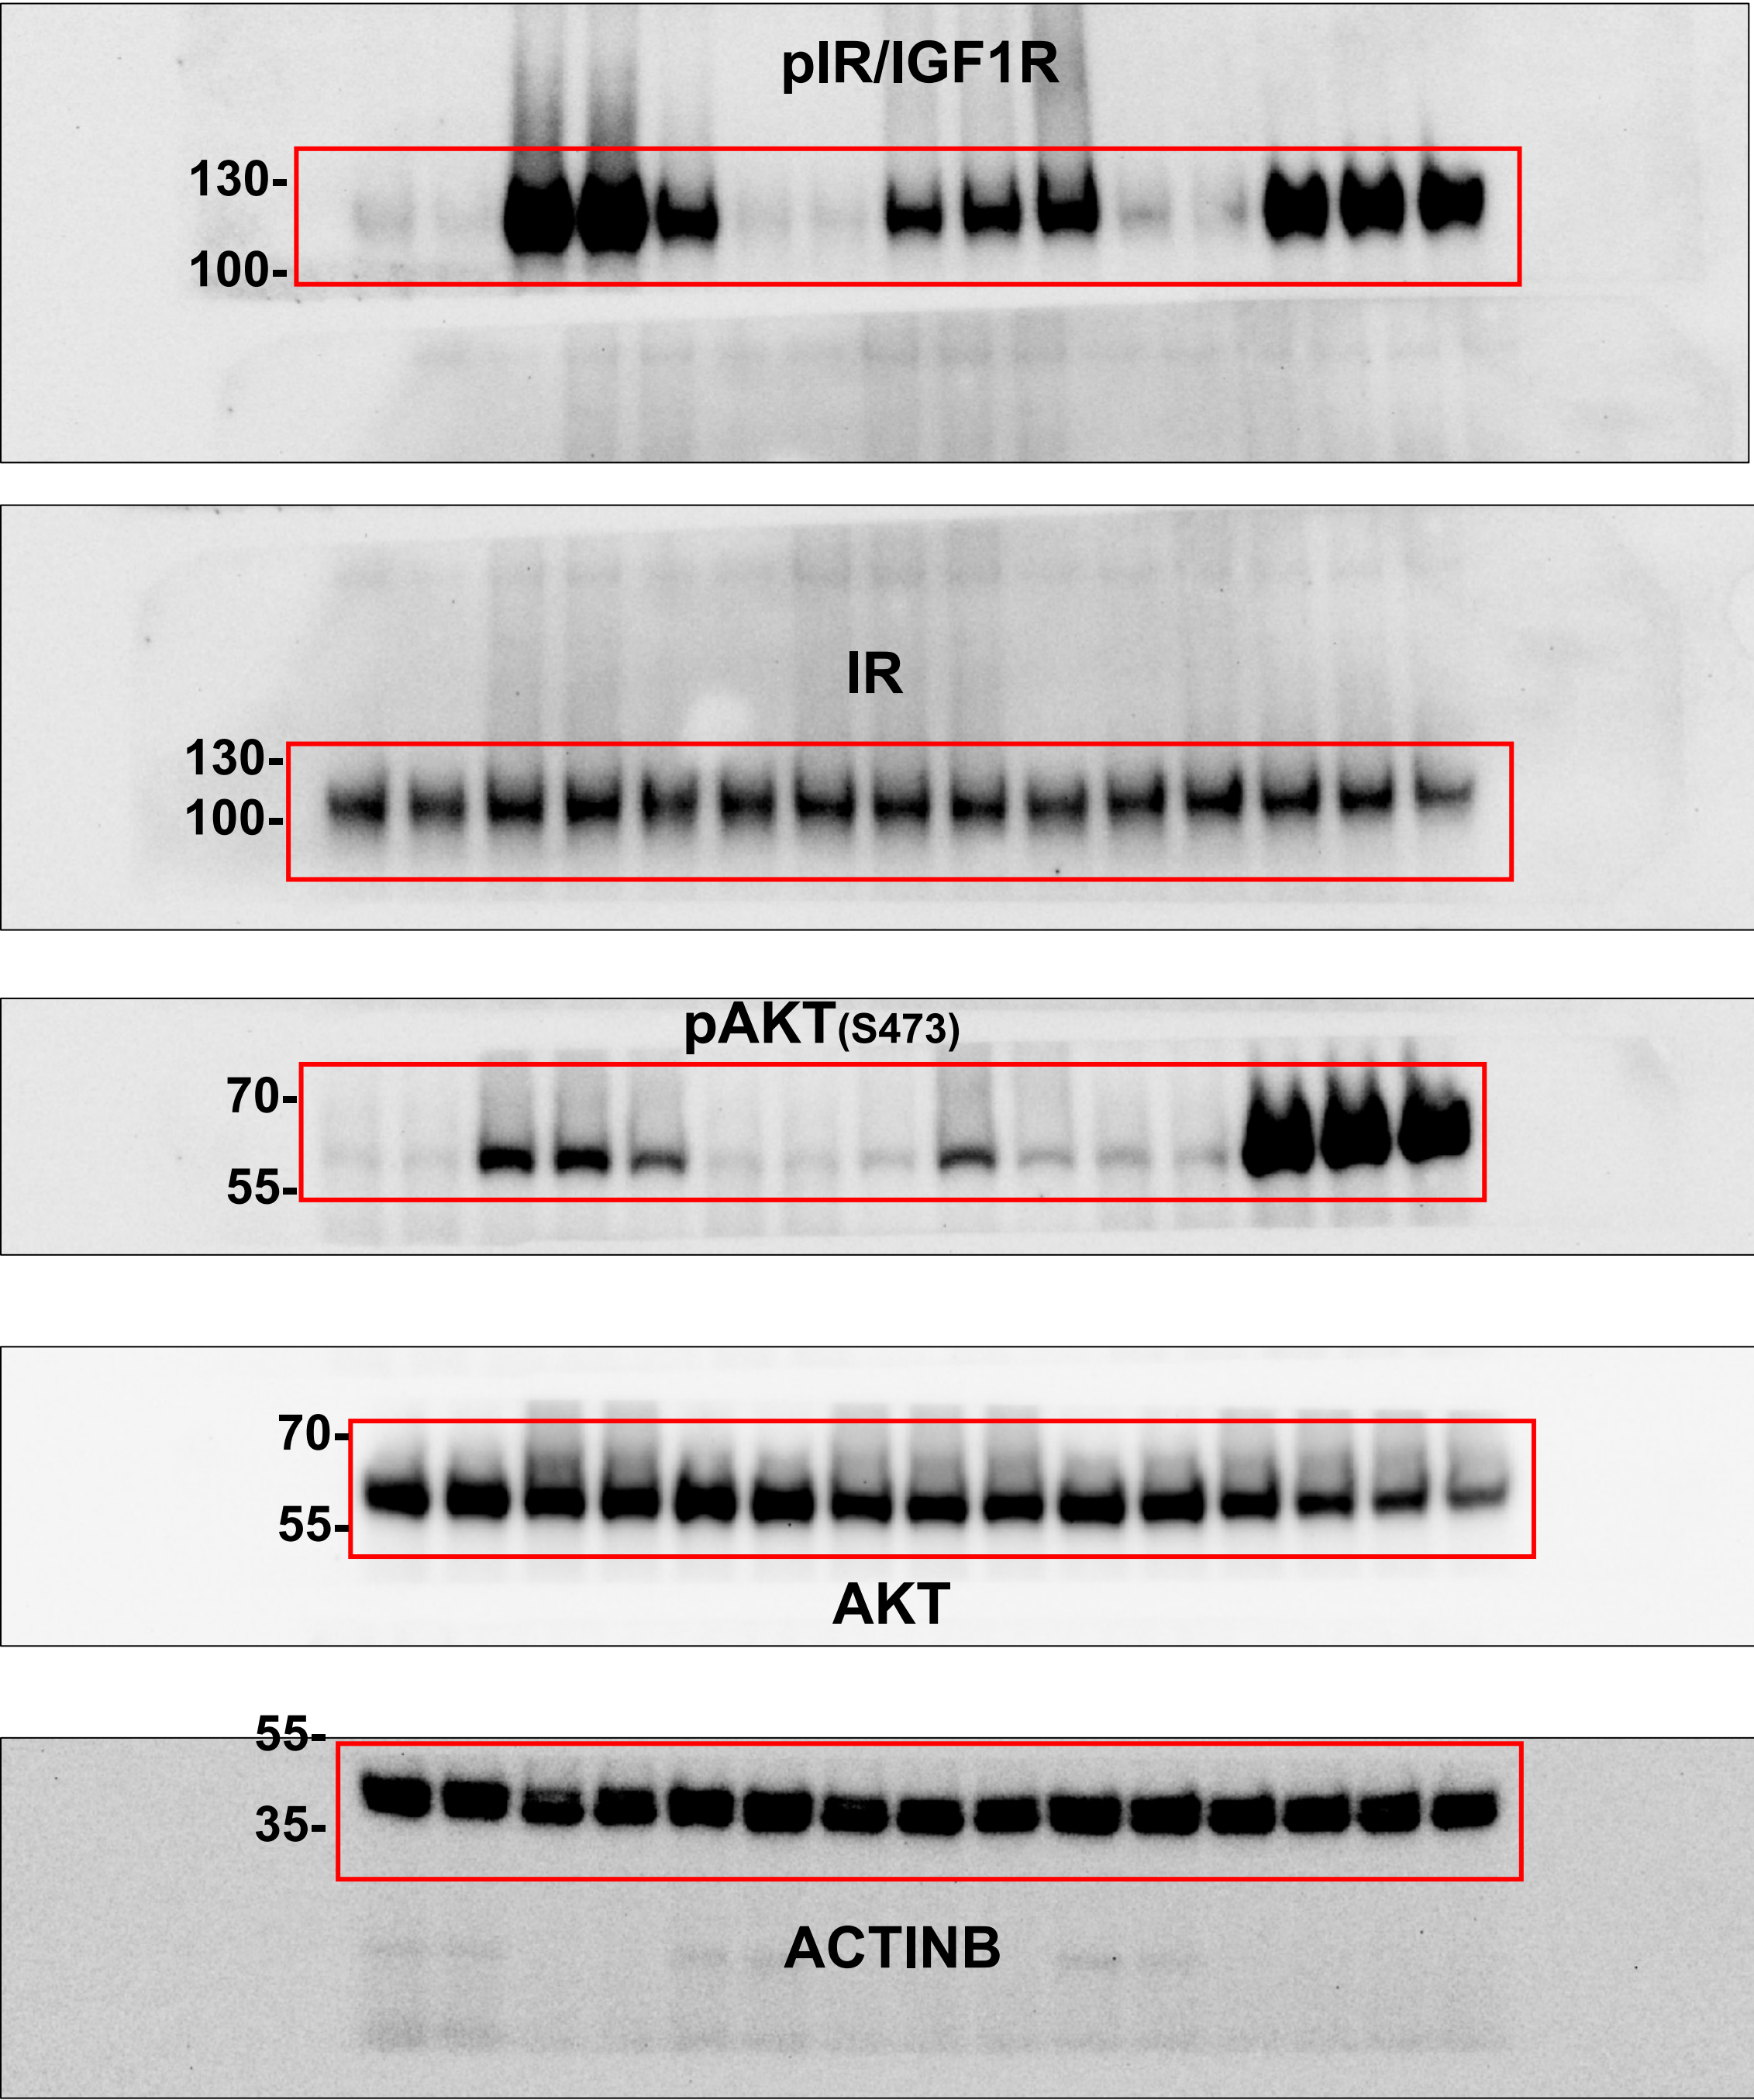

Supplement: MOESM4 [file uncropped WB for sup Figures.pdf › Source data/uncropped WB for sup Figures.pdf]
